# Supplementary material
Source: Research Square preprint supplement (doi:10.21203/rs.3.rs-8656581/v1)

Figure 1

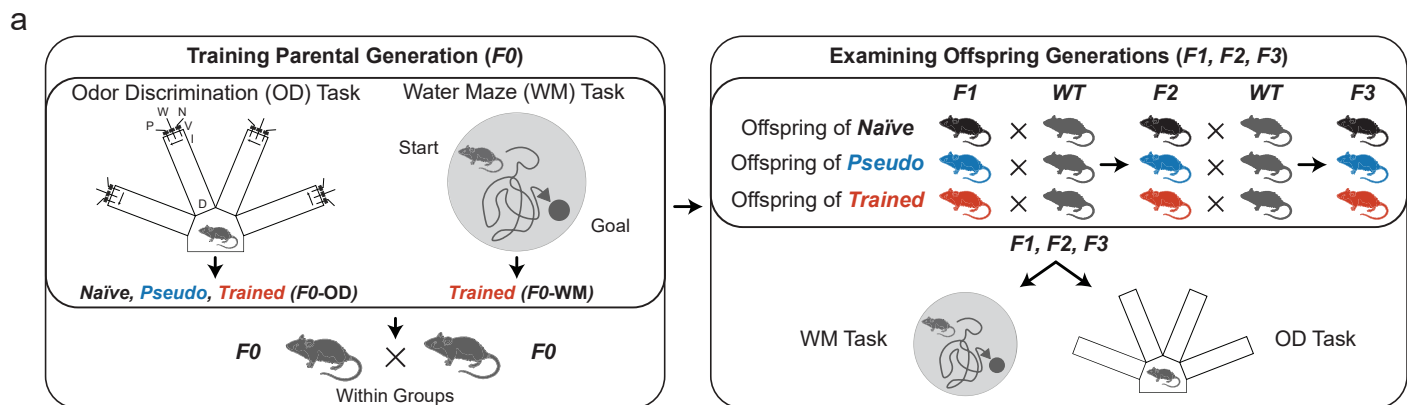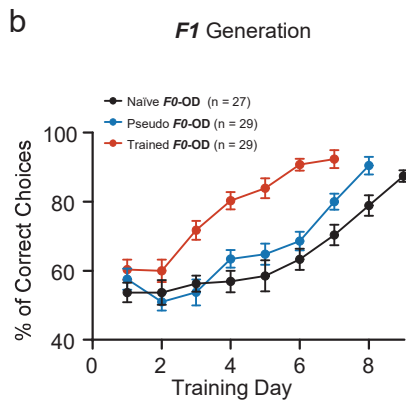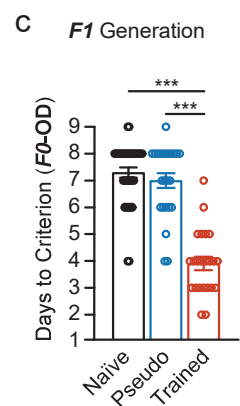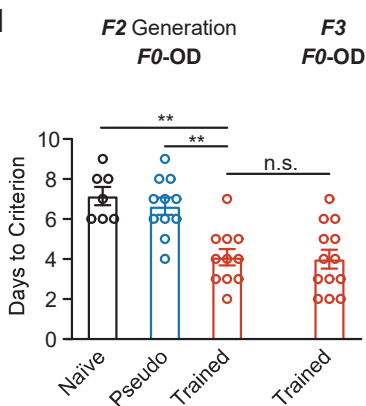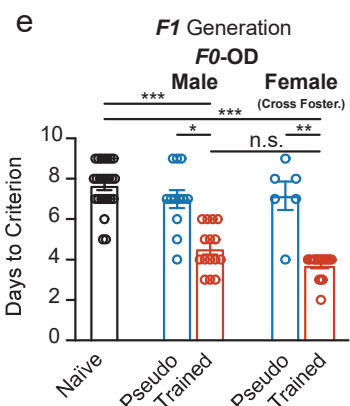

Figure 2

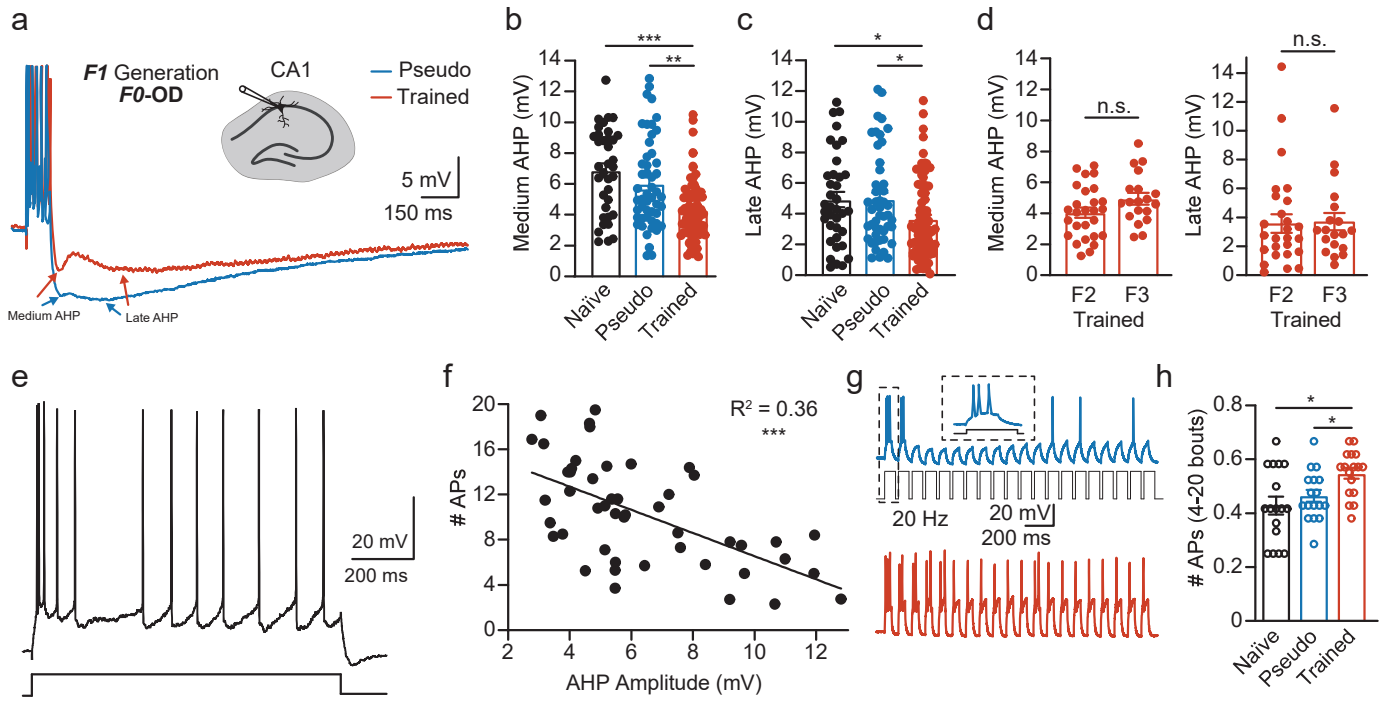

Figure 3

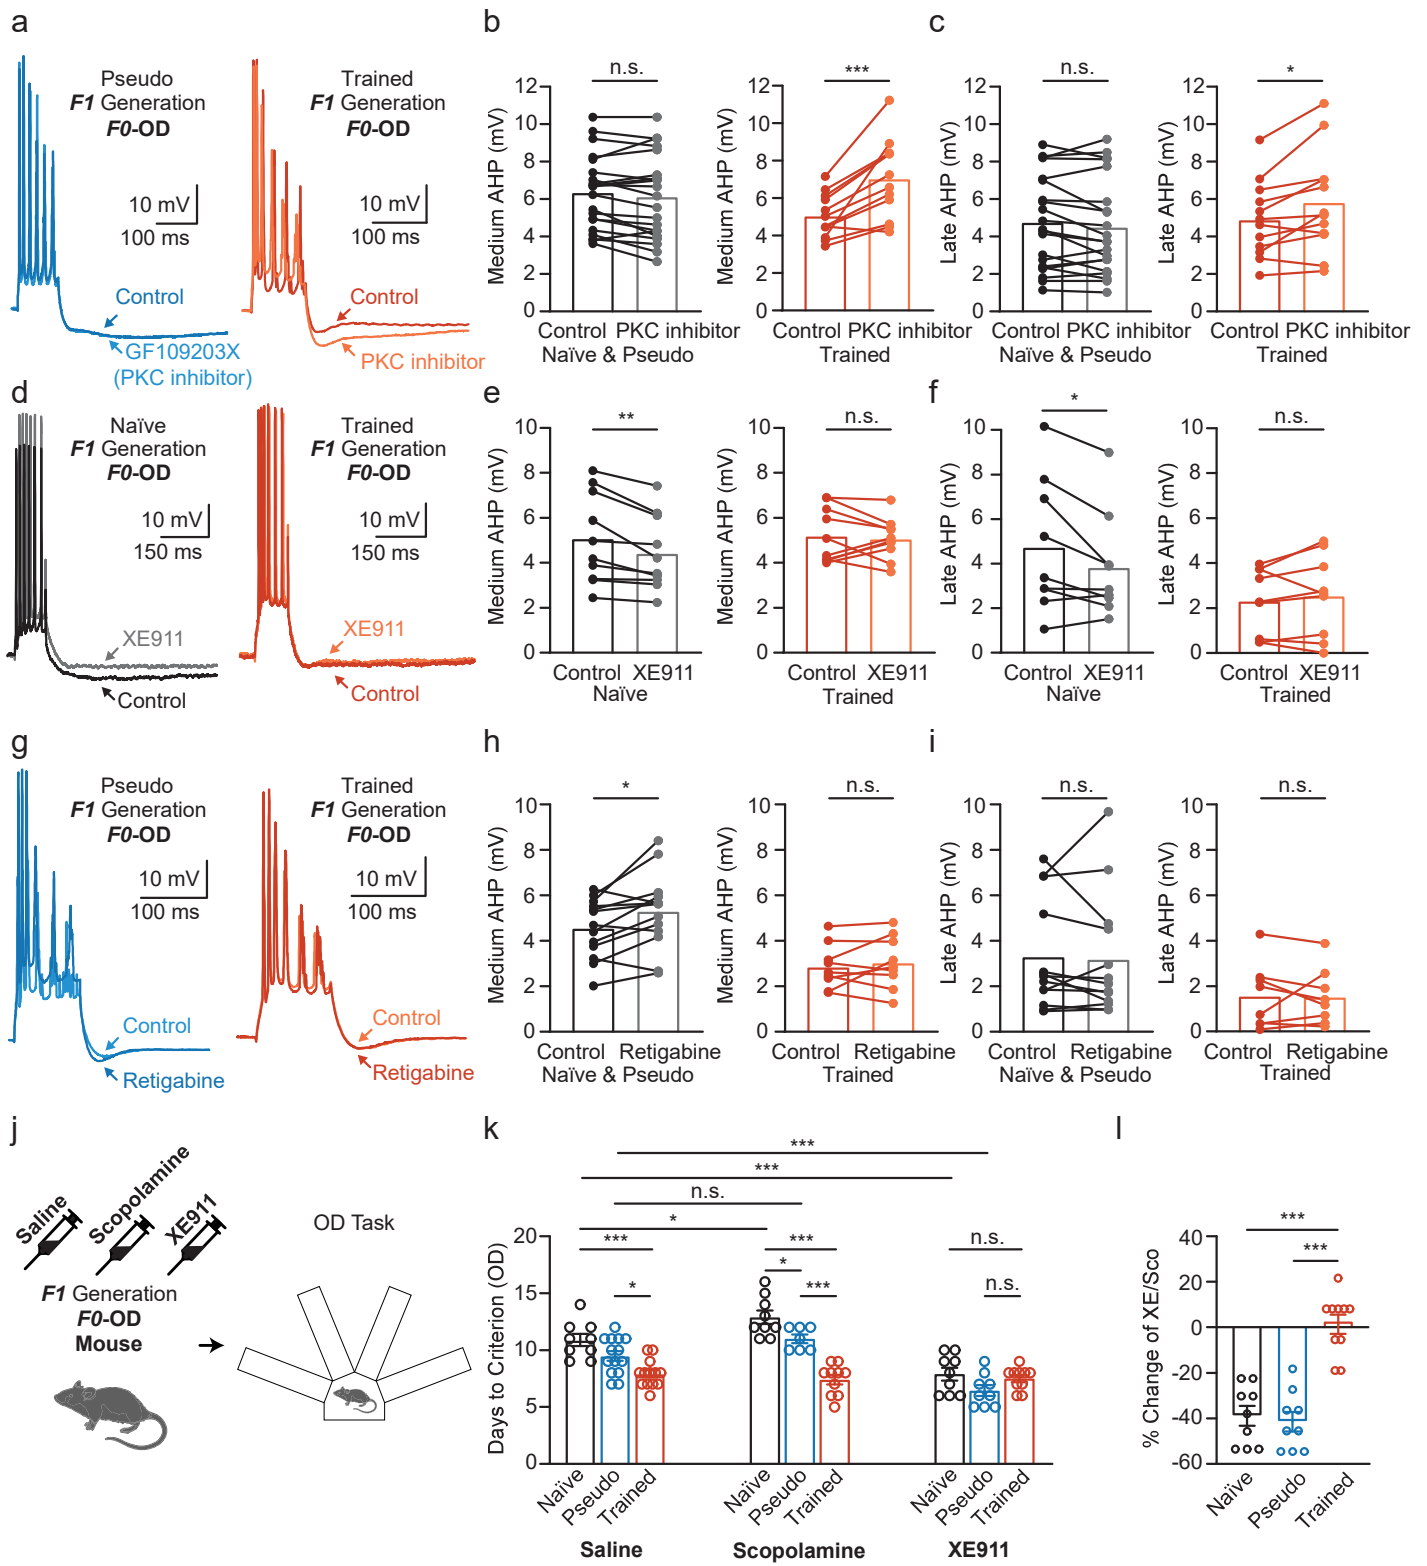

Figure 4

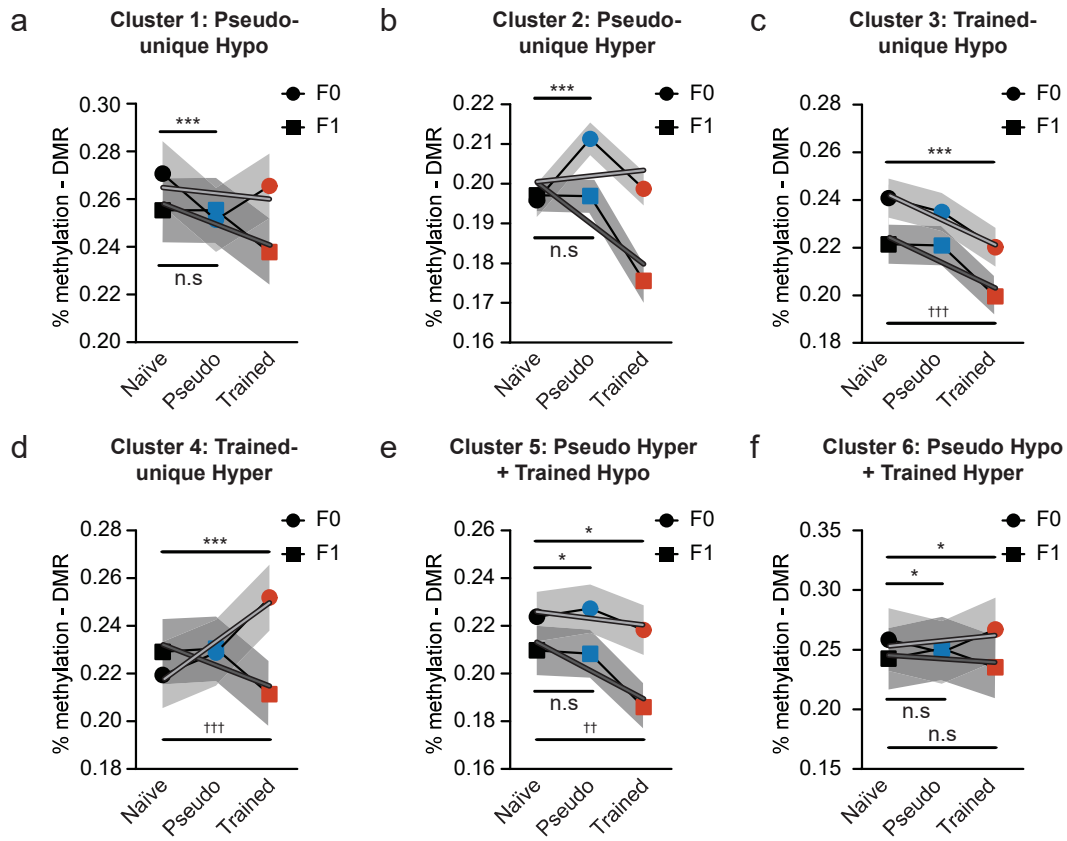

Figure 5

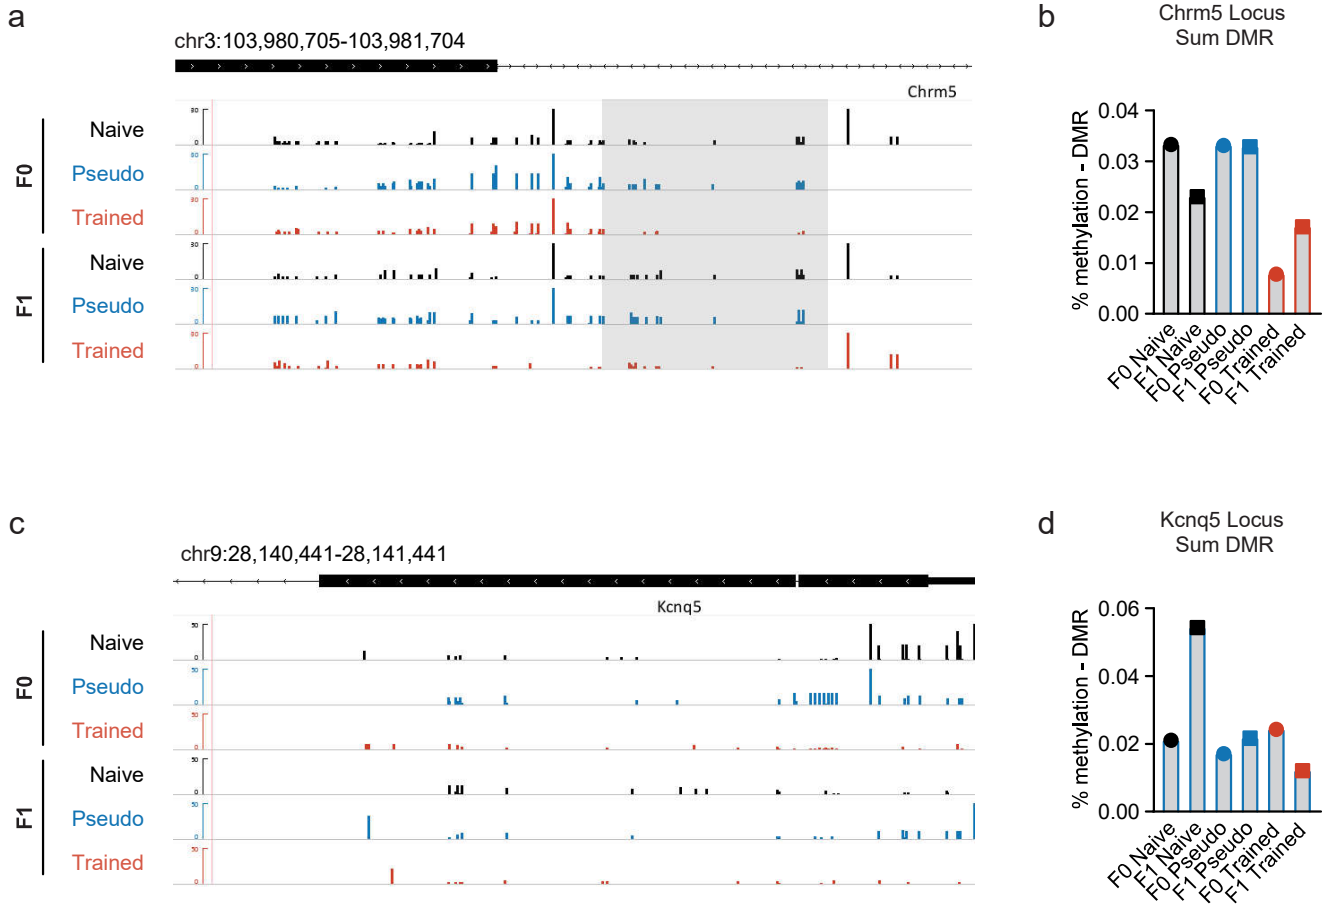

# Supplementary Figure 1

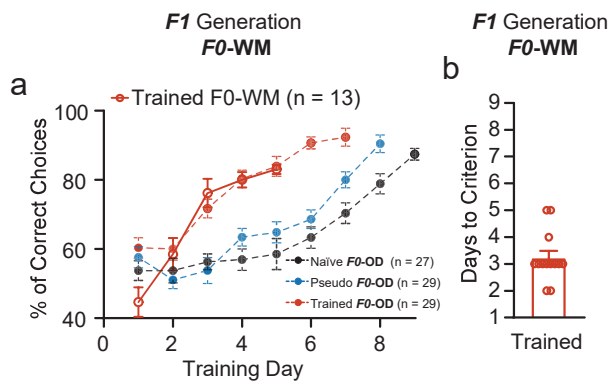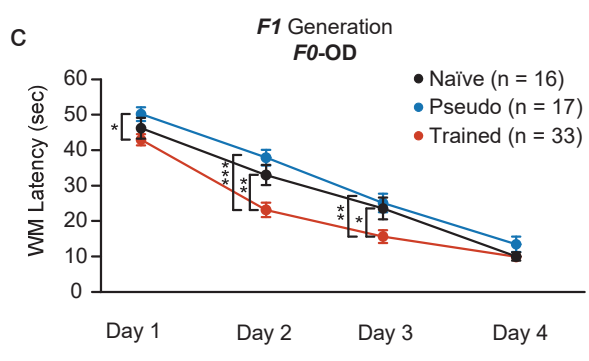

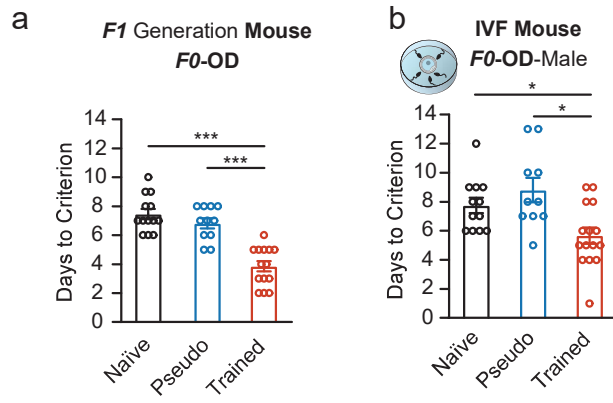

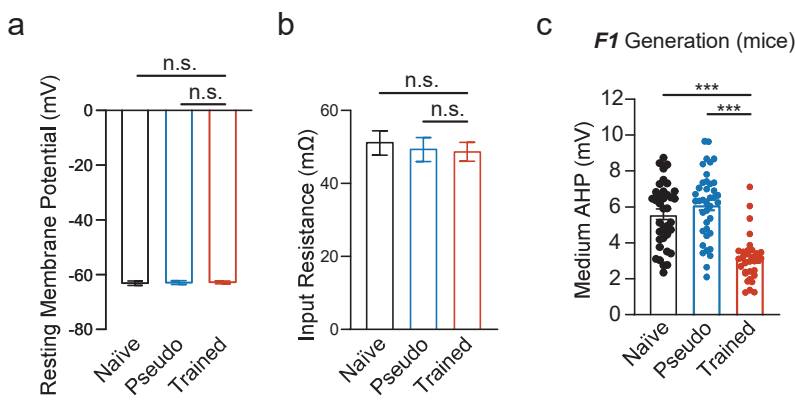

Supplementary Figure 4

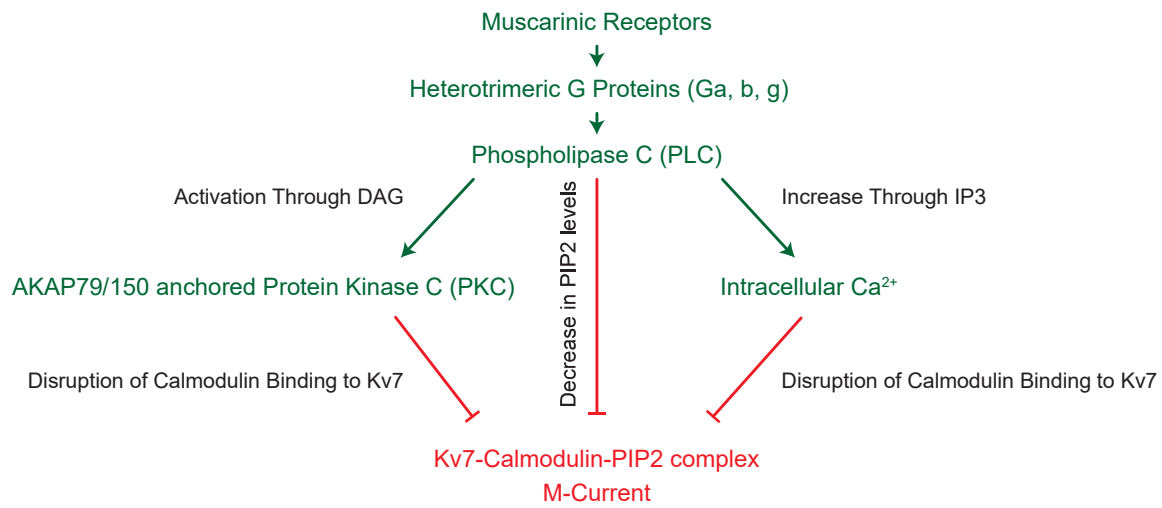

Supplementary Figure 5

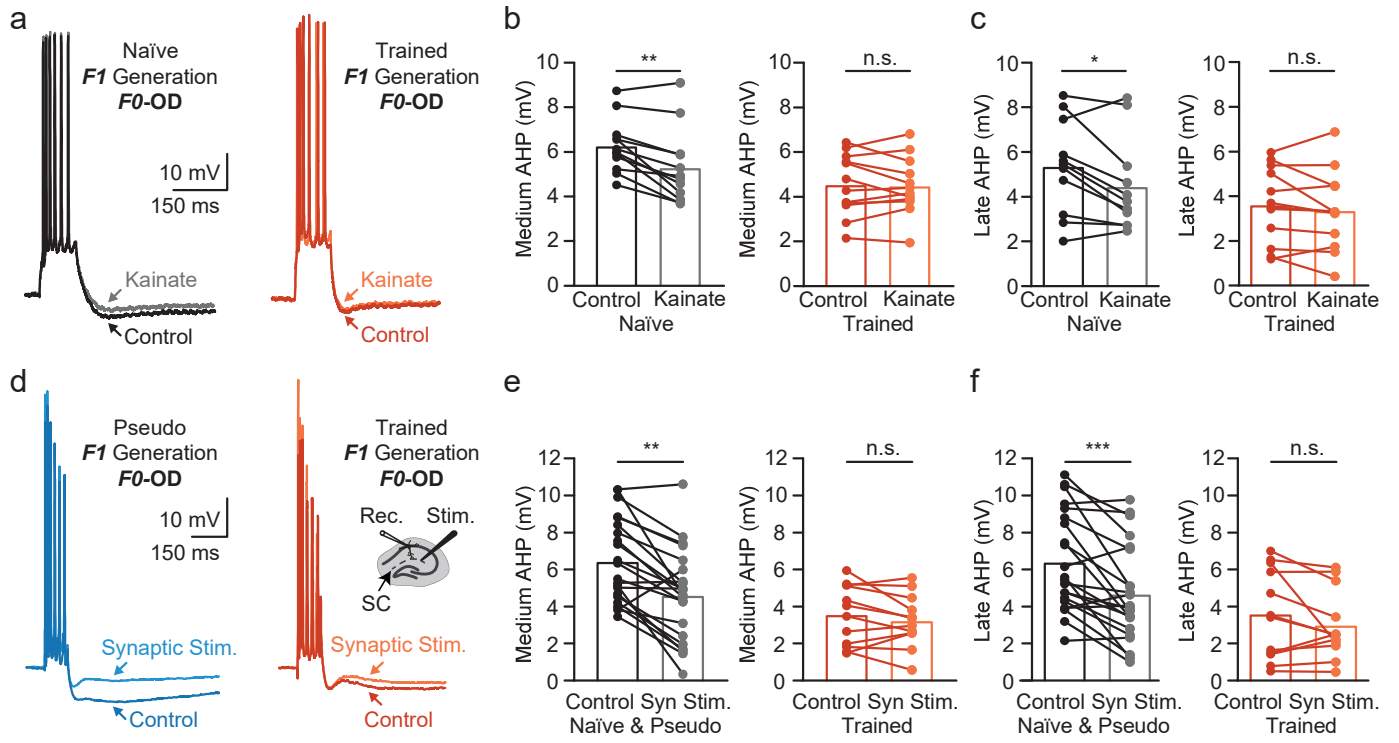

Supplementary Figure 6

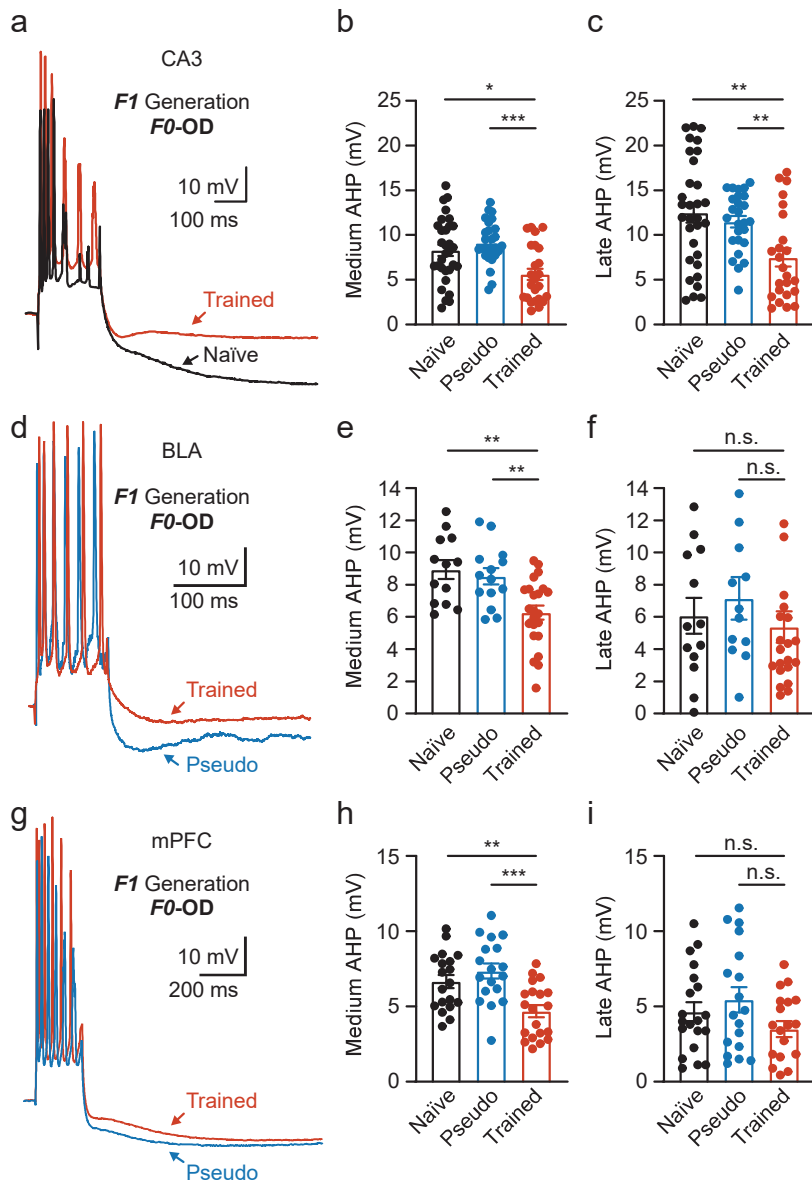

# Supplementary Figure 7

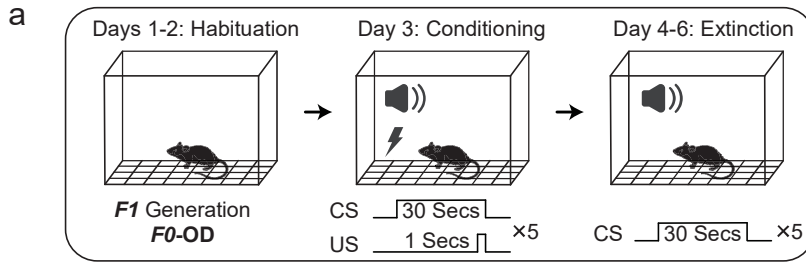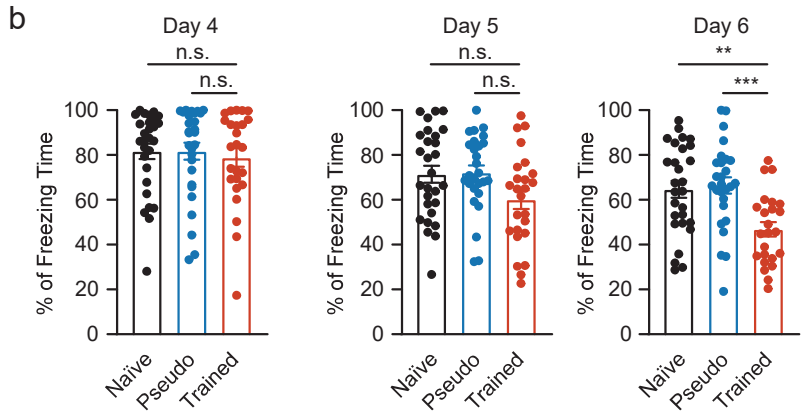

Supplementary Figure 8

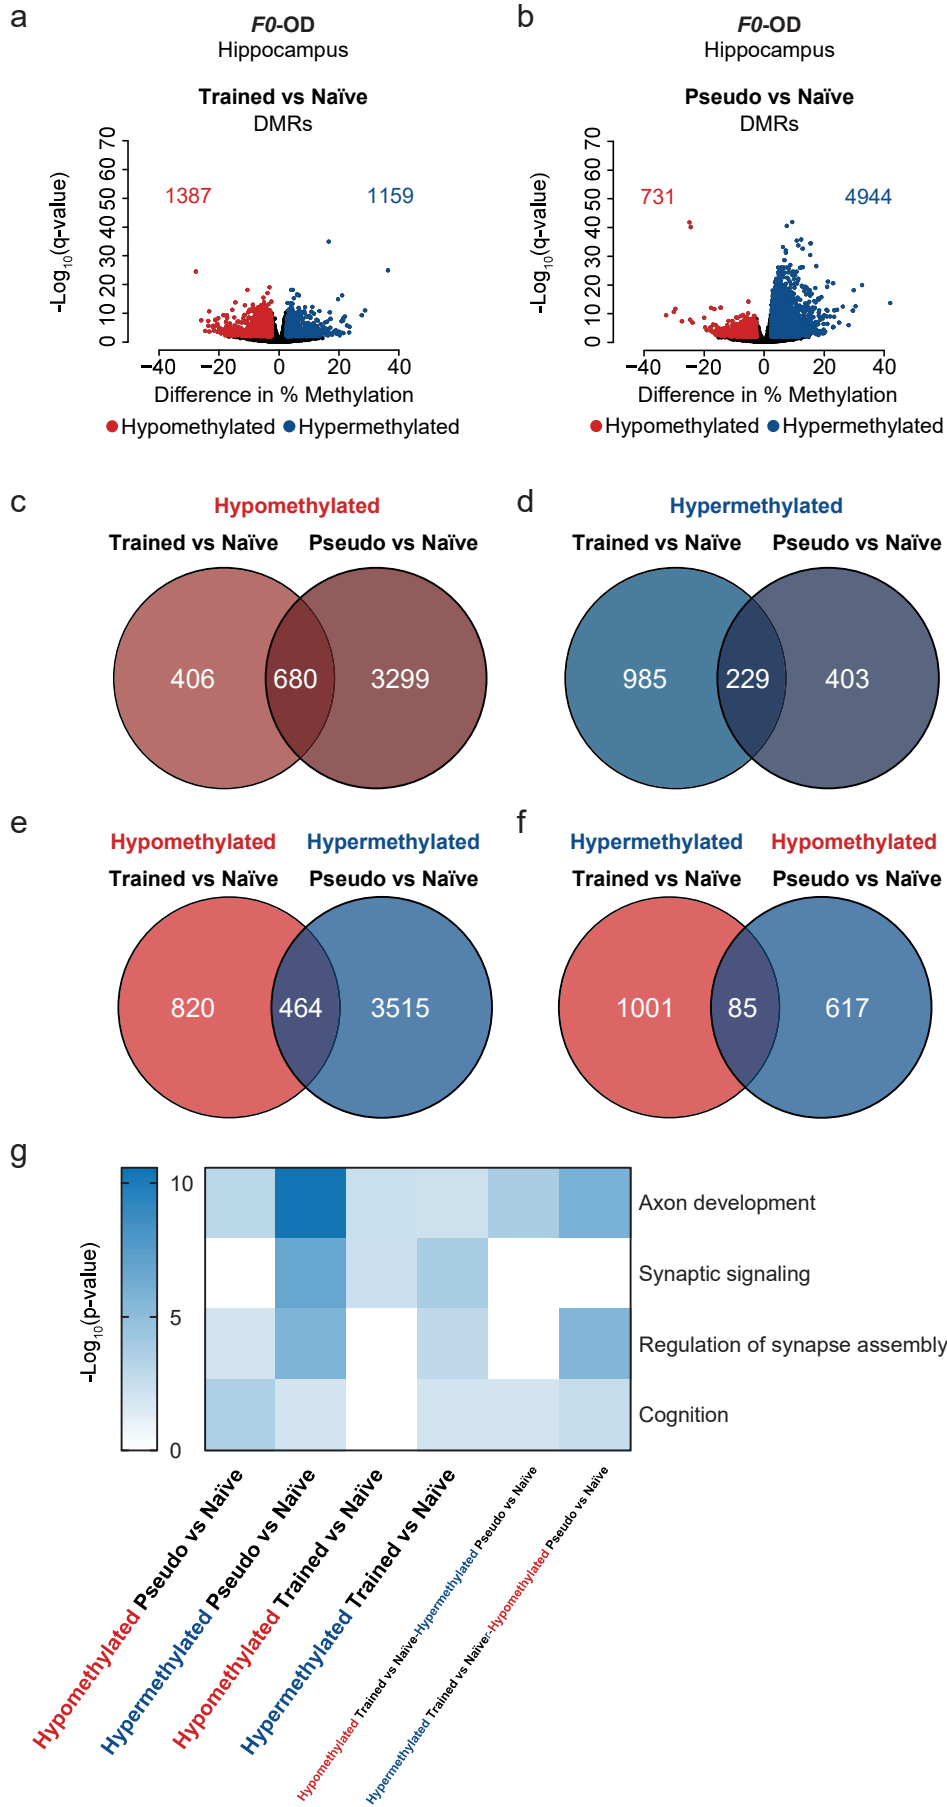

Supplementary Figure 9

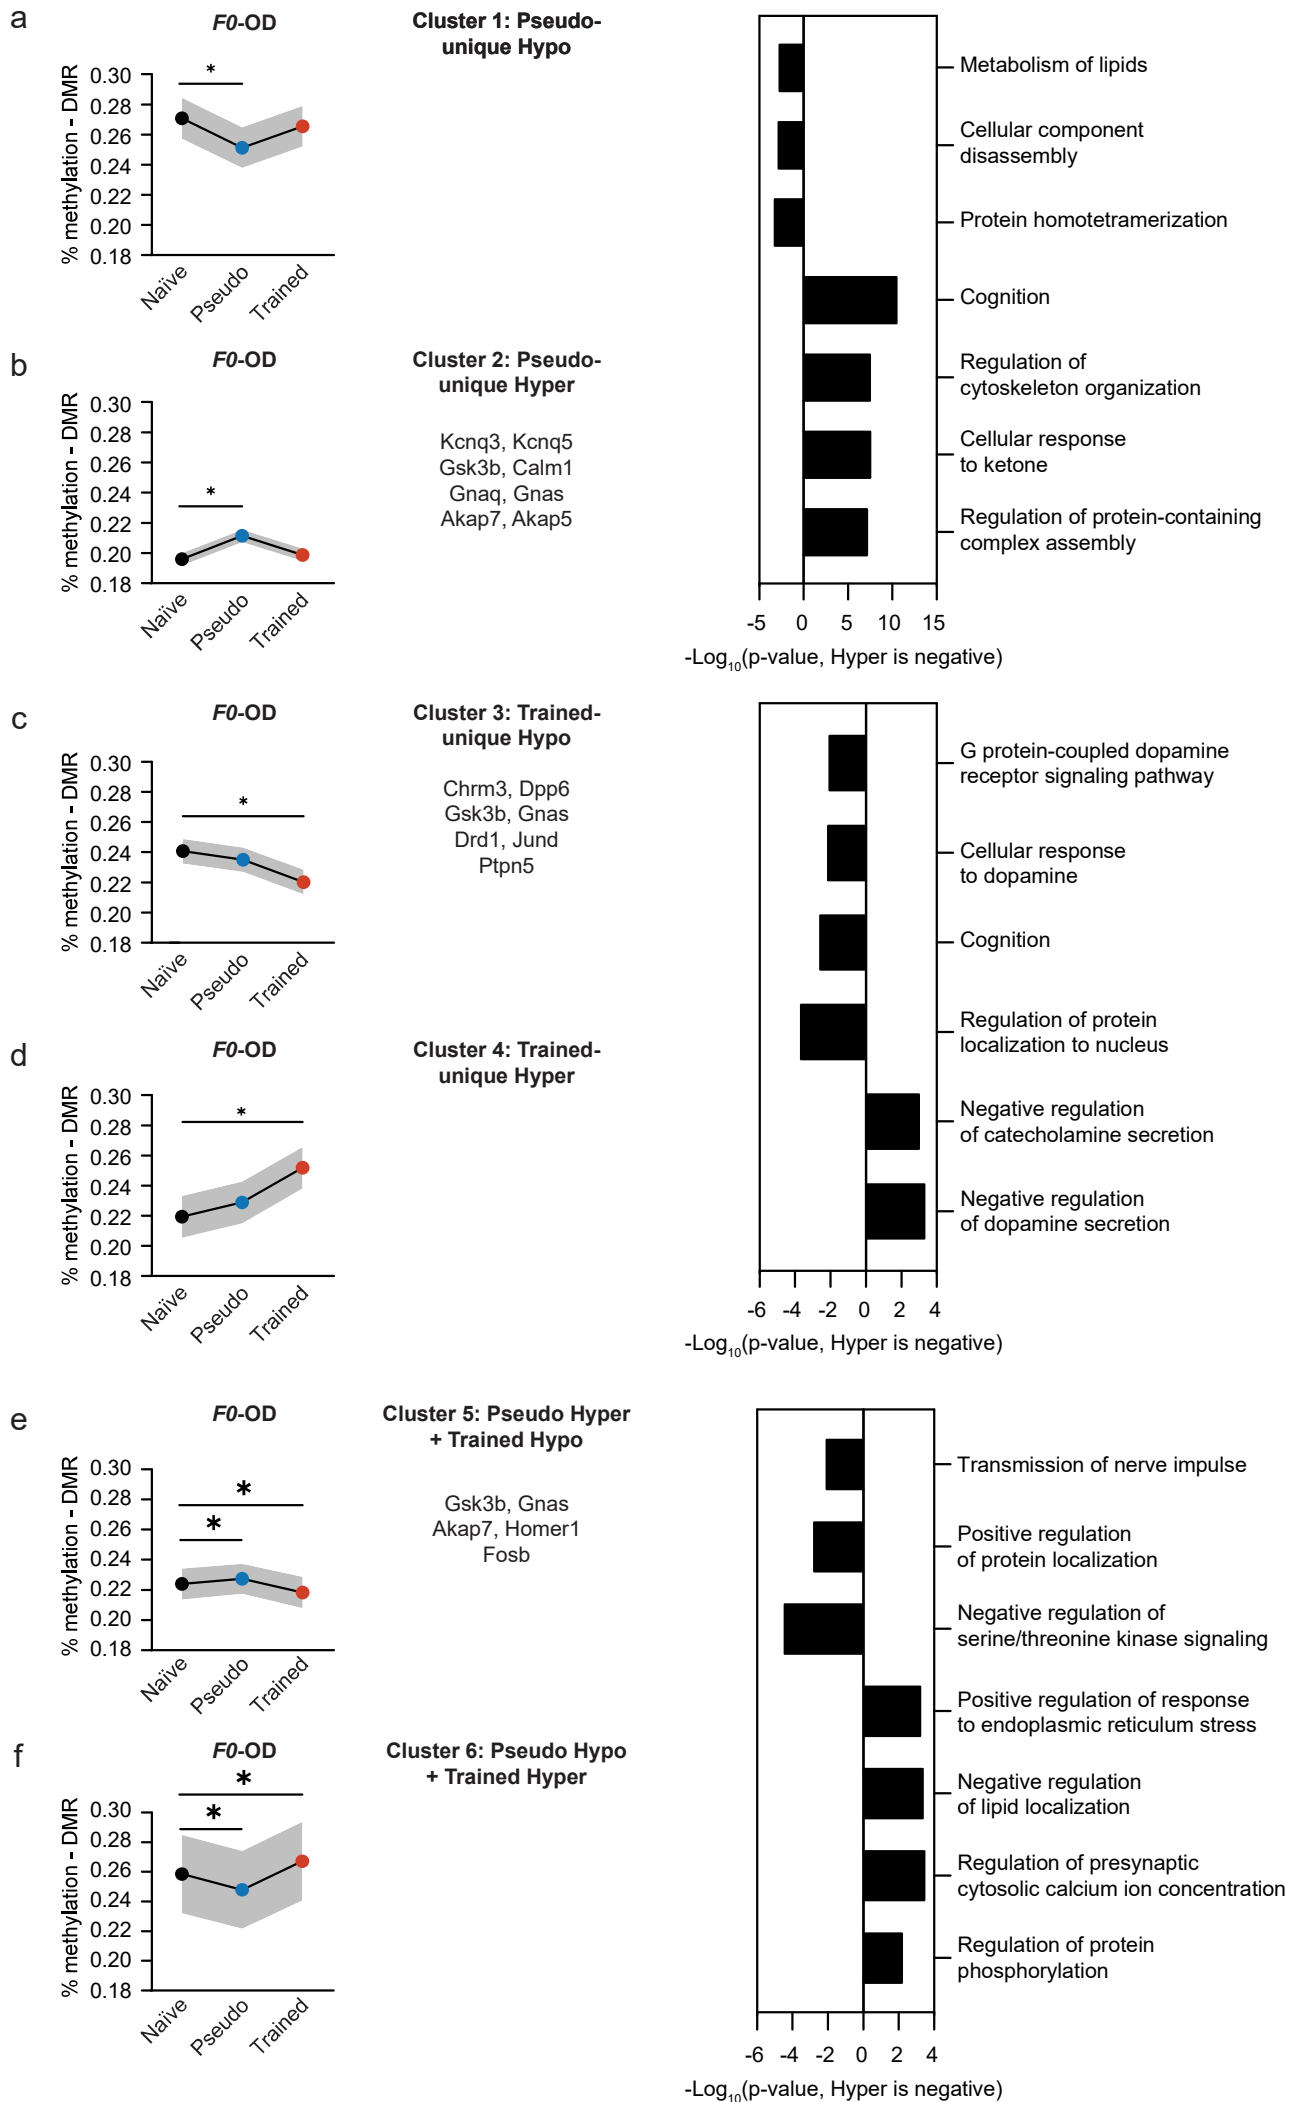

Supplementary Figure 10

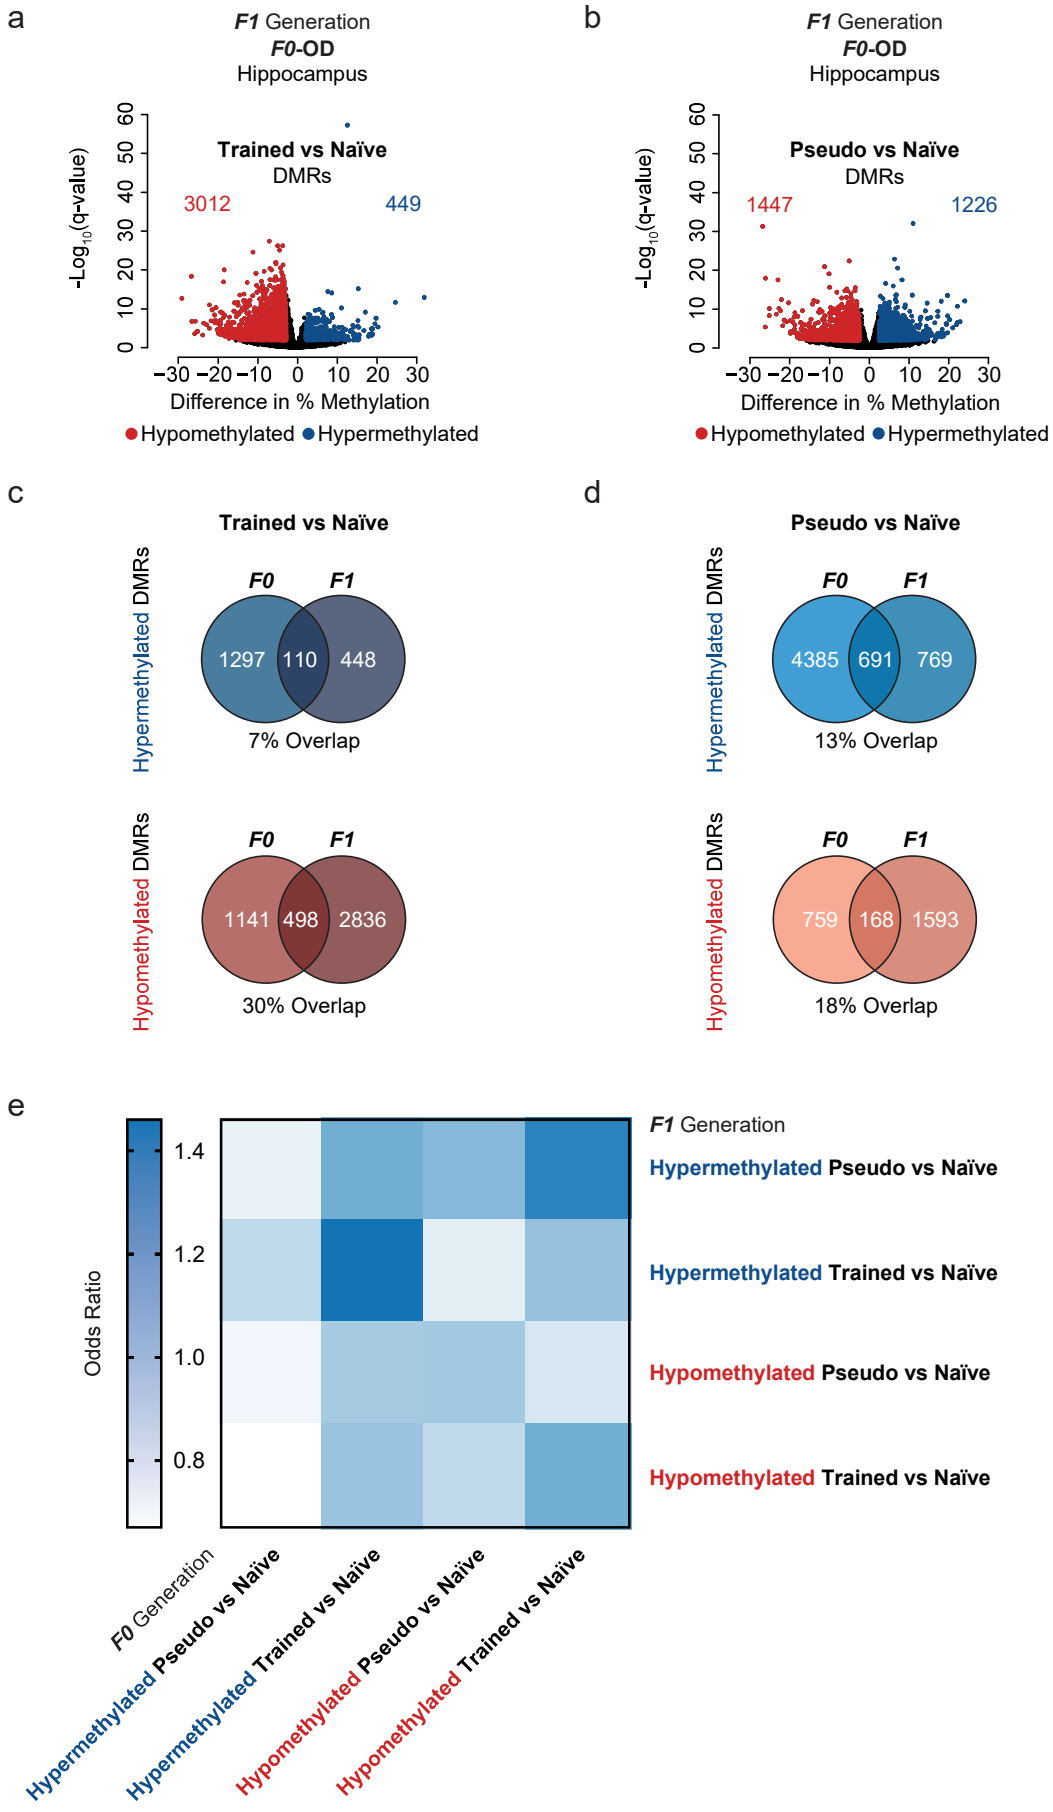

Supplement: Supplementary file 1 [file b6b581760dafad82f4bbfc12.pdf]
