# Supplementary material
Source: Research Square preprint supplement (doi:10.21203/rs.3.rs-8656581/v1)
Supplement: Supplementary file 1 [file 4ffffcf7e5b3b4c557c435f2.xlsx]

## Sheet: DMR-F0NvsF0P
	start			target.row	dist.to.feature	feature.name	feature.strand	UTR5	UTR3	prom	exon	intron	pvalue	qvalue	meth.diff	width	external_gene_name	Gene Name	gene_biotype
chr10	13578001	13579001		13694	1822	ENSRNOG00000006970	-	0	0	0	1	1	3.6e-16	1.76e-14	42.0216	1000	Ntn3	Tbc1d24	protein_coding
chr3	166933001	166934001		5572	59941	ENSRNOG00000021787	-	0	0	0	0	0	5.38e-23	1.02e-20	32.6542	1000	Zfp217	Zfp217	protein_coding
chr1	203760001	203761001		1768	-210153	ENSRNOG00000047057	+	0	0	0	0	0	6.96e-15	2.6e-13	30.4737	1000	Gpr26	Gpr26	protein_coding
chr19	22425001	22426001		21438	-8399	ENSRNOG00000061181	-	0	0	0	0	0	4.75e-21	6.09e-19	29.9119	1000	AC122999.1	Neto2	miRNA
chr7	140577001	140578001		11215	2784	ENSRNOG00000053675	-	0	0	0	1	1	3.28e-13	8.12e-12	29.6069	1000	Dhh	Dhh	protein_coding
chr6	125742001	125743001		9539	-18058	ENSRNOG00000050539	-	0	1	0	1	0	1.5e-07	1.02e-06	28.2035	1000	Fbln5	Fbln5	protein_coding
chr4	159284001	159285001		6817	2194	ENSRNOG00000052486	-	0	0	0	1	0	9.39e-15	3.39e-13	26.2467	1000	Kcna6	Kcna6	protein_coding
chr14	11164001	11165001		17814	-19228	ENSRNOG00000002262	+	0	1	0	1	1	1.44e-08	1.24e-07	25.0244	1000	Enoph1	Enoph1	protein_coding
chr19	54145001	54146001		21849	17609	ENSRNOG00000017575	-	0	0	0	1	1	1.74e-13	4.62e-12	24.3602	1000	Gins2	Gins2	protein_coding
chr5	153347001	153348001		8172	55956	ENSRNOG00000054630	-	0	0	0	0	0	2.33e-13	6.04e-12	23.4064	1000	AABR07050146.1	Syf2	lincRNA
chr12	24680001	24681001		16416	312	ENSRNOG00000061095	+	0	1	1	1	1	7.85e-11	1.16e-09	23.3228	1000		Bud23	scaRNA
chr11	80841001	80842001		15843	-14497	ENSRNOG00000021992	-	0	0	0	0	0	7.9e-07	4.56e-06	23.1543	1000	Rtp1	Rtp1	protein_coding
chr2	5437001	5438001		2686	0	ENSRNOG00000062285	+	1	0	1	1	1	6.65e-07	3.91e-06	23.0207	1000	Pou5f2	Pou5f2	protein_coding
chr16	20008001	20009001		19353	8890	ENSRNOG00000018170	+	0	0	0	1	1	1.22e-23	2.59e-21	22.9922	1000	Slc27a1	Slc27a1	protein_coding
chr3	154665001	154666001		5347	-37745	ENSRNOG00000012956	-	0	0	0	0	0	9.77e-07	5.54e-06	22.9374	1000	Tgm2	Tgm2	protein_coding
chr17	6973001	6974001		19959	37142	ENSRNOG00000019533	+	0	0	0	0	1	5.66e-11	8.55e-10	22.0159	1000	Klhl3	Mir874	protein_coding
chr20	5375001	5376001		22147	0	ENSRNOG00000030712	+	1	0	1	1	1	3.19e-24	7.33e-22	21.2832	1000	RT1-A2	RT1-A2	protein_coding
chr9	7467001	7468001		12653	0	ENSRNOG00000056784	-	0	0	1	1	0	4.14e-13	9.91e-12	21.1115	1000	5_8S_rRNA	Vom2r76	rRNA
chr5	137038001	137039001		7787	-23572	ENSRNOG00000019956	-	0	1	0	1	1	4.62e-08	3.57e-07	21.0711	1000	Kdm4a	Kdm4a	protein_coding
chr19	44714001	44715001		21733	24804	ENSRNOG00000057385	-	0	0	0	0	0	2.67e-22	4.45e-20	20.9922	1000	LOC102555326	Cntnap4	lincRNA
chr3	175427001	175428001		5705	250	ENSRNOG00000060010	+	0	0	1	0	1	6.69e-11	9.95e-10	20.9293	1000	Ss18l1	Ss18l1	protein_coding
chr6	28382001	28383001		8940	0	ENSRNOG00000012686	+	1	0	1	1	0	1.62e-13	4.36e-12	20.8413	1000	Pomc	Pomc	protein_coding
chr2	61006001	61007001		3002	768	ENSRNOG00000023126	-	0	0	1	1	0	4.33e-05	0.000154073	20.357	1000	Rxfp3	Rxfp3	protein_coding
chr1	48002001	48003001		281	5481	ENSRNOG00000013975	+	0	0	0	0	1	2.27e-11	3.75e-10	20.0679	1000	Acat2l1	Acat2	protein_coding
chr6	45021001	45022001		9038	-1499	ENSRNOG00000053810	+	0	0	1	0	0	0.000188626	0.000549192	20	1000	AABR07063741.1	Rnf144a	lincRNA
chrX	37154001	37155001		22878	-106465	ENSRNOG00000004319	+	0	0	0	0	0	4.63e-08	3.57e-07	19.856	1000	AABR07038019.1	Adgrg2	processed_pseudogene
chr5	5592001	5593001		7022	8841	ENSRNOG00000055115	-	0	0	0	0	0	8.34e-06	3.64e-05	19.8235	1000	7SK	Mir378b	misc_RNA
chr10	103325001	103326001		15145	14923	ENSRNOG00000003109	-	0	0	0	1	1	3.56e-10	4.55e-09	19.5455	1000	Btbd17	Btbd17	protein_coding
chr18	79412001	79413001		21226	5621	ENSRNOG00000016516	+	0	0	0	0	1	0.000261489	0.0007269	19.538	1000	Mbp	Mbp	protein_coding
chr6	9867001	9868001		8809	76580	ENSRNOG00000015603	+	0	0	0	0	1	9.76e-11	1.41e-09	19.1357	1000	Prkce	RGD1562146	protein_coding
chr10	45659001	45660001		14058	0	ENSRNOG00000003066	+	0	0	1	1	1	2.22e-18	1.68e-16	19.0593	1000	Wnt9a	Wnt9a	protein_coding
chr6	96782001	96783001		9282	-27908	ENSRNOG00000008292	+	0	0	0	0	0	6.22e-05	0.00021156	18.9899	1000	Hif1a	Hif1a	protein_coding
chr13	49729001	49730001		17135	68646	ENSRNOG00000009691	+	0	1	0	1	0	1.04e-09	1.17e-08	18.7247	1000	Lrrn2	Lrrn2	protein_coding
chr5	5691001	5692001		7024	0	ENSRNOG00000059973	-	0	0	1	1	1	0.000141872	0.000429958	18.5897	1000	AABR07046763.1	Ncoa2	protein_coding
chr20	12116001	12117001		22375	11748	ENSRNOG00000001228	-	0	0	0	0	0	3.53e-05	0.000128716	18.5325	1000	Pofut2	Pofut2	protein_coding
chr12	45713001	45714001		16775	-13113	ENSRNOG00000001141	+	0	0	0	0	0	2.97e-05	0.000111026	18.4425	1000	Srrm4	Srrm4	protein_coding
chr14	107749001	107750001		18432	-163	ENSRNOG00000009281	+	0	0	1	0	1	3.33e-13	8.21e-12	18.38	1000	Commd1	Zrsr1	protein_coding
chr13	85919001	85920001		17390	750	ENSRNOG00000004642	+	0	0	1	0	1	1.77e-17	1.17e-15	18.2744	1000	Lmx1a	Lmx1a	protein_coding
chr16	3537001	3538001		19189	224878	ENSRNOG00000025408	-	0	0	0	1	1	3.68e-11	5.83e-10	18.2143	1000	Dux4	Erc2	protein_coding
chr1	125952001	125953001		1156	14757	ENSRNOG00000023496	-	0	0	0	0	1	2.22e-12	4.61e-11	18.1983	1000	Fam189a1	Tjp1	protein_coding
chr20	10156001	10157001		22326	32351	ENSRNOG00000001174	+	0	0	0	0	1	0.00129279	0.00290824	18.0992	1000	Pde9a	Pde9a	protein_coding
chr1	259357001	259358001		2356	0	ENSRNOG00000016166	-	1	0	1	1	0	8.03e-18	5.67e-16	18.046	1000	Pdlim1	Pdlim1	protein_coding
chr20	11129001	11130001		22345	14838	ENSRNOG00000001205	+	0	0	0	1	1	4.94e-08	3.8e-07	18.0049	1000	Agpat3	Agpat3	protein_coding
chr5	170419001	170420001		8604	-190960	ENSRNOG00000055828	+	0	0	0	0	0	5.28e-05	0.000183121	17.9665	1000	AABR07050593.1	Ajap1	miRNA
chr8	116882001	116883001		12402	-1828	ENSRNOG00000056737	-	0	0	1	1	1	1.25e-08	1.1e-07	17.9513	1000	AC128059.4	Apeh	miRNA
chr1	78777001	78778001		501	9091	ENSRNOG00000016434	+	0	0	0	1	1	2.28e-05	8.78e-05	17.8397	1000	Prkd2	Prkd2	protein_coding
chr5	153531001	153532001		8184	17835	ENSRNOG00000047722	-	0	0	0	1	0	3.67e-05	0.000133077	17.7713	1000	AABR07050149.1	Runx3	miRNA
chr15	18851001	18852001		18595	30960	ENSRNOG00000009470	-	0	0	0	0	1	5.99e-08	4.51e-07	17.4634	1000	Flnb	Flnb	protein_coding
chr8	21900001	21901001		11506	830	ENSRNOG00000020603	-	1	0	1	1	1	3.15e-30	2.62e-27	17.409	1000	Angptl6	Angptl6	protein_coding
chr20	4626001	4627001		22112	12414	ENSRNOG00000032942	+	0	0	0	0	0	0.000226762	0.000642416	17.3973	1000	Neu1	Neu1	protein_coding
chr4	7220001	7221001		5843	7676	ENSRNOG00000012764	-	0	0	0	0	1	8.08e-06	3.54e-05	17.3951	1000	Agap3	Agap3	protein_coding
chr10	15812001	15813001		13797	-23935	ENSRNOG00000054167	+	0	0	0	0	0	0.000408141	0.00107138	17.3143	1000	AABR07029218.1	Il9r	lincRNA
chr1	280339001	280340001		2627	-189	ENSRNOG00000008824	-	0	0	1	0	0	1.18e-07	8.25e-07	17.3069	1000	Vax1	Vax1	protein_coding
chr4	59014001	59015001		6133	0	ENSRNOG00000032847	-	0	0	1	1	0	4.14e-08	3.24e-07	17.2936	1000	AABR07060145.1	Podxl	protein_coding
chr3	168463001	168464001		5593	117850	ENSRNOG00000013196	+	0	0	0	0	1	7.74e-09	7.18e-08	17.2257	1000	Dok5	Dok5	protein_coding
chr6	69968001	69969001		9118	-2228	ENSRNOG00000047891	+	0	0	1	0	0	1.96e-16	1.04e-14	17.141	1000	Foxg1	Foxg1	protein_coding
chr3	141414001	141415001		5165	-2832	ENSRNOG00000012728	-	0	0	1	0	0	7.88e-05	0.00025854	17.0815	1000	Nkx2-2	Nkx2-2	protein_coding
chr7	27602001	27603001		10232	12246	ENSRNOG00000054383	+	0	0	0	0	0	1.75e-07	1.18e-06	17.0592	1000	AABR07056509.1	Stab2	lincRNA
chr14	82054001	82055001		18198	291	ENSRNOG00000038150	-	1	0	1	1	1	7.74e-22	1.19e-19	17.0357	1000	RGD1560394	RGD1560394	protein_coding
chr4	116968001	116969001		6453	0	ENSRNOG00000015493	+	1	0	1	1	1	3.01e-14	9.71e-13	16.9912	1000	Emx1	Spr	protein_coding
chr5	159037001	159038001		8332	-62736	ENSRNOG00000053597	-	0	0	0	0	1	1.73e-06	9.17e-06	16.9742	1000	AABR07050274.1	Padi6	lincRNA
chr4	12187001	12188001		5916	3407	ENSRNOG00000051840	+	0	0	0	0	0	0.000145825	0.000439642	16.875	1000	U6	Magi2	snRNA
chr17	23245001	23246001		20191	109017	ENSRNOG00000014548	+	0	0	0	0	0	5.7e-05	0.000195809	16.8277	1000	Nedd9	Phactr1	protein_coding
chr17	86185001	86186001		20590	-13624	ENSRNOG00000016902	+	0	0	0	0	0	6.63e-17	3.86e-15	16.7376	1000	Ptf1a	Ptf1a	protein_coding
chr1	222113001	222114001		2079	4196	ENSRNOG00000024931	-	0	0	0	1	1	6.76e-05	0.000226589	16.6997	1000	Ccdc88b	Rps6ka4	protein_coding
chr13	110028001	110029001		17637	20992	ENSRNOG00000003915	+	0	0	0	0	1	2.61e-06	1.31e-05	16.682	1000	Pacc1	Tmem206	protein_coding
chr1	90692001	90693001		868	-6745	ENSRNOG00000022919	-	0	0	0	0	0	4.28e-05	0.000152583	16.5572	1000	Chst8	Chst8	protein_coding
chr7	107775001	107776001		10692	0	ENSRNOG00000007393	-	1	0	1	1	1	7.61e-14	2.18e-12	16.5448	1000	Ndrg1	Ndrg1	protein_coding
chr13	55861001	55862001		17231	16095	ENSRNOG00000010357	-	0	1	0	1	1	1e-10	1.45e-09	16.4583	1000	Lhx9	Spg7	protein_coding
chr9	17212001	17213001		12829	0	ENSRNOG00000022934	-	0	0	1	1	1	6.05e-08	4.54e-07	16.433	1000	AABR07066818.1	Mad2l1bp	protein_coding
chr1	101442001	101443001		1020	5437	ENSRNOG00000036301	-	0	0	0	1	1	6.46e-07	3.81e-06	16.2598	1000	AC128792.1	Ftl1	miRNA
chr1	165043001	165044001		1431	34090	ENSRNOG00000018394	+	0	0	0	0	0	1.99e-14	6.75e-13	16.2113	1000	Chrdl2	Chrdl2	protein_coding
chr1	225049001	225050001		2127	853	ENSRNOG00000026302	+	0	1	1	1	0	2.31e-06	1.18e-05	16.0508	1000	Lrrn4cl	Lrrn4cl	protein_coding
chr10	55676001	55677001		14189	427	ENSRNOG00000006989	+	0	0	1	1	1	1.23e-12	2.69e-11	16.0269	1000	Vamp2	Vamp2	protein_coding
chr3	12847001	12848001		4345	-22474	ENSRNOG00000017172	+	0	0	0	0	1	6.63e-07	3.9e-06	15.9677	1000	Mvb12b	Mvb12b	protein_coding
chr11	88091001	88092001		15967	757	ENSRNOG00000001861	-	0	1	1	1	1	1.09e-19	1.11e-17	15.8806	1000	Ydjc	Ydjc	protein_coding
chr1	165042001	165043001		1430	33090	ENSRNOG00000018394	+	0	0	0	0	0	2.93e-07	1.88e-06	15.8249	1000	Chrdl2	Chrdl2	protein_coding
chr15	28732001	28733001		18687	514	ENSRNOG00000013287	-	0	0	1	1	1	0.000150748	0.000452847	15.722	1000	Sall2	Mettl3	protein_coding
chr19	54117001	54118001		21847	5541	ENSRNOG00000057071	+	0	0	0	0	1	2.27e-05	8.75e-05	15.7056	1000	AABR07044054.1	Gins2	miRNA
chr1	64163001	64164001		359	330	ENSRNOG00000056098	+	0	0	1	1	1	8.62e-09	7.92e-08	15.6844	1000	Tfpt	Tfpt	protein_coding
chr3	82870001	82871001		4782	-13831	ENSRNOG00000055564	-	0	0	0	0	0	4.14e-10	5.2e-09	15.6212	1000	RGD1564664	RGD1564664	protein_coding
chr9	111264001	111265001		13464	-14496	ENSRNOG00000011613	+	0	0	0	1	1	0.000316616	0.000855366	15.5457	1000	Ppip5k2	Gin1	protein_coding
chrX	156228001	156229001		23106	172	ENSRNOG00000060839	+	0	0	1	1	1	1.69e-38	3.21e-35	15.5264	1000	LOC690348	Olr1768	protein_coding
chr12	6271001	6272001		16070	5254	ENSRNOG00000000904	+	0	0	0	0	1	5.15e-08	3.94e-07	15.5168	1000	Wdr95	Hsph1	protein_coding
chr1	93926001	93927001		906	22188	ENSRNOG00000014163	-	0	0	0	0	1	3.57e-10	4.56e-09	15.497	1000	Zfp536	Uri1	protein_coding
chr16	19873001	19874001		19336	-35	ENSRNOG00000017552	+	0	0	1	0	0	1.82e-11	3.07e-10	15.4647	1000	Mrpl34	Mrpl34	protein_coding
chr19	25119001	25120001		21481	-129	ENSRNOG00000052637	+	0	0	1	0	0	3.82e-34	3.92e-31	15.3854	1000	Samd1	Mir1199	protein_coding
chr19	39230001	39231001		21669	248	ENSRNOG00000020351	+	1	0	1	1	1	5.98e-19	5.08e-17	15.3772	1000	Vps4a	Vps4a	protein_coding
chr13	73638001	73639001		17306	0	ENSRNOG00000003882	-	1	0	1	1	0	1.28e-19	1.25e-17	15.3553	1000	Cep350	Tor1aip1	protein_coding
chr10	107594001	107595001		15316	-54344	ENSRNOG00000003386	-	0	0	0	0	0	2.46e-06	1.24e-05	15.3411	1000	Rbfox3	Rbfox3	protein_coding
chr3	162862001	162863001		5480	9832	ENSRNOG00000006052	-	0	0	0	0	1	5.51e-06	2.52e-05	15.3365	1000	Sulf2	Sulf2	protein_coding
chr17	26858001	26859001		20223	-8533	ENSRNOG00000056603	-	0	0	0	0	0	3.02e-05	0.000112596	15.33	1000	AABR07027371.1	Bloc1s5	lincRNA
chr7	24311001	24312001		10172	1886	ENSRNOG00000005758	-	0	0	0	0	1	4.18e-08	3.26e-07	15.3124	1000	Btbd11	Cry1	protein_coding
chr19	55520001	55521001		21901	-9542	ENSRNOG00000053038	-	0	0	0	0	0	5.99e-05	0.000204373	15.2564	1000	AC134009.1	Cbfa2t3	pseudogene
chr11	50780001	50781001		15650	-128	ENSRNOG00000001989	+	0	0	1	0	0	5.36e-12	1.04e-10	15.2292	1000	Alcam	Alcam	protein_coding
chr18	65155001	65156001		21099	0	ENSRNOG00000012405	+	1	0	1	1	0	3.35e-12	6.76e-11	15.2174	1000	Tcf4	Tcf4	protein_coding
chr1	78735001	78736001		498	0	ENSRNOG00000016145	+	1	0	1	1	0	4.87e-13	1.15e-11	15.2155	1000	Strn4	Hspa14	protein_coding
chr20	23098001	23099001		22495	24501	ENSRNOG00000060235	+	0	0	0	0	0	5.99e-05	0.000204445	15.1944	1000	AABR07044837.2	Reep3	lincRNA
chr5	157519001	157520001		8293	-371	ENSRNOG00000049761	-	0	0	1	0	0	3.61e-21	4.82e-19	15.1782	1000	Htr6	Htr6	protein_coding
chr8	59889001	59890001		11862	-10652	ENSRNOG00000015201	+	0	0	0	0	0	1.34e-07	9.24e-07	15.1625	1000	Tmem266	Tmem266	protein_coding
chr16	21087001	21088001		19462	1509	ENSRNOG00000049949	-	0	0	0	1	1	6.72e-08	5.01e-07	15.1502	1000	Hapln4	Hapln4	protein_coding
chr15	52556001	52557001		18939	-608	ENSRNOG00000014010	+	0	0	1	0	0	1.52e-20	1.83e-18	15.0767	1000	Gfra2	Gfra2	protein_coding
chr10	110579001	110580001		15443	4376	ENSRNOG00000036661	-	0	0	0	0	1	7.21e-05	0.000239871	15.0599	1000	Rab40b	Rab40b	protein_coding
chr10	84265001	84266001		14711	-28145	ENSRNOG00000049762	-	0	0	0	0	0	1.25e-05	5.19e-05	15.03	1000	AABR07030395.1	Skap1	miRNA
chr8	94687001	94688001		12200	64	ENSRNOG00000010004	+	0	0	1	1	1	1.27e-16	6.91e-15	15.028	1000	Ripply2	Depdc7	protein_coding
chr12	41486001	41487001		16674	0	ENSRNOG00000037720	+	1	0	1	1	1	1.33e-05	5.48e-05	15.0226	1000	Rita1	Rita1	protein_coding
chr12	2157001	2158001		16030	-6013	ENSRNOG00000000988	+	0	1	0	1	0	0.000577269	0.00144591	14.9521	1000	Xab2	Xab2	protein_coding
chr12	22709001	22710001		16353	675	ENSRNOG00000029211	-	0	0	1	1	1	4.65e-08	3.59e-07	14.9123	1000	Mogat3	Mir702	protein_coding
chr17	86164001	86165001		20588	-34624	ENSRNOG00000016902	+	0	0	0	0	0	2.73e-10	3.61e-09	14.9117	1000	Ptf1a	Ptf1a	protein_coding
chr5	164962001	164963001		8437	-2151	ENSRNOG00000009217	-	0	0	1	0	0	2.79e-05	0.000105035	14.9015	1000	Fbxo6	Fbxo6	protein_coding
chr13	35047001	35048001		17040	445	ENSRNOG00000007261	-	0	0	1	0	1	1.5e-11	2.6e-10	14.8977	1000	Gli2	Gli2	protein_coding
chr2	210991001	210992001		3756	0	ENSRNOG00000052232	-	1	0	1	1	1	3.27e-14	1.05e-12	14.8892	1000	Cyb561d1	Cyb561d1	protein_coding
chr10	85443001	85444001		14747	-7986	ENSRNOG00000055533	-	0	0	0	1	1	1.76e-13	4.67e-12	14.8825	1000	AABR07030435.1	Srcin1	protein_coding
chr1	115351001	115352001		1124	17023	ENSRNOG00000055881	+	0	0	0	0	0	2.03e-06	1.06e-05	14.8645	1000		Gtf2a1	snoRNA
chr8	47706001	47707001		11712	31648	ENSRNOG00000021771	+	0	0	0	0	0	0.00357602	0.00702445	14.8533	1000	Trim29	Trim29	protein_coding
chr17	70366001	70367001		20461	31770	ENSRNOG00000028168	-	0	0	0	0	0	4.87e-07	2.97e-06	14.8445	1000	Ankrd16	Ankrd16	protein_coding
chr12	50146001	50147001		16913	55538	ENSRNOG00000025612	+	0	0	0	0	1	0.000232503	0.000656363	14.7904	1000	Sez6l	Sez6l	protein_coding
chr1	220677001	220678001		2002	8458	ENSRNOG00000028743	+	0	1	0	1	0	1.38e-09	1.52e-08	14.7828	1000	Gal3st3	Gal3st3	protein_coding
chr19	10763001	10764001		21325	0	ENSRNOG00000016991	-	1	0	1	1	0	1.03e-07	7.32e-07	14.7548	1000	Arl2bp	Arl2bp	protein_coding
chr9	38048001	38049001		12926	147274	ENSRNOG00000012207	-	0	0	0	1	1	3.22e-07	2.05e-06	14.7285	1000	Dst	Bend6	protein_coding
chr10	11304001	11305001		13637	-1556	ENSRNOG00000055362	+	0	0	1	0	0	0.00016702	0.000494709	14.7049	1000	AABR07029172.2	Ubald1	lincRNA
chr18	28644001	28645001		20821	-8593	ENSRNOG00000032878	+	0	0	0	0	0	4.88e-14	1.47e-12	14.6984	1000	Cxxc5	Cxxc5	protein_coding
chr2	260137001	260138001		4020	-6010	ENSRNOG00000009845	+	0	0	0	1	1	1.93e-07	1.28e-06	14.5954	1000	Acadm	Acadm	protein_coding
chr19	47201001	47202001		21747	439432	ENSRNOG00000012030	+	0	0	0	0	0	5.72e-06	2.6e-05	14.5951	1000	AABR07043897.1	Wwox	protein_coding
chr12	31663001	31664001		16499	-33121	ENSRNOG00000000934	-	0	0	0	0	0	2.42e-08	1.99e-07	14.5921	1000	Piwil1	Piwil1	protein_coding
chr1	185355001	185356001		1578	628	ENSRNOG00000051825	-	0	0	1	0	1	2.33e-06	1.19e-05	14.5897	1000	AABR07005535.1	Rps13	lincRNA
chr19	26193001	26194001		21558	199	ENSRNOG00000004287	-	0	0	1	1	1	1.88e-09	2.01e-08	14.5887	1000	Wdr83	Wdr83	protein_coding
chr9	82647001	82648001		13267	0	ENSRNOG00000019985	+	1	0	1	1	1	1.47e-06	7.97e-06	14.5132	1000	Asic4	Asic4	protein_coding
chr19	11149001	11150001		21334	0	ENSRNOG00000035643	-	0	0	1	1	0	1.05e-05	4.48e-05	14.4818	1000	Mir138-2	Mir138-2	miRNA
chr7	11559001	11560001		9943	2810	ENSRNOG00000029738	+	1	1	0	1	1	1.94e-05	7.62e-05	14.4589	1000	Diras1	Diras1	protein_coding
chr1	104696001	104697001		1092	60013	ENSRNOG00000014530	+	0	0	0	1	1	0.00180258	0.00387967	14.3719	1000	Nav2	Nav2	protein_coding
chr16	20103001	20104001		19362	-5201	ENSRNOG00000059970	+	0	0	0	0	0	1.86e-15	8.1e-14	14.3591	1000	AABR07024869.1	Unc13a	protein_coding
chr5	61621001	61622001		7362	-35508	ENSRNOG00000009761	+	0	0	0	1	1	1.76e-05	7.01e-05	14.3176	1000	Tmod1	Tmod1	protein_coding
chr1	90413001	90414001		853	106013	ENSRNOG00000021137	-	0	0	0	0	0	0.0023847	0.00494657	14.2262	1000	Kctd15	Kctd15	protein_coding
chr2	62886001	62887001		3017	49	ENSRNOG00000022745	-	1	0	1	1	1	5.98e-22	9.38e-20	14.1925	1000	RGD1306502	RGD1306502	protein_coding
chr20	29136001	29137001		22522	47186	ENSRNOG00000045920	-	0	0	0	0	1	3.13e-05	0.000115889	14.1595	1000	Mcu	Mcu	protein_coding
chr20	5866001	5867001		22185	-148	ENSRNOG00000000511	-	0	0	1	0	0	1.68e-06	8.98e-06	14.1581	1000	Srpk1	Srpk1	protein_coding
chr1	78736001	78737001		499	324	ENSRNOG00000016145	+	1	0	1	1	1	2.84e-05	0.000106711	13.9996	1000	Strn4	Fkrp	protein_coding
chr17	17617001	17618001		20141	165259	ENSRNOG00000054482	+	0	0	0	0	0	0.000106991	0.000336605	13.9653	1000	7SK	Rnf144b	misc_RNA
chr19	25620001	25621001		21512	-47823	ENSRNOG00000052707	+	0	0	0	0	1	0.000354038	0.000946117	13.9636	1000	Cacna1a	Cacna1a	protein_coding
chr2	200546001	200547001		3657	-25503	ENSRNOG00000048181	+	0	0	0	0	0	1.94e-19	1.85e-17	13.9619	1000	Zfp697	Zfp697	protein_coding
chr16	21085001	21086001		19461	3509	ENSRNOG00000049949	-	0	0	0	1	1	1.18e-05	4.96e-05	13.961	1000	Hapln4	Hapln4	protein_coding
chr4	113712001	113713001		6411	51533	ENSRNOG00000006784	-	0	0	0	0	0	0.000165979	0.000492061	13.9443	1000	Sema4f	Sema4f	protein_coding
chr3	154044001	154045001		5339	129	ENSRNOG00000024923	+	0	0	1	1	1	6.77e-08	5.03e-07	13.931	1000	Nnat	Nnat	protein_coding
chr8	14847001	14848001		11470	32645	ENSRNOG00000011585	-	0	0	0	0	1	0.00397827	0.00770565	13.9286	1000	Fat3	LOC689840	protein_coding
chr7	130519001	130520001		11084	-12436	ENSRNOG00000052296	+	0	0	0	0	1	1.11e-06	6.19e-06	13.9246	1000	Shank3	Acr	protein_coding
chr4	171374001	171375001		6901	123184	ENSRNOG00000006231	+	0	0	0	1	1	1.77e-06	9.36e-06	13.8511	1000	Ptpro	Ptpro	protein_coding
chr20	10150001	10151001		22325	26351	ENSRNOG00000001174	+	0	0	0	1	1	0.00254585	0.00523122	13.8313	1000	Pde9a	Pde9a	protein_coding
chr18	25218001	25219001		20775	30951	ENSRNOG00000061675	-	0	0	0	1	1	3.47e-05	0.000126756	13.8251	1000	AABR07031674.7	Bin1	lincRNA
chr1	165237001	165238001		1434	0	ENSRNOG00000017079	+	1	0	1	1	0	4.71e-16	2.27e-14	13.7662	1000	Pgm2l1	LOC100912071	protein_coding
chr17	30864001	30865001		20258	420	ENSRNOG00000017083	-	0	1	1	1	0	1.1e-08	9.83e-08	13.7473	1000	Fam50b	Fam50b	protein_coding
chr7	14410001	14411001		10128	7627	ENSRNOG00000056811	+	0	0	0	1	1	9.17e-22	1.37e-19	13.713	1000	AABR07055866.1	Rasal3	miRNA
chr8	87246001	87247001		12166	-51	ENSRNOG00000010895	-	0	0	1	0	0	2.84e-22	4.67e-20	13.7042	1000	Tmem30a	Tmem30a	protein_coding
chr5	58872001	58873001		7294	16229	ENSRNOG00000045843	+	0	0	0	1	0	6.72e-05	0.000225567	13.6993	1000	Rusc2	Tesk1	protein_coding
chr9	82080001	82081001		13234	9164	ENSRNOG00000017757	+	0	0	0	0	0	0.00274079	0.00558959	13.699	1000	AC132020.1	Wnt10a	pseudogene
chr4	168915001	168916001		6887	-163	ENSRNOG00000000024	+	0	0	1	0	1	4.52e-05	0.00015966	13.6341	1000	Hebp1	Hebp1	protein_coding
chr1	14838001	14839001		90	40236	ENSRNOG00000012057	+	0	0	0	0	0	3.82e-06	1.83e-05	13.6237	1000	Olig3	Olig3	protein_coding
chr1	32405001	32406001		189	23918	ENSRNOG00000017930	-	0	0	0	1	1	3.43e-08	2.72e-07	13.6154	1000	Lpcat1	Lpcat1	protein_coding
chr5	148929001	148930001		8040	5904	ENSRNOG00000011927	+	0	0	0	0	1	7.53e-05	0.000249063	13.6134	1000	Sdc3	Sdc3	protein_coding
chr1	91577001	91578001		880	49	ENSRNOG00000011584	-	1	0	1	1	1	9.78e-13	2.2e-11	13.6004	1000	Gpatch1	Gpatch1	protein_coding
chr20	8141001	8142001		22279	-2819	ENSRNOG00000053996	-	0	0	1	0	0	8.43e-06	3.68e-05	13.5766	1000	AABR07044492.1	Pim1	lincRNA
chr14	35577001	35578001		17947	3032	ENSRNOG00000002244	-	0	0	0	0	1	1.42e-09	1.56e-08	13.5204	1000	Pdgfra	Pdgfra	protein_coding
chr1	274518001	274519001		2565	-106225	ENSRNOG00000014779	+	0	0	0	0	1	5.07e-10	6.21e-09	13.5139	1000	Pdcd4	Pdcd4	protein_coding
chr17	29810001	29811001		20254	57065	ENSRNOG00000032215	-	0	0	0	0	1	3.37e-11	5.4e-10	13.509	1000	Cdyl	Cdyl	protein_coding
chr17	5301001	5302001		19922	-9275	ENSRNOG00000042026	+	0	0	0	0	0	5e-06	2.32e-05	13.4945	1000	AABR07026929.1	Spata31d1	protein_coding
chr4	10326001	10327001		5903	2242	ENSRNOG00000012932	-	0	0	0	1	1	9.72e-06	4.18e-05	13.4909	1000	Ccdc146	Fgl2	protein_coding
chr5	169586001	169587001		8593	43341	ENSRNOG00000011550	-	0	0	0	1	1	0.000305917	0.000831005	13.4601	1000	Kcnab2	LOC500594	protein_coding
chr19	52499001	52500001		21799	0	ENSRNOG00000016257	-	1	0	1	1	1	1.03e-20	1.25e-18	13.4103	1000	Cotl1	Cotl1	protein_coding
chr10	5710001	5711001		13590	-176307	ENSRNOG00000032300	-	0	0	0	0	0	2.81e-13	7.1e-12	13.4067	1000	Rpl39l	Grin2a	protein_coding
chr14	104218001	104219001		18386	26485	ENSRNOG00000004888	+	0	0	0	0	1	0.000184256	0.000539529	13.3779	1000	Spred2	Spred2	protein_coding
chr8	47667001	47668001		11711	-6322	ENSRNOG00000021771	+	0	0	0	0	0	0.000202803	0.000584471	13.3679	1000	Trim29	Trim29	protein_coding
chr13	45317001	45318001		17092	823	ENSRNOG00000003866	-	0	0	1	0	1	3.42e-08	2.71e-07	13.3513	1000	Cxcr4	Cxcr4	protein_coding
chr16	71679001	71680001		19728	49343	ENSRNOG00000016423	+	0	1	0	1	0	0.000409131	0.0010735	13.3384	1000	Tacc1	Tacc1	protein_coding
chr14	103311001	103312001		18374	9271	ENSRNOG00000004606	-	0	0	0	0	1	0.00125685	0.0028375	13.3333	1000	Meis1	Meis1	protein_coding
chr5	128501001	128502001		7677	0	ENSRNOG00000008001	+	1	0	1	1	1	2.59e-13	6.63e-12	13.3175	1000	Rab3b	Rab3b	protein_coding
chr12	16123001	16124001		16241	2954	ENSRNOG00000001250	-	0	0	0	0	1	0.000109749	0.000344425	13.2606	1000	Lfng	Lfng	protein_coding
chr19	15839001	15840001		21362	991	ENSRNOG00000011533	-	0	1	1	1	1	3.11e-05	0.000115353	13.2545	1000	Irx3	Irx3	protein_coding
chr14	46678001	46679001		18037	-6	ENSRNOG00000054685	+	0	0	1	0	0	4.18e-09	4.12e-08	13.2384	1000	AABR07015087.1	Rn5-8s	misc_RNA
chr11	34437001	34438001		15585	88932	ENSRNOG00000001686	-	0	0	0	0	1	1.85e-05	7.32e-05	13.2359	1000	Hlcs	Ripply3	protein_coding
chr9	106377001	106378001		13450	-326905	ENSRNOG00000054740	+	0	0	0	0	0	1.24e-14	4.41e-13	13.2132	1000	U6	Nudt12	snRNA
chr3	59775001	59776001		4587	11707	ENSRNOG00000043837	-	0	0	0	0	0	1.11e-08	9.91e-08	13.181	1000	AABR07052525.1	LOC103695172	miRNA
chr1	81885001	81886001		641	-3453	ENSRNOG00000020263	-	0	1	1	1	0	9.78e-13	2.2e-11	13.1688	1000	Atp1a3	Atp1a3	protein_coding
chr13	54167001	54168001		17229	-13946	ENSRNOG00000051971	-	0	0	0	0	0	3.98e-06	1.9e-05	13.1646	1000	U6	Nr5a2	snRNA
chr4	6662001	6663001		5821	102457	ENSRNOG00000009085	+	0	0	0	0	1	0.000201487	0.000581433	13.1588	1000	Prkag2	Prkag2	protein_coding
chr1	141860001	141861001		1261	27228	ENSRNOG00000047000	+	1	0	0	1	1	1.66e-05	6.65e-05	13.1493	1000	Fuom	Zfp710	protein_coding
chr20	14508001	14509001		22416	36773	ENSRNOG00000001304	-	0	0	0	0	1	5.38e-05	0.000186046	13.1459	1000	Bcr	Hmox1	protein_coding
chr13	102663001	102664001		17559	-19779	ENSRNOG00000002309	-	0	0	0	0	0	4.04e-09	4.01e-08	13.1452	1000	Hlx	Hlx	protein_coding
chr10	34215001	34216001		13911	5929	ENSRNOG00000031138	-	0	0	0	1	1	6.44e-07	3.8e-06	13.1388	1000	Irgm	Irgm	protein_coding
chr9	82618001	82619001		13263	-13231	ENSRNOG00000019946	+	0	0	0	1	0	0.000541273	0.00137016	13.1316	1000	Gmppa	Gmppa	protein_coding
chr8	58348001	58349001		11839	245	ENSRNOG00000009014	+	1	0	1	1	1	1.27e-08	1.12e-07	13.108	1000	Slc35f2	Slc35f2	protein_coding
chr2	47716001	47717001		2938	418917	ENSRNOG00000051788	+	0	0	0	0	0	0.000127191	0.000392151	13.0906	1000	U6	Itga1	snRNA
chr18	78180001	78181001		21219	-96469	ENSRNOG00000061786	+	0	0	0	0	0	6.45e-06	2.9e-05	13.0889	1000	AABR07032724.3	Myot	lincRNA
chr5	129756001	129757001		7689	0	ENSRNOG00000008105	+	0	0	1	1	1	1.94e-11	3.24e-10	13.0821	1000	Dmrta2	Dmrta2	protein_coding
chr13	35049001	35050001		17042	-558	ENSRNOG00000007261	-	0	0	1	0	0	9.13e-14	2.57e-12	13.0633	1000	Gli2	Gli2	protein_coding
chr15	83707001	83708001		19011	0	ENSRNOG00000008785	+	1	0	1	1	1	3.6e-10	4.59e-09	13.0465	1000	Klf5	Klf5	protein_coding
chr12	10186001	10187001		16127	-48838	ENSRNOG00000054511	-	0	0	0	0	0	1.55e-05	6.25e-05	13.0429	1000	AABR07035309.1	Gpr12	lincRNA
chr7	31425001	31426001		10258	-287731	ENSRNOG00000008022	+	0	0	0	0	1	1.66e-07	1.12e-06	13.0075	1000	Apaf1	Apaf1	protein_coding
chr9	112127001	112128001		13475	0	ENSRNOG00000048984	+	0	0	1	1	0	6.05e-05	0.000206194	12.9769	1000	AABR07068612.1	Pja2	miRNA
chr20	3849001	3850001		22077	18626	ENSRNOG00000000463	+	0	0	0	1	1	6.83e-05	0.000228804	12.9524	1000	Col11a2	Col11a2	protein_coding
chr19	26123001	26124001		21552	5620	ENSRNOG00000003737	-	0	1	0	1	1	6.2e-06	2.81e-05	12.9043	1000	Best2	Best2	protein_coding
chr5	152333001	152334001		8137	0	ENSRNOG00000015476	+	1	0	1	1	1	2.22e-09	2.32e-08	12.9021	1000	Ubxn11	Ubxn11	protein_coding
chr1	11971001	11972001		73	910	ENSRNOG00000053888	+	0	0	1	0	0	8.27e-30	6.49e-27	12.9006	1000	5_8S_rRNA	Rn5-8s	rRNA
chr1	11907001	11908001		68	-409	ENSRNOG00000051831	-	0	0	1	0	0	1.74e-36	2.32e-33	12.8486	1000	5_8S_rRNA	Rn5-8s	rRNA
chr6	92108001	92109001		9226	12352	ENSRNOG00000038720	-	0	0	0	0	1	0.000160036	0.000477308	12.8357	1000	Cdkl1	Cdkl1	protein_coding
chr2	198041001	198042001		3607	466	ENSRNOG00000021168	+	0	0	1	0	1	2.22e-22	3.9e-20	12.7884	1000	Anp32e	Anp32e	protein_coding
chr12	50273001	50274001		16918	2813	ENSRNOG00000061004	+	0	0	0	1	1	0.000263487	0.000731541	12.764	1000	Asphd2	Asphd2	protein_coding
chr1	48205001	48206001		285	-4680	ENSRNOG00000051780	-	0	0	1	0	1	0.000356316	0.00095125	12.7571	1000	AC129234.1	Igf2r	snoRNA
chrX	135343001	135344001		23063	0	ENSRNOG00000006067	-	1	0	1	1	0	5.03e-10	6.16e-09	12.6821	1000	Aifm1	Aifm1	protein_coding
chr9	15119001	15120001		12768	-46119	ENSRNOG00000014987	+	0	0	0	0	1	0.000666886	0.00164049	12.6694	1000	Mdfi	Mdfi	protein_coding
chr10	63498001	63499001		14381	391	ENSRNOG00000022232	-	0	0	1	1	0	3.19e-07	2.03e-06	12.6117	1000	Bhlha9	Trarg1	protein_coding
chr3	80002001	80003001		4723	33	ENSRNOG00000012568	-	1	0	1	1	1	1.16e-22	2.09e-20	12.606	1000	Madd	Madd	protein_coding
chr14	108878001	108879001		18451	-36785	ENSRNOG00000007049	+	0	0	0	0	1	2.32e-05	8.9e-05	12.595	1000	Bcl11a	Bcl11a	protein_coding
chr20	30886001	30887001		22555	1736	ENSRNOG00000000563	-	1	0	0	1	1	0.000196829	0.000569715	12.5817	1000	Adamts14	Adamts14	protein_coding
chr16	3138001	3139001		19186	178	ENSRNOG00000028380	-	0	0	1	0	1	2.46e-14	8.11e-13	12.5597	1000	Ccdc66	RT1-N2	protein_coding
chr7	143830001	143831001		11344	6781	ENSRNOG00000012208	-	0	0	0	1	1	0.00113185	0.00259476	12.5399	1000	Itgb7	Itgb7	protein_coding
chr10	85698001	85699001		14764	10569	ENSRNOG00000004091	-	0	0	0	1	1	0.00015597	0.000466013	12.5397	1000	Cwc25	Cwc25	protein_coding
chr3	95699001	95700001		4831	-7387	ENSRNOG00000004410	+	0	0	0	0	0	6.52e-06	2.93e-05	12.5348	1000	Pax6	Pax6	protein_coding
chr10	55849001	55850001		14200	1236	ENSRNOG00000007931	-	0	0	1	1	1	5.84e-06	2.66e-05	12.5322	1000	Gucy2d	Gucy2e	protein_coding
chr19	57462001	57463001		21953	21567	ENSRNOG00000018884	-	0	0	0	0	1	2.32e-05	8.91e-05	12.5006	1000	Ttc13	Ttc13	protein_coding
chr18	30024001	30025001		20860	174	ENSRNOG00000020119	+	0	0	1	1	1	3.46e-05	0.000126644	12.4897	1000	Pcdha13	Pcdha12	protein_coding
chr7	130506001	130507001		11082	7803	ENSRNOG00000052296	+	0	0	0	1	1	1.51e-07	1.03e-06	12.4838	1000	Shank3	Shank3	protein_coding
chr10	73364001	73365001		14549	30883	ENSRNOG00000003544	+	0	0	0	0	0	0.00107647	0.00248273	12.4724	1000	Tbx4	Tbx4	protein_coding
chr12	45882001	45883001		16780	-22372	ENSRNOG00000022392	+	0	0	0	1	1	1.71e-05	6.85e-05	12.4526	1000	Hspb8	Hspb8	protein_coding
chr1	135083001	135084001		1214	0	ENSRNOG00000012369	+	1	0	1	1	0	9.22e-14	2.59e-12	12.4274	1000	Fam174b	Chd2	protein_coding
chr9	7464001	7465001		12650	2433	ENSRNOG00000056784	-	0	0	0	0	0	4.59e-05	0.000162017	12.4247	1000	5_8S_rRNA	Vom2r76	rRNA
chr10	31163001	31164001		13894	16895	ENSRNOG00000042980	+	0	0	0	0	1	0.000227281	0.000643748	12.3965	1000	Adam19	Adam19	protein_coding
chr1	105094001	105095001		1098	0	ENSRNOG00000022189	+	1	0	1	1	1	2.31e-05	8.87e-05	12.3871	1000	Htatip2	Htatip2	protein_coding
chr2	250744001	250745001		3959	0	ENSRNOG00000012957	-	1	0	1	1	0	5.59e-40	1.49e-36	12.3805	1000	Sh3glb1	Sh3glb1	protein_coding
chr12	50145001	50146001		16912	54538	ENSRNOG00000025612	+	0	0	0	0	1	6.26e-05	0.000212753	12.3546	1000	Sez6l	Sez6l	protein_coding
chr3	171343001	171344001		5644	-356	ENSRNOG00000050404	-	0	0	1	0	0	1.28e-29	8.15e-27	12.324	1000	Pmepa1	Pmepa1	protein_coding
chr1	216499001	216500001		1884	117423	ENSRNOG00000020532	+	0	0	0	0	1	0.000566521	0.00142353	12.3209	1000	Kcnq1	Cdkn1c	protein_coding
chr6	26987001	26988001		8913	36130	ENSRNOG00000008996	-	0	0	0	0	1	4.74e-06	2.21e-05	12.3122	1000	Dpysl5	Dpysl5	protein_coding
chr3	157147001	157148001		5375	-47696	ENSRNOG00000016744	-	0	0	0	0	0	3.38e-05	0.000124288	12.3007	1000	Chd6	Chd6	protein_coding
chr2	123214001	123215001		3192	-20872	ENSRNOG00000014453	-	0	0	0	0	0	2.38e-06	1.21e-05	12.2741	1000	Anxa5	Anxa5	protein_coding
chr2	140302001	140303001		3248	15341	ENSRNOG00000010799	+	0	0	0	1	1	0.000133781	0.000408689	12.2496	1000	Noct	Noct	protein_coding
chr10	62693001	62694001		14369	4542	ENSRNOG00000014496	-	0	0	0	1	1	5.34e-05	0.000184687	12.2316	1000	Coro6	Coro6	protein_coding
chr14	8258001	8259001		17770	34528	ENSRNOG00000002079	+	0	0	0	0	1	7.31e-05	0.000242941	12.1909	1000	Mapk10	Arhgap24	protein_coding
chr20	44100001	44101001		22635	39271	ENSRNOG00000000599	+	0	0	0	1	1	2.4e-06	1.22e-05	12.1613	1000	Lama4	Lama4	protein_coding
chr6	141035001	141036001		9777	-26575	ENSRNOG00000047308	-	0	0	0	0	0	0.00025176	0.000703521	12.1475	1000	AABR07065778.2	Adam6a	protein_coding
chr9	96812001	96813001		13373	65562	ENSRNOG00000019476	+	0	0	0	1	1	0.000422708	0.00110419	12.1426	1000	Agap1	Agap1	protein_coding
chr15	2399001	2400001		18499	24420	ENSRNOG00000014237	+	0	0	0	0	0	6.34e-05	0.000214936	12.1314	1000	Zfp503	Zfp503	protein_coding
chr3	164516001	164517001		5518	91487	ENSRNOG00000057347	+	0	0	0	0	0	0.000693523	0.00169725	12.1198	1000	Cebpb	Cebpb	protein_coding
chr14	82538001	82539001		18217	-64672	ENSRNOG00000005113	+	0	0	0	0	0	0.000146004	0.000440083	12.1178	1000	Nkx1-1	Uvssa	protein_coding
chr5	848001	849001		6994	0	ENSRNOG00000022709	-	0	0	1	1	0	0.000127928	0.000394056	12.1153	1000	AABR07046657.1	Pi15	processed_pseudogene
chr19	30718001	30719001		21567	-49057	ENSRNOG00000026880	-	0	0	0	0	0	0.00110037	0.00252954	12.1129	1000	Usp38	Gab1	protein_coding
chr15	24344001	24345001		18634	29754	ENSRNOG00000011873	-	0	1	0	1	0	3.88e-05	0.000139395	12.0885	1000	Atg14	Atg14	protein_coding
chr4	7803001	7804001		5876	17225	ENSRNOG00000047709	-	0	0	0	0	0	8.17e-05	0.000266289	12.0808	1000	AABR07059190.1	LOC100909675	snoRNA
chr5	158800001	158801001		8326	-64740	ENSRNOG00000052537	-	0	0	0	0	0	0.00013362	0.000408385	12.079	1000	AABR07050265.1	Igsf21	lincRNA
chr10	6026001	6027001		13591	95704	ENSRNOG00000033942	+	0	0	0	0	1	0.000977533	0.00227779	12.0663	1000	Grin2a	Grin2a	protein_coding
chr8	113603001	113604001		12332	0	ENSRNOG00000012650	+	1	0	1	1	1	2.24e-17	1.44e-15	12.0645	1000	Mrpl3	Mrpl3	protein_coding
chr18	30820001	30821001		20866	0	ENSRNOG00000039461	+	0	0	1	1	0	2.04e-06	1.06e-05	12.0645	1000	Pcdhga3	Pcdhga3	protein_coding
chr14	35583001	35584001		17948	-1971	ENSRNOG00000002244	-	0	0	1	0	0	1.07e-06	6.01e-06	12.0571	1000	Pdgfra	Pdgfra	protein_coding
chrX	27555001	27556001		22851	450372	ENSRNOG00000055600	+	0	0	0	0	0	4.82e-05	0.000169342	12.0539	1000	U6	Frmpd4	snRNA
chr19	25124001	25125001		21484	278	ENSRNOG00000005533	+	0	0	1	1	1	0.000982166	0.00228699	12.0325	1000	LOC686013	Mir1199	protein_coding
chr9	7465001	7466001		12651	1433	ENSRNOG00000056784	-	0	0	0	0	0	0.00230799	0.00480933	12.0046	1000	5_8S_rRNA	Vom2r76	rRNA
chr1	101773001	101774001		1042	0	ENSRNOG00000021046	-	1	0	1	1	1	1.21e-13	3.31e-12	11.9917	1000	Sult2b1	Sult2b1	protein_coding
chr18	16590001	16591001		20739	0	ENSRNOG00000015113	+	1	0	1	1	1	3.29e-09	3.33e-08	11.9773	1000	Mocos	Mocos	protein_coding
chr19	20282001	20283001		21418	134965	ENSRNOG00000014658	+	1	0	0	1	1	0.000575604	0.00144282	11.9596	1000	Zfp423	Zfp423	protein_coding
chr8	70612001	70613001		12010	8753	ENSRNOG00000033496	+	0	0	0	1	1	0.000316694	0.000855404	11.9555	1000	Igdcc4	Dpp8	protein_coding
chr15	34275001	34276001		18752	4354	ENSRNOG00000019438	+	0	0	0	1	1	0.000561624	0.00141282	11.9444	1000	Rnf31	Rnf31	protein_coding
chr11	69985001	69986001		15745	-48140	ENSRNOG00000001797	+	0	0	0	0	1	2.07e-06	1.07e-05	11.9239	1000	Umps	Umps	protein_coding
chr7	99524001	99525001		10662	41127	ENSRNOG00000056796	+	0	0	0	0	0	1.89e-29	1.05e-26	11.9221	1000	5_8S_rRNA	Sqle	rRNA
chr12	23063001	23064001		16363	-41485	ENSRNOG00000028981	-	0	0	0	0	0	0.000224965	0.000638682	11.9155	1000	Myl10	Col26a1	protein_coding
chr7	142820001	142821001		11309	2845	ENSRNOG00000006934	+	0	0	0	0	1	0.00134089	0.00300176	11.9121	1000	Acvr1b	Zfp592	protein_coding
chr3	175721001	175722001		5722	-11537	ENSRNOG00000058983	-	0	0	0	0	0	0.00279462	0.00567855	11.8821	1000	Gata5	Gata5	protein_coding
chr8	63090001	63091001		11924	1010	ENSRNOG00000008680	-	0	0	0	1	1	0.000126437	0.000390524	11.8611	1000	Loxl1	Loxl1	protein_coding
chr6	91118001	91119001		9207	-3887	ENSRNOG00000038735	-	0	0	1	0	0	0.00538664	0.00994403	11.8593	1000	AABR07064702.1	Rps29	processed_pseudogene
chr20	6437001	6438001		22210	39980	ENSRNOG00000001869	+	0	0	0	1	1	0.0024585	0.00507913	11.8333	1000	Rab44	Cpne5	protein_coding
chr17	3769001	3770001		19910	-39192	ENSRNOG00000050796	-	0	0	0	0	0	0.00014249	0.000431245	11.832	1000	AABR07026893.1	Samd5	protein_coding
chr20	1976001	1977001		22010	3102	ENSRNOG00000000774	-	0	1	1	1	1	0.000226092	0.000640927	11.8111	1000	Gabbr1	Gabbr1	protein_coding
chr19	20089001	20090001		21411	-57038	ENSRNOG00000014658	+	0	0	0	0	0	7.04e-09	6.6e-08	11.7966	1000	Zfp423	Zfp423	protein_coding
chr16	82482001	82483001		19834	34528	ENSRNOG00000059470	-	0	0	0	0	0	5.48e-06	2.51e-05	11.7848	1000	7SK	Tubgcp3	misc_RNA
chr16	21050001	21051001		19457	0	ENSRNOG00000048036	+	1	0	1	1	1	4.39e-15	1.71e-13	11.7843	1000	Ncan	Ncan	protein_coding
chr12	5977001	5978001		16062	34786	ENSRNOG00000050533	+	0	0	0	0	0	4.24e-08	3.3e-07	11.7774	1000	AABR07035175.1	Lnc001	miRNA
chr14	92116001	92117001		18347	924	ENSRNOG00000004290	-	0	0	1	0	1	5.51e-10	6.67e-09	11.774	1000	Grb10	Grb10	protein_coding
chr16	79816001	79817001		19795	0	ENSRNOG00000061179	+	0	0	1	1	1	3.21e-11	5.15e-10	11.7126	1000	AABR07026509.1	Cln8	lincRNA
chr1	274309001	274310001		2562	0	ENSRNOG00000014173	+	1	0	1	1	0	2.12e-06	1.1e-05	11.7063	1000	Smc3	Smc3	protein_coding
chr6	99443001	99444001		9307	-14	ENSRNOG00000038480	+	0	0	1	0	0	1.35e-08	1.17e-07	11.6898	1000	Ppp1r36	Ppp1r36	protein_coding
chr3	36404001	36405001		4450	228446	ENSRNOG00000058954	-	0	0	0	0	0	0.00135664	0.00303152	11.6807	1000	AABR07052091.1	LOC499796	lincRNA
chr17	80483001	80484001		20542	-47758	ENSRNOG00000017595	+	0	0	0	0	1	0.000457467	0.00118408	11.6712	1000	Rsu1	Rsu1	protein_coding
chr10	102549001	102550001		15125	26879	ENSRNOG00000024711	-	0	0	0	0	1	0.00176563	0.00381059	11.6708	1000	Sdk2	Sdk2	protein_coding
chr9	70269001	70270001		13165	-40933	ENSRNOG00000054699	+	0	0	0	0	1	0.00102815	0.00238323	11.6326	1000	Fam237a	Adam23	protein_coding
chrX	29825001	29826001		22855	0	ENSRNOG00000029038	-	1	0	1	1	1	1.62e-06	8.68e-06	11.6325	1000	Gemin8	Gemin8	protein_coding
chr5	152050001	152051001		8130	19985	ENSRNOG00000056863	-	0	0	0	0	0	2.84e-08	2.29e-07	11.6313	1000	AABR07050116.1	Rps6ka1	protein_coding
chr3	13168001	13169001		4347	-223508	ENSRNOG00000017172	-	0	0	0	0	0	5.56e-07	3.33e-06	11.6264	1000	Mvb12b	Mvb12b	protein_coding
chrX	44831001	44832001		22894	153	ENSRNOG00000003686	+	1	0	1	1	1	7.47e-08	5.51e-07	11.6086	1000	Tbl1x	Tbl1x	protein_coding
chr16	20807001	20808001		19439	0	ENSRNOG00000048472	-	1	0	1	1	0	3.67e-07	2.3e-06	11.5741	1000	Comp	Comp	protein_coding
chr18	87580001	87581001		21268	0	ENSRNOG00000045740	+	0	0	1	1	1	1.65e-13	4.43e-12	11.5706	1000	Tmx3	Dok6	protein_coding
chr13	73637001	73638001		17305	74	ENSRNOG00000003882	-	1	0	1	1	1	3.3e-06	1.61e-05	11.5584	1000	Cep350	Tor1aip1	protein_coding
chr7	70624001	70625001		10504	5339	ENSRNOG00000025120	-	0	0	0	1	1	2.97e-05	0.000110904	11.5399	1000	Gli1	Gli1	protein_coding
chr10	73336001	73337001		14547	2883	ENSRNOG00000003544	+	1	0	0	1	1	5.63e-11	8.51e-10	11.5232	1000	Tbx4	Tbx4	protein_coding
chr3	142386001	142387001		5178	2724	ENSRNOG00000013133	+	0	1	0	1	0	2.03e-05	7.92e-05	11.5133	1000	Foxa2	Foxa2	protein_coding
chr7	140449001	140450001		11198	4269	ENSRNOG00000061238	-	0	1	0	1	1	1.4e-06	7.66e-06	11.5038	1000	Wnt10b	Wnt10b	protein_coding
chr19	20096001	20097001		21414	-50038	ENSRNOG00000014658	+	0	0	0	0	0	6.72e-10	7.98e-09	11.4815	1000	Zfp423	Zfp423	protein_coding
chr2	1410001	1411001		2668	0	ENSRNOG00000009997	+	1	0	1	1	1	1.51e-10	2.1e-09	11.462	1000	Erap1	Erap1	protein_coding
chr6	26836001	26837001		8909	0	ENSRNOG00000008605	+	1	1	1	1	1	6.13e-11	9.21e-10	11.4614	1000	Ost4	Ost4	protein_coding
chr4	80912001	80913001		6270	-62732	ENSRNOG00000057253	-	0	0	0	0	0	3.59e-05	0.000130786	11.4349	1000	AABR07060560.3	Mir148a	lincRNA
chr4	145440001	145441001		6655	0	ENSRNOG00000009414	+	1	0	1	1	1	9.47e-12	1.74e-10	11.4278	1000	Creld1	Creld1	protein_coding
chrX	11577001	11578001		22792	-70990	ENSRNOG00000034240	+	0	0	0	0	0	0.00343006	0.00677465	11.4255	1000	Bcor	Bcor	protein_coding
chr8	121973001	121974001		12479	0	ENSRNOG00000008981	-	1	0	1	1	0	1.1e-37	1.83e-34	11.4219	1000	Pdcd6ip	Pdcd6ip	protein_coding
chr19	60277001	60278001		22001	172198	ENSRNOG00000032437	+	0	0	0	1	1	0.000302282	0.000822471	11.4188	1000	Pard3	Pard3	protein_coding
chr7	14303001	14304001		10120	0	ENSRNOG00000006770	-	1	0	1	1	0	3.4e-14	1.08e-12	11.4179	1000	Brd4	Brd4	protein_coding
chr15	2799001	2800001		18506	32292	ENSRNOG00000013034	+	0	0	0	0	1	0.0010916	0.00251242	11.4017	1000	Dupd1	Dupd1	protein_coding
chr15	2799001	2800001		18506	32292	ENSRNOG00000013034	+	0	0	0	0	1	0.0010916	0.00251242	11.4017	1000	Dupd1	Dupd1	protein_coding
chr7	60778001	60779001		10409	0	ENSRNOG00000027622	-	1	0	1	1	0	2.72e-25	7.26e-23	11.3818	1000	Slc35e3	Slc35e3	protein_coding
chr16	19874001	19875001		19337	0	ENSRNOG00000017552	+	1	1	1	1	1	4.73e-10	5.86e-09	11.375	1000	Mrpl34	Mrpl34	protein_coding
chr12	39266001	39267001		16610	12593	ENSRNOG00000001309	+	1	0	0	1	1	0.000177165	0.000521514	11.3679	1000	Camkk2	Camkk2	protein_coding
chr19	42920001	42921001		21703	0	ENSRNOG00000014452	-	0	0	1	1	0	0.000766757	0.00184833	11.351	1000	Zfhx3	Glg1	protein_coding
chr10	86684001	86685001		14804	3731	ENSRNOG00000009329	-	0	1	0	1	1	2.36e-05	9.03e-05	11.3338	1000	Nr1d1	Nr1d1	protein_coding
chr6	123578001	123579001		9516	-307	ENSRNOG00000004709	-	0	0	1	0	0	3.13e-13	7.85e-12	11.3237	1000	Foxn3	Foxn3	protein_coding
chr10	95509001	95510001		15041	-49769	ENSRNOG00000055516	-	0	0	0	0	0	0.00395951	0.00767711	11.3135	1000	Gm24696	RGD1359290	snoRNA
chr9	10441001	10442001		12692	0	ENSRNOG00000033473	-	0	1	1	1	1	9.16e-25	2.3e-22	11.312	1000	Rpl36	Rpl36	protein_coding
chr3	56864001	56865001		4544	1311	ENSRNOG00000000007	+	0	0	1	0	1	0.000181326	0.000531886	11.2881	1000	Gad1	Gad1	protein_coding
chr10	89078001	89079001		14874	5886	ENSRNOG00000020238	-	0	0	0	1	1	7.66e-07	4.43e-06	11.2758	1000	Plekhh3	Plekhh3	protein_coding
chr18	27658001	27659001		20799	374	ENSRNOG00000019422	+	0	0	1	1	1	0.000624799	0.00154724	11.2611	1000	Egr1	Egr1	protein_coding
chr11	74626001	74627001		15814	166674	ENSRNOG00000001717	-	0	0	0	0	0	1.03e-06	5.8e-06	11.2448	1000	Opa1	Opa1	protein_coding
chr12	17151001	17152001		16267	34680	ENSRNOG00000001284	-	0	0	0	0	0	1.84e-05	7.3e-05	11.2372	1000	Uncx	Uncx	protein_coding
chr6	77509001	77510001		9166	-417	ENSRNOG00000022970	-	0	0	1	0	0	2.45e-07	1.59e-06	11.2355	1000	Nkx2-8	Nkx2-8	protein_coding
chr10	73395001	73396001		14550	61883	ENSRNOG00000003544	+	0	0	0	0	0	0.00021258	0.000608434	11.229	1000	Tbx4	Tbx4	protein_coding
chr4	68483001	68484001		6196	0	ENSRNOG00000011509	+	1	0	1	1	1	1.2e-17	8.1e-16	11.2191	1000	Agk	Agk	protein_coding
chr13	92569001	92570001		17457	0	ENSRNOG00000061764	+	0	0	1	1	0	7.49e-12	1.41e-10	11.2049	1000	AABR07021812.1	Olr1602	protein_coding
chr8	65611001	65612001		11949	0	ENSRNOG00000012438	+	1	0	1	1	1	7.17e-10	8.46e-09	11.19	1000	Larp6	Larp6	protein_coding
chr10	91174001	91175001		14950	11055	ENSRNOG00000003033	-	0	0	0	1	1	1.95e-05	7.64e-05	11.1807	1000	Plcd3	Plcd3	protein_coding
chr10	46875001	46876001		14090	-30116	ENSRNOG00000028341	+	0	0	0	1	1	7.56e-11	1.12e-09	11.1516	1000	Alkbh5	Alkbh5	protein_coding
chr10	108395001	108396001		15351	0	ENSRNOG00000047656	+	1	0	1	1	0	3.55e-18	2.59e-16	11.1463	1000	Gaa	Gaa	protein_coding
chr10	46145001	46146001		14065	0	ENSRNOG00000021657	-	1	0	1	1	1	9.92e-14	2.76e-12	11.1423	1000	Pld6	Flcn	protein_coding
chr19	54131001	54132001		21848	19541	ENSRNOG00000057071	+	0	0	0	0	1	0.000129676	0.000398706	11.1314	1000	AABR07044054.1	Gins2	miRNA
chr3	172385001	172386001		5666	0	ENSRNOG00000047374	+	1	0	1	1	1	0.00257747	0.0052905	11.1213	1000	Gnas	Gnas	protein_coding
chr11	67037001	67038001		15713	0	ENSRNOG00000002289	-	1	0	1	1	0	8.74e-06	3.81e-05	11.1025	1000	Ildr1	Ildr1	protein_coding
chr2	23110001	23111001		2748	-12392	ENSRNOG00000050343	-	0	0	0	0	0	0.00142533	0.00316003	11.0921	1000	Jmy	Bhmt	protein_coding
chr13	108567001	108568001		17613	33243	ENSRNOG00000053904	-	0	0	0	0	0	5.19e-05	0.000180364	11.0911	1000	AABR07022113.1	Smyd2	lincRNA
chr5	131275001	131276001		7695	-5078	ENSRNOG00000045298	-	0	0	0	1	1	3.14e-05	0.000116361	11.0809	1000	5S_rRNA	Bend5	rRNA
chr20	4045001	4046001		22080	-238	ENSRNOG00000032708	+	0	0	1	1	1	7.94e-11	1.17e-09	11.0778	1000	RT1-Bb	LOC688090	protein_coding
chr1	276009001	276010001		2578	2352	ENSRNOG00000013993	-	0	0	0	0	0	1.79e-05	7.11e-05	11.0748	1000	AABR07007000.1	Tectb	protein_coding
chr2	249968001	249969001		3949	263296	ENSRNOG00000009205	-	0	0	0	0	0	9e-06	3.9e-05	11.0688	1000	Lmo4	Lmo4	protein_coding
chr1	71383001	71384001		401	-9397	ENSRNOG00000022129	-	0	0	0	1	1	2.45e-11	4.02e-10	11.0608	1000	Galp	Galp	protein_coding
chr14	79635001	79636001		18158	0	ENSRNOG00000061069	-	0	0	1	1	1	0.000645587	0.00159192	11.0564	1000	AABR07015838.2	Psapl1	miRNA
chr9	119156001	119157001		13542	33699	ENSRNOG00000015906	-	0	1	0	1	1	6.48e-05	0.000218588	11.0563	1000	Tgif1	Tgif1	protein_coding
chr5	168769001	168770001		8536	-34706	ENSRNOG00000018602	-	0	0	0	0	1	0.00010126	0.000320498	11.0419	1000	Camta1	Camta1	protein_coding
chr20	5547001	5548001		22166	850	ENSRNOG00000000483	+	0	0	1	1	1	9.6e-05	0.000306317	11.0382	1000	Syngap1	Syngap1	protein_coding
chr9	64611001	64612001		13120	-31282	ENSRNOG00000016012	+	0	0	0	0	0	8.06e-06	3.54e-05	11.0373	1000	Spats2l	Boll	protein_coding
chr10	64930001	64931001		14421	0	ENSRNOG00000048453	+	0	0	1	1	1	1.11e-05	4.7e-05	11.0345	1000	AABR07030053.1	Sez6	protein_coding
chr5	118348001	118349001		7589	-69800	ENSRNOG00000009045	+	0	0	0	0	0	1.3e-23	2.71e-21	11.0189	1000	Alg6	Alg6	protein_coding
chr7	123773001	123774001		10947	-5205	ENSRNOG00000009585	-	0	0	0	0	0	7.98e-13	1.83e-11	11.0084	1000	Tcf20	Tcf20	protein_coding
chr18	14633001	14634001		20714	-97713	ENSRNOG00000029958	+	0	0	0	1	1	0.000883866	0.0020891	10.9895	1000	RGD1563861	Mapre2	processed_pseudogene
chr13	49969001	49970001		17141	859	ENSRNOG00000060611	-	0	0	1	0	1	8.41e-06	3.67e-05	10.9894	1000	AABR07020979.1	Ppp1r15b	lincRNA
chr15	33773001	33774001		18737	1110	ENSRNOG00000025589	-	0	0	0	1	1	3.45e-13	8.46e-12	10.9667	1000	Jph4	Jph4	protein_coding
chr20	3549001	3550001		22057	-2930	ENSRNOG00000057125	+	0	0	1	0	0	0.000301315	0.000820176	10.961	1000	Ddr1	Ddr1	protein_coding
chr9	12888001	12889001		12749	147117	ENSRNOG00000011321	+	0	0	0	1	1	0.00541451	0.00998166	10.9578	1000	Rftn1	Rftn1	protein_coding
chr20	14266001	14267001		22410	15874	ENSRNOG00000001302	-	0	1	0	1	1	2.45e-05	9.35e-05	10.9521	1000	Adora2a	Adora2a	protein_coding
chr5	79316001	79317001		7479	111	ENSRNOG00000001700	-	1	0	1	1	1	0.00204152	0.00432417	10.9394	1000	Whrn	Whrn	protein_coding
chr10	67035001	67036001		14465	29997	ENSRNOG00000035658	-	0	0	0	1	1	0.000368983	0.000980358	10.9334	1000	Mir193a	Mir193	miRNA
chr8	116884001	116885001		12404	-3828	ENSRNOG00000056737	-	0	0	1	1	0	5.82e-05	0.000199381	10.9249	1000	AC128059.4	Apeh	miRNA
chr1	78681001	78682001		495	4953	ENSRNOG00000034106	-	0	0	0	1	1	0.00264918	0.00542017	10.9173	1000	AC127887.1	Ap2s1	protein_coding
chr10	88266001	88267001		14839	0	ENSRNOG00000014819	-	1	0	1	1	0	5.35e-14	1.58e-12	10.9107	1000	Hap1	Hap1	protein_coding
chr5	128923001	128924001		7680	0	ENSRNOG00000010299	+	0	0	1	1	1	1.78e-39	3.95e-36	10.8754	1000	Eps15	Igf1r	protein_coding
chr2	30633001	30634001		2848	0	ENSRNOG00000052167	-	1	0	1	1	1	5.8e-28	2.47e-25	10.8726	1000	Marveld2	Marveld2	protein_coding
chr1	101202001	101203001		1002	-3201	ENSRNOG00000025378	-	0	0	1	0	0	5.99e-10	7.18e-09	10.8571	1000	Ccdc155	Dkkl1	protein_coding
chr7	141249001	141250001		11253	0	ENSRNOG00000051970	+	1	0	1	1	1	3.67e-05	0.00013305	10.856	1000	Aqp5	Aqp5	protein_coding
chr5	166561001	166562001		8485	27821	ENSRNOG00000016398	+	0	0	0	0	1	0.000251185	0.000702209	10.8452	1000	Clstn1	Clstn1	protein_coding
chr18	71300001	71301001		21137	-94831	ENSRNOG00000018359	+	0	0	0	0	1	0.00417487	0.00801315	10.8244	1000	Smad7	Smad7	protein_coding
chr7	120261001	120262001		10838	-1055	ENSRNOG00000055700	+	0	0	1	0	1	1.04e-07	7.41e-07	10.8031	1000	AC096473.3	H1f0	protein_coding
chr5	138183001	138184001		7801	18522	ENSRNOG00000007284	+	0	0	0	0	0	6.1e-05	0.000207882	10.8025	1000	Slc2a1	Slc2a1	protein_coding
chr10	48056001	48057001		14115	-11658	ENSRNOG00000002724	-	0	0	0	1	1	0.000608808	0.00151325	10.8	1000	Prpsap2	Prpsap2	protein_coding
chr14	86195001	86196001		18307	0	ENSRNOG00000014785	+	1	0	1	1	0	5.13e-05	0.0001784	10.7983	1000	Ykt6	Ykt6	protein_coding
chr6	72793001	72794001		9139	-6172	ENSRNOG00000006727	-	0	0	0	0	0	0.00288701	0.00583515	10.7816	1000	Dtd2	Dtd2	protein_coding
chr9	11067001	11068001		12733	2397	ENSRNOG00000047306	+	0	1	0	1	1	0.000195547	0.000566498	10.777	1000	Stap2	Stap2	protein_coding
chr1	197840001	197841001		1658	572	ENSRNOG00000018462	+	0	0	1	1	1	2.59e-05	9.84e-05	10.7692	1000	Rabep2	Rabep2	protein_coding
chr10	82829001	82830001		14644	5084	ENSRNOG00000004155	+	0	0	0	1	1	2.02e-05	7.88e-05	10.7609	1000	Samd14	Samd14	protein_coding
chr3	165712001	165713001		5553	-11513	ENSRNOG00000042101	-	0	0	0	0	0	0.00181194	0.00389541	10.7602	1000	Zfp93	Zfp93	protein_coding
chr18	64561001	64562001		21097	49423	ENSRNOG00000048770	+	0	0	0	0	0	0.00482362	0.00906654	10.7425	1000	AABR07032413.1	Mc2r	miRNA
chr4	85142001	85143001		6300	31932	ENSRNOG00000010629	-	0	0	0	1	0	2.86e-07	1.84e-06	10.7418	1000	Nod1	Nod1	protein_coding
chr7	65223001	65224001		10451	19071	ENSRNOG00000042460	-	0	0	0	0	1	0.00519925	0.0096596	10.7176	1000	Hmga2	Hmga2	protein_coding
chr10	11122001	11123001		13625	8549	ENSRNOG00000004146	-	0	0	0	1	1	3.85e-05	0.000138637	10.714	1000	Coro7	Vasn	protein_coding
chr2	161564001	161565001		3350	0	ENSRNOG00000060947	+	0	0	1	1	0	1.31e-05	5.38e-05	10.7051	1000	5_8S_rRNA	Shox2	rRNA
chr7	137980001	137981001		11143	58631	ENSRNOG00000005291	-	0	0	0	1	1	0.000487568	0.00125083	10.6968	1000	Slc38a1	Slc38a1	protein_coding
chr8	107193001	107194001		12267	-552	ENSRNOG00000017190	+	0	0	1	0	0	1.97e-05	7.72e-05	10.6923	1000	Foxl2	Faim	protein_coding
chr14	77707001	77708001		18128	-4241	ENSRNOG00000006876	+	0	0	1	0	0	0.00106047	0.00245135	10.6412	1000	Msx1	Msx1	protein_coding
chr17	1423001	1424001		19899	117986	ENSRNOG00000019175	+	0	0	0	0	0	0.0015478	0.00339263	10.6401	1000	Ercc6l2	Hsd17b3	protein_coding
chr6	24286001	24287001		8877	-127	ENSRNOG00000056521	+	0	0	1	0	0	8.47e-05	0.000274418	10.6375	1000	AABR07063250.1	Lbh	miRNA
chr17	31440001	31441001		20263	-631	ENSRNOG00000017445	+	0	0	1	0	0	1.96e-06	1.02e-05	10.6335	1000	Tubb2b	Tubb2b	protein_coding
chr15	34252001	34253001		18748	396	ENSRNOG00000019019	+	0	0	1	1	1	0.000383173	0.00101442	10.6261	1000	Fitm1	Fitm1	protein_coding
chr13	51815001	51816001		17181	19135	ENSRNOG00000005038	+	0	0	0	1	0	1.1e-05	4.65e-05	10.5958	1000	Ube2t	Ube2t	protein_coding
chr16	4468001	4469001		19198	-469	ENSRNOG00000015618	+	0	0	1	0	0	1.48e-14	5.19e-13	10.5747	1000	Wnt5a	Wnt5a	protein_coding
chr19	59873001	59874001		21997	0	ENSRNOG00000019980	-	1	0	1	1	1	1.05e-16	5.81e-15	10.5558	1000	Tomm20	Tomm20	protein_coding
chr19	37246001	37247001		21612	-785	ENSRNOG00000015625	-	0	0	1	1	1	0.000415425	0.0010875	10.5312	1000	MGC116202	Kiaa0895l	protein_coding
chr2	232021001	232022001		3860	58485	ENSRNOG00000010972	+	0	0	0	1	1	3.71e-09	3.7e-08	10.5278	1000	Neurog2	Tifa	protein_coding
chr7	11308001	11309001		9919	6045	ENSRNOG00000020501	+	0	0	0	1	1	5.52e-05	0.000190431	10.5246	1000	Tjp3	Tjp3	protein_coding
chr4	148199001	148200001		6689	0	ENSRNOG00000011791	+	1	0	1	1	1	6.43e-11	9.6e-10	10.5213	1000	Zfand4	Zfand4	protein_coding
chr4	161906001	161907001		6854	768	ENSRNOG00000007247	-	0	0	1	1	1	0.000673523	0.0016556	10.5162	1000	A2ml1	Pzp	protein_coding
chr3	3593001	3594001		4106	476	ENSRNOG00000042501	-	0	0	1	0	1	7.5e-16	3.46e-14	10.5118	1000	Tmem250	Tmem250	protein_coding
chrX	74361001	74362001		22958	10284	ENSRNOG00000018301	-	0	0	0	0	0	4.13e-07	2.55e-06	10.5112	1000	AABR07039356.1	LOC100911498	processed_pseudogene
chr8	56683001	56684001		11827	12524	ENSRNOG00000012470	-	0	0	0	0	1	0.00306536	0.00615551	10.4914	1000	Zc3h12c	Zc3h12c	protein_coding
chr6	99434001	99435001		9306	430	ENSRNOG00000006472	+	0	0	1	1	1	1.06e-07	7.53e-07	10.4832	1000	Hspa2	Hspa2	protein_coding
chr14	47675001	47676001		18040	-299912	ENSRNOG00000061258	-	0	0	0	0	0	1.53e-09	1.67e-08	10.4799	1000	U6	Wdr82	snRNA
chr7	126519001	126520001		11008	-53279	ENSRNOG00000015750	-	0	0	0	0	0	1.49e-06	8.09e-06	10.4713	1000	Wnt7b	Wnt7b	protein_coding
chrX	32354001	32355001		22860	297	ENSRNOG00000038686	-	0	0	1	0	1	1.95e-12	4.1e-11	10.4624	1000	Ap1s2	Ap1s2	protein_coding
chr13	36533001	36534001		17066	244	ENSRNOG00000056580	+	0	0	1	1	1	1.32e-08	1.15e-07	10.4405	1000	En1	C1ql2	protein_coding
chr20	11855001	11856001		22368	-7083	ENSRNOG00000001225	+	0	0	0	0	0	0.000701717	0.00171322	10.4383	1000	Fam207a	Fam207a	protein_coding
chr8	123462001	123463001		12511	-39093	ENSRNOG00000055151	-	0	0	0	0	0	0.000544002	0.00137524	10.4369	1000	SNORD34	Stt3b	snoRNA
chr10	89352001	89353001		14887	0	ENSRNOG00000020674	+	1	0	1	1	1	1.03e-10	1.49e-09	10.4341	1000	Rpl27	Rpl27	protein_coding
chr3	164987001	164988001		5531	581	ENSRNOG00000025067	+	0	1	1	1	0	4.94e-08	3.79e-07	10.4233	1000	Mocs3	Mocs3	protein_coding
chr7	75749001	75750001		10559	59837	ENSRNOG00000060956	-	0	0	0	0	0	8.53e-06	3.72e-05	10.4186	1000	Zfp706	Zfp706	protein_coding
chr3	153114001	153115001		5325	0	ENSRNOG00000006236	-	1	0	1	1	1	8.86e-09	8.1e-08	10.4022	1000	Dsn1	Dsn1	protein_coding
chr8	59140001	59141001		11845	-56	ENSRNOG00000059834	-	0	0	1	0	0	4.23e-08	3.3e-07	10.3948	1000	Cib2	Cib2	protein_coding
chr13	95995001	95996001		17469	9347	ENSRNOG00000056537	+	0	0	0	1	1	0.000225492	0.000639633	10.3942	1000	AABR07021863.1	Adss	protein_coding
chr1	84143001	84144001		697	1917	ENSRNOG00000020871	-	0	0	0	0	1	0.00154934	0.0033949	10.3846	1000	Ltbp4	Ltbp4	protein_coding
chr7	66876001	66877001		10464	32471	ENSRNOG00000004314	-	0	0	0	0	1	0.000295802	0.00080665	10.3835	1000	Ppm1h	Mirlet7i	protein_coding
chr10	12981001	12982001		13669	328	ENSRNOG00000003457	+	1	0	1	1	1	7.71e-05	0.00025404	10.3806	1000	Bicdl2	Bicdl2	protein_coding
chr3	161415001	161416001		5447	1592	ENSRNOG00000017539	+	0	0	0	1	1	0.000258242	0.000718475	10.3784	1000	Mmp9	Mmp9	protein_coding
chr2	198521001	198522001		3620	2301	ENSRNOG00000059367	-	0	0	0	0	0	0.00020796	0.00059714	10.3633	1000	U1	Fcgr1a	snRNA
chr8	53436001	53437001		11801	24686	ENSRNOG00000008058	+	0	0	0	0	0	1.42e-06	7.72e-06	10.3413	1000	Tmprss5	Tmprss5	protein_coding
chr7	12831001	12832001		10085	0	ENSRNOG00000008960	-	0	0	1	1	1	6.8e-14	1.98e-12	10.3311	1000	Fgf22	Fgf22	protein_coding
chr10	86803001	86804001		14813	7215	ENSRNOG00000027849	+	0	0	0	1	1	8.55e-05	0.000276706	10.3277	1000	Wipf2	Wipf2	protein_coding
chr3	148428001	148429001		5240	0	ENSRNOG00000008534	-	1	0	1	1	1	1.31e-26	4.15e-24	10.3213	1000	Dusp15	Dusp15	protein_coding
chr16	69078001	69079001		19694	8505	ENSRNOG00000058940	+	0	1	0	1	0	0.00386618	0.00751912	10.299	1000	Rab11fip1	Brf2	protein_coding
chr19	9802001	9803001		21295	-60	ENSRNOG00000012482	-	0	0	1	0	0	1.79e-11	3.04e-10	10.2989	1000	Ndrg4	Ndrg4	protein_coding
chr3	95138001	95139001		4823	4289	ENSRNOG00000013074	+	0	0	0	0	1	0.00277539	0.0056448	10.2929	1000	Wt1	Wt1	protein_coding
chr7	36866001	36867001		10320	39642	ENSRNOG00000021688	+	0	0	0	0	0	0.00398757	0.00771919	10.2873	1000	AABR07056686.1	Nudt4	protein_coding
chr13	86913001	86914001		17396	179875	ENSRNOG00000049253	+	0	0	0	0	0	2.98e-05	0.000111219	10.286	1000	AABR07021706.1	Pbx1	miRNA
chr10	56001001	56002001		14207	-777	ENSRNOG00000009870	-	0	0	1	1	1	4e-11	6.3e-10	10.2804	1000	Tmem88	Tmem88	protein_coding
chr7	11217001	11218001		9899	1674	ENSRNOG00000039861	+	0	1	0	1	1	0.000404697	0.00106359	10.2718	1000	LOC690617	LOC690617	protein_coding
chr8	79040001	79041001		12093	-13238	ENSRNOG00000057867	+	0	0	0	0	0	0.00530771	0.00982551	10.2579	1000	Mns1	Mns1	protein_coding
chr15	42522001	42523001		18836	0	ENSRNOG00000015939	+	1	0	1	1	1	1.73e-23	3.49e-21	10.2571	1000	Ccdc25	Ccdc25	protein_coding
chr5	148221001	148222001		8030	20632	ENSRNOG00000014375	+	0	0	0	1	1	0.00486582	0.00913043	10.2568	1000	Adgrb2	Adgrb2	protein_coding
chr7	140370001	140371001		11194	-12398	ENSRNOG00000058916	+	0	0	0	0	0	0.000808195	0.00193493	10.2439	1000	Ccdc65	Ccdc65	protein_coding
chr16	82477001	82478001		19833	-37561	ENSRNOG00000031681	-	0	0	0	0	0	7.07e-06	3.14e-05	10.2435	1000	AABR07026539.1	Tubgcp3	protein_coding
chr7	144879001	144880001		11407	93	ENSRNOG00000036837	-	1	0	1	1	1	0.00254453	0.00523012	10.2288	1000	Nfe2	Nfe2	protein_coding
chr20	4352001	4353001		22083	-2176	ENSRNOG00000000443	+	0	0	1	1	1	1.18e-11	2.11e-10	10.1967	1000	LOC103689965	Gpsm3	protein_coding
chr14	92117001	92118001		18348	0	ENSRNOG00000004290	-	1	0	1	1	1	7.02e-12	1.33e-10	10.1916	1000	Grb10	Grb10	protein_coding
chr10	35800001	35801001		13931	0	ENSRNOG00000003268	-	1	1	1	1	0	2.51e-16	1.29e-14	10.1851	1000	Maml1	Maml1	protein_coding
chr5	48457001	48458001		7215	245	ENSRNOG00000051383	+	0	0	1	0	1	6.56e-06	2.94e-05	10.1724	1000	Srsf12	Srsf12	protein_coding
chr11	87242001	87243001		15946	0	ENSRNOG00000061814	+	1	0	1	1	1	1.78e-07	1.19e-06	10.1704	1000	Dgcr2	Dgcr2	protein_coding
chr10	64969001	64970001		14422	16883	ENSRNOG00000008798	+	0	0	0	0	0	0.000464	0.00119913	10.1557	1000	Pipox	Pipox	protein_coding
chr10	94231001	94232001		15012	0	ENSRNOG00000042245	+	1	0	1	1	1	1.4e-17	9.43e-16	10.1432	1000	Dcaf7	Dcaf7	protein_coding
chr13	89446001	89447001		17413	-12187	ENSRNOG00000046452	-	0	0	0	0	0	1.92e-17	1.27e-15	10.1368	1000	Fcgr2b	Cfap126	protein_coding
chr5	158549001	158550001		8320	0	ENSRNOG00000049959	-	0	0	1	1	1	0.0029891	0.00602232	10.1288	1000	Igsf21	Igsf21	protein_coding
chr18	16543001	16544001		20737	0	ENSRNOG00000028703	-	1	0	1	1	1	5.95e-22	9.38e-20	10.1163	1000	Slc39a6	Slc39a6	protein_coding
chr10	108199001	108200001		15346	-2785	ENSRNOG00000046207	-	0	0	1	0	0	7.59e-09	7.06e-08	10.1007	1000	Cbx4	Cbx8	protein_coding
chr3	174962001	174963001		5696	-895	ENSRNOG00000057429	-	0	0	1	0	0	0.00293072	0.00591276	10.0954	1000	5S_rRNA	Psma7	rRNA
chr10	55707001	55708001		14194	0	ENSRNOG00000007391	+	1	0	1	1	1	0.000720084	0.00175229	10.087	1000	Hes7	Hes7	protein_coding
chr10	31074001	31075001		13891	0	ENSRNOG00000006098	+	0	0	1	1	1	9.59e-08	6.88e-07	10.0695	1000	Sox30	Thg1l	protein_coding
chr7	99526001	99527001		10664	43127	ENSRNOG00000056796	+	0	0	0	0	0	2.52e-10	3.35e-09	10.0599	1000	5_8S_rRNA	Sqle	rRNA
chr13	80461001	80462001		17345	112	ENSRNOG00000003071	+	0	0	1	0	1	2.48e-13	6.35e-12	10.0457	1000	Vamp4	Vamp4	protein_coding
chr12	41664001	41665001		16683	6438	ENSRNOG00000001392	-	0	0	0	0	1	0.000287358	0.000787973	10.0394	1000	Lhx5	Lhx5	protein_coding
chr8	23189001	23190001		11574	-3182	ENSRNOG00000050600	+	0	0	1	0	0	1.94e-09	2.07e-08	10.0304	1000	Zfp872	LOC100365921	protein_coding
chr1	80090001	80091001		538	-1404	ENSRNOG00000030127	+	1	0	1	1	1	0.00125524	0.00283476	10.0285	1000	Eml2	Mir330	protein_coding
chr7	128540001	128541001		11036	39991	ENSRNOG00000049349	+	0	0	0	0	1	1.04e-06	5.85e-06	10.0244	1000	Tafa5	Tafa5	protein_coding
chr8	60123001	60124001		11872	5273	ENSRNOG00000015336	+	0	0	0	0	0	1.11e-05	4.67e-05	10.0242	1000	Isl2	Isl2	protein_coding
chr5	28851001	28852001		7151	52	ENSRNOG00000007426	+	0	0	1	1	1	1.12e-16	6.15e-15	10.0091	1000	Tmem64	Necab1	protein_coding
chr10	61377001	61378001		14327	-15752	ENSRNOG00000002652	-	0	0	0	0	0	1.16e-05	4.88e-05	10.0038	1000	Rap1gap2	Cluh	protein_coding
chr20	2128001	2129001		22021	-12745	ENSRNOG00000058072	-	0	0	0	0	0	0.000513003	0.00130728	9.98978	1000	LOC102554813	Rnf39	lincRNA
chr8	130630001	130631001		12607	-12169	ENSRNOG00000019492	-	0	0	0	0	0	4.43e-05	0.000157308	9.98846	1000	Pomgnt2	Pomgnt2	protein_coding
chr15	33278001	33279001		18715	-2452	ENSRNOG00000059187	-	0	0	1	1	0	1.79e-06	9.45e-06	9.98816	1000	U6	Psmb11	snRNA
chr4	77448001	77449001		6220	-1378	ENSRNOG00000059013	-	0	0	1	0	0	6.31e-28	2.55e-25	9.96268	1000	AABR07060519.1	Pdia4	lincRNA
chr17	19586001	19587001		20166	-5073	ENSRNOG00000017250	-	0	0	0	0	0	0.000886224	0.00209356	9.95398	1000	Gmpr	Gmpr	protein_coding
chr3	55691001	55692001		4524	-48487	ENSRNOG00000056184	+	0	0	0	0	1	0.00249515	0.0051413	9.95281	1000	Lrp2	Dhrs9	protein_coding
chr18	55864001	55865001		21003	-4669	ENSRNOG00000057139	-	0	0	1	0	0	0.00248835	0.00513026	9.94787	1000	Myoz3	Synpo	protein_coding
chr3	172387001	172388001		5668	1330	ENSRNOG00000047374	+	0	0	0	1	1	3.38e-11	5.4e-10	9.93208	1000	Gnas	Gnas	protein_coding
chrX	26843001	26844001		22846	-171885	ENSRNOG00000004016	+	0	0	0	0	0	0.00508955	0.0094875	9.92794	1000	Msl3	Msl3	protein_coding
chr10	75057001	75058001		14572	1982	ENSRNOG00000007957	+	0	0	0	1	1	8.8e-18	6.11e-16	9.91949	1000	Tspoap1	Mir142	protein_coding
chr1	198721001	198722001		1693	0	ENSRNOG00000048397	-	0	0	1	1	1	3.42e-25	8.95e-23	9.90657	1000	Sephs2	Sephs2	pseudogene
chr3	171397001	171398001		5646	-54356	ENSRNOG00000050404	-	0	0	0	0	0	0.000854449	0.00203	9.88757	1000	Pmepa1	Pmepa1	protein_coding
chr14	104212001	104213001		18385	20485	ENSRNOG00000004888	+	0	0	0	0	1	0.000792465	0.00190308	9.87671	1000	Spred2	Spred2	protein_coding
chr13	49136001	49137001		17123	32919	ENSRNOG00000000033	-	0	0	0	1	1	0.00253943	0.00522139	9.87392	1000	Tmcc2	Csnk1g3	protein_coding
chr1	170604001	170605001		1491	-9834	ENSRNOG00000019212	-	0	0	0	1	1	4.3e-10	5.38e-09	9.87226	1000	Tpp1	Tpp1	protein_coding
chr4	183879001	183880001		6990	-16304	ENSRNOG00000036913	+	0	0	0	0	0	1.23e-12	2.69e-11	9.86635	1000	Resf1	Bicd1	protein_coding
chr8	53294001	53295001		11799	-223	ENSRNOG00000007325	+	0	0	1	0	0	1.23e-19	1.22e-17	9.86199	1000	Usp28	Usp28	protein_coding
chr9	43092001	43093001		12977	-139	ENSRNOG00000016032	+	0	0	1	0	0	2.94e-08	2.36e-07	9.82963	1000	Cnnm3	Cnnm3	protein_coding
chr2	25655001	25656001		2786	90118	ENSRNOG00000056427	+	0	0	0	0	0	6.71e-05	0.000225197	9.78658	1000	AABR07007717.1	Arhgef28	lincRNA
chr1	81881001	81882001		640	0	ENSRNOG00000020263	-	1	0	1	1	1	1.46e-08	1.25e-07	9.78444	1000	Atp1a3	Atp1a3	protein_coding
chr20	37887001	37888001		22616	10352	ENSRNOG00000000805	+	0	1	0	1	0	0.00425805	0.00815284	9.77011	1000	Gja1	Gja1	protein_coding
chr19	23406001	23407001		21452	16627	ENSRNOG00000013907	+	0	0	0	0	0	1.22e-05	5.09e-05	9.76626	1000	Sall1	Sall1	protein_coding
chr1	163144001	163145001		1395	3949	ENSRNOG00000014471	-	0	1	0	1	0	6.31e-07	3.73e-06	9.76169	1000	B3gnt6	B3gnt6	protein_coding
chr7	26697001	26698001		10211	-6679	ENSRNOG00000008885	-	0	0	0	0	1	0.000501462	0.00128056	9.75832	1000	Chst11	Chst11	protein_coding
chr5	160501001	160502001		8391	53084	ENSRNOG00000028064	-	0	0	0	1	1	0.00221641	0.00464596	9.74753	1000	Fhad1	Efhd2	protein_coding
chr17	20747001	20748001		20173	80554	ENSRNOG00000057369	-	0	0	0	0	0	0.0020657	0.00436912	9.74711	1000	AABR07027240.1	LOC690414	lincRNA
chr3	8317001	8318001		4184	-1092	ENSRNOG00000046655	-	0	0	1	0	0	1.89e-06	9.94e-06	9.74686	1000	AABR07051395.1	Trub2	protein_coding
chr20	31314001	31315001		22566	984	ENSRNOG00000024839	+	0	0	1	1	1	4.32e-06	2.04e-05	9.74007	1000	Tysnd1	Tysnd1	protein_coding
chr11	86556001	86557001		15918	3980	ENSRNOG00000001892	+	0	0	0	1	1	4.19e-07	2.59e-06	9.72319	1000	Tbx1	Tbx1	protein_coding
chr8	32702001	32703001		11623	-34917	ENSRNOG00000054853	+	0	0	0	0	0	0.0028726	0.00581043	9.70243	1000	AABR07069588.1	Tmem45b	lincRNA
chr20	48336001	48337001		22713	462	ENSRNOG00000000321	+	0	0	1	0	1	1.68e-07	1.14e-06	9.6779	1000	Cd24	Cd24	protein_coding
chr13	71657001	71658001		17286	351	ENSRNOG00000031569	+	0	0	1	1	0	1.69e-06	9.03e-06	9.66947	1000	Zfp648	Glul	protein_coding
chr5	62683001	62684001		7384	0	ENSRNOG00000023309	-	1	0	1	1	1	1.76e-05	7.01e-05	9.6683	1000	Anks6	Anks6	protein_coding
chr20	44608001	44609001		22642	0	ENSRNOG00000051272	-	0	0	1	1	1	0.00258589	0.00530613	9.65043	1000	AABR07045350.1	Traf3ip2	antisense
chr9	17845001	17846001		12854	3592	ENSRNOG00000019958	+	0	0	0	1	0	1.18e-05	4.93e-05	9.6491	1000	Tmem151b	Tmem151b	protein_coding
chr7	20629001	20630001		10151	0	ENSRNOG00000061013	+	0	0	1	1	1	0.00033481	0.000900324	9.64523	1000	AABR07056156.1	Vom2r57	lincRNA
chr20	14430001	14431001		22414	-36209	ENSRNOG00000001303	-	0	0	0	0	1	0.000752634	0.00181856	9.63621	1000	Specc1l	Specc1l	protein_coding
chr14	10771001	10772001		17804	507	ENSRNOG00000043926	+	0	0	1	0	0	0.00027742	0.00076418	9.61048	1000		Lin54	miRNA
chr1	86897001	86898001		765	-16138	ENSRNOG00000019942	+	0	0	0	0	0	0.0001613	0.000480219	9.60765	1000	Fbxo17	Fbxo17	protein_coding
chr20	12225001	12226001		22377	0	ENSRNOG00000001229	+	1	0	1	1	1	2.42e-06	1.23e-05	9.60486	1000	Col18a1	Col18a1	protein_coding
chr7	70842001	70843001		10512	0	ENSRNOG00000025059	-	1	0	1	1	1	1.5e-06	8.13e-06	9.59585	1000	Nxph4	Nxph4	protein_coding
chr11	31396001	31397001		15534	6488	ENSRNOG00000028658	+	0	0	0	0	0	3.44e-05	0.000126113	9.59148	1000	Olig2	Olig2	protein_coding
chr3	122450001	122451001		5047	32804	ENSRNOG00000057575	+	0	0	0	0	0	0.00121984	0.00276888	9.57681	1000	AABR07053717.1	Tgm3	lincRNA
chr5	27286001	27287001		7143	-25929	ENSRNOG00000005673	+	0	0	0	0	0	0.000453751	0.00117571	9.56982	1000	Runx1t1	Runx1t1	protein_coding
chr5	145304001	145305001		7958	-6376	ENSRNOG00000014352	+	0	1	0	1	0	7e-06	3.12e-05	9.56851	1000	Smim12	Smim12	protein_coding
chr1	199669001	199670001		1728	4829	ENSRNOG00000019965	+	0	0	0	1	1	0.00229128	0.00477955	9.54636	1000	Tgfb1i1	Tgfb1i1	protein_coding
chr9	3697001	3698001		12642	0	ENSRNOG00000058626	-	1	0	1	1	1	4.47e-05	0.000158246	9.54562	1000	Kcnh8	Kcnh8	protein_coding
chr3	51054001	51055001		4509	0	ENSRNOG00000052498	-	0	0	1	1	1	1.22e-07	8.51e-07	9.54412	1000	Grb14	Grb14	protein_coding
chr6	4416001	4417001		8750	37929	ENSRNOG00000050879	+	0	0	0	0	1	0.000974217	0.00227086	9.52234	1000	AABR07062708.1	Slc8a1	miRNA
chr19	54698001	54699001		21865	23564	ENSRNOG00000018824	-	0	0	0	1	1	4.69e-05	0.000165095	9.51562	1000	Slc7a5	Slc7a5	protein_coding
chr5	150957001	150958001		8083	0	ENSRNOG00000013005	+	1	0	1	1	1	0.000193078	0.000560253	9.51244	1000	Rpa2	Rpa2	protein_coding
chr18	77312001	77313001		21204	4970	ENSRNOG00000017146	-	0	0	0	0	1	0.00156821	0.0034323	9.50947	1000	Nfatc1	Nfatc1	protein_coding
chr6	58466001	58467001		9097	-255	ENSRNOG00000006867	+	0	0	1	0	0	2.94e-07	1.88e-06	9.5056	1000	Etv1	Etv1	protein_coding
chr10	110626001	110627001		15446	-4495	ENSRNOG00000036659	+	0	0	1	0	0	9.5e-09	8.62e-08	9.50427	1000	Fn3k	Fn3k	protein_coding
chr7	128648001	128649001		11039	113963	ENSRNOG00000046123	-	0	0	0	1	1	0.00451533	0.00858126	9.49593	1000	AABR07058633.1	Tafa5	miRNA
chr20	1974001	1975001		22009	5102	ENSRNOG00000000774	-	0	1	0	1	1	0.00456023	0.00865317	9.46628	1000	Gabbr1	Gabbr1	protein_coding
chr2	25250001	25251001		2784	-14727	ENSRNOG00000018003	-	0	0	0	0	0	0.00315312	0.00630044	9.46524	1000	F2rl1	F2rl1	protein_coding
chr7	120259001	120260001		10836	-3055	ENSRNOG00000055700	+	0	0	1	0	1	7.61e-07	4.41e-06	9.4625	1000	AC096473.3	H1f0	protein_coding
chr4	66900001	66901001		6180	-88	ENSRNOG00000008196	-	0	0	1	0	0	5.69e-28	2.47e-25	9.43286	1000	Parp12	Chmp4bl1	protein_coding
chr2	207239001	207240001		3710	15825	ENSRNOG00000030253	-	0	0	0	0	0	7.19e-19	5.99e-17	9.41073	1000	Tafa3	Ppm1j	protein_coding
chr14	9723001	9724001		17788	61737	ENSRNOG00000057790	-	0	0	0	0	0	0.00311264	0.00623702	9.39362	1000	AABR07014328.1	Nkx6-1	lincRNA
chr13	89439001	89440001		17411	-5187	ENSRNOG00000046452	-	0	0	0	0	0	8.74e-47	1.17e-42	9.39071	1000	Fcgr2b	Cfap126	protein_coding
chr4	7101001	7102001		5834	6836	ENSRNOG00000010466	-	0	0	0	1	1	1.59e-05	6.42e-05	9.37636	1000	Chpf2	Mir671	protein_coding
chr10	62654001	62655001		14366	3283	ENSRNOG00000022615	+	0	0	0	1	1	0.000687019	0.00168319	9.35902	1000	Tp53i13	Tp53i13	protein_coding
chr10	73276001	73277001		14535	-2120	ENSRNOG00000003517	+	0	0	1	0	0	0.000495923	0.00126811	9.35838	1000	Tbx2	Tbx2	protein_coding
chr1	131753001	131754001		1201	64898	ENSRNOG00000054097	+	0	0	0	0	0	0.00112546	0.00258189	9.35789	1000	AABR07004232.2	Nr2f2	lincRNA
chr9	98505001	98506001		13399	0	ENSRNOG00000024688	+	0	0	1	1	1	8.56e-27	2.86e-24	9.3519	1000	Erfe	Ilkap	protein_coding
chr5	159559001	159560001		8348	17135	ENSRNOG00000008334	-	0	0	0	1	1	0.00190679	0.00407372	9.35116	1000	Crocc	Crocc	protein_coding
chr4	98027001	98028001		6347	0	ENSRNOG00000005890	+	1	0	1	1	1	3.91e-07	2.43e-06	9.34291	1000	Serbp1	Serbp1	protein_coding
chr8	79722001	79723001		12105	0	ENSRNOG00000052499	+	1	0	1	1	1	0.00170255	0.00368998	9.33487	1000	Rab27a	Rab27a	protein_coding
chr3	8308001	8309001		4182	6911	ENSRNOG00000046655	-	0	0	0	0	0	0.000104765	0.000330337	9.33382	1000	AABR07051395.1	Trub2	protein_coding
chrX	124766001	124767001		23048	0	ENSRNOG00000000164	-	1	0	1	1	0	9.86e-05	0.000313293	9.33333	1000	Lamp2	Lamp2	protein_coding
chr2	165458001	165459001		3364	-27911	ENSRNOG00000028561	+	0	0	0	0	0	0.00101558	0.00235738	9.3323	1000	AABR07011672.1	Ift80	pseudogene
chr5	139661001	139662001		7831	15301	ENSRNOG00000060435	-	0	0	0	0	1	2.09e-07	1.38e-06	9.32478	1000	Kcnq4	Mir30c1	protein_coding
chr1	174863001	174864001		1532	304	ENSRNOG00000009910	+	0	0	1	0	1	1.52e-09	1.66e-08	9.32057	1000	Swap70	Swap70	protein_coding
chr1	24207001	24208001		146	-13435	ENSRNOG00000011815	-	0	0	0	0	1	4.47e-05	0.000158246	9.31398	1000	Sgk1	Sgk1	protein_coding
chr18	65202001	65203001		21102	46317	ENSRNOG00000012405	+	0	0	0	0	1	0.000294439	0.000803591	9.29403	1000	Tcf4	Tcf4	protein_coding
chr8	130428001	130429001		12601	133	ENSRNOG00000019404	-	1	0	1	1	1	0.000225135	0.000639029	9.28924	1000	Hhatl	Hhatl	protein_coding
chr11	73329001	73330001		15793	130480	ENSRNOG00000001729	+	0	0	0	1	0	7.99e-07	4.61e-06	9.28374	1000	Xxylt1	Acap2	protein_coding
chr9	41293001	41294001		12955	-1910	ENSRNOG00000014035	+	0	0	1	0	0	7.9e-06	3.47e-05	9.27041	1000	Arhgef4	Fam168b	protein_coding
chr16	56248001	56249001		19622	0	ENSRNOG00000013061	+	1	0	1	1	1	1.4e-12	3.02e-11	9.26553	1000	Tusc3	Tusc3	protein_coding
chr6	99782001	99783001		9313	48	ENSRNOG00000006911	-	1	0	1	1	1	2.79e-11	4.52e-10	9.26467	1000	Sptb	Sptb	protein_coding
chr7	11451001	11452001		9939	-6216	ENSRNOG00000020161	-	0	0	0	0	0	1.16e-11	2.09e-10	9.2587	1000	Zbtb7a	Zbtb7a	protein_coding
chr2	209767001	209768001		3737	490	ENSRNOG00000062002	+	0	0	1	1	1	0.000757367	0.00182834	9.25654	1000	Kcna3	Kcna3	protein_coding
chr19	16689001	16690001		21382	271185	ENSRNOG00000011180	+	0	0	0	0	0	0.00109238	0.00251264	9.25397	1000	Irx5	Irx5	protein_coding
chr9	97064001	97065001		13381	818	ENSRNOG00000019495	-	0	0	1	1	1	0.000827073	0.00197093	9.24494	1000	Gbx2	Gbx2	protein_coding
chr10	59147001	59148001		14305	-3685	ENSRNOG00000059449	+	0	0	1	0	0	0.00532881	0.00986047	9.23815	1000	Metazoa_SRP	Ube2g1	misc_RNA
chr2	184600001	184601001		3425	0	ENSRNOG00000037655	+	1	0	1	1	1	2.13e-05	8.28e-05	9.23708	1000	Gatb	Dear	protein_coding
chr19	38152001	38153001		21648	-5710	ENSRNOG00000047810	+	0	0	0	0	0	8.38e-08	6.11e-07	9.23061	1000	AC128800.1	Slc7a6	miRNA
chr6	96908001	96909001		9287	36377	ENSRNOG00000009296	+	0	0	0	0	0	4.24e-20	4.59e-18	9.2239	1000	Snapc1	Snapc1	protein_coding
chrX	77571001	77572001		22968	-177	ENSRNOG00000002451	-	0	0	1	0	0	4.85e-07	2.96e-06	9.21973	1000	Fndc3c1	Fndc3c1	protein_coding
chr3	21697001	21698001		4399	0	ENSRNOG00000009346	-	1	0	1	1	1	1.76e-09	1.89e-08	9.21662	1000	Zbtb26	Zbtb26	protein_coding
chr5	34007001	34008001		7164	0	ENSRNOG00000007139	+	1	0	1	1	0	2.08e-18	1.58e-16	9.20901	1000	Ttpa	Ttpa	protein_coding
chr19	54163001	54164001		21850	0	ENSRNOG00000017575	-	1	0	1	1	1	3.7e-12	7.45e-11	9.18769	1000	Gins2	Gins2	protein_coding
chr10	34185001	34186001		13908	0	ENSRNOG00000002469	+	0	0	1	1	0	4.18e-07	2.58e-06	9.18345	1000	Trim7	Trim41	protein_coding
chr1	142820001	142821001		1283	-13158	ENSRNOG00000060206	+	0	0	0	0	0	5.09e-11	7.84e-10	9.17911	1000	Zfp592	Acvr1b	protein_coding
chrX	11572001	11573001		22791	-75990	ENSRNOG00000034240	+	0	0	0	0	0	3.94e-14	1.22e-12	9.17699	1000	Bcor	Bcor	protein_coding
chr1	80238001	80239001		552	-16292	ENSRNOG00000046667	-	0	0	0	0	0	1.2e-09	1.34e-08	9.17315	1000	Fosb	Fosb	protein_coding
chr3	43120001	43121001		4469	-843	ENSRNOG00000005600	-	0	0	1	0	0	4.16e-08	3.25e-07	9.16745	1000	Nr4a2	Nr4a2	protein_coding
chr1	167374001	167375001		1473	0	ENSRNOG00000020425	+	1	0	1	1	1	6.51e-07	3.84e-06	9.16526	1000	Stim1	Stim1	protein_coding
chr7	139317001	139318001		11167	456	ENSRNOG00000055597	-	0	0	1	0	1	1.07e-05	4.56e-05	9.15451	1000	Hdac7	Slc48a1	protein_coding
chr8	70293001	70294001		12004	-22693	ENSRNOG00000054617	-	0	0	0	0	0	4.52e-13	1.08e-11	9.15082	1000	AC107597.2	Rab11a	protein_coding
chrX	111944001	111945001		23019	-1253	ENSRNOG00000060899	-	0	0	1	0	0	1.74e-05	6.97e-05	9.15073	1000	AABR07040840.1	Tsc22d3	protein_coding
chr3	164295001	164296001		5510	19907	ENSRNOG00000009594	+	0	0	0	0	0	1.34e-08	1.17e-07	9.14821	1000	Snai1	Snai1	protein_coding
chr18	17689001	17690001		20747	26881	ENSRNOG00000014503	-	0	0	0	0	0	0.000391328	0.00103304	9.13793	1000	Celf4	RGD1562608	protein_coding
chr4	145239001	145240001		6645	0	ENSRNOG00000023077	+	1	0	1	1	1	1.28e-16	6.92e-15	9.13063	1000	Cpne9	Cpne9	protein_coding
chr15	40793001	40794001		18813	0	ENSRNOG00000056083	-	0	0	1	1	1	2.95e-06	1.46e-05	9.12662	1000	AABR07018119.2	Spata13	lincRNA
chr17	65714001	65715001		20441	-201136	ENSRNOG00000051584	-	0	0	0	1	1	0.00232705	0.00483979	9.12115	1000	RNaseP_nuc	Zp4	ribozyme
chr1	32641001	32642001		196	1772	ENSRNOG00000012720	-	0	0	0	0	1	1.99e-06	1.04e-05	9.1101	1000	Irx4	Irx4	protein_coding
chr5	72629001	72630001		7423	-262339	ENSRNOG00000057406	+	0	0	0	0	0	1.94e-05	7.61e-05	9.09955	1000	AABR07048321.1	Klf4	lincRNA
chr5	139505001	139506001		7826	0	ENSRNOG00000009963	-	1	0	1	1	0	8.93e-10	1.03e-08	9.08299	1000	Ctps1	Ctps1	protein_coding
chr12	43909001	43910001		16742	6945	ENSRNOG00000055283	-	0	0	0	0	0	0.000291408	0.000796461	9.081	1000	AABR07036463.1	RGD1562310	snoRNA
chrX	62366001	62367001		22915	0	ENSRNOG00000053562	+	0	0	1	1	1	6.91e-09	6.49e-08	9.06826	1000	Arx	Arx	protein_coding
chr12	40466001	40467001		16650	0	ENSRNOG00000001344	+	1	0	1	1	1	7.14e-05	0.000237874	9.05777	1000	Aldh2	Aldh2	protein_coding
chr5	159512001	159513001		8343	0	ENSRNOG00000008052	+	1	0	1	1	1	4.63e-18	3.32e-16	9.0521	1000	Atp13a2	Atp13a2	protein_coding
chr7	74052001	74053001		10544	4188	ENSRNOG00000011136	+	0	0	0	1	1	5.62e-06	2.57e-05	9.04714	1000	Osr2	Osr2	protein_coding
chr2	198542001	198543001		3623	14000	ENSRNOG00000051920	+	0	0	0	0	0	3.83e-06	1.83e-05	9.04114	1000	U1	Fcgr1a	snRNA
chr18	29014001	29015001		20839	553	ENSRNOG00000019093	-	0	0	1	1	1	6.33e-15	2.4e-13	9.03154	1000	Nrg2	Nrg2	protein_coding
chr20	5608001	5609001		22169	9255	ENSRNOG00000000485	-	0	0	0	0	0	5.42e-07	3.26e-06	9.02778	1000	Bak1	Bak1	protein_coding
chr17	89171001	89172001		20613	0	ENSRNOG00000018200	+	1	0	1	1	1	1.07e-06	6.04e-06	9.02708	1000	Gad2	Gad2	protein_coding
chr11	87081001	87082001		15938	0	ENSRNOG00000001880	-	1	0	1	1	1	9e-08	6.52e-07	9.022	1000	Dgcr6	Dgcr6	protein_coding
chr8	39865001	39866001		11665	-12956	ENSRNOG00000050964	+	0	0	0	1	0	6.38e-10	7.62e-09	9.01948	1000	LOC100911068	LOC100911068	protein_coding
chr7	120141001	120142001		10831	510	ENSRNOG00000009570	+	0	0	1	1	1	1.24e-11	2.22e-10	9.01597	1000	Pdxp	Pdxp	protein_coding
chr16	7435001	7436001		19236	0	ENSRNOG00000019273	+	1	0	1	1	1	3.57e-23	6.91e-21	9.01232	1000	Capn7	Capn7	protein_coding
chr1	153096001	153097001		1354	0	ENSRNOG00000016815	-	1	0	1	1	0	1.85e-14	6.28e-13	8.99627	1000	Tmem135	Tmem135	protein_coding
chr13	52977001	52978001		17207	480	ENSRNOG00000008471	+	0	0	1	0	1	1.37e-08	1.19e-07	8.99269	1000	Kif21b	Kif21b	protein_coding
chr3	110918001	110919001		4906	0	ENSRNOG00000037302	+	1	0	1	1	1	6.16e-06	2.79e-05	8.98824	1000	Rad51	Rad51	protein_coding
chr1	199083001	199084001		1708	-3126	ENSRNOG00000035957	+	0	0	1	0	0	1.05e-05	4.46e-05	8.98148	1000	5S_rRNA	Zfp629	rRNA
chr14	78309001	78310001		18138	-69	ENSRNOG00000004781	-	0	0	1	0	0	4.7e-07	2.87e-06	8.981	1000	Crmp1	Crmp1	protein_coding
chr1	213879001	213880001		1845	-6776	ENSRNOG00000015152	+	0	0	0	1	1	0.000572042	0.00143524	8.97673	1000	Pkp3	Pkp3	protein_coding
chr15	28721001	28722001		18685	0	ENSRNOG00000013111	-	1	0	1	1	0	3.36e-15	1.34e-13	8.95775	1000	Mettl3	Mettl3	protein_coding
chr19	55096001	55097001		21882	1417	ENSRNOG00000043077	+	0	0	0	0	1	3.16e-10	4.09e-09	8.94789	1000	Zfpm1	Zfpm1	protein_coding
chr11	45031001	45032001		15629	92424	ENSRNOG00000001645	-	0	0	0	0	0	1.87e-08	1.57e-07	8.93794	1000	Filip1l	Cmss1	protein_coding
chr6	124218001	124219001		9524	761	ENSRNOG00000004060	+	0	0	1	0	1	5.4e-10	6.57e-09	8.9374	1000	Calm1	Calm1	protein_coding
chr2	116432001	116433001		3149	0	ENSRNOG00000051777	+	0	0	1	1	0	4.1e-13	9.86e-12	8.93452	1000	Terc	Terc	misc_RNA
chr5	162182001	162183001		8417	-328	ENSRNOG00000027142	+	0	0	1	0	1	1.34e-11	2.37e-10	8.93351	1000	Oog1	Pramef8	protein_coding
chr6	136381001	136382001		9711	7	ENSRNOG00000012185	+	1	0	1	1	1	3.65e-14	1.14e-12	8.92599	1000	Zfyve21	Zfyve21	protein_coding
chr1	79865001	79866001		516	-28451	ENSRNOG00000038088	+	0	0	0	1	0	9.36e-05	0.000299672	8.92163	1000	Nanos2	Nanos2	protein_coding
chr12	17732001	17733001		16292	-1134	ENSRNOG00000001312	+	0	0	1	0	0	0.000278513	0.000766872	8.91756	1000	Pdgfa	Pdgfa	protein_coding
chr2	250305001	250306001		3953	46467	ENSRNOG00000055290	-	0	0	0	0	0	2.02e-05	7.9e-05	8.91725	1000	AABR07013686.1	Lmo4	lincRNA
chr16	2607001	2608001		19179	-4899	ENSRNOG00000013574	-	0	0	1	0	0	5.92e-19	5.06e-17	8.91623	1000	Appl1	Hesx1	protein_coding
chr5	154332001	154333001		8207	0	ENSRNOG00000010873	-	1	0	1	1	1	6.49e-06	2.91e-05	8.91304	1000	Pithd1	Lypla2	protein_coding
chr20	14095001	14096001		22406	0	ENSRNOG00000050410	-	1	0	1	1	1	5.8e-20	6.09e-18	8.91158	1000	Snrpd3	Gucd1	protein_coding
chr7	139272001	139273001		11164	304	ENSRNOG00000053196	+	0	0	1	0	1	1.05e-15	4.77e-14	8.90659	1000	Slc48a1	Slc48a1	protein_coding
chr2	219260001	219261001		3788	1902	ENSRNOG00000026953	-	0	1	0	1	0	1.43e-05	5.85e-05	8.90269	1000	Gpr88	Gpr88	protein_coding
chr1	125665001	125666001		1155	-211300	ENSRNOG00000023496	+	0	0	0	0	1	1.65e-11	2.84e-10	8.89911	1000	Fam189a1	Nsmce3	protein_coding
chr9	10949001	10950001		12723	-2375	ENSRNOG00000049918	+	0	0	1	1	1	4.71e-06	2.2e-05	8.87291	1000	Lrg1	Lrg1	protein_coding
chr1	167202001	167203001		1467	0	ENSRNOG00000020251	-	1	0	1	1	1	0.00215467	0.00453072	8.85494	1000	Art1	Art5	protein_coding
chr5	139209001	139210001		7820	17197	ENSRNOG00000032639	-	0	0	0	1	1	1.23e-06	6.8e-06	8.8443	1000	Foxo6	Edn2	protein_coding
chr10	107936001	107937001		15324	35291	ENSRNOG00000057341	+	0	0	0	0	0	0.000114461	0.000357528	8.83946	1000	AABR07030880.1	Ccdc40	lincRNA
chr8	111599001	111600001		12318	-533	ENSRNOG00000009198	+	0	0	1	0	0	0.00122889	0.00278609	8.81873	1000	Rab6b	Rab6b	protein_coding
chr17	21381001	21382001		20177	-456	ENSRNOG00000014702	+	0	0	1	0	0	8.9e-05	0.000286306	8.7853	1000	Elovl2	Elovl2	protein_coding
chr17	71667001	71668001		20479	105605	ENSRNOG00000029235	-	0	0	0	0	0	0.000900747	0.00212443	8.78372	1000	Sfmbt2	Mir466d	protein_coding
chr17	10393001	10394001		20044	8491	ENSRNOG00000018039	+	0	0	0	0	0	0.000175084	0.000515958	8.77903	1000	Sncb	Sncb	protein_coding
chr8	106582001	106583001		12264	0	ENSRNOG00000046364	-	0	0	1	1	0	1.38e-05	5.65e-05	8.76543	1000	AABR07071243.1	Copb2	pseudogene
chr7	22452001	22453001		10158	1018	ENSRNOG00000051635	-	0	0	0	0	0	1.59e-08	1.35e-07	8.76503	1000	5_8S_rRNA	Vom2r57	rRNA
chr10	13141001	13142001		13682	-3100	ENSRNOG00000058561	+	0	0	1	0	0	6.84e-16	3.19e-14	8.75708	1000	Srrm2	Srrm2	protein_coding
chr15	4951001	4952001		18537	0	ENSRNOG00000000341	-	1	0	1	1	1	4.34e-05	0.000154404	8.75668	1000	Nid2	Nid2	protein_coding
chr10	63098001	63099001		14377	0	ENSRNOG00000035537	+	1	0	1	1	1	3.51e-14	1.1e-12	8.75418	1000	Mir423	Mir423	miRNA
chr5	173210001	173211001		8689	-234	ENSRNOG00000018118	-	0	0	1	0	0	1.27e-06	6.98e-06	8.75125	1000	Atad3a	LOC102547290	protein_coding
chrX	23649001	23650001		22840	0	ENSRNOG00000024322	-	1	0	1	1	1	4.47e-12	8.81e-11	8.74384	1000	Shroom2	Shroom2	protein_coding
chr18	5191001	5192001		20680	122512	ENSRNOG00000016874	-	0	0	0	1	1	0.0012684	0.00286254	8.73453	1000	Zfp521	Zfp521	protein_coding
chr5	58937001	58938001		7295	0	ENSRNOG00000053729	+	1	0	1	1	0	3.24e-16	1.6e-14	8.7321	1000	Tesk1	Tesk1	protein_coding
chr9	29526001	29527001		12902	-15636	ENSRNOG00000035646	+	0	0	0	0	0	2.14e-20	2.5e-18	8.72684	1000	Mir30a	Mir30a	miRNA
chr4	8255001	8256001		5883	0	ENSRNOG00000021614	-	1	0	1	1	1	3.91e-15	1.54e-13	8.7198	1000	Kmt2e	Kmt2e	protein_coding
chr12	24579001	24580001		16409	-216	ENSRNOG00000046252	-	0	0	1	0	0	0.000266024	0.000737355	8.71212	1000	Tbl2	Bcl7b	protein_coding
chr20	4555001	4556001		22105	-2714	ENSRNOG00000051235	-	0	0	1	1	1	0.00141277	0.00313634	8.71066	1000	C2	C2	protein_coding
chr20	6421001	6422001		22209	23980	ENSRNOG00000001869	+	0	1	0	1	1	0.00144548	0.00319831	8.71046	1000	Rab44	Cdkn1a	protein_coding
chrX	152237001	152238001		23087	0	ENSRNOG00000061182	-	1	0	1	1	1	0.000445721	0.00115885	8.70784	1000	Gabre	Gabre	protein_coding
chr14	42717001	42718001		17993	0	ENSRNOG00000052897	+	0	0	1	1	1	0.000120251	0.000373693	8.70735	1000	AABR07014983.2	Tmem33	pseudogene
chr19	25820001	25821001		21529	4795	ENSRNOG00000002950	+	0	0	0	0	0	2.63e-05	9.97e-05	8.70238	1000	Lyl1	Lyl1	protein_coding
chr17	78763001	78764001		20533	11	ENSRNOG00000015585	+	1	0	1	1	1	1.1e-30	9.8e-28	8.69566	1000	Suv39h2	Suv39h2	protein_coding
chr10	106785001	106786001		15281	0	ENSRNOG00000046086	+	1	0	1	1	1	0.000573125	0.00143742	8.69475	1000	Tmc8	Tmc8	protein_coding
chr4	2053001	2054001		5792	0	ENSRNOG00000057275	-	1	0	1	1	1	4.1e-07	2.54e-06	8.68932	1000	AABR07059024.1	Rnf32	lincRNA
chr7	12792001	12793001		10078	712	ENSRNOG00000009760	-	0	0	1	0	1	0.000965677	0.00225292	8.6835	1000	Palm	Palm	protein_coding
chr3	91369001	91370001		4790	168	ENSRNOG00000004666	-	1	0	1	1	1	0.00193281	0.00412404	8.66466	1000	Prr5l	Prr5l	protein_coding
chr9	82213001	82214001		13243	441	ENSRNOG00000018059	-	0	0	1	1	1	1.94e-18	1.49e-16	8.66366	1000	Ihh	Ihh	protein_coding
chr3	79717001	79718001		4714	3435	ENSRNOG00000009140	+	0	1	0	1	1	1.12e-09	1.26e-08	8.65748	1000	C1qtnf4	C1qtnf4	protein_coding
chr12	16750001	16751001		16252	-62532	ENSRNOG00000022767	+	0	1	0	1	0	7.06e-05	0.000235852	8.6574	1000	Elfn1	Elfn1	protein_coding
chr10	14021001	14022001		13716	453	ENSRNOG00000012390	-	0	1	1	1	1	0.000111648	0.000349808	8.65245	1000	Npw	Npw	protein_coding
chr1	100554001	100555001		964	0	ENSRNOG00000019681	-	1	1	1	1	0	3.82e-11	6.04e-10	8.64875	1000	Pold1	Nr1h2	protein_coding
chr13	35444001	35445001		17050	-1780	ENSRNOG00000060237	-	0	0	1	0	0	3.66e-11	5.81e-10	8.64797	1000	Inhbb	Inhbb	protein_coding
chr3	80003001	80004001		4724	0	ENSRNOG00000012568	-	1	0	1	1	0	3.53e-14	1.1e-12	8.64142	1000	Madd	Madd	protein_coding
chr7	124670001	124671001		10963	-9295	ENSRNOG00000010834	+	0	0	0	0	0	4.77e-10	5.9e-09	8.64095	1000	Mpped1	Mpped1	protein_coding
chr9	61528001	61529001		13100	0	ENSRNOG00000021384	-	0	0	1	1	1	1.75e-14	6.01e-13	8.63338	1000	Ankrd44	Ankrd44	protein_coding
chr2	140542001	140543001		3259	383	ENSRNOG00000013035	+	1	0	1	1	1	5.57e-07	3.34e-06	8.62806	1000	Rab33b	Rab33b	protein_coding
chr12	9502001	9503001		16113	-789	ENSRNOG00000046458	-	0	0	1	0	0	0.000742787	0.00179871	8.62752	1000	Pdx1	Pdx1	protein_coding
chr10	106371001	106372001		15274	106568	ENSRNOG00000002807	+	0	0	0	0	0	2.74e-05	0.000103225	8.62345	1000	Septin9	2026-09-09	protein_coding
chr10	18459001	18460001		13843	-15038	ENSRNOG00000005042	-	0	0	0	0	0	1.9e-06	9.95e-06	8.61987	1000	Ranbp17	Ranbp17	protein_coding
chr3	111133001	111134001		4912	-1022	ENSRNOG00000014011	+	0	0	1	0	0	1.09e-07	7.71e-07	8.61963	1000	Dll4	Dll4	protein_coding
chr1	15245001	15246001		96	-1334	ENSRNOG00000057719	+	0	0	1	0	0	0.000283392	0.000778378	8.6173	1000	AC136053.1	Slc35d3	lincRNA
chrX	71324001	71325001		22943	0	ENSRNOG00000003689	+	1	0	1	1	1	7.21e-05	0.000239871	8.5923	1000	Nono	Nono	protein_coding
chr4	9966001	9967001		5898	0	ENSRNOG00000011363	+	1	0	1	1	0	1.9e-13	5.01e-12	8.5914	1000	Napepld	Napepld	protein_coding
chr6	95996001	95997001		9271	1530	ENSRNOG00000007250	-	0	0	0	0	1	0.000596063	0.00148601	8.58889	1000	Six4	Six4	protein_coding
chr1	94494001	94495001		919	0	ENSRNOG00000014786	-	1	0	1	1	1	1.22e-18	9.66e-17	8.58189	1000	Ccne1	Ccne1	protein_coding
chr8	97647001	97648001		12223	0	ENSRNOG00000014543	-	1	0	1	1	0	1.49e-14	5.21e-13	8.57448	1000	Tbc1d2b	Tbc1d2b	protein_coding
chr7	70364001	70365001		10483	0	ENSRNOG00000025584	+	0	0	1	1	0	4.68e-06	2.19e-05	8.57324	1000	Agap2	Agap2	protein_coding
chr5	170730001	170731001		8611	40123	ENSRNOG00000048893	-	0	0	0	0	0	0.00358216	0.0070334	8.56641	1000	AABR07050600.1	Ajap1	miRNA
chr7	77678001	77679001		10581	0	ENSRNOG00000004846	+	1	0	1	1	0	3.43e-14	1.08e-12	8.55998	1000	Atp6v1c1	Atp6v1c1	protein_coding
chr5	108278001	108279001		7550	0	ENSRNOG00000024093	+	1	0	1	1	1	2.54e-14	8.29e-13	8.55887	1000	Dmrta1	Dmrta1	protein_coding
chr13	85109001	85110001		17382	-99	ENSRNOG00000051941	+	0	0	1	0	0	7.43e-13	1.71e-11	8.55292	1000	Fam78b	Fmo9	protein_coding
chr20	7220001	7221001		22242	-454	ENSRNOG00000000490	-	0	0	1	0	0	9.9e-22	1.45e-19	8.54832	1000	Rps10	Rps10	protein_coding
chr6	75865001	75866001		9152	8236	ENSRNOG00000006828	-	0	0	0	0	1	1.27e-08	1.11e-07	8.54198	1000	Baz1a	Baz1a	protein_coding
chr1	225369001	225370001		2144	-39232	ENSRNOG00000020202	-	0	0	0	0	0	0.000957108	0.0022348	8.52913	1000	Asrgl1	Asrgl1	protein_coding
chr17	9153001	9154001		19992	-657	ENSRNOG00000022405	+	0	0	1	0	0	0.000946538	0.00221524	8.52192	1000	Neurog1	Neurog1	protein_coding
chr20	22883001	22884001		22490	-330	ENSRNOG00000000648	-	0	0	1	0	0	9e-10	1.04e-08	8.51859	1000	Jmjd1c	Jmjd1c	protein_coding
chr12	17188001	17189001		16277	-1323	ENSRNOG00000001284	-	0	0	1	0	0	1.21e-06	6.71e-06	8.51787	1000	Uncx	Uncx	protein_coding
chr16	20318001	20319001		19374	556	ENSRNOG00000018932	+	0	0	1	0	1	1.32e-07	9.13e-07	8.51212	1000	Ccdc124	Ccdc124	protein_coding
chr3	93921001	93922001		4802	555	ENSRNOG00000009401	+	0	0	1	1	1	2.17e-06	1.12e-05	8.5107	1000	Lmo2	Lmo2	protein_coding
chr17	43808001	43809001		20329	0	ENSRNOG00000047776	+	0	0	1	1	1	3.54e-13	8.64e-12	8.50473	1000	AABR07027753.2	Hist1h2bl	pseudogene
chr12	12374001	12375001		16162	0	ENSRNOG00000001010	+	1	0	1	1	1	2.74e-24	6.52e-22	8.48713	1000	Tecpr1	Tecpr1	protein_coding
chr19	40453001	40454001		21678	-401434	ENSRNOG00000017602	+	0	0	0	0	0	6.81e-12	1.29e-10	8.47527	1000	Il34	Il34	protein_coding
chr5	162809001	162810001		8419	356	ENSRNOG00000015736	+	1	0	1	1	1	2.11e-06	1.09e-05	8.47484	1000	Dhrs3	Dhrs3	protein_coding
chr10	11207001	11208001		13633	776	ENSRNOG00000005227	+	0	0	1	0	1	2.31e-15	9.68e-14	8.4705	1000	Tfap4	Tfap4	protein_coding
chr2	164131001	164132001		3357	-4219	ENSRNOG00000012478	-	0	0	1	0	0	2.38e-16	1.23e-14	8.46312	1000	Shox2	Rsrc1	protein_coding
chr1	280637001	280638001		2640	3064	ENSRNOG00000009482	+	0	0	0	1	1	0.00375748	0.00733123	8.45281	1000	Emx2	Emx2	protein_coding
chr19	25134001	25135001		21487	0	ENSRNOG00000005619	-	1	0	1	1	0	3.6e-06	1.73e-05	8.44874	1000	Misp3	Misp3	protein_coding
chr20	29656001	29657001		22533	776	ENSRNOG00000061544	+	0	0	1	0	1	0.000314405	0.000850425	8.44786	1000	Spock2	Spock2	protein_coding
chrX	105417001	105418001		22999	0	ENSRNOG00000011513	-	0	0	1	1	1	0.00011611	0.000362088	8.43855	1000	Gla	Hnrnph2	protein_coding
chr2	102310001	102311001		3103	-604	ENSRNOG00000035499	+	0	0	1	0	0	0.000789208	0.00189662	8.43799	1000	Mir124-2	Mir124-2	miRNA
chr14	91782001	91783001		18344	0	ENSRNOG00000004444	+	1	0	1	1	1	1.08e-15	4.9e-14	8.43633	1000	Ikzf1	Ikzf1	protein_coding
chr5	151452001	151453001		8102	6038	ENSRNOG00000008600	-	0	0	0	1	1	3.94e-08	3.09e-07	8.4288	1000	Sytl1	Sytl1	protein_coding
chr8	107807001	107808001		12282	419	ENSRNOG00000014521	-	0	0	1	0	1	9.36e-11	1.36e-09	8.42253	1000	Armc8	Armc8	protein_coding
chr5	167056001	167057001		8500	-4795	ENSRNOG00000054768	+	0	0	1	0	0	0.000595596	0.00148512	8.42053	1000	AABR07050487.1	H6pd	lincRNA
chr3	9183001	9184001		4227	-1814	ENSRNOG00000055886	+	0	0	1	0	0	0.000229598	0.000649154	8.40118	1000	AABR07051399.1	Aif1l	pseudogene
chr12	16127001	16128001		16244	-49	ENSRNOG00000001250	-	0	0	1	0	0	8.66e-06	3.77e-05	8.39958	1000	Lfng	Lfng	protein_coding
chrX	110819001	110820001		23013	286	ENSRNOG00000055721	+	0	0	1	1	1	8.27e-07	4.75e-06	8.39864	1000	Rnf128	Rnf128	protein_coding
chr17	43689001	43690001		20319	0	ENSRNOG00000056989	-	1	1	1	1	0	1.06e-12	2.36e-11	8.39272	1000	AC130391.5	Hist1h2bh	miRNA
chr9	82584001	82585001		13260	-11356	ENSRNOG00000019850	+	0	0	0	1	0	1.02e-08	9.21e-08	8.3913	1000	Speg	Speg	protein_coding
chr8	98735001	98736001		12224	2447	ENSRNOG00000014644	-	0	0	0	1	1	0.00226713	0.00473585	8.39011	1000	Zic1	Zic1	protein_coding
chr10	103266001	103267001		15142	0	ENSRNOG00000024523	+	1	0	1	1	1	0.000727431	0.00176791	8.38891	1000	Dnai2	Dnai2	protein_coding
chr1	221873001	221874001		2071	782	ENSRNOG00000021103	+	0	0	1	0	1	0.00014438	0.000435681	8.38247	1000	Nrxn2	Slc22a12	protein_coding
chr19	56948001	56949001		21939	34808	ENSRNOG00000032602	-	0	0	0	0	0	0.00408446	0.00787132	8.38104	1000	Cox6c-ps1	Cox6c-ps1	protein_coding
chr3	81911001	81912001		4766	0	ENSRNOG00000008674	-	1	0	1	1	0	8.61e-05	0.000278486	8.37573	1000	Prdm11	Prdm11	protein_coding
chr19	58565001	58566001		21978	0	ENSRNOG00000019922	+	1	0	1	1	1	2.96e-09	3.05e-08	8.36804	1000	Ntpcr	Ntpcr	protein_coding
chr4	132742001	132743001		6612	-1064	ENSRNOG00000005353	-	0	0	1	0	0	8.3e-09	7.64e-08	8.35261	1000	Rybp	Rybp	protein_coding
chr14	79446001	79447001		18153	0	ENSRNOG00000027326	+	1	0	1	1	1	1.63e-08	1.38e-07	8.35249	1000	Tada2b	Tada2b	protein_coding
chr3	150188001	150189001		5276	0	ENSRNOG00000046585	+	0	0	1	1	1	2.77e-08	2.24e-07	8.34614	1000	AABR07054370.1	Pxmp4	protein_coding
chr7	12498001	12499001		10046	10641	ENSRNOG00000013987	+	0	0	0	0	1	5.03e-08	3.86e-07	8.34454	1000	Sbno2	Gpx4	protein_coding
chr12	32740001	32741001		16508	0	ENSRNOG00000000961	-	1	0	1	1	1	0.000294161	0.000803161	8.34306	1000	Glt1d1	Slc15a4	protein_coding
chr4	157486001	157487001		6781	0	ENSRNOG00000016778	-	1	0	1	1	1	4.05e-17	2.48e-15	8.33147	1000	Cops7a	Cops7a	protein_coding
chr3	95705001	95706001		4834	-1387	ENSRNOG00000004410	+	0	0	1	0	0	9e-05	0.000288802	8.3301	1000	Pax6	Pax6	protein_coding
chr16	62240001	62241001		19669	-15	ENSRNOG00000014915	-	0	0	1	0	1	4.84e-17	2.91e-15	8.32261	1000	Gsr	Gsr	protein_coding
chrX	54013001	54014001		22908	-48936	ENSRNOG00000003643	+	0	0	0	0	0	1.78e-07	1.19e-06	8.31213	1000	Tab3	LOC100363193	protein_coding
chr1	267032001	267033001		2527	78863	ENSRNOG00000020339	+	0	0	0	1	1	0.000537312	0.00136142	8.30537	1000	Neurl1	Neurl1	protein_coding
chrX	96340001	96341001		22994	55479	ENSRNOG00000057035	-	0	0	0	0	0	0.00384061	0.00747266	8.29563	1000	AABR07040249.1	RGD1562485	lincRNA
chr20	4350001	4351001		22082	-4176	ENSRNOG00000000443	+	0	0	1	1	1	0.00161922	0.00353293	8.29515	1000	LOC103689965	Gpsm3	protein_coding
chr18	15023001	15024001		20718	65989	ENSRNOG00000049345	-	0	0	0	0	0	0.00144362	0.00319474	8.29482	1000	Mep1b	Mep1b	protein_coding
chr1	127802001	127803001		1174	0	ENSRNOG00000037080	+	0	0	1	1	0	7.65e-05	0.000252544	8.28012	1000	Adamts17	Cers3	protein_coding
chr1	85216001	85217001		735	2350	ENSRNOG00000054506	+	0	1	0	1	1	0.00168251	0.00365426	8.26932	1000	Nccrp1	Nccrp1	protein_coding
chr5	62131001	62132001		7374	21674	ENSRNOG00000008945	+	0	1	0	1	1	1.14e-10	1.63e-09	8.26182	1000	Nans	Nans	protein_coding
chr12	15768001	15769001		16228	-33565	ENSRNOG00000024277	+	0	0	0	0	1	0.00537545	0.00993025	8.25964	1000	AABR07035470.1	Gna12	processed_transcript
chr1	220826001	220827001		2009	0	ENSRNOG00000020552	+	1	0	1	1	1	7.47e-05	0.000247498	8.25736	1000	Fosl1	Fosl1	protein_coding
chr20	4438001	4439001		22097	1583	ENSRNOG00000033581	+	0	0	0	1	1	1.48e-05	6.03e-05	8.24583	1000	AABR07044388.2	Atf6b	processed_transcript
chr7	20001	21001		9812	1550	ENSRNOG00000059018	+	0	0	0	0	0	0.000746125	0.00180577	8.24556	1000	5_8S_rRNA	Stx19	rRNA
chr10	91710001	91711001		14967	0	ENSRNOG00000028436	+	1	0	1	1	0	8.94e-17	5.03e-15	8.22434	1000	Rprml	Rprml	protein_coding
chr5	158421001	158422001		8317	17065	ENSRNOG00000018867	-	0	0	0	0	0	0.00261526	0.00535817	8.21827	1000	Klhdc7a	Pax7	protein_coding
chr3	161917001	161918001		5457	0	ENSRNOG00000018747	-	0	0	1	1	1	0.0003345	0.000899673	8.21508	1000	LOC102555457	Cdh22	protein_coding
chr7	138099001	138100001		11147	842	ENSRNOG00000006305	-	1	0	1	1	1	1.66e-08	1.4e-07	8.21231	1000	Slc38a2	Slc38a2	protein_coding
chr5	113284001	113285001		7557	-81164	ENSRNOG00000061020	-	0	0	0	0	0	0.00318179	0.00634918	8.20536	1000	AABR07049282.1	Caap1	lincRNA
chr15	19877001	19878001		18608	-594	ENSRNOG00000009102	-	0	0	1	0	0	0.00491375	0.00921	8.20028	1000	Fermt2	Dda1	protein_coding
chr17	4848001	4849001		19915	1213	ENSRNOG00000050485	+	0	0	0	0	0	1.06e-06	5.99e-06	8.20018	1000	Gas1	Dapk1	protein_coding
chr15	11649001	11650001		18569	-11	ENSRNOG00000005883	+	0	0	1	0	1	2.49e-11	4.08e-10	8.2	1000	Nek10	Slc4a7	protein_coding
chr3	134733001	134734001		5127	-36348	ENSRNOG00000004874	-	0	0	0	0	0	0.000142479	0.000431245	8.19352	1000	Flrt3	Flrt3	protein_coding
chr5	116548001	116549001		7572	10614	ENSRNOG00000006966	-	0	0	0	0	1	5.05e-06	2.33e-05	8.1827	1000	Nfia	Nfia	protein_coding
chr8	29452001	29453001		11604	-644	ENSRNOG00000023809	+	0	0	1	0	0	1.11e-12	2.47e-11	8.17389	1000	Opcml	Opcml	protein_coding
chr9	16884001	16885001		12816	21697	ENSRNOG00000018416	+	0	0	0	0	1	0.000742802	0.00179871	8.1731	1000	Ttbk1	Ttbk1	protein_coding
chr20	3438001	3439001		22054	0	ENSRNOG00000000826	-	1	1	1	1	1	0.000185229	0.000541311	8.1716	1000	Flot1	Flot1	protein_coding
chr4	133179001	133180001		6615	0	ENSRNOG00000005621	+	0	0	1	1	1	3.93e-29	1.87e-26	8.16728	1000	Gxylt2	Shq1	protein_coding
chr10	103002001	103003001		15133	140687	ENSRNOG00000053967	+	0	0	0	0	0	0.000868399	0.00205793	8.163	1000	AC118434.2	Rpl38	lincRNA
chr7	12264001	12265001		10014	7615	ENSRNOG00000016399	+	0	0	0	1	0	0.00490016	0.0091871	8.15629	1000	RGD1359127	RGD1359127	protein_coding
chr4	121565001	121566001		6539	0	ENSRNOG00000060248	-	1	0	1	1	1	1.02e-13	2.82e-12	8.15551	1000	Chchd6	Chchd6	protein_coding
chr5	169506001	169507001		8586	0	ENSRNOG00000011104	+	1	0	1	1	1	1.11e-27	4.24e-25	8.15331	1000	LOC100360057	Rpl22	protein_coding
chr6	47903001	47904001		9051	164	ENSRNOG00000008551	-	0	0	1	1	1	0.000615939	0.00152898	8.14744	1000	Rps7	Rps7	protein_coding
chr2	54963001	54964001		2974	0	ENSRNOG00000013240	-	0	0	1	1	0	6.14e-05	0.000208901	8.14287	1000	Ptger4	Ptger4	protein_coding
chr18	51785001	51786001		20980	0	ENSRNOG00000013774	+	1	0	1	1	1	1.7e-10	2.35e-09	8.14151	1000	Lmnb1	Lmnb1	protein_coding
chr1	90087001	90088001		845	3288	ENSRNOG00000023150	-	0	0	0	1	1	0.000586746	0.00146717	8.13411	1000	Gpi	Gpi	protein_coding
chr3	7797001	7798001		4177	-617	ENSRNOG00000013694	-	0	0	1	0	0	9.41e-06	4.06e-05	8.12731	1000	Ntng2	Ntng2	protein_coding
chr2	183140001	183141001		3413	-11070	ENSRNOG00000024733	-	0	0	0	0	0	4.13e-13	9.91e-12	8.11808	1000	Mnd1	Trim2	protein_coding
chr4	29913001	29914001		5977	-64740	ENSRNOG00000008869	+	0	0	0	0	0	8.68e-05	0.000280162	8.11144	1000	Ppp1r9a	Ppp1r9a	protein_coding
chr19	16730001	16731001		21383	-274762	ENSRNOG00000011728	+	0	0	0	0	0	0.000917345	0.00215866	8.10957	1000	Fto	Irx5	protein_coding
chr2	196207001	196208001		3581	0	ENSRNOG00000021042	-	1	0	1	1	1	3e-18	2.22e-16	8.10822	1000	Psmd4	Psmd4	protein_coding
chr14	71853001	71854001		18105	272	ENSRNOG00000005261	+	0	0	1	0	1	1.34e-05	5.52e-05	8.10534	1000	Fbxl5	Fbxl5	protein_coding
chr1	101689001	101690001		1036	705	ENSRNOG00000021027	+	0	0	1	1	1	7.46e-15	2.76e-13	8.09571	1000	Dbp	Dbp	protein_coding
chrX	92599001	92600001		22987	2624	ENSRNOG00000030330	+	0	0	0	0	1	1.97e-08	1.64e-07	8.08824	1000	AABR07040095.1	Pcdh11x	protein_coding
chr1	81046001	81047001		600	-2662	ENSRNOG00000024376	-	0	0	1	0	1	6.98e-09	6.56e-08	8.08771	1000	Zfp111	Zfp111	protein_coding
chr7	116917001	116918001		10737	2508	ENSRNOG00000032231	-	0	0	0	1	1	0.000581614	0.00145543	8.08001	1000	Mroh6	Naprt	protein_coding
chr10	91199001	91200001		14954	-875	ENSRNOG00000003203	+	0	0	1	0	0	3.48e-07	2.19e-06	8.07803	1000	Hexim1	Hexim1	protein_coding
chr1	146909001	146910001		1329	58690	ENSRNOG00000047724	-	0	0	0	0	0	2.78e-13	7.05e-12	8.07558	1000	AABR07004507.1	Zfand6	protein_coding
chr9	93030001	93031001		13327	0	ENSRNOG00000017540	+	1	0	1	1	1	1.15e-12	2.54e-11	8.07381	1000	Spata3	Spata3	protein_coding
chr19	39065001	39066001		21664	1004	ENSRNOG00000059362	+	0	0	1	0	1	1.28e-07	8.88e-07	8.07115	1000	Has3	Has3	protein_coding
chrX	156227001	156228001		23105	0	ENSRNOG00000060839	+	0	0	1	1	0	5.45e-14	1.61e-12	8.06261	1000	LOC690348	Olr1768	protein_coding
chr17	78962001	78963001		20537	0	ENSRNOG00000026248	-	1	0	1	1	1	2.45e-13	6.31e-12	8.0618	1000	Nmt2	Nmt2	protein_coding
chr13	88536001	88537001		17402	0	ENSRNOG00000002941	-	1	0	1	1	1	7.23e-08	5.34e-07	8.05974	1000	Uhmk1	Uhmk1	protein_coding
chr1	221114001	221115001		2036	1480	ENSRNOG00000023668	-	0	0	0	1	1	0.0002444	0.000685395	8.05941	1000	Scyl1	Ltbp3	protein_coding
chr4	118471001	118472001		6485	180	ENSRNOG00000017720	-	0	0	1	1	1	3.51e-07	2.2e-06	8.05729	1000	Mxd1	Mxd1	protein_coding
chr6	131902001	131903001		9617	11029	ENSRNOG00000005776	-	0	0	0	0	1	0.000280948	0.00077278	8.05142	1000	Bcl11b	Bcl11b	protein_coding
chr5	45492001	45493001		7201	63770	ENSRNOG00000060249	-	0	0	0	0	0	0.000893285	0.00210762	8.04835	1000	AABR07047744.2	Map3k7	pseudogene
chr1	64127001	64128001		356	120	ENSRNOG00000061893	+	0	0	1	1	1	1.57e-05	6.33e-05	8.04198	1000	Leng1	Leng1	protein_coding
chr18	28684001	28685001		20827	30349	ENSRNOG00000032878	+	0	0	0	0	0	2.01e-06	1.05e-05	8.03687	1000	Cxxc5	Cxxc5	protein_coding
chr19	44164001	44165001		21728	0	ENSRNOG00000019425	+	1	0	1	1	0	2.34e-15	9.75e-14	8.03363	1000	Gabarapl2	Gabarapl2	protein_coding
chr1	82421001	82422001		672	1055	ENSRNOG00000020606	+	1	0	0	1	1	0.00100641	0.00233773	8.01203	1000	B3gnt8	B3gnt8	protein_coding
chr1	31736001	31737001		177	33517	ENSRNOG00000039776	+	0	1	0	1	1	0.000167309	0.000495345	8.01156	1000	Exoc3	Exoc3	protein_coding
chr10	39323001	39324001		13984	0	ENSRNOG00000008432	-	1	0	1	1	1	2.56e-25	6.97e-23	8.0099	1000	Slc22a5	Slc22a4	protein_coding
chr1	80222001	80223001		549	-292	ENSRNOG00000046667	-	0	0	1	0	0	4.48e-20	4.78e-18	8.00479	1000	Fosb	Fosb	protein_coding
chr2	210299001	210300001		3744	0	ENSRNOG00000050090	-	0	0	1	1	0	7.05e-17	4.09e-15	8.00468	1000	Slc6a17	Slc6a17	protein_coding
chr13	50632001	50633001		17157	-53282	ENSRNOG00000002907	-	0	0	0	0	0	0.00229012	0.00477789	7.9954	1000	Plekha6	Golt1a	processed_transcript
chr7	1624001	1625001		9826	-170	ENSRNOG00000053668	+	0	0	1	0	0	4.01e-05	0.00014375	7.98199	1000	5_8S_rRNA	Pros1	rRNA
chr10	69737001	69738001		14490	0	ENSRNOG00000007455	+	1	0	1	1	1	6.95e-08	5.15e-07	7.97969	1000	Tmem132e	Tmem132e	protein_coding
chr6	44225001	44226001		9033	0	ENSRNOG00000023176	+	1	0	1	1	1	5.46e-13	1.28e-11	7.97319	1000	Kidins220	Kidins220	protein_coding
chr10	75398001	75399001		14580	32180	ENSRNOG00000009819	+	0	0	0	0	0	6.99e-10	8.28e-09	7.96569	1000	Vezf1	Vezf1	protein_coding
chr6	35321001	35322001		8983	6558	ENSRNOG00000004210	+	0	1	0	1	0	1.5e-06	8.11e-06	7.95594	1000	Osr1	Osr1	protein_coding
chr5	58149001	58150001		7278	-1986	ENSRNOG00000015068	+	0	0	1	0	0	0.000313084	0.000847884	7.94856	1000	Il11ra1	Il11ra1	protein_coding
chr2	112983001	112984001		3122	-23550	ENSRNOG00000013269	+	0	0	0	0	0	1.77e-06	9.36e-06	7.94839	1000	Tnfsf10	Tnfsf10	protein_coding
chr7	12433001	12434001		10040	0	ENSRNOG00000024349	+	1	0	1	1	0	2.95e-16	1.49e-14	7.94627	1000	Cbarp	Cbarp	protein_coding
chr9	52773001	52774001		13065	56458	ENSRNOG00000049995	-	0	0	0	0	0	0.00361938	0.00709916	7.94567	1000	Slc40a1	Wdr75	protein_coding
chr19	37305001	37306001		21617	0	ENSRNOG00000028844	+	1	0	1	1	1	5.6e-11	8.49e-10	7.92818	1000	Slc9a5	Slc9a5	protein_coding
chr12	36991001	36992001		16532	-31689	ENSRNOG00000001004	+	0	0	0	0	1	2.64e-05	9.99e-05	7.92668	1000	Ncor2	Rflna	protein_coding
chr13	52854001	52855001		17205	0	ENSRNOG00000010204	+	1	0	1	1	1	1.37e-05	5.62e-05	7.92431	1000	Tmem9	Tmem9	protein_coding
chr4	83390001	83391001		6287	-284	ENSRNOG00000008622	+	0	0	1	0	0	1.5e-05	6.07e-05	7.9229	1000	Creb5	Creb5	protein_coding
chr1	78779001	78780001		502	11091	ENSRNOG00000016434	+	0	0	0	1	1	0.000570196	0.00143142	7.92179	1000	Prkd2	Prkd2	protein_coding
chr10	109373001	109374001		15376	-39103	ENSRNOG00000004604	-	0	0	0	0	0	8.7e-14	2.46e-12	7.9203	1000	Slc38a10	Ndufaf8	protein_coding
chr6	137785001	137786001		9761	0	ENSRNOG00000014693	+	1	0	1	1	1	5.49e-12	1.06e-10	7.91674	1000	Btbd6	Btbd6	protein_coding
chr19	37476001	37477001		21620	0	ENSRNOG00000017084	+	1	0	1	1	1	1.32e-09	1.46e-08	7.91459	1000	Hsd11b2	Hsd11b2	protein_coding
chr7	126228001	126229001		10998	0	ENSRNOG00000014637	+	1	0	1	1	1	6.79e-10	8.05e-09	7.90469	1000	Atxn10	Atxn10	protein_coding
chr7	134023001	134024001		11105	43183	ENSRNOG00000053692	+	0	0	0	0	0	0.00163569	0.00356594	7.89093	1000	AABR07058706.1	Pdzrn4	snoRNA
chr3	158619001	158620001		5378	-72272	ENSRNOG00000051934	+	0	0	0	0	0	0.00136375	0.00304372	7.88308	1000	LOC108350518	Olr1259	lincRNA
chr10	84976001	84977001		14730	0	ENSRNOG00000009902	-	1	0	1	1	1	2.44e-08	2e-07	7.88086	1000	Lrrc46	Mrpl10	protein_coding
chr7	119622001	119623001		10818	73	ENSRNOG00000000186	-	0	0	1	1	1	0.000373975	0.000991843	7.86637	1000	Tst	Tst	protein_coding
chr13	49289001	49290001		17130	11280	ENSRNOG00000028752	+	0	0	0	1	1	0.000548107	0.00138378	7.86151	1000	Tmem81	Tmem81	protein_coding
chr7	3355001	3356001		9871	0	ENSRNOG00000007905	+	1	0	1	1	1	7.55e-10	8.86e-09	7.84554	1000	Itga7	Itga7	protein_coding
chr20	7134001	7135001		22236	-1008	ENSRNOG00000000488	+	0	0	1	0	0	8.86e-10	1.02e-08	7.84314	1000	Hmga1	Hmga1	protein_coding
chr7	23843001	23844001		10166	0	ENSRNOG00000004637	-	1	0	1	1	1	7.52e-17	4.34e-15	7.83862	1000	Fbxo7	Fbxo7	protein_coding
chr14	108799001	108800001		18444	0	ENSRNOG00000058991	-	0	0	1	1	0	0.00107229	0.00247396	7.83712	1000	AABR07016640.3	Bcl11a	protein_coding
chr3	82553001	82554001		4775	4043	ENSRNOG00000000008	+	0	0	0	0	1	2.67e-05	0.000101244	7.83567	1000	Alx4	Alx4	protein_coding
chr5	149006001	149007001		8041	-17033	ENSRNOG00000059967	-	0	0	0	0	0	6.17e-07	3.67e-06	7.8239	1000	AABR07050044.1	Laptm5	snoRNA
chr18	30875001	30876001		20873	0	ENSRNOG00000027277	+	0	0	1	1	0	0.000294323	0.000803438	7.82107	1000	Pcdhga8	Pcdhga8	protein_coding
chr1	165296001	165297001		1436	155	ENSRNOG00000017118	+	0	0	1	1	1	1.76e-11	3e-10	7.80581	1000	P4ha3	P4ha3	protein_coding
chr4	118327001	118328001		6481	603	ENSRNOG00000017708	-	0	0	1	1	0	8.72e-05	0.000281412	7.8028	1000	AABR07073038.1	RGD1306746	pseudogene
chr5	129752001	129753001		7686	-3150	ENSRNOG00000008105	+	0	0	1	0	0	0.00533839	0.00987409	7.80268	1000	Dmrta2	Dmrta2	protein_coding
chr12	18139001	18140001		16304	0	ENSRNOG00000028651	-	1	0	1	1	1	9.67e-10	1.1e-08	7.80049	1000	RGD1566386	RGD1566386	protein_coding
chr3	81430001	81431001		4759	-59385	ENSRNOG00000058159	+	0	0	0	0	0	0.0025522	0.00524266	7.79622	1000	AABR07052892.1	Slc35c1	miRNA
chr19	54059001	54060001		21840	-623	ENSRNOG00000017489	+	0	0	1	0	0	0.00177441	0.00382584	7.79598	1000	Gse1	Gins2	protein_coding
chr1	87230001	87231001		776	5325	ENSRNOG00000020676	+	0	0	0	1	1	0.00321336	0.00640281	7.79532	1000	Ppp1r14a	Ppp1r14a	protein_coding
chr14	67168001	67169001		18091	1362	ENSRNOG00000003840	-	0	0	0	0	1	2.13e-06	1.1e-05	7.79221	1000	Slit2	Slit2	protein_coding
chr16	83085001	83086001		19841	-27	ENSRNOG00000012934	-	0	0	1	0	1	1.07e-12	2.39e-11	7.79182	1000	Arhgef7	Arhgef7	protein_coding
chr7	145724001	145725001		11415	-2344	ENSRNOG00000054065	+	0	0	1	0	0	0.00178136	0.00383773	7.79178	1000	AABR07058976.1	Cistr	lincRNA
chr10	69736001	69737001		14489	-329	ENSRNOG00000007455	+	0	0	1	0	0	2.53e-14	8.28e-13	7.78165	1000	Tmem132e	Tmem132e	protein_coding
chr5	58994001	58995001		7299	0	ENSRNOG00000057527	-	0	0	1	1	0	3.27e-06	1.6e-05	7.77905	1000	RNase_MRP	Sit1	ribozyme
chr1	79798001	79799001		513	7297	ENSRNOG00000013395	+	0	0	0	1	1	0.000119413	0.000371346	7.77626	1000	Pglyrp1	Pglyrp1	protein_coding
chr19	21492001	21493001		21431	0	ENSRNOG00000015162	-	1	0	1	1	1	3.02e-19	2.76e-17	7.77339	1000	Lonp2	Lonp2	protein_coding
chr5	76813001	76814001		7454	71	ENSRNOG00000016692	+	1	0	1	1	1	1.67e-08	1.41e-07	7.77301	1000	Hsdl2	Hsdl2	protein_coding
chr1	198297001	198298001		1677	77	ENSRNOG00000019960	-	1	0	1	1	1	1.67e-09	1.81e-08	7.76469	1000	Ino80e	Ino80e	protein_coding
chr13	113723001	113724001		17668	30871	ENSRNOG00000045558	+	0	0	0	0	0	1.13e-15	5.06e-14	7.76384	1000	Cd34	Cd34	protein_coding
chr6	77608001	77609001		9172	0	ENSRNOG00000008826	+	0	0	1	1	0	8.85e-08	6.42e-07	7.76116	1000	Pax9	Pax9	protein_coding
chr7	120780001	120781001		10861	0	ENSRNOG00000051170	-	1	0	1	1	0	6.03e-11	9.07e-10	7.74596	1000	Ddx17	Ddx17	protein_coding
chr3	43116001	43117001		4466	338	ENSRNOG00000005600	-	1	0	1	1	1	8.46e-08	6.16e-07	7.74339	1000	Nr4a2	Nr4a2	protein_coding
chr19	25311001	25312001		21499	-6583	ENSRNOG00000035644	+	0	0	0	0	0	1.22e-09	1.36e-08	7.74319	1000	Mir23a	Mir23a	miRNA
chr8	62696001	62697001		11915	0	ENSRNOG00000007442	+	1	0	1	1	1	2.02e-10	2.74e-09	7.74257	1000	Ubl7	Ubl7	protein_coding
chr3	9552001	9553001		4239	-10952	ENSRNOG00000056579	-	0	0	0	0	0	4.4e-06	2.08e-05	7.74097	1000	AC142138.1	RGD1311084	pseudogene
chr9	95290001	95291001		13360	0	ENSRNOG00000023172	-	1	1	1	1	1	1.06e-07	7.53e-07	7.73226	1000	Dnajb3	Dnajb3	protein_coding
chr13	104284001	104285001		17581	0	ENSRNOG00000004066	-	1	0	1	1	1	3.27e-20	3.69e-18	7.72284	1000	LOC100912365	Dusp10	protein_coding
chr18	38649001	38650001		20935	-197633	ENSRNOG00000011225	+	0	0	0	0	0	0.00369784	0.00723391	7.72107	1000	LOC102554034	RGD1563060	protein_coding
chr20	2103001	2104001		22020	0	ENSRNOG00000000781	-	1	0	1	1	1	6.1e-21	7.68e-19	7.72049	1000	Rnf39	Rnf39	protein_coding
chr18	28674001	28675001		20824	20349	ENSRNOG00000032878	+	0	0	0	0	0	0.0011057	0.00254137	7.71973	1000	Cxxc5	Cxxc5	protein_coding
chr15	2366001	2367001		18491	-7583	ENSRNOG00000014237	+	0	0	0	0	0	8.26e-05	0.000268553	7.71302	1000	Zfp503	Zfp503	protein_coding
chr6	76041001	76042001		9154	0	ENSRNOG00000046391	+	0	0	1	1	1	1.14e-25	3.3e-23	7.71191	1000	Fam177a1	Ppp2r3c	protein_coding
chr16	19772001	19773001		19327	4415	ENSRNOG00000016892	-	0	0	0	1	1	7.33e-10	8.63e-09	7.70856	1000	Nr2f6	Nr2f6	protein_coding
chr1	19999001	20000001		124	-22794	ENSRNOG00000011720	+	0	0	0	0	0	5.19e-07	3.14e-06	7.70206	1000	L3mbtl3	Samd3	protein_coding
chr6	11297001	11298001		8833	217	ENSRNOG00000015667	-	0	0	1	0	1	2.02e-05	7.88e-05	7.69574	1000	Epcam	Epcam	protein_coding
chr20	44803001	44804001		22647	0	ENSRNOG00000000593	+	1	0	1	1	0	1.96e-12	4.1e-11	7.69406	1000	Rev3l	Rev3l	protein_coding
chr3	165699001	165700001		5551	490	ENSRNOG00000042101	-	0	0	1	0	1	7.05e-08	5.22e-07	7.6896	1000	Zfp93	Zfp93	protein_coding
chr4	49440001	49441001		6047	-135	ENSRNOG00000060349	-	0	0	1	0	0	2.41e-06	1.23e-05	7.68908	1000	Fam3c	Scn4b	protein_coding
chr5	152919001	152920001		8162	344	ENSRNOG00000017087	-	0	0	1	1	1	2.74e-07	1.77e-06	7.68625	1000	Man1c1	Man1c1	protein_coding
chr12	36873001	36874001		16530	982	ENSRNOG00000001004	+	0	0	1	0	1	1.58e-07	1.07e-06	7.68614	1000	Ncor2	Ncor2	protein_coding
chr2	218659001	218660001		3784	-241	ENSRNOG00000013683	-	0	0	1	0	0	2.68e-05	0.000101455	7.68525	1000	S1pr1	S1pr1	protein_coding
chr4	57506001	57507001		6114	-42324	ENSRNOG00000035451	-	0	0	0	0	0	2.97e-05	0.00011109	7.67682	1000	Mir183	Mir183	miRNA
chr12	47174001	47175001		16821	-4665	ENSRNOG00000001173	+	0	0	1	0	0	0.00195188	0.00415806	7.67412	1000	Cabp1	Cabp1	protein_coding
chr3	123715001	123716001		5072	2433	ENSRNOG00000021247	-	0	1	0	1	1	0.00523398	0.00971049	7.66966	1000	Spef1	Spef1	protein_coding
chr4	115601001	115602001		6438	0	ENSRNOG00000014501	+	1	0	1	1	1	6.15e-08	4.61e-07	7.66275	1000	Zfp638	Zfp638	protein_coding
chr18	14756001	14757001		20715	0	ENSRNOG00000047261	+	1	0	1	1	1	2.93e-14	9.5e-13	7.66163	1000	AABR07031445.1	Mapre2	protein_coding
chrX	37129001	37130001		22876	102594	ENSRNOG00000032132	+	0	0	0	0	0	4.85e-06	2.26e-05	7.66124	1000	AABR07037998.1	Adgrg2	protein_coding
chr19	26052001	26053001		21544	763	ENSRNOG00000003469	-	0	0	1	1	1	0.000115804	0.000361301	7.66116	1000	MAST1	MAST1	protein_coding
chr6	28463001	28464001		8943	119	ENSRNOG00000012950	-	0	0	1	0	1	1.7e-06	9.04e-06	7.65167	1000	Efr3b	Dnajc27	protein_coding
chr12	38876001	38877001		16596	2233	ENSRNOG00000057941	+	0	0	1	0	1	8.2e-05	0.000266947	7.64031	1000	AABR07036331.1	Tmem120b	lincRNA
chr17	22863001	22864001		20189	0	ENSRNOG00000031495	-	0	0	1	1	1	3.25e-07	2.06e-06	7.63889	1000	Tmem170b	Tmem170b	protein_coding
chr5	160023001	160024001		8368	13580	ENSRNOG00000010436	+	0	0	0	1	0	0.000812132	0.00194087	7.63275	1000	Zbtb17	Zbtb17	protein_coding
chr1	106998001	106999001		1106	0	ENSRNOG00000016147	+	1	0	1	1	0	4.54e-10	5.66e-09	7.62905	1000	Slc17a6	Slc17a6	protein_coding
chr5	167109001	167110001		8501	0	ENSRNOG00000017528	+	1	0	1	1	0	8.19e-08	5.99e-07	7.62333	1000	Gpr157	Gpr157	protein_coding
chr4	71713001	71714001		6207	0	ENSRNOG00000017149	-	1	0	1	1	0	1.31e-14	4.65e-13	7.62249	1000	Fam131b	Fam131b	protein_coding
chrX	24873001	24874001		22842	-17157	ENSRNOG00000024250	+	0	0	0	0	0	5.69e-07	3.41e-06	7.60977	1000	Wwc3	Clcn4	protein_coding
chr10	83333001	83334001		14665	-151	ENSRNOG00000005185	-	0	0	1	0	0	1.32e-10	1.87e-09	7.60946	1000	Nxph3	Nxph3	protein_coding
chr17	57021001	57022001		20405	-9767	ENSRNOG00000014900	+	0	0	0	0	0	1.67e-14	5.8e-13	7.60945	1000	Crem	Crem	protein_coding
chr4	70825001	70826001		6203	-2895	ENSRNOG00000014312	+	0	0	1	0	0	6.31e-05	0.000214136	7.60155	1000	AC109737.1	Prss1	protein_coding
chr8	31984001	31985001		11611	15379	ENSRNOG00000009892	-	0	0	0	1	1	0.000407475	0.00107026	7.59693	1000	Adamts15	Adamts15	protein_coding
chr10	74910001	74911001		14571	0	ENSRNOG00000056793	+	0	0	1	1	1	0.000465848	0.00120321	7.5927	1000	Hsf5	Mtmr4	protein_coding
chr2	220298001	220299001		3799	0	ENSRNOG00000016872	+	1	0	1	1	0	1.98e-11	3.29e-10	7.5892	1000	Plppr4	Plppr4	protein_coding
chr1	125502001	125503001		1153	134722	ENSRNOG00000016358	+	0	0	0	0	1	0.00281747	0.005718	7.58421	1000	Apba2	Apba2	protein_coding
chr18	70192001	70193001		21127	0	ENSRNOG00000014614	+	1	0	1	1	1	4.64e-05	0.000163579	7.58294	1000	Cxxc1	Cxxc1	protein_coding
chr14	44478001	44479001		18013	-615	ENSRNOG00000002643	+	0	0	1	0	0	5.71e-05	0.000195937	7.57576	1000	Ugdh	Ugdh	protein_coding
chr4	57625001	57626001		6116	0	ENSRNOG00000048205	-	1	0	1	1	1	1.1e-29	8.13e-27	7.57531	1000	Ube2h	Ube2h	protein_coding
chr11	36513001	36514001		15600	15493	ENSRNOG00000001629	+	0	0	0	1	1	1.41e-11	2.46e-10	7.57369	1000	Get1	Wrb	protein_coding
chrX	156999001	157000001		23117	0	ENSRNOG00000053172	-	1	0	1	1	1	6.61e-08	4.93e-07	7.56962	1000	Ssr4	Ssr4	protein_coding
chr19	56053001	56054001		21916	143	ENSRNOG00000028904	-	0	0	1	0	1	4.83e-09	4.68e-08	7.56757	1000	Vps9d1	Vps9d1	protein_coding
chr5	173152001	173153001		8685	0	ENSRNOG00000017829	+	1	0	1	1	0	2.31e-09	2.4e-08	7.56045	1000	Ssu72	Ssu72	protein_coding
chr5	166629001	166630001		8489	-974	ENSRNOG00000016846	-	0	0	1	0	0	2.61e-11	4.25e-10	7.55417	1000	Pik3cd	Pik3cd	protein_coding
chr2	219693001	219694001		3794	0	ENSRNOG00000015502	-	1	0	1	1	1	1.12e-05	4.72e-05	7.54628	1000	Mfsd14a	Mfsd14a	protein_coding
chr8	76940001	76941001		12079	0	ENSRNOG00000060750	-	1	0	1	1	1	6.69e-45	2.98e-41	7.53753	1000	Rnf111	Rnf111	protein_coding
chr9	10216001	10217001		12681	0	ENSRNOG00000045846	+	1	0	1	1	1	8.16e-05	0.000266036	7.53623	1000	Rfx2	Rfx2	protein_coding
chr8	71167001	71168001		12028	0	ENSRNOG00000015896	+	1	0	1	1	1	3.43e-11	5.48e-10	7.53605	1000	Rbpms2	Rbpms2	protein_coding
chr6	47853001	47854001		9050	-4927	ENSRNOG00000008299	-	0	0	1	0	0	7.01e-07	4.1e-06	7.5357	1000	Dcdc2c	Allc	protein_coding
chr9	49487001	49488001		13045	7865	ENSRNOG00000038909	+	0	0	0	0	0	0.00031449	0.000850483	7.53131	1000	Pou3f3	Pou3f3	protein_coding
chr12	36653001	36654001		16526	14545	ENSRNOG00000057823	+	0	0	0	0	0	0.00412186	0.00792902	7.53055	1000	Ubc	Ubc	protein_coding
chr7	123576001	123577001		10939	-1879	ENSRNOG00000008461	+	1	0	1	1	1	0.000135743	0.000414209	7.52794	1000	Smdt1	Pheta2	protein_coding
chr19	25245001	25246001		21494	5328	ENSRNOG00000006741	+	0	0	0	1	1	0.000161462	0.000480571	7.51131	1000	Podnl1	Cc2d1a	protein_coding
chr6	28464001	28465001		8944	0	ENSRNOG00000012950	-	1	0	1	1	1	5.2e-14	1.55e-12	7.50924	1000	Efr3b	Dnajc27	protein_coding
chr8	31041001	31042001		11608	-455640	ENSRNOG00000014719	+	0	0	0	0	0	6.26e-06	2.83e-05	7.50643	1000	Snx19	Snx19	protein_coding
chr1	198360001	198361001		1680	0	ENSRNOG00000020010	+	1	0	1	1	0	7.32e-08	5.4e-07	7.50507	1000	Kctd13	Kctd13	protein_coding
chr1	222229001	222230001		2089	0	ENSRNOG00000021151	+	1	0	1	1	0	1.67e-09	1.81e-08	7.50452	1000	Ppp1r14b	Ppp1r14b	protein_coding
chr20	10386001	10387001		22331	0	ENSRNOG00000029528	-	1	0	1	1	1	1.06e-09	1.2e-08	7.5039	1000	Cbs	Cbs	protein_coding
chr17	66511001	66512001		20446	0	ENSRNOG00000018046	-	1	0	1	1	1	2.64e-15	1.09e-13	7.50087	1000	Lgals8	Lgals8	protein_coding
chr8	96564001	96565001		12212	0	ENSRNOG00000013229	+	1	0	1	1	1	1.38e-12	2.98e-11	7.49417	1000	Mthfs	Mthfs	protein_coding
chr11	68989001	68990001		15736	0	ENSRNOG00000038761	-	1	0	1	1	1	8.63e-08	6.27e-07	7.48377	1000	Hacd2	Adcy5	protein_coding
chr2	187175001	187176001		3443	-2319	ENSRNOG00000057702	+	0	0	1	1	1	0.002602	0.00533345	7.4804	1000	Insrr	Insrr	protein_coding
chr9	14015001	14016001		12757	-137872	ENSRNOG00000011803	-	0	0	0	0	0	7.1e-08	5.25e-07	7.48038	1000	Lrfn2	Lrfn2	protein_coding
chr1	11911001	11912001		71	3624	ENSRNOG00000052007	-	0	0	1	0	0	3.12e-09	3.18e-08	7.47933	1000	AABR07000392.1	LOC310926	misc_RNA
chr19	10130001	10131001		21308	7160	ENSRNOG00000013465	-	0	0	0	1	1	0.00143146	0.00317045	7.47214	1000	Tepp	Tepp	protein_coding
chr8	99880001	99881001		12230	0	ENSRNOG00000008151	+	1	0	1	1	1	0.000115425	0.000360202	7.46705	1000	Plscr4	Plscr4	protein_coding
chr4	100043001	100044001		6375	55518	ENSRNOG00000010716	-	0	0	0	0	0	2.03e-06	1.05e-05	7.46679	1000	Atoh8	Atoh8	protein_coding
chr7	11981001	11982001		9976	142	ENSRNOG00000018271	-	0	0	1	0	1	6.09e-14	1.79e-12	7.46347	1000	Scamp4	Scamp4	protein_coding
chr1	222674001	222675001		2111	1501	ENSRNOG00000032042	+	0	1	0	1	1	1.34e-13	3.65e-12	7.46165	1000	RGD1560108	RGD1560108	protein_coding
chr2	57802001	57803001		2992	-73042	ENSRNOG00000030748	-	0	0	0	0	0	5.58e-16	2.66e-14	7.46026	1000	AABR07008421.1	Slc1a3	processed_pseudogene
chr3	148188001	148189001		5231	-26541	ENSRNOG00000021750	+	0	0	0	0	1	0.000112862	0.000352846	7.45368	1000	Id1	Id1	protein_coding
chr3	60676001	60677001		4602	-4681	ENSRNOG00000056244	+	0	0	1	0	0	2.24e-06	1.15e-05	7.45283	1000	AABR07052541.1	Atf2	lincRNA
chr6	103314001	103315001		9344	-928	ENSRNOG00000058646	-	0	0	1	0	0	5.03e-09	4.86e-08	7.44849	1000	Zfp36l1	Zfp36l1	protein_coding
chr1	191984001	191985001		1629	0	ENSRNOG00000018599	-	1	0	1	1	1	1.52e-08	1.3e-07	7.43257	1000	Gga2	Gga2	protein_coding
chr16	20108001	20109001		19363	-201	ENSRNOG00000059970	+	0	0	1	1	1	0.00343337	0.00678018	7.42784	1000	AABR07024869.1	Jak3	protein_coding
chr1	198210001	198211001		1670	0	ENSRNOG00000019721	+	1	0	1	1	1	5.12e-11	7.87e-10	7.42344	1000	Ypel3	Ypel3	protein_coding
chr18	79258001	79259001		21221	0	ENSRNOG00000016654	-	1	0	1	1	0	6.38e-07	3.77e-06	7.41894	1000	Galr1	Galr1	protein_coding
chr8	116369001	116370001		12386	-7659	ENSRNOG00000016512	-	0	0	0	0	0	4.97e-10	6.11e-09	7.41611	1000	Sema3b	Lrrc34	protein_coding
chr8	76080001	76081001		12073	23392	ENSRNOG00000060351	-	0	0	0	0	0	0.00137001	0.00305618	7.4139	1000	AABR07070587.1	Foxb1	lincRNA
chr8	130358001	130359001		12597	7492	ENSRNOG00000047853	+	0	0	0	0	0	1.4e-06	7.64e-06	7.4136	1000	Ss18l2	Klhl40	protein_coding
chr5	61734001	61735001		7366	0	ENSRNOG00000009724	-	1	0	1	1	1	3.65e-19	3.18e-17	7.41039	1000	Tstd2	Ncbp1	protein_coding
chr10	91254001	91255001		14958	0	ENSRNOG00000003207	+	1	0	1	1	1	3.69e-05	0.00013353	7.4093	1000	Fmnl1	Fmnl1	protein_coding
chr13	47614001	47615001		17102	8850	ENSRNOG00000004470	-	0	0	0	1	1	1.25e-08	1.1e-07	7.40005	1000	Il24	Il24	protein_coding
chr17	60947001	60948001		20423	-576	ENSRNOG00000018698	-	0	0	1	0	0	2.14e-16	1.13e-14	7.39816	1000	Wac	Wac	protein_coding
chr10	86849001	86850001		14816	-10686	ENSRNOG00000009972	+	0	0	0	0	0	2.43e-12	5e-11	7.39676	1000	Rara	Rara	protein_coding
chr15	87904001	87905001		19033	17219	ENSRNOG00000024125	+	0	0	0	1	1	0.00340786	0.0067378	7.39535	1000	Slain1	Slain1	protein_coding
chr3	162167001	162168001		5467	0	ENSRNOG00000029470	-	0	0	1	1	1	1.37e-10	1.93e-09	7.39231	1000	LOC685619	Slc2a10	protein_coding
chr8	118923001	118924001		12456	-2479	ENSRNOG00000027880	+	0	0	1	0	1	1.19e-05	4.99e-05	7.38975	1000	Nbeal2	Ccdc12	protein_coding
chr6	42656001	42657001		9013	0	ENSRNOG00000005344	+	1	0	1	1	1	1.02e-11	1.86e-10	7.38895	1000	Nol10	Nol10	protein_coding
chr19	25886001	25887001		21532	27690	ENSRNOG00000002983	-	0	0	0	1	1	6.35e-06	2.87e-05	7.38096	1000	Nfix	Nf1x	protein_coding
chr5	78447001	78448001		7469	18333	ENSRNOG00000024501	+	0	0	0	0	1	7.24e-09	6.78e-08	7.37815	1000	Rgs3	Rgs3	protein_coding
chr1	116587001	116588001		1126	0	ENSRNOG00000015734	+	1	0	1	1	0	8.09e-16	3.72e-14	7.37646	1000	Ube3a	Ube3a	protein_coding
chr20	33521001	33522001		22598	0	ENSRNOG00000061091	-	1	0	1	1	0	0.00111738	0.00256555	7.37427	1000	AABR07045071.1	Gopc	protein_coding
chr7	12975001	12976001		10100	833	ENSRNOG00000008026	+	1	0	1	1	1	5.95e-05	0.000203328	7.36877	1000	C2cd4c	C2cd4c	protein_coding
chr1	282235001	282236001		2654	0	ENSRNOG00000036572	-	1	0	1	1	1	4.34e-08	3.37e-07	7.36544	1000	Sfxn4	Sfxn4	protein_coding
chr9	80166001	80167001		13211	0	ENSRNOG00000017206	-	1	0	1	1	0	3.01e-09	3.09e-08	7.36219	1000	Igfbp5	Igfbp5	protein_coding
chr5	135399001	135400001		7739	-1411	ENSRNOG00000029152	-	0	0	1	0	0	1.58e-11	2.74e-10	7.35051	1000	Tmem69	Tmem69	protein_coding
chr13	73385001	73386001		17298	-423	ENSRNOG00000003595	-	0	0	1	0	1	0.00165661	0.00360538	7.34147	1000	Lhx4	Lhx4	protein_coding
chr5	169468001	169469001		8580	-849	ENSRNOG00000010893	-	0	0	1	0	0	7.65e-10	8.95e-09	7.34028	1000	Hes3	Hes3	protein_coding
chr9	10294001	10295001		12683	-22	ENSRNOG00000050381	-	0	0	1	0	0	0.000199078	0.000575476	7.33608	1000	Dus3l	Dus3l	protein_coding
chr6	115547001	115548001		9495	-33648	ENSRNOG00000004458	-	0	0	0	0	0	3.31e-21	4.5e-19	7.32918	1000	Ston2	Ston2	protein_coding
chr3	2801001	2802001		4091	1575	ENSRNOG00000033863	-	0	0	1	1	0	3.33e-05	0.000122389	7.32545	1000	Ajm1	Phpt1	protein_coding
chr12	37409001	37410001		16547	1526	ENSRNOG00000052704	-	0	0	0	1	1	0.000211261	0.000605317	7.32273	1000	Atp6v0a2	Atp6v0a2	protein_coding
chr18	81808001	81809001		21259	-375	ENSRNOG00000015142	-	0	0	1	0	0	1.46e-12	3.13e-11	7.3216	1000	Timm21	Timm21	protein_coding
chr1	237062001	237063001		2216	-2754	ENSRNOG00000032137	+	0	0	1	0	0	9.95e-08	7.12e-07	7.31699	1000	Foxb2	Foxb2	protein_coding
chr19	14661001	14662001		21355	7804	ENSRNOG00000014761	+	0	0	0	1	1	0.00319435	0.0063708	7.30769	1000	Rasd2	Rasd2	protein_coding
chr2	98610001	98611001		3098	0	ENSRNOG00000008765	-	1	0	1	1	0	0.00402614	0.00778313	7.29854	1000	Zfhx4	Zfhx4	protein_coding
chr18	29141001	29142001		20843	16574	ENSRNOG00000049067	+	0	0	0	0	0	7.56e-05	0.000249835	7.29011	1000	Igip	Nrg2	protein_coding
chr4	341001	342001		5774	-303	ENSRNOG00000006859	+	0	0	1	0	0	1.99e-06	1.04e-05	7.28507	1000	Insig1	Insig1	protein_coding
chr10	103807001	103808001		15161	8288	ENSRNOG00000003280	-	0	0	0	1	1	7.81e-08	5.72e-07	7.28442	1000	Grin2c	Grin2c	protein_coding
chr3	95698001	95699001		4830	-8387	ENSRNOG00000004410	+	0	0	0	0	0	0.00114637	0.00262263	7.27512	1000	Pax6	Pax6	protein_coding
chr2	227095001	227096001		3831	0	ENSRNOG00000014654	+	1	0	1	1	1	1.01e-10	1.46e-09	7.27487	1000	LOC691807	LOC691807	protein_coding
chr7	121595001	121596001		10895	73215	ENSRNOG00000060407	+	0	0	0	1	1	0.00445076	0.00846863	7.26693	1000	Cacna1i	Cacna1i	processed_transcript
chr14	80489001	80490001		18168	-14644	ENSRNOG00000061022	-	0	0	0	0	0	0.00026588	0.00073711	7.26599	1000	AC108312.2	Hmx1	lincRNA
chr2	128818001	128819001		3238	101	ENSRNOG00000056513	+	0	0	1	1	0	5.96e-35	6.62e-32	7.26242	1000	5_8S_rRNA	RGD1359508	rRNA
chr13	50917001	50918001		17161	-20	ENSRNOG00000003300	-	0	0	1	0	0	6.62e-13	1.54e-11	7.25682	1000	Btg2	Btg2	protein_coding
chr5	152589001	152590001		8150	0	ENSRNOG00000016776	-	1	0	1	1	0	0.00129059	0.00290462	7.25415	1000	Extl1	Extl1	protein_coding
chr3	9682001	9683001		4249	131	ENSRNOG00000058329	+	1	0	1	1	1	2e-17	1.3e-15	7.24896	1000	Prrx2	Prrx2	protein_coding
chr10	74723001	74724001		14568	473	ENSRNOG00000006661	-	0	0	1	1	1	7e-05	0.00023391	7.2488	1000	Rad51c	Rad51c	protein_coding
chr4	78374001	78375001		6248	2881	ENSRNOG00000042229	+	1	0	1	1	1	3.49e-09	3.5e-08	7.24862	1000		Gimap1	protein_coding
chrX	63343001	63344001		22924	0	ENSRNOG00000006515	+	1	0	1	1	1	2.75e-10	3.63e-09	7.2486	1000	Klhl15	Klhl15	protein_coding
chr2	206997001	206998001		3706	0	ENSRNOG00000019957	-	1	0	1	1	1	5.14e-09	4.96e-08	7.24794	1000	Lrig2	Lrig2	protein_coding
chr2	30360001	30361001		2843	0	ENSRNOG00000018067	+	1	0	1	1	1	0.000284401	0.00078099	7.24681	1000	Smn1	Smn1	protein_coding
chr3	11102001	11103001		4283	0	ENSRNOG00000023352	-	1	0	1	1	0	8.05e-36	9.76e-33	7.24063	1000	Fam78a	Plpp7	protein_coding
chr1	80397001	80398001		568	13952	ENSRNOG00000017448	+	0	0	0	1	1	5.15e-05	0.000179097	7.23144	1000	Exoc3l2	Trappc6a	protein_coding
chr1	32364001	32365001		188	-19	ENSRNOG00000017302	-	0	0	1	0	0	2.81e-10	3.71e-09	7.2256	1000	Slc6a3	Slc6a3	protein_coding
chrX	155863001	155864001		23102	-527	ENSRNOG00000055562	-	0	0	1	0	0	1.59e-10	2.21e-09	7.22481	1000	Dkc1	Dkc1	protein_coding
chr1	210740001	210741001		1816	-402	ENSRNOG00000016737	-	0	0	1	0	0	0.00321347	0.00640281	7.20968	1000	Tcerg1l	Tcerg1l	protein_coding
chr5	35902001	35903001		7175	0	ENSRNOG00000028185	-	1	0	1	1	1	3.46e-05	0.000126644	7.20503	1000	Tstd3	Usp45	protein_coding
chr3	147113001	147114001		5203	29577	ENSRNOG00000009588	-	1	0	0	1	1	0.00241929	0.00501053	7.20141	1000	Snph	Snph	protein_coding
chr10	38987001	38988001		13977	-1536	ENSRNOG00000007652	-	0	0	1	0	0	0.000940267	0.00220211	7.19896	1000	Il13	Il13	protein_coding
chr16	20297001	20298001		19372	0	ENSRNOG00000018822	+	1	0	1	1	1	3.62e-05	0.000131732	7.19387	1000	Slc5a5	Slc5a5	protein_coding
chr10	73286001	73287001		14540	6883	ENSRNOG00000003517	+	0	0	0	1	1	1.92e-23	3.83e-21	7.19323	1000	Tbx2	Tbx2	protein_coding
chr8	117354001	117355001		12419	0	ENSRNOG00000035456	-	0	0	1	1	0	0.000100493	0.000318372	7.19298	1000	Mir3555	Mir3555	miRNA
chr8	25900001	25901001		11586	3565	ENSRNOG00000016181	-	0	0	0	1	1	4.6e-05	0.000162427	7.19104	1000	Tbx20	Tbx20	protein_coding
chr12	52376001	52377001		16968	16692	ENSRNOG00000030721	+	0	0	0	1	1	0.000591176	0.00147575	7.18949	1000	Fbrsl1	Lrcol1	protein_coding
chr5	78563001	78564001		7470	79098	ENSRNOG00000024501	+	0	0	0	0	1	0.00127378	0.0028737	7.18936	1000	Rgs3	Rgs3	protein_coding
chr4	22425001	22426001		5940	0	ENSRNOG00000008012	-	1	0	1	1	1	0.00411472	0.00791935	7.18507	1000	Abcb4	Abcb1a	protein_coding
chr6	12157001	12158001		8845	-21228	ENSRNOG00000040110	+	0	0	0	0	0	1.64e-13	4.41e-12	7.18409	1000	Foxn2	Ppp1r21	protein_coding
chr6	130016001	130017001		9599	-29052	ENSRNOG00000053121	+	0	0	0	0	0	4.32e-06	2.04e-05	7.18098	1000	AABR07065466.1	Vrk1	snoRNA
chr8	129246001	129247001		12583	4893	ENSRNOG00000019007	+	0	0	0	0	0	0.00247316	0.0051023	7.17703	1000	Rpl14	Rpl14	protein_coding
chr3	57817001	57818001		4553	0	ENSRNOG00000009781	+	1	0	1	1	0	1.72e-12	3.65e-11	7.17616	1000	Dync1i2	Dync1i2	protein_coding
chr10	63731001	63732001		14392	0	ENSRNOG00000003846	+	1	0	1	1	1	2.17e-17	1.4e-15	7.16894	1000	Pitpna	Pitpna	protein_coding
chr4	98648001	98649001		6352	0	ENSRNOG00000006069	+	1	0	1	1	0	1.17e-07	8.21e-07	7.16892	1000	Eif2ak3	Eif2ak3	protein_coding
chr8	107601001	107602001		12278	264	ENSRNOG00000022704	-	0	0	1	1	1	5.17e-12	1e-10	7.16872	1000	Esyt3	Mras	protein_coding
chr1	80746001	80747001		592	-1171	ENSRNOG00000043416	-	0	0	1	0	0	0.0025405	0.00522265	7.16084	1000	Bcl3	Bcl3	protein_coding
chr16	21131001	21132001		19464	0	ENSRNOG00000052111	-	1	0	1	1	1	1.05e-07	7.46e-07	7.14871	1000	Sugp1	Sugp1	protein_coding
chr1	266075001	266076001		2498	0	ENSRNOG00000019509	+	1	0	1	1	0	2.79e-07	1.8e-06	7.14826	1000	Fbxl15	Fbxl15	protein_coding
chr17	37461001	37462001		20296	102249	ENSRNOG00000052547	+	0	0	0	0	0	0.00207403	0.00438467	7.1453	1000	LOC103694082	Sox4	lincRNA
chr3	161970001	161971001		5461	32589	ENSRNOG00000018747	-	0	0	0	0	1	1.65e-08	1.4e-07	7.14482	1000	LOC102555457	Cdh22	protein_coding
chr5	160509001	160510001		8392	45084	ENSRNOG00000028064	-	0	0	0	1	1	0.000366799	0.000976134	7.14434	1000	Fhad1	Efhd2	protein_coding
chr2	44869001	44870001		2923	5750	ENSRNOG00000039588	+	0	1	0	1	0	0.000466318	0.00120395	7.14273	1000	Mcidas	Ccno	protein_coding
chr1	37043001	37044001		224	-15413	ENSRNOG00000058077	+	0	0	0	0	0	1.09e-07	7.68e-07	7.13469	1000	AABR07001068.1	Adcy2	lincRNA
chr5	172307001	172308001		8656	0	ENSRNOG00000013468	-	1	0	1	1	1	0.000187947	0.000547572	7.13426	1000	Prxl2b	Prxl2b	protein_coding
chr3	2401001	2402001		4054	-3270	ENSRNOG00000024412	+	0	0	1	0	0	4.37e-14	1.33e-12	7.13237	1000	AABR07051240.1	Nrarp	processed_pseudogene
chr12	42483001	42484001		16717	8329	ENSRNOG00000008706	-	0	0	0	1	1	2.02e-18	1.55e-16	7.1316	1000	Tbx3	Tbx3	protein_coding
chr18	60719001	60720001		21056	-25036	ENSRNOG00000030321	+	0	1	0	1	0	0.00111139	0.00255311	7.12417	1000	LOC502176	LOC502176	protein_coding
chr1	80471001	80472001		574	0	ENSRNOG00000017692	-	1	0	1	1	0	8.18e-14	2.34e-12	7.12406	1000	Ppp1r37	Ppp1r37	protein_coding
chr5	159582001	159583001		8349	50	ENSRNOG00000008334	-	0	0	1	0	1	0.00181507	0.00390152	7.1175	1000	Crocc	Crocc	protein_coding
chr1	3769001	3770001		27	-5610	ENSRNOG00000023549	-	0	0	0	0	0	1.22e-08	1.07e-07	7.11656	1000	Samd5	Ctsm	protein_coding
chr11	87727001	87728001		15955	4652	ENSRNOG00000000288	+	0	0	0	1	1	9.44e-08	6.79e-07	7.1161	1000	Scarf2	Scarf2	protein_coding
chr2	123001	124001		2660	285925	ENSRNOG00000059722	-	0	0	0	0	0	0.00111521	0.00256101	7.11241	1000	5_8S_rRNA	Erap1	rRNA
chr5	172268001	172269001		8653	-4460	ENSRNOG00000012593	+	0	0	1	1	1	0.00278357	0.00565866	7.11089	1000	Mmel1	Mmel1	protein_coding
chr1	197886001	197887001		1659	0	ENSRNOG00000049181	-	1	0	1	1	1	5.83e-14	1.72e-12	7.10607	1000	Sh2b1	Sh2b1	protein_coding
chr16	39810001	39811001		19549	-16750	ENSRNOG00000048847	+	0	0	0	0	0	0.000731205	0.00177462	7.1054	1000	Wdr17	Spata4	protein_coding
chr15	20778001	20779001		18614	4064	ENSRNOG00000009694	-	1	0	0	1	1	8.17e-07	4.69e-06	7.10502	1000	Bmp4	Bmp4	protein_coding
chr3	153250001	153251001		5332	0	ENSRNOG00000006418	-	1	0	1	1	1	4.5e-05	0.000159165	7.10423	1000	Samhd1	Samhd1	protein_coding
chr12	37047001	37048001		16538	0	ENSRNOG00000001011	-	1	0	1	1	1	0.00378423	0.00737372	7.09794	1000	Rflna	Rflna	protein_coding
chr2	24386001	24387001		2766	-25197	ENSRNOG00000058293	-	0	0	0	0	0	4.67e-06	2.18e-05	7.09765	1000	LOC108349922	Tbca	lincRNA
chr10	105451001	105452001		15237	229	ENSRNOG00000010083	-	0	0	1	1	1	0.000109366	0.000343383	7.09614	1000	Prpsap1	Prpsap1	protein_coding
chr7	126464001	126465001		11005	724	ENSRNOG00000015750	-	0	0	1	0	1	6.25e-07	3.7e-06	7.09552	1000	Wnt7b	Wnt7b	protein_coding
chr10	13515001	13516001		13689	0	ENSRNOG00000006136	-	1	0	1	1	1	4.95e-22	7.95e-20	7.09413	1000	Pdpk1	Pdpk1	protein_coding
chr4	115799001	115800001		6441	85998	ENSRNOG00000032788	+	0	0	0	0	1	3.89e-06	1.85e-05	7.07537	1000	Dysf	Dysf	protein_coding
chr3	152465001	152466001		5308	9512	ENSRNOG00000043645	+	0	0	0	1	0	2.17e-17	1.4e-15	7.0741	1000	AABR07054401.1	Scand1	miRNA
chr1	87073001	87074001		771	6713	ENSRNOG00000020389	+	0	0	0	1	1	4.71e-21	6.09e-19	7.07203	1000	Capn12	Capn12	protein_coding
chr1	260135001	260136001		2358	1442	ENSRNOG00000061439	+	0	0	0	0	0	1.48e-11	2.57e-10	7.0692	1000	U4	Zfp518a	snRNA
chr7	63044001	63045001		10428	729	ENSRNOG00000024027	-	0	0	1	1	1	4.91e-19	4.22e-17	7.06859	1000	Lemd3	Lemd3	protein_coding
chr10	27975001	27976001		13874	1321	ENSRNOG00000003680	+	1	0	0	1	1	0.000400487	0.00105482	7.06816	1000	Gabrb2	Gabrb2	protein_coding
chr14	82213001	82214001		18203	-13709	ENSRNOG00000016427	+	0	0	0	0	0	0.00475373	0.00895413	7.06508	1000	Letm1	Letm1	protein_coding
chr1	197778001	197779001		1655	0	ENSRNOG00000017621	-	1	0	1	1	1	1.62e-08	1.38e-07	7.06012	1000	Spns1	Spns1	protein_coding
chr1	253054001	253055001		2320	-53242	ENSRNOG00000021916	-	0	0	0	0	0	0.000542829	0.00137377	7.05413	1000	Slc16a12	Slc16a12	protein_coding
chr2	201284001	201285001		3660	-4358	ENSRNOG00000019565	+	0	0	1	0	0	1.4e-06	7.66e-06	7.05157	1000	Tbx15	Tbx15	protein_coding
chr10	9869001	9870001		13607	-550231	ENSRNOG00000041962	+	0	0	0	0	0	0.00214873	0.00452038	7.05056	1000	5S_rRNA	Eef2kmt	rRNA
chr6	26821001	26822001		8908	-43	ENSRNOG00000008047	-	0	1	1	1	1	0.000686829	0.00168319	7.04681	1000	Khk	Khk	protein_coding
chr13	73389001	73390001		17300	394	ENSRNOG00000003595	-	0	0	1	0	1	4.44e-06	2.09e-05	7.04488	1000	Lhx4	Lhx4	protein_coding
chr1	80496001	80497001		577	8064	ENSRNOG00000049605	+	0	0	0	1	1	5.09e-05	0.000176904	7.04312	1000	Zfp296	Gemin7	protein_coding
chr14	80911001	80912001		18177	0	ENSRNOG00000009313	+	1	0	1	1	1	6.18e-09	5.86e-08	7.04178	1000	Lrpap1	Lrpap1	protein_coding
chr3	3325001	3326001		4096	0	ENSRNOG00000017283	+	0	0	1	1	1	0.000588771	0.00147168	7.04107	1000	Kcnt1	Kcnt1	protein_coding
chr7	144900001	144901001		11408	468	ENSRNOG00000036835	+	1	0	1	1	1	2.57e-06	1.29e-05	7.03958	1000	Copz1	Copz1	protein_coding
chr6	135894001	135895001		9701	3071	ENSRNOG00000010165	+	0	0	0	1	1	7.47e-05	0.000247368	7.03579	1000	Tnfaip2	Tnfaip2	protein_coding
chr4	99398001	99399001		6365	0	ENSRNOG00000007272	+	1	0	1	1	0	3.31e-20	3.71e-18	7.03474	1000	Rnf103	Rnf103	protein_coding
chr5	146090001	146091001		7973	582	ENSRNOG00000047495	-	0	0	1	0	0	2e-05	7.81e-05	7.03237	1000	AABR07049948.1	LOC682102	miRNA
chr4	39517001	39518001		6011	0	ENSRNOG00000006206	+	1	0	1	1	1	1.11e-21	1.61e-19	7.03026	1000	Tmem106b	Tmem106b	protein_coding
chr19	12912001	12913001		21344	29944	ENSRNOG00000013742	-	0	0	0	0	1	0.000737503	0.00178815	7.02793	1000	Large1	Large1	protein_coding
chr10	84169001	84170001		14701	1671	ENSRNOG00000008191	+	0	1	0	1	0	0.000628639	0.00155501	7.02381	1000	Hoxb4	Hoxb4	protein_coding
chr1	61699001	61700001		348	-12058	ENSRNOG00000047128	-	0	0	0	0	0	0.000564285	0.00141872	7.01649	1000	Vom1r23	Zfp52	protein_coding
chr8	81750001	81751001		12107	-1706	ENSRNOG00000053321	+	0	0	1	0	0	0.00493765	0.00924959	7.01465	1000	AABR07070720.1	Onecut1	protein_coding
chr2	209161001	209162001		3733	0	ENSRNOG00000017744	+	1	0	1	1	1	7.46e-11	1.11e-09	7.0132	1000	Dram2	Dram2	protein_coding
chr5	144177001	144178001		7919	-195	ENSRNOG00000024566	-	0	0	1	0	0	0.00141404	0.00313811	7.01117	1000	Sh3d21	Sh3d21	protein_coding
chr10	88667001	88668001		14856	0	ENSRNOG00000018790	-	1	0	1	1	1	1.61e-11	2.77e-10	7.00131	1000	Kcnh4	Kcnh4	protein_coding
chr16	80595001	80596001		19798	-5974	ENSRNOG00000042114	+	0	0	0	0	0	1.43e-10	2.01e-09	6.99728	1000	Erich1	Dlgap2	protein_coding
chr5	172809001	172810001		8675	0	ENSRNOG00000016385	-	1	0	1	1	1	6.52e-10	7.76e-09	6.98383	1000	Gabrd	Gabrd	protein_coding
chr9	92291001	92292001		13317	0	ENSRNOG00000016640	-	1	0	1	1	0	1.16e-06	6.44e-06	6.98198	1000	Dner	Trip12	protein_coding
chr1	267504001	267505001		2538	-337	ENSRNOG00000012641	+	0	0	1	0	1	1.7e-10	2.35e-09	6.98152	1000	Sfr1	Sfr1	protein_coding
chr16	49185001	49186001		19590	0	ENSRNOG00000010785	+	0	0	1	1	1	4.99e-06	2.31e-05	6.9808	1000	Helt	Slc25a4	protein_coding
chr16	19225001	19226001		19311	0	ENSRNOG00000014205	-	0	0	1	1	0	1.64e-16	8.78e-15	6.96727	1000	Klf2	Klf2	protein_coding
chr5	59427001	59428001		7313	10926	ENSRNOG00000014838	+	0	0	0	0	1	3.02e-05	0.000112596	6.96677	1000	Glipr2	Ccin	protein_coding
chr4	95503001	95504001		6337	4999	ENSRNOG00000006383	+	0	0	0	0	0	2.27e-16	1.19e-14	6.96332	1000	Atoh1	Atoh1	protein_coding
chr11	30050001	30051001		15506	104	ENSRNOG00000021569	-	0	0	1	1	1	0.00322664	0.00642521	6.95742	1000	Tiam1	Tiam1	protein_coding
chr15	37155001	37156001		18780	-15053	ENSRNOG00000008734	+	0	0	0	0	0	4.34e-20	4.67e-18	6.94478	1000	Zmym2	Pspc1	protein_coding
chr1	146037001	146038001		1321	0	ENSRNOG00000012366	+	1	0	1	1	1	9.73e-05	0.000310011	6.94043	1000	Mesd	Mesd	protein_coding
chrX	75071001	75072001		22963	-88853	ENSRNOG00000040357	-	0	0	0	0	0	5.4e-15	2.06e-13	6.93476	1000	Mir672	Mir672	miRNA
chr3	21957001	21958001		4403	-25842	ENSRNOG00000030143	+	0	0	0	0	0	2.39e-09	2.49e-08	6.92978	1000	AABR07051796.1	Strbp	protein_coding
chr1	274392001	274393001		2564	70	ENSRNOG00000014705	+	1	0	1	1	1	4.96e-06	2.3e-05	6.92686	1000	Rbm20	Rbm20	protein_coding
chr18	69943001	69944001		21125	633	ENSRNOG00000015401	-	1	0	1	1	1	0.00436401	0.00833208	6.92617	1000	Mapk4	Mapk4	protein_coding
chr13	73377001	73378001		17297	6580	ENSRNOG00000003595	-	0	0	0	0	1	0.00456548	0.00865821	6.92614	1000	Lhx4	Lhx4	protein_coding
chr7	139484001	139485001		11174	-5	ENSRNOG00000058560	-	0	0	1	0	0	7.8e-06	3.43e-05	6.91736	1000	Col2a1	Col2a1	protein_coding
chr10	94207001	94208001		15011	0	ENSRNOG00000008078	+	1	0	1	1	1	0.000155485	0.000464774	6.91289	1000	Kcnh6	Kcnh6	protein_coding
chr1	221015001	221016001		2026	0	ENSRNOG00000020726	-	1	0	1	1	1	0.00437694	0.0083553	6.90032	1000	Sipa1	Sipa1	protein_coding
chr5	158301001	158302001		8310	11427	ENSRNOG00000018739	-	0	0	0	0	1	1.73e-08	1.46e-07	6.89771	1000	Pax7	Pax7	protein_coding
chr12	2233001	2234001		16034	4332	ENSRNOG00000001003	+	0	1	0	1	0	0.00333121	0.0066137	6.8943	1000	Trappc5	Trappc5	protein_coding
chr10	89863001	89864001		14899	-28663	ENSRNOG00000055322	+	0	0	0	0	0	6.74e-08	5.01e-07	6.88998	1000	AC098160.1	Sost	pseudogene
chrX	72515001	72516001		22952	0	ENSRNOG00000003063	-	1	0	1	1	0	1.13e-10	1.61e-09	6.88644	1000	Phka1	Phka1	protein_coding
chr1	5164001	5165001		32	860	ENSRNOG00000014290	-	1	0	1	1	1	3.35e-07	2.12e-06	6.88517	1000	Grm1	Grm1	protein_coding
chr10	103847001	103848001		15165	36	ENSRNOG00000021380	-	1	0	1	1	1	1.15e-06	6.41e-06	6.88492	1000	Fads6	Fads6	protein_coding
chr3	11921001	11922001		4321	0	ENSRNOG00000015845	+	1	0	1	1	1	1.16e-12	2.54e-11	6.8802	1000	Niban2	Niban2	protein_coding
chr7	140678001	140679001		11223	-37049	ENSRNOG00000060728	-	0	0	0	0	0	0.000243246	0.000682589	6.87919	1000	Tuba1a	Tuba1a	protein_coding
chr1	194249001	194250001		1641	-162097	ENSRNOG00000060965	-	0	0	0	0	0	5.17e-14	1.54e-12	6.87661	1000	AC117118.1	Nupr1	snoRNA
chr12	328001	329001		15990	18107	ENSRNOG00000059668	-	0	0	0	0	0	8.55e-15	3.11e-13	6.87511	1000	5_8S_rRNA	Brca2	rRNA
chr5	133860001	133861001		7713	-3799	ENSRNOG00000025051	+	0	0	1	0	0	1.83e-06	9.64e-06	6.87207	1000	Tal1	Tal1	protein_coding
chr9	41292001	41293001		12954	-2910	ENSRNOG00000014035	+	0	0	1	0	0	1.72e-09	1.86e-08	6.86977	1000	Arhgef4	Fam168b	protein_coding
chr7	99525001	99526001		10663	42127	ENSRNOG00000056796	+	0	0	0	0	0	5.68e-13	1.33e-11	6.86738	1000	5_8S_rRNA	Sqle	rRNA
chr3	170549001	170550001		5616	-315	ENSRNOG00000005246	+	0	0	1	0	0	0.00188307	0.00403016	6.86573	1000	Tfap2c	Tfap2c	protein_coding
chr6	108595001	108596001		9425	447	ENSRNOG00000012094	-	0	0	1	1	1	1.77e-07	1.19e-06	6.86144	1000	Ltbp2	Ltbp2	protein_coding
chr5	58476001	58477001		7290	0	ENSRNOG00000009535	-	1	0	1	1	1	2.86e-06	1.42e-05	6.84898	1000	Stoml2	Stoml2	protein_coding
chr14	3506001	3507001		17713	0	ENSRNOG00000002093	+	1	0	1	1	1	1.57e-27	5.8e-25	6.84877	1000	Tgfbr3	Tgfbr3	protein_coding
chr4	81311001	81312001		6276	0	ENSRNOG00000011944	+	1	0	1	1	1	6.8e-07	3.98e-06	6.83231	1000	Snx10	Snx10	protein_coding
chr8	108110001	108111001		12293	-201	ENSRNOG00000022084	-	0	0	1	0	0	9.61e-05	0.000306317	6.83158	1000	Sox14	Sox14	protein_coding
chr7	22453001	22454001		10159	18	ENSRNOG00000051635	-	0	0	1	1	0	3.96e-15	1.55e-13	6.82911	1000	5_8S_rRNA	Vom2r57	rRNA
chr4	161720001	161721001		6850	0	ENSRNOG00000042939	+	0	0	1	1	1	0.00016781	0.000496607	6.81791	1000	Nrip2	Itfg2	protein_coding
chr4	447001	448001		5783	8334	ENSRNOG00000006846	+	0	0	0	0	0	0.0018042	0.00388254	6.81622	1000	En2	En2	protein_coding
chr7	28957001	28958001		10241	490	ENSRNOG00000005228	+	0	0	1	0	1	8.88e-05	0.000285642	6.80314	1000	Gnptab	Dram1	protein_coding
chr7	119464001	119465001		10817	-17273	ENSRNOG00000006940	+	0	0	0	0	0	0.00230808	0.00480933	6.80081	1000	Ncf4	Ncf4	protein_coding
chr14	60552001	60553001		18068	0	ENSRNOG00000029064	-	1	0	1	1	1	1.55e-08	1.32e-07	6.79561	1000	Zcchc4	Zcchc4	protein_coding
chr3	123776001	123777001		5075	0	ENSRNOG00000025295	+	1	0	1	1	1	6.18e-07	3.67e-06	6.7934	1000	Mavs	Mavs	protein_coding
chrX	123254001	123255001		23039	0	ENSRNOG00000009746	-	1	0	1	1	1	9.55e-06	4.11e-05	6.78742	1000	Akap17b	Pgrmc1	protein_coding
chr10	15165001	15166001		13763	458	ENSRNOG00000019692	-	0	0	1	1	1	0.000341427	0.000916639	6.78736	1000	Metrn	Metrn	protein_coding
chr8	117622001	117623001		12436	1685	ENSRNOG00000053889	+	0	0	0	1	0	0.00495657	0.00927851	6.78242	1000	Celsr3	Celsr3	protein_coding
chr20	47395001	47396001		22697	0	ENSRNOG00000037647	+	1	0	1	1	1	4.18e-10	5.24e-09	6.77829	1000	Ostm1	Ostm1	protein_coding
chr18	55771001	55772001		20999	0	ENSRNOG00000019536	-	1	0	1	1	1	4.39e-16	2.13e-14	6.77449	1000	Smim3	Smim3	protein_coding
chr19	55861001	55862001		21907	13097	ENSRNOG00000054676	-	0	0	0	0	0	1.76e-13	4.67e-12	6.7725	1000	U3	Lhx9	snoRNA
chr1	140535001	140536001		1226	0	ENSRNOG00000018515	-	1	0	1	1	1	2.01e-15	8.64e-14	6.77016	1000	Det1	Det1	protein_coding
chr4	67034001	67035001		6182	8353	ENSRNOG00000059708	-	0	0	0	0	0	3.36e-07	2.12e-06	6.76326	1000	U6	Chmp4bl1	snRNA
chr14	86674001	86675001		18316	185	ENSRNOG00000027864	+	0	0	1	0	1	9.84e-11	1.42e-09	6.75775	1000	Ppia	Ppia	protein_coding
chr16	4471001	4472001		19201	1534	ENSRNOG00000015618	+	0	0	0	0	1	7.9e-05	0.000259072	6.75614	1000	Wnt5a	Wnt5a	protein_coding
chr18	44664001	44665001		20954	-51227	ENSRNOG00000026136	+	0	0	0	0	0	1.88e-05	7.44e-05	6.75603	1000	Tnfaip8	Tnfaip8	protein_coding
chr3	118428001	118429001		4989	-151	ENSRNOG00000037124	-	0	0	1	0	0	9.36e-07	5.34e-06	6.75571	1000	Fam227b	Fam227b	protein_coding
chr14	85772001	85773001		18297	0	ENSRNOG00000010706	-	1	0	1	1	1	2.56e-32	2.44e-29	6.75458	1000	Ccdc117	Ccdc117	protein_coding
chr3	160559001	160560001		5418	1742	ENSRNOG00000013681	-	1	0	0	1	1	0.000151497	0.000454276	6.754	1000	Kcns1	Kcns1	protein_coding
chr2	20152001	20153001		2725	0	ENSRNOG00000016342	-	1	0	1	1	1	8.37e-18	5.88e-16	6.74957	1000	Atg10	Atg10	protein_coding
chr12	17904001	17905001		16300	0	ENSRNOG00000039296	-	0	0	1	1	1	0.00507647	0.00946973	6.74736	1000	LOC680273	LOC498155	protein_coding
chr7	41811001	41812001		10341	-11854	ENSRNOG00000060920	-	0	0	0	0	0	0.00397669	0.00770371	6.74728	1000	AABR07056802.1	Dusp6	lincRNA
chr12	39881001	39882001		16631	0	ENSRNOG00000001269	-	1	0	1	1	1	2.05e-17	1.34e-15	6.74605	1000	Ppp1cc	Ppp1cc	protein_coding
chr10	61692001	61693001		14338	6357	ENSRNOG00000002894	+	0	0	0	1	1	9.08e-10	1.05e-08	6.74394	1000	Mnt	Mnt	protein_coding
chr1	220265001	220266001		1992	0	ENSRNOG00000020009	-	1	0	1	1	1	3.11e-06	1.52e-05	6.74255	1000	Npas4	Npas4	protein_coding
chr5	171439001	171440001		8625	-1561	ENSRNOG00000014805	+	0	0	1	0	0	1.66e-10	2.3e-09	6.7414	1000	Wrap73	Wrap73	protein_coding
chr5	100982001	100983001		7511	-4100	ENSRNOG00000010484	-	0	0	1	0	0	5.85e-07	3.5e-06	6.73925	1000	Zdhhc21	Zdhhc21	protein_coding
chr11	42858001	42859001		15621	0	ENSRNOG00000001689	+	1	0	1	1	1	8.16e-10	9.52e-09	6.73033	1000	Arl6	Arl6	protein_coding
chr12	24638001	24639001		16412	-12315	ENSRNOG00000048699	+	0	0	0	0	0	5.53e-06	2.53e-05	6.72873	1000	Vps37d	Vps37d	protein_coding
chr19	19832001	19833001		21407	0	ENSRNOG00000024212	-	1	0	1	1	1	1.16e-12	2.54e-11	6.71995	1000	Tent4b	Tent4b	protein_coding
chr7	2480001	2481001		9832	691	ENSRNOG00000002642	+	0	0	1	0	1	5.02e-06	2.33e-05	6.71243	1000	Ptges3	Ptges3	protein_coding
chr16	71810001	71811001		19733	0	ENSRNOG00000017231	+	1	0	1	1	1	2.97e-15	1.2e-13	6.70859	1000	Adam9	Adam9	protein_coding
chr1	97632001	97633001		930	0	ENSRNOG00000017456	+	1	0	1	1	1	9.4e-14	2.63e-12	6.70833	1000	Vstm2b	Vstm2b	protein_coding
chr2	12252001	12253001		2712	59288	ENSRNOG00000049010	-	0	0	0	0	0	3.41e-05	0.000125191	6.70646	1000	AABR07007399.1	Cetn3	protein_coding
chr7	123963001	123964001		10951	0	ENSRNOG00000022932	+	1	0	1	1	1	0.000115231	0.000359766	6.70552	1000	Serhl2	Serhl2	protein_coding
chr17	14826001	14827001		20105	1330	ENSRNOG00000016915	-	0	0	0	1	1	0.00377157	0.00735441	6.70437	1000	Barx1	Barx1	protein_coding
chr8	22035001	22036001		11514	0	ENSRNOG00000020679	+	1	0	1	1	1	3.89e-10	4.91e-09	6.70398	1000	Icam1	Icam1	protein_coding
chr3	61565001	61566001		4611	15599	ENSRNOG00000001589	-	0	0	0	0	0	0.000409272	0.0010735	6.70096	1000	Evx2	Hoxd13	protein_coding
chr12	39184001	39185001		16607	169	ENSRNOG00000001331	-	0	0	1	0	1	2.19e-05	8.48e-05	6.69321	1000	Rnf34	Rnf34	protein_coding
chr10	67013001	67014001		14463	-20741	ENSRNOG00000057512	-	0	0	0	0	1	9.75e-06	4.19e-05	6.67841	1000	U6	Mir193	snRNA
chr7	120295001	120296001		10841	0	ENSRNOG00000010821	-	1	0	1	1	1	1.23e-15	5.49e-14	6.6731	1000	Ankrd54	Ankrd54	protein_coding
chr3	58177001	58178001		4566	-3536	ENSRNOG00000055605	-	0	0	1	0	0	5.56e-09	5.32e-08	6.66995	1000	AABR07052500.1	Dlx2	pseudogene
chr5	139208001	139209001		7819	18197	ENSRNOG00000032639	-	0	0	0	1	1	1.21e-09	1.35e-08	6.66722	1000	Foxo6	Edn2	protein_coding
chr2	142234001	142235001		3273	67	ENSRNOG00000013660	-	0	0	1	1	1	0.000554791	0.00139827	6.66695	1000	Cog6	Cog6	protein_coding
chr1	141452001	141453001		1249	-927	ENSRNOG00000026857	-	0	0	1	0	0	2.32e-06	1.19e-05	6.66519	1000	Kif7	Plin1	protein_coding
chr5	39251001	39252001		7190	0	ENSRNOG00000007506	+	1	0	1	1	1	3.44e-20	3.76e-18	6.66236	1000	Ndufaf4	Ndufaf4	protein_coding
chr14	13056001	13057001		17834	1173	ENSRNOG00000002004	-	0	0	0	1	1	2.02e-09	2.14e-08	6.66199	1000	Prdm8	Fgf5	protein_coding
chr11	60907001	60908001		15671	0	ENSRNOG00000002044	+	1	0	1	1	1	2.29e-15	9.65e-14	6.65959	1000	Gtpbp8	Gtpbp8	protein_coding
chr16	82438001	82439001		19828	442	ENSRNOG00000031681	-	0	0	1	1	0	0.00223615	0.00468066	6.6532	1000	AABR07026539.1	Tubgcp3	protein_coding
chr8	81767001	81768001		12115	961	ENSRNOG00000008095	+	0	0	1	1	1	1.81e-05	7.18e-05	6.65289	1000	Onecut1	Onecut1	protein_coding
chr19	26006001	26007001		21540	0	ENSRNOG00000003307	-	1	0	1	1	1	2.37e-06	1.21e-05	6.64414	1000	Gcdh	Gcdh	protein_coding
chr20	25992001	25993001		22497	1346	ENSRNOG00000026466	+	0	1	0	1	1	4.07e-05	0.000145646	6.64071	1000	Lrrtm3	Lrrtm3	protein_coding
chr16	20057001	20058001		19359	-4759	ENSRNOG00000059288	-	0	0	1	1	1	0.00519375	0.00965207	6.64029	1000	AC122603.2	Colgalt1	pseudogene
chr12	41400001	41401001		16669	14761	ENSRNOG00000050848	+	0	0	0	1	1	0.00133939	0.00299891	6.63871	1000	Dtx1	Rasal1	protein_coding
chr15	58711001	58712001		18968	0	ENSRNOG00000038228	-	1	0	1	1	1	1.56e-29	9.2e-27	6.63413	1000	Serp2	Serp2	protein_coding
chr20	8696001	8697001		22301	0	ENSRNOG00000059659	+	1	0	1	1	1	1.14e-09	1.28e-08	6.62728	1000	Zfand3	Zfand3	protein_coding
chr2	204441001	204442001		3682	13394	ENSRNOG00000054375	+	0	0	0	0	0	0.00103509	0.00239808	6.62647	1000	Nhlh2	Nhlh2	protein_coding
chr12	52377001	52378001		16969	17692	ENSRNOG00000030721	+	0	0	0	1	0	3.52e-09	3.53e-08	6.62502	1000	Fbrsl1	Lrcol1	protein_coding
chr10	62483001	62484001		14361	0	ENSRNOG00000057619	-	0	0	1	1	1	0.0015389	0.00337922	6.62429	1000	LOC100912068	Olr1515	protein_coding
chr12	30727001	30728001		16487	656	ENSRNOG00000023643	-	0	0	1	0	1	1.16e-19	1.17e-17	6.62397	1000	Mmp17	Mmp17	protein_coding
chr1	42587001	42588001		246	0	ENSRNOG00000018690	-	1	0	1	1	1	3.89e-15	1.53e-13	6.61873	1000	Rgs17	Rgs17	protein_coding
chr3	10269001	10270001		4266	0	ENSRNOG00000009139	-	1	0	1	1	1	4.36e-11	6.8e-10	6.61289	1000	Fubp3	Ccdc146	protein_coding
chr4	723001	724001		5788	3692	ENSRNOG00000006120	-	0	0	0	0	1	9.87e-05	0.000313512	6.6125	1000	Shh	Shh	protein_coding
chr5	27285001	27286001		7142	-26929	ENSRNOG00000005673	+	0	0	0	0	0	5.28e-05	0.000182961	6.60902	1000	Runx1t1	Runx1t1	protein_coding
chr1	72356001	72357001		416	0	ENSRNOG00000016279	+	1	0	1	1	1	1.45e-09	1.59e-08	6.60741	1000	Zfp865	Zfp865	protein_coding
chr3	7161001	7162001		4159	2655	ENSRNOG00000010981	-	0	0	0	1	1	2.44e-06	1.24e-05	6.60593	1000	Gtf3c5	Gtf3c5	protein_coding
chr10	65820001	65821001		14452	0	ENSRNOG00000022657	-	1	0	1	1	1	3.93e-10	4.96e-09	6.60377	1000	Tmem97	Tmem97	protein_coding
chr17	36177001	36178001		20291	0	ENSRNOG00000027125	-	1	0	1	1	1	1.45e-10	2.02e-09	6.60259	1000	Mboat1	Mboat1	protein_coding
chr9	14314001	14315001		12761	19179	ENSRNOG00000051897	-	0	0	0	0	0	0.00524338	0.00972355	6.5993	1000		Unc5cl	snoRNA
chr8	21509001	21510001		11489	9014	ENSRNOG00000034037	-	0	0	0	0	0	0.00187514	0.00401576	6.59722	1000	Zfp266	Zfp426	protein_coding
chr14	34728001	34729001		17941	87	ENSRNOG00000046829	+	0	0	1	0	1	8.47e-06	3.69e-05	6.58966	1000	Kdr	Kdr	protein_coding
chr9	15328001	15329001		12776	14479	ENSRNOG00000046316	+	0	0	0	1	1	1.65e-06	8.82e-06	6.58887	1000	Tomm6	Frs3	protein_coding
chr10	86890001	86891001		14822	0	ENSRNOG00000051691	-	0	0	1	1	0	2.3e-08	1.9e-07	6.58651	1000	Gjd3	Rara	protein_coding
chr7	117129001	117130001		10754	-204	ENSRNOG00000032574	-	0	1	1	1	1	1.77e-06	9.35e-06	6.58638	1000	Scrib	Scrib	protein_coding
chr3	126337001	126338001		5104	1139	ENSRNOG00000021276	+	1	0	0	1	1	2.8e-11	4.53e-10	6.58444	1000	Bmp2	Bmp2	protein_coding
chr5	159534001	159535001		8346	0	ENSRNOG00000008257	+	1	0	1	1	1	0.000863705	0.00204907	6.5727	1000	Mfap2	Mfap2	protein_coding
chr19	53017001	53018001		21814	-4363	ENSRNOG00000047483	-	0	0	1	0	0	5.96e-08	4.5e-07	6.57013	1000	AABR07044018.1	Fendrr	miRNA
chr17	87392001	87393001		20602	117058	ENSRNOG00000008666	+	0	0	0	0	1	0.00314519	0.00628649	6.56886	1000	Etl4	Arhgap21	protein_coding
chr20	30761001	30762001		22553	-11062	ENSRNOG00000000565	-	0	0	0	0	0	2.84e-06	1.41e-05	6.56411	1000	Sgpl1	Sgpl1	protein_coding
chr1	243664001	243665001		2262	1179	ENSRNOG00000016301	+	0	0	0	1	1	1.05e-07	7.49e-07	6.56139	1000	Dmrt2	Dmrt2	protein_coding
chr12	39395001	39396001		16615	43	ENSRNOG00000001296	-	1	0	1	1	1	0.00231407	0.00482032	6.56088	1000	P2rx7	P2rx7	protein_coding
chr2	201277001	201278001		3659	-11358	ENSRNOG00000019565	+	0	0	0	0	0	0.00155049	0.00339684	6.55903	1000	Tbx15	Tbx15	protein_coding
chr7	122157001	122158001		10901	0	ENSRNOG00000018655	+	1	0	1	1	1	6.73e-11	9.99e-10	6.55229	1000	Adsl	Adsl	protein_coding
chr8	61823001	61824001		11898	0	ENSRNOG00000018577	-	1	0	1	1	1	2.42e-07	1.57e-06	6.55145	1000	Neil1	Neil1	protein_coding
chr16	73152001	73153001		19736	0	ENSRNOG00000042690	-	1	0	1	1	1	0.000367828	0.000978326	6.55051	1000	Zmat4	Zmat4	protein_coding
chr1	102415001	102416001		1070	377	ENSRNOG00000055401	+	1	0	1	1	0	3.23e-20	3.68e-18	6.5487	1000	Kcnc1	Kcnc1	protein_coding
chr2	44856001	44857001		2918	-214	ENSRNOG00000010454	+	0	0	1	0	0	1.2e-08	1.06e-07	6.53672	1000	Ccno	Ccno	protein_coding
chr3	113377001	113378001		4951	19	ENSRNOG00000015018	+	1	0	1	1	1	1.17e-05	4.92e-05	6.53289	1000	Pdia3	Pdia3	protein_coding
chr19	14508001	14509001		21351	0	ENSRNOG00000014117	+	1	0	1	1	1	3.3e-05	0.00012147	6.52217	1000	Hmox1	Rab36	protein_coding
chr10	13077001	13078001		13676	-1138	ENSRNOG00000003721	-	0	1	1	1	1	0.00224016	0.00468751	6.51798	1000	Paqr4	Paqr4	protein_coding
chr9	82147001	82148001		13239	-128	ENSRNOG00000017856	-	0	0	1	0	0	1.37e-05	5.61e-05	6.51728	1000	Fev	Fev	protein_coding
chr1	64333001	64334001		362	-2363	ENSRNOG00000054831	-	0	0	1	1	1	5.43e-05	0.000187656	6.51514	1000	Mir935	Mir935	miRNA
chr1	179010001	179011001		1563	0	ENSRNOG00000012258	-	1	0	1	1	0	3.02e-15	1.21e-13	6.51473	1000	Rras2	Rras2	protein_coding
chr10	85477001	85478001		14748	39684	ENSRNOG00000011475	-	0	0	0	1	1	6.34e-07	3.75e-06	6.51346	1000	Srcin1	Srcin1	protein_coding
chr3	176282001	176283001		5737	0	ENSRNOG00000010312	-	1	0	1	1	0	1.16e-05	4.86e-05	6.50971	1000	Bhlhe23	Bhlhe23	protein_coding
chr3	22643001	22644001		4413	2398	ENSRNOG00000010551	+	0	0	0	1	1	7.65e-05	0.000252544	6.50666	1000	Lhx2	Lhx2	protein_coding
chr7	117040001	117041001		10745	694	ENSRNOG00000047521	-	0	0	1	1	1	0.00133306	0.00298674	6.50376	1000	Ccdc166	Ccdc166	protein_coding
chr5	153756001	153757001		8193	17074	ENSRNOG00000018576	-	0	0	0	0	0	8.27e-06	3.62e-05	6.50331	1000	Rcan3	Ncmap	protein_coding
chr4	77710001	77711001		6230	-3008	ENSRNOG00000033639	-	0	0	1	0	0	3.24e-16	1.6e-14	6.50301	1000	Zfp777	Zfp777	protein_coding
chr4	183294001	183295001		6986	-3	ENSRNOG00000056041	-	0	0	1	0	0	3.43e-10	4.4e-09	6.50181	1000	AABR07062570.1	Sinhcaf	protein_coding
chr3	168124001	168125001		5589	0	ENSRNOG00000050932	+	1	0	1	1	1	1.46e-11	2.55e-10	6.50129	1000	Pfdn4	Cyp24a1	protein_coding
chr14	59734001	59735001		18060	451	ENSRNOG00000046327	-	0	0	1	0	1	1.92e-11	3.21e-10	6.5	1000	Rbpj	Rbpj	protein_coding
chr20	26677001	26678001		22498	-77912	ENSRNOG00000061040	+	0	0	0	0	0	4.84e-10	5.98e-09	6.5	1000	Herc4	Herc4	protein_coding
chr1	72580001	72581001		437	0	ENSRNOG00000016930	+	1	0	1	1	1	3.93e-06	1.87e-05	6.49097	1000	Ube2s	Ube2s	protein_coding
chr12	38870001	38871001		16593	-656	ENSRNOG00000001337	-	0	0	1	0	0	3.5e-19	3.09e-17	6.48567	1000	Setd1b	Hpd	protein_coding
chr7	124041001	124042001		10954	0	ENSRNOG00000009592	-	1	0	1	1	1	4.41e-12	8.71e-11	6.48075	1000	Cyb5r3	Cyb5r3	protein_coding
chr1	218196001	218197001		1926	76207	ENSRNOG00000053867	-	0	0	0	0	0	0.000713885	0.00173847	6.47979	1000	AC098981.1	Ccnd1	lincRNA
chr6	99283001	99284001		9299	152	ENSRNOG00000005602	+	1	0	1	1	1	1.54e-07	1.05e-06	6.47649	1000	Mthfd1	Mthfd1	protein_coding
chr10	31418001	31419001		13898	236	ENSRNOG00000006557	-	0	0	1	0	1	1.56e-06	8.39e-06	6.47383	1000	Cyfip2	Cyfip2	protein_coding
chr11	30118001	30119001		15509	-66899	ENSRNOG00000021569	-	0	0	0	0	0	0.005152	0.00959184	6.47037	1000	Tiam1	Tiam1	protein_coding
chr7	2505001	2506001		9834	0	ENSRNOG00000058093	+	0	0	1	1	1	0.000138138	0.00042017	6.46396	1000		Atp5f1b	snoRNA
chr10	18130001	18131001		13839	563	ENSRNOG00000004976	-	0	0	1	1	1	1.83e-06	9.63e-06	6.46347	1000	Tlx3	Npm1	protein_coding
chr4	49439001	49440001		6046	0	ENSRNOG00000060349	-	1	0	1	1	1	1.29e-09	1.43e-08	6.46116	1000	Fam3c	Fam3c	protein_coding
chr9	7466001	7467001		12652	433	ENSRNOG00000056784	-	0	0	1	0	0	9.5e-08	6.82e-07	6.45832	1000	5_8S_rRNA	Vom2r76	rRNA
chr10	67064001	67065001		14467	997	ENSRNOG00000035658	-	0	0	1	0	0	1.2e-09	1.34e-08	6.45819	1000	Mir193a	Mir193	miRNA
chr3	56803001	56804001		4541	288	ENSRNOG00000056087	+	0	0	1	1	1	0.00322106	0.00641601	6.4546	1000	Erich2	Erich2	protein_coding
chr17	72240001	72241001		20487	0	ENSRNOG00000019223	+	1	0	1	1	1	1.48e-07	1.01e-06	6.4532	1000	Atp5f1c	Taf3	protein_coding
chr15	58654001	58655001		18967	0	ENSRNOG00000001030	+	1	0	1	1	1	3.13e-16	1.56e-14	6.45234	1000	Tsc22d1	Tsc22d1	protein_coding
chr1	140536001	140537001		1227	-68	ENSRNOG00000018515	-	0	0	1	0	0	1.85e-05	7.32e-05	6.45005	1000	Det1	Det1	protein_coding
chr5	171262001	171263001		8621	0	ENSRNOG00000025030	-	1	0	1	1	1	4.1e-10	5.15e-09	6.44998	1000	Dffb	Cep104	protein_coding
chr1	100322001	100323001		951	0	ENSRNOG00000019207	+	0	0	1	1	1	4.28e-09	4.21e-08	6.44935	1000	Shank1	Shank1	protein_coding
chr8	49573001	49574001		11765	0	ENSRNOG00000016308	-	1	0	1	1	1	1.03e-05	4.4e-05	6.44854	1000	Il10ra	Il10ra	protein_coding
chr1	134335001	134336001		1205	65	ENSRNOG00000051332	-	0	0	1	1	0	0.00407273	0.00785098	6.44779	1000	AABR07004259.1	Rgma	processed_pseudogene
chrX	140879001	140880001		23074	786	ENSRNOG00000000861	+	0	0	1	1	1	0.00182521	0.0039208	6.44651	1000	Zic3	Zic3	protein_coding
chr10	75335001	75336001		14578	0	ENSRNOG00000050323	+	1	0	1	1	1	7.62e-18	5.41e-16	6.44648	1000	Srsf1	Srsf1	protein_coding
chr11	70753001	70754001		15756	0	ENSRNOG00000001786	-	1	0	1	1	1	6.4e-26	1.94e-23	6.44469	1000	Snx4	Snx4	protein_coding
chr3	118051001	118052001		4985	0	ENSRNOG00000008629	-	1	0	1	1	1	5.38e-15	2.06e-13	6.44375	1000	Secisbp2l	Secisbp2l	protein_coding
chr5	76151001	76152001		7445	162	ENSRNOG00000015340	+	0	0	1	1	1	2.16e-05	8.39e-05	6.44299	1000	Dnajc25	Dnajc25	protein_coding
chr10	56364001	56365001		14228	85	ENSRNOG00000028834	-	1	0	1	1	1	2.97e-11	4.8e-10	6.43994	1000	Polr2a	Slc35g3	protein_coding
chr14	43703001	43704001		18002	-8418	ENSRNOG00000029461	-	0	0	0	0	0	1.06e-05	4.49e-05	6.43753	1000	AABR07072400.1	Rbm47	protein_coding
chr14	85951001	85952001		18299	0	ENSRNOG00000011979	-	1	0	1	1	1	6.96e-08	5.16e-07	6.43337	1000	Mrps24	Mrps24	protein_coding
chr3	124896001	124897001		5093	0	ENSRNOG00000021265	+	1	0	1	1	1	1.14e-18	9.02e-17	6.43256	1000	Cds2	Cds2	protein_coding
chr17	18152001	18153001		20152	20	ENSRNOG00000001455	+	1	0	1	1	1	0.00217039	0.0045602	6.43091	1000	Kif13a	Kif13a	protein_coding
chr11	81379001	81380001		15846	0	ENSRNOG00000001815	-	1	0	1	1	1	2.53e-29	1.35e-26	6.42975	1000	Eif4a2	Eif4a2	protein_coding
chr2	56163001	56164001		2980	-11471	ENSRNOG00000033192	-	0	0	0	0	0	9.83e-05	0.000312701	6.42552	1000	Osmr	Osmr	protein_coding
chr13	52190001	52191001		17191	6206	ENSRNOG00000007369	-	0	1	0	1	0	1.34e-07	9.25e-07	6.42467	1000	Shisa4	Shisa4	protein_coding
chr11	88037001	88038001		15964	519	ENSRNOG00000030452	-	0	0	1	1	0	0.000150063	0.000450991	6.42301	1000	Rimbp3	Ube2l3	protein_coding
chr7	24004001	24005001		10170	0	ENSRNOG00000005350	-	1	0	1	1	1	1.7e-11	2.91e-10	6.42272	1000	Pwp1	Pwp1	protein_coding
chr5	133786001	133787001		7711	0	ENSRNOG00000007775	-	1	0	1	1	1	7.96e-15	2.93e-13	6.41636	1000	Cmpk1	Cmpk1	protein_coding
chr3	58164001	58165001		4560	0	ENSRNOG00000001520	+	1	0	1	1	0	4.18e-05	0.00014929	6.41509	1000	Dlx1	Dlx1	protein_coding
chr8	39305001	39306001		11658	0	ENSRNOG00000006075	+	1	0	1	1	1	3.88e-17	2.4e-15	6.4145	1000	Fez1	Fez1	protein_coding
chr18	15490001	15491001		20723	0	ENSRNOG00000015895	+	0	0	1	1	1	0.00119928	0.00272638	6.41378	1000	B4galt6	B4galt6	protein_coding
chr7	12432001	12433001		10039	0	ENSRNOG00000014625	-	1	0	1	1	1	4.63e-10	5.75e-09	6.41185	1000	Atp5f1d	Cbarp	protein_coding
chr20	18594001	18595001		22438	0	ENSRNOG00000000613	+	1	0	1	1	1	1.45e-10	2.02e-09	6.40687	1000	Tfam	Tfam	protein_coding
chr3	65814001	65815001		4670	-81	ENSRNOG00000004544	+	0	0	1	0	0	5.17e-12	1e-10	6.40633	1000	Ube2e3	Ube2e3	protein_coding
chr14	104192001	104193001		18383	485	ENSRNOG00000004888	+	0	0	1	0	1	1.02e-11	1.87e-10	6.40454	1000	Spred2	Spred2	protein_coding
chr16	20705001	20706001		19430	195	ENSRNOG00000020088	+	0	0	1	0	1	1.31e-06	7.2e-06	6.40238	1000	Klhl26	Klhl26	protein_coding
chr1	79831001	79832001		515	0	ENSRNOG00000013847	+	0	0	1	1	1	1.23e-10	1.75e-09	6.3974	1000	Nova2	Ccdc61	protein_coding
chr10	86931001	86932001		14823	-55	ENSRNOG00000053047	-	0	0	1	1	1	3.35e-06	1.63e-05	6.39714	1000	Top2a	Top2a	protein_coding
chr1	221087001	221088001		2032	0	ENSRNOG00000024239	-	1	1	1	1	1	2.22e-15	9.48e-14	6.38974	1000	Fam89b	Fam89b	protein_coding
chr10	38641001	38642001		13964	398	ENSRNOG00000016596	-	0	0	1	0	1	2.71e-05	0.000102284	6.38698	1000	Hspa4	Hspa4	protein_coding
chr3	159995001	159996001		5400	0	ENSRNOG00000009076	+	1	0	1	1	1	1.52e-05	6.16e-05	6.386	1000	Ttpal	Ttpal	protein_coding
chr3	95701001	95702001		4833	-5387	ENSRNOG00000004410	+	0	0	0	0	0	0.00400449	0.00774733	6.38528	1000	Pax6	Pax6	protein_coding
chr8	22184001	22185001		11524	-4601	ENSRNOG00000020828	+	0	0	1	0	0	6.55e-08	4.89e-07	6.38298	1000	Pde4a	Pde4a	protein_coding
chr17	9694001	9695001		20015	293	ENSRNOG00000021447	-	0	1	1	1	1	1.73e-07	1.16e-06	6.3797	1000	Prr7	Prr7	protein_coding
chr3	148203001	148204001		5232	-11541	ENSRNOG00000021750	+	0	0	0	0	0	1.45e-11	2.54e-10	6.37954	1000	Id1	Id1	protein_coding
chr1	87468001	87469001		785	0	ENSRNOG00000020703	-	1	0	1	1	0	4.49e-09	4.39e-08	6.37231	1000	Sipa1l3		protein_coding
chr15	108524001	108525001		19135	-1015	ENSRNOG00000012751	+	0	0	1	0	0	4.28e-06	2.03e-05	6.37183	1000	Tm9sf2	Tm9sf2	protein_coding
chr8	35689001	35690001		11639	-152405	ENSRNOG00000061559	-	0	0	0	0	0	2.27e-07	1.48e-06	6.37039	1000	LOC100359711	Kirrel3	lincRNA
chr15	57892001	57893001		18961	322	ENSRNOG00000001049	+	0	0	1	1	1	9.6e-08	6.89e-07	6.36885	1000	Tpt1	Tpt1	protein_coding
chr20	18876001	18877001		22444	42521	ENSRNOG00000000614	+	0	0	0	0	1	2.47e-05	9.43e-05	6.36743	1000	Bicc1	Bicc1	protein_coding
chr6	102215001	102216001		9335	0	ENSRNOG00000010650	+	1	0	1	1	1	9.05e-12	1.67e-10	6.36523	1000	Plekhh1	Plekhh1	protein_coding
chr10	47630001	47631001		14108	0	ENSRNOG00000038055	-	0	0	1	1	1	3.71e-05	0.000134379	6.3632	1000	Slc47a2	Slc47a2	protein_coding
chr8	127844001	127845001		12544	26193	ENSRNOG00000042259	-	0	0	0	0	0	1.08e-05	4.56e-05	6.36269	1000	AABR07071731.1	Mfsd8	protein_coding
chr14	103178001	103179001		18372	142271	ENSRNOG00000004606	-	0	0	0	0	0	2.62e-10	3.48e-09	6.3618	1000	Meis1	Meis1	protein_coding
chr9	76178001	76179001		13193	-261187	ENSRNOG00000032306	+	0	0	0	0	0	1.38e-12	2.97e-11	6.36053	1000	RGD1562431	Erbb4	protein_coding
chr13	113692001	113693001		17667	0	ENSRNOG00000045558	+	1	0	1	1	1	3.56e-05	0.000129738	6.35423	1000	Cd34	Cd34	protein_coding
chr3	3834001	3835001		4118	0	ENSRNOG00000026775	-	1	0	1	1	1	1.29e-11	2.3e-10	6.35293	1000	Pmpca	Pmpca	protein_coding
chr10	63677001	63678001		14390	0	ENSRNOG00000003835	+	1	0	1	1	1	1.95e-12	4.1e-11	6.34981	1000	Slc43a2	Slc43a2	protein_coding
chr13	89447001	89448001		17414	-13187	ENSRNOG00000046452	-	0	0	0	0	0	3.31e-06	1.61e-05	6.34872	1000	Fcgr2b	Cfap126	protein_coding
chr6	36107001	36108001		8984	0	ENSRNOG00000039551	+	1	0	1	1	1	1.42e-10	1.99e-09	6.34621	1000	Rdh14	Rdh14	protein_coding
chr5	123904001	123905001		7621	-167	ENSRNOG00000007410	+	0	0	1	0	0	3.27e-06	1.6e-05	6.34321	1000	Dab1	Dab1	protein_coding
chr20	22447001	22448001		22481	0	ENSRNOG00000000639	+	0	0	1	1	0	1.37e-11	2.4e-10	6.3419	1000	Ado	Ado	pseudogene
chr8	127601001	127602001		12534	-100535	ENSRNOG00000046257	+	0	0	0	0	0	8.99e-07	5.13e-06	6.34077	1000	Ctdspl	Mir26a	protein_coding
chr20	3396001	3397001		22048	40	ENSRNOG00000000816	-	1	0	1	1	1	1.47e-14	5.18e-13	6.3382	1000	Ppp1r18	Ppp1r18	protein_coding
chr8	28352001	28353001		11599	0	ENSRNOG00000009253	+	0	0	1	1	1	2.07e-05	8.06e-05	6.33568	1000	Igsf9b	Spata19	protein_coding
chr1	144829001	144830001		1313	-1524	ENSRNOG00000025142	+	0	0	1	0	0	3.71e-12	7.46e-11	6.3351	1000	Mex3b	Mex3b	protein_coding
chr12	38855001	38856001		16591	13347	ENSRNOG00000001337	-	0	0	0	1	1	0.000254129	0.000708656	6.3338	1000	Setd1b	Hpd	protein_coding
chr1	141551001	141552001		1254	369	ENSRNOG00000014925	+	0	0	1	1	1	0.00185409	0.00397834	6.32441	1000	Mesp2	Mesp2	protein_coding
chr15	108211001	108212001		19131	-176	ENSRNOG00000011969	-	0	0	1	0	0	0.000107005	0.000336605	6.31934	1000	Dock9	Dock9	protein_coding
chr15	43581001	43582001		18846	-21	ENSRNOG00000009815	+	0	0	1	0	0	3.12e-13	7.85e-12	6.30234	1000	Pnma2	Pnma2	protein_coding
chr15	42638001	42639001		18837	0	ENSRNOG00000016177	-	1	0	1	1	1	2.3e-10	3.09e-09	6.30226	1000	Scara3	Scara3	protein_coding
chr3	79498001	79499001		4707	0	ENSRNOG00000028215	+	0	0	1	1	1	0.00154187	0.00338296	6.30156	1000	Nup160	Nup160	protein_coding
chr2	196139001	196140001		3576	0	ENSRNOG00000021024	+	1	0	1	1	0	4.2e-14	1.29e-12	6.29902	1000	Pi4kb	Pi4kb	protein_coding
chr7	12518001	12519001		10049	0	ENSRNOG00000013604	-	1	1	1	1	1	3.65e-19	3.18e-17	6.29568	1000	Gpx4	Gpx4	protein_coding
chr10	93593001	93594001		15006	72870	ENSRNOG00000006548	+	0	0	0	0	1	2.45e-13	6.31e-12	6.29548	1000	Mrc2	Mrc2	protein_coding
chr15	44411001	44412001		18855	0	ENSRNOG00000025302	-	1	0	1	1	1	6.05e-19	5.11e-17	6.29391	1000	Cdca2	Kctd9	protein_coding
chr14	106869001	106870001		18421	-4110	ENSRNOG00000059469	-	0	0	1	0	0	0.00166027	0.00361067	6.29314	1000	Otx1	Otx1	protein_coding
chr10	20658001	20659001		13856	0	ENSRNOG00000007739	-	1	0	1	1	1	1.79e-05	7.13e-05	6.28829	1000	Rars1	Rars	protein_coding
chr14	82228001	82229001		18205	294	ENSRNOG00000016427	+	0	0	1	1	1	6.2e-11	9.28e-10	6.28646	1000	Letm1	Letm1	protein_coding
chr10	84954001	84955001		14725	-865	ENSRNOG00000023551	+	0	0	1	0	0	3.75e-05	0.000135315	6.28632	1000	Sp6	Sp6	protein_coding
chr4	26470001	26471001		5953	0	ENSRNOG00000016242	+	1	0	1	1	0	1.09e-11	1.98e-10	6.28462	1000	Fzd1	Fzd1	protein_coding
chr7	59970001	59971001		10396	-12770	ENSRNOG00000005362	-	0	0	0	0	0	6.23e-06	2.82e-05	6.28224	1000	Rab3ip	Rab3ip	protein_coding
chr6	50847001	50848001		9069	-37	ENSRNOG00000058692	-	0	0	1	0	0	5.7e-05	0.000195937	6.279	1000	Slc26a4	Slc26a4	protein_coding
chr4	7231001	7232001		5847	-2327	ENSRNOG00000012764	-	0	0	1	0	1	4.07e-06	1.93e-05	6.27869	1000	Agap3	Agap3	protein_coding
chr7	104913001	104914001		10683	-111957	ENSRNOG00000058733	-	0	0	0	0	0	2.97e-20	3.41e-18	6.27579	1000	Asap1	Asap1	protein_coding
chr3	177351001	177352001		5770	0	ENSRNOG00000017404	+	1	0	1	1	1	0.00256977	0.00527632	6.26894	1000	Pcmtd2	Pcmtd2	protein_coding
chr2	189592001	189593001		3531	222	ENSRNOG00000016379	+	0	0	1	1	1	2.81e-06	1.39e-05	6.26785	1000	Jtb	Jtb	protein_coding
chr19	25303001	25304001		21496	-12686	ENSRNOG00000035569	-	0	0	0	0	0	4.3e-12	8.53e-11	6.26385	1000	Mir181c	Mir181c	miRNA
chr9	8376001	8377001		12657	-22633	ENSRNOG00000048686	+	0	0	0	0	1	3.93e-13	9.45e-12	6.25823	1000	AABR07066379.1	Adgre4	protein_coding
chr5	133708001	133709001		7707	713	ENSRNOG00000007759	-	0	0	1	1	0	9.48e-21	1.16e-18	6.25661	1000	Foxd2	Foxe3	protein_coding
chr18	83471001	83472001		21261	0	ENSRNOG00000014006	+	1	0	1	1	0	5.5e-11	8.36e-10	6.25211	1000	Neto1	Neto1	protein_coding
chr5	2043001	2044001		6999	0	ENSRNOG00000031730	+	1	0	1	1	1	0.00442139	0.00842447	6.24858	1000	Eloc	Eloc	protein_coding
chr18	15856001	15857001		20726	0	ENSRNOG00000048101	+	1	0	1	1	1	0.000131866	0.000404229	6.24786	1000	Zfp397	Zfp397	protein_coding
chr1	256813001	256814001		2348	0	ENSRNOG00000015518	-	1	0	1	1	1	1.7e-14	5.89e-13	6.24747	1000	Rbp4	Rbp4	protein_coding
chr5	62109001	62110001		7373	0	ENSRNOG00000008945	+	1	0	1	1	1	8.71e-20	8.94e-18	6.2473	1000	Nans	Nans	protein_coding
chr16	59564001	59565001		19633	0	ENSRNOG00000053706	+	0	0	1	1	1	3.98e-37	5.9e-34	6.24617	1000	Lonrf1	Prag1	protein_coding
chr16	19052001	19053001		19303	37	ENSRNOG00000012287	+	0	0	1	1	1	1.07e-07	7.57e-07	6.24487	1000	Slc35e1	Slc35e1	protein_coding
chr3	59688001	59689001		4585	0	ENSRNOG00000060479	-	0	0	1	1	1	1.06e-08	9.51e-08	6.23761	1000	Sp3	LOC103695172	protein_coding
chr13	36530001	36531001		17063	-1759	ENSRNOG00000056580	+	0	0	1	0	0	4.71e-05	0.000165842	6.23543	1000	En1	C1ql2	protein_coding
chr2	202470001	202471001		3665	0	ENSRNOG00000019670	-	1	0	1	1	1	2.03e-09	2.15e-08	6.23341	1000	Wdr3	Gdap2	protein_coding
chr20	31433001	31434001		22569	-30519	ENSRNOG00000024751	-	0	0	0	0	0	0.00323085	0.00643264	6.23329	1000	Macroh2a2	H2afy2	protein_coding
chr2	63154001	63155001		3019	11510	ENSRNOG00000013535	-	0	0	0	0	1	0.00259814	0.00532718	6.22893	1000	Cdh6	Cdh6	protein_coding
chr1	141766001	141767001		1259	-941	ENSRNOG00000014278	+	0	0	1	0	0	5.71e-15	2.17e-13	6.228	1000	Zfp710	Echs1	protein_coding
chr11	86559001	86560001		15919	6980	ENSRNOG00000001892	+	0	0	0	1	1	3.74e-05	0.00013506	6.22649	1000	Tbx1	Tbx1	protein_coding
chr4	33908001	33909001		5996	0	ENSRNOG00000007804	+	1	0	1	1	1	7.17e-10	8.46e-09	6.2167	1000	C1galt1	C1galt1	protein_coding
chr15	18636001	18637001		18594	-3466	ENSRNOG00000039829	-	0	0	1	0	0	4.31e-05	0.000153294	6.21615	1000	Rpp14	Rpp14	protein_coding
chr5	173289001	173290001		8696	434	ENSRNOG00000019244	+	0	0	1	1	1	9.63e-09	8.7e-08	6.21565	1000	Mxra8	Mxra8	protein_coding
chr7	33008001	33009001		10270	-24763	ENSRNOG00000041450	-	0	0	0	0	0	2.97e-12	6.03e-11	6.2146	1000		Mir135a	miRNA
chr14	80958001	80959001		18179	0	ENSRNOG00000022419	-	1	0	1	1	1	1.05e-13	2.9e-12	6.21172	1000	Dok7	Dok7	protein_coding
chr7	120901001	120902001		10863	0	ENSRNOG00000014058	+	1	0	1	1	0	1.4e-09	1.54e-08	6.21084	1000	Tomm22	Tomm22	protein_coding
chr7	70365001	70366001		10484	189	ENSRNOG00000025584	+	0	0	1	1	1	1.08e-18	8.63e-17	6.20849	1000	Agap2	Agap2	protein_coding
chr1	226502001	226503001		2166	-82	ENSRNOG00000030180	-	0	0	1	0	0	0.000354754	0.00094765	6.195	1000	Lrrc10b	Lrrc10b	protein_coding
chr3	110442001	110443001		4891	0	ENSRNOG00000007925	+	1	0	1	1	0	1.46e-06	7.92e-06	6.19453	1000	Pak6	Pak6	protein_coding
chr15	3937001	3938001		18518	-76	ENSRNOG00000009783	+	0	0	1	0	1	9.27e-08	6.69e-07	6.19313	1000	Camk2g	Camk2g	protein_coding
chr1	24302001	24303001		147	0	ENSRNOG00000011815	-	1	0	1	1	0	9.08e-09	8.28e-08	6.19105	1000	Sgk1	Sgk1	protein_coding
chr9	43094001	43095001		12979	864	ENSRNOG00000016032	+	0	0	1	1	1	5.16e-14	1.54e-12	6.19075	1000	Cnnm3	Cnnm3	protein_coding
chr12	13348001	13349001		16189	-4751	ENSRNOG00000001094	+	0	0	1	0	0	3.13e-13	7.85e-12	6.18887	1000	Zfp316	Zfp316	protein_coding
chr10	71844001	71845001		14514	4294	ENSRNOG00000002812	-	0	1	0	1	1	2.8e-08	2.26e-07	6.18801	1000	Lhx1	Lhx1	protein_coding
chr20	6206001	6207001		22200	12	ENSRNOG00000000517	+	1	0	1	1	1	1.71e-20	2.03e-18	6.1867	1000	Kctd20	Stk38	protein_coding
chr8	22351001	22352001		11536	-14208	ENSRNOG00000043093	-	0	0	0	0	0	2.2e-05	8.52e-05	6.18379	1000	Ap1m2	Ap1m2	protein_coding
chr13	25262001	25263001		17008	0	ENSRNOG00000014859	-	1	0	1	1	1	7.66e-15	2.83e-13	6.17842	1000	Rnf152	Rnf152	protein_coding
chr1	47149001	47150001		265	-12395	ENSRNOG00000018158	+	0	0	0	0	0	1.82e-13	4.8e-12	6.17212	1000	Tmem181	Tmem181	protein_coding
chr1	85386001	85387001		747	0	ENSRNOG00000030266	+	1	0	1	1	0	3.12e-08	2.5e-07	6.16701	1000	Plekhg2	Plekhg2	protein_coding
chr10	103206001	103207001		15139	0	ENSRNOG00000024578	+	1	0	1	1	1	2.11e-08	1.75e-07	6.1658	1000	Ttyh2	Rpl38	protein_coding
chr20	27782001	27783001		22510	0	ENSRNOG00000000824	-	1	0	1	1	0	2.08e-21	2.89e-19	6.16417	1000	Dse	Dse	protein_coding
chr8	77108001	77109001		12084	466	ENSRNOG00000054257	+	0	0	1	0	1	5.57e-26	1.73e-23	6.15694	1000	Adam10	Adam10	protein_coding
chr8	115140001	115141001		12350	0	ENSRNOG00000011189	-	1	0	1	1	0	1.22e-05	5.09e-05	6.1461	1000	Acy1	Acy1	protein_coding
chr15	4399001	4400001		18528	0	ENSRNOG00000006554	-	1	0	1	1	1	1.87e-12	3.96e-11	6.1392	1000	Fam149b1	Fam149b1	protein_coding
chr15	51754001	51755001		18910	-1737	ENSRNOG00000017828	+	0	0	1	0	0	2.91e-18	2.17e-16	6.13515	1000	Egr3	Egr3	protein_coding
chr5	164898001	164899001		8431	0	ENSRNOG00000008619	-	1	0	1	1	1	6.62e-11	9.86e-10	6.1341	1000	Agtrap	Agtrap	protein_coding
chr1	126961001	126962001		1165	0	ENSRNOG00000011932	+	1	0	1	1	1	4.19e-12	8.34e-11	6.13404	1000	Snrpa1	Snrpa1	protein_coding
chr6	1514001	1515001		8726	-1159	ENSRNOG00000040303	+	0	0	1	0	0	5.07e-13	1.2e-11	6.13342	1000	Cebpzos	Cebpz	protein_coding
chr2	88413001	88414001		3062	13	ENSRNOG00000010891	-	1	0	1	1	1	3.81e-12	7.62e-11	6.12871	1000	Lrrcc1	Lrrcc1	protein_coding
chr5	139783001	139784001		7834	0	ENSRNOG00000011171	+	1	0	1	1	1	9.02e-13	2.04e-11	6.12607	1000	Rims3	Rims3	protein_coding
chr12	42108001	42109001		16708	10376	ENSRNOG00000001399	+	0	0	0	1	1	0.00135669	0.00303152	6.12499	1000	Tbx5	Tbx5	protein_coding
chr2	35619001	35620001		2882	-68798	ENSRNOG00000052652	-	0	0	0	0	0	0.000516002	0.00131442	6.1244	1000	LOC100910500	Rgs7bp	protein_coding
chr12	42476001	42477001		16713	15329	ENSRNOG00000008706	-	0	0	0	0	0	3.79e-05	0.000136691	6.12288	1000	Tbx3	Tbx3	protein_coding
chr6	69988001	69989001		9123	16775	ENSRNOG00000047891	+	0	0	0	0	0	1.69e-08	1.42e-07	6.12166	1000	Foxg1	Foxg1	protein_coding
chr10	88442001	88443001		14848	0	ENSRNOG00000016924	-	1	0	1	1	1	5e-15	1.93e-13	6.1214	1000	Acly	Acly	protein_coding
chr7	12014001	12015001		9983	-7286	ENSRNOG00000017916	+	0	1	0	1	1	4.46e-05	0.00015801	6.11501	1000	Rexo1	Rexo1	protein_coding
chr12	2221001	2222001		16032	-6671	ENSRNOG00000001003	+	0	0	0	0	0	3.36e-07	2.12e-06	6.11283	1000	Trappc5	Trappc5	protein_coding
chr5	160352001	160353001		8383	0	ENSRNOG00000012503	-	1	0	1	1	1	1.15e-09	1.29e-08	6.09772	1000	Dnajc16	Dnajc16	protein_coding
chr4	27969001	27970001		5972	-2604	ENSRNOG00000009258	-	0	0	1	0	0	1.09e-09	1.22e-08	6.09453	1000	Cdk6	Cdk6	protein_coding
chr3	7278001	7279001		4162	0	ENSRNOG00000012697	-	1	0	1	1	1	2.34e-07	1.53e-06	6.09378	1000	Spaca9	Spaca9	protein_coding
chr5	160174001	160175001		8375	0	ENSRNOG00000011970	-	1	0	1	1	1	0.000769626	0.00185458	6.08379	1000	Tmem82	Slc25a34	protein_coding
chr13	102755001	102756001		17562	175	ENSRNOG00000037850	-	1	0	1	1	1	2.26e-13	5.85e-12	6.08351	1000	2026-03-02	2026-03-02	protein_coding
chr6	3661001	3662001		8746	3677	ENSRNOG00000007907	+	0	0	0	0	1	1.23e-05	5.1e-05	6.0826	1000	Tmem178a	Tmem178a	protein_coding
chrX	11592001	11593001		22793	-55990	ENSRNOG00000034240	+	0	0	0	0	0	0.000519733	0.00132241	6.08226	1000	Bcor	Bcor	protein_coding
chr16	6077001	6078001		19211	0	ENSRNOG00000015498	-	1	0	1	1	1	0.000751783	0.00181716	6.08003	1000	Il17rb	Il17rb	protein_coding
chr14	5036001	5037001		17738	-2060	ENSRNOG00000047761	-	0	0	1	0	0	3.86e-14	1.2e-12	6.07975	1000	Zfp326	Lrrc8d	protein_coding
chr19	49457001	49458001		21757	0	ENSRNOG00000011296	+	1	0	1	1	1	8.09e-09	7.46e-08	6.07847	1000	Cenpn	Cenpn	protein_coding
chr1	2626001	2627001		17	748	ENSRNOG00000016381	-	0	0	1	1	1	2.15e-06	1.11e-05	6.07809	1000	Ust	Ust	protein_coding
chr4	112774001	112775001		6403	64	ENSRNOG00000007118	+	1	0	1	1	1	4.34e-05	0.000154408	6.07537	1000	Eva1a	Eva1a	protein_coding
chr1	214255001	214256001		1855	-2546	ENSRNOG00000017414	-	0	1	1	1	1	1.22e-07	8.52e-07	6.07504	1000	Irf7	Irf7	protein_coding
chr9	71230001	71231001		13170	0	ENSRNOG00000013412	+	1	0	1	1	1	5.75e-23	1.08e-20	6.07323	1000	Creb1	Creb1	protein_coding
chr8	55683001	55684001		11821	-1072	ENSRNOG00000042165	-	0	0	1	0	0	0.00212062	0.00446828	6.07095	1000	Colca2	Pou2af1	protein_coding
chr14	106859001	106860001		18417	4893	ENSRNOG00000059469	-	0	0	0	0	0	3.43e-08	2.72e-07	6.06814	1000	Otx1	Otx1	protein_coding
chr4	26472001	26473001		5955	1138	ENSRNOG00000016242	+	0	0	0	1	0	2.16e-12	4.49e-11	6.06739	1000	Fzd1	Fzd1	protein_coding
chr19	61332001	61333001		22002	0	ENSRNOG00000010744	+	1	0	1	1	1	0.000470908	0.00121458	6.06727	1000	Nrp1	Nrp1	protein_coding
chr17	86322001	86323001		20595	0	ENSRNOG00000021898	-	0	0	1	1	1	9.2e-05	0.000294681	6.06722	1000	LOC681241	Ptf1a	protein_coding
chr1	134696001	134697001		1207	-2300	ENSRNOG00000012874	+	0	0	1	0	0	7.19e-07	4.2e-06	6.06641	1000	Rgma	Rgma	protein_coding
chr13	89440001	89441001		17412	-6187	ENSRNOG00000046452	-	0	0	0	0	0	4.73e-21	6.09e-19	6.0653	1000	Fcgr2b	Cfap126	protein_coding
chr9	71313001	71314001		13171	0	ENSRNOG00000014212	-	1	0	1	1	1	1.07e-22	1.96e-20	6.06503	1000	Mettl21a	Creb1	protein_coding
chr7	77160001	77161001		10570	-545	ENSRNOG00000006118	-	0	0	1	0	1	3.87e-05	0.000139216	6.06416	1000	Klf10	Klf10	protein_coding
chr5	128449001	128450001		7675	-681	ENSRNOG00000008090	+	0	0	1	0	0	1.9e-08	1.58e-07	6.05912	1000	Txndc12	Txndc12	protein_coding
chr9	66878001	66879001		13143	0	ENSRNOG00000051812	+	0	0	1	1	1	1.59e-09	1.73e-08	6.05885	1000	AC129370.1	Carf	lincRNA
chr6	144156001	144157001		9787	0	ENSRNOG00000032391	+	0	0	1	1	1	2.03e-14	6.85e-13	6.05499	1000	Esyt2	Esyt2	protein_coding
chr10	14092001	14093001		13722	0	ENSRNOG00000014568	-	1	0	1	1	1	0.00179494	0.0038651	6.04828	1000	Ndufb10	Radil	protein_coding
chr1	88098001	88099001		799	0	ENSRNOG00000024036	-	1	0	1	1	1	2.64e-22	4.45e-20	6.04211	1000	Fam98c	Fam98c	protein_coding
chr8	56392001	56393001		11823	234	ENSRNOG00000012123	-	0	0	1	1	1	8e-12	1.5e-10	6.04094	1000	Fdx1	Fdx1	protein_coding
chr4	440001	441001		5782	1334	ENSRNOG00000006846	+	0	0	0	0	1	0.00310383	0.00622341	6.03699	1000	En2	En2	protein_coding
chr9	37231001	37232001		12917	0	ENSRNOG00000011771	-	1	0	1	1	1	1.52e-21	2.16e-19	6.03577	1000	Ptp4a1	Ptp4a1	protein_coding
chr17	43901001	43902001		20331	552	ENSRNOG00000017514	+	0	0	1	1	1	3.44e-06	1.67e-05	6.03471	1000	Btn1a1	Btn1a1	protein_coding
chr7	118044001	118045001		10807	20374	ENSRNOG00000034107	+	0	0	0	0	0	0.00298423	0.00601343	6.03244	1000	LOC681282	Mb	protein_coding
chr15	104404001	104405001		19108	-9680	ENSRNOG00000058057	-	0	0	0	0	0	2.55e-16	1.3e-14	6.032	1000	AABR07019403.1	Hs6st3	processed_transcript
chr2	250600001	250601001		3956	0	ENSRNOG00000012549	-	1	0	1	1	1	8.25e-14	2.35e-12	6.03194	1000	Hs2st1	Hs2st1	protein_coding
chr4	85175001	85176001		6301	-51	ENSRNOG00000010629	-	0	0	1	0	0	1.62e-06	8.68e-06	6.03053	1000	Nod1	Nod1	protein_coding
chr5	21632001	21633001		7096	0	ENSRNOG00000005963	+	0	0	1	1	1	4.25e-12	8.45e-11	6.02629	1000	Rab2a	Rab2a	protein_coding
chr4	9882001	9883001		5895	0	ENSRNOG00000012392	+	1	0	1	1	0	2.09e-08	1.73e-07	6.01972	1000	Dnajc2	Dnajc2	protein_coding
chr7	117304001	117305001		10765	0	ENSRNOG00000029941	+	1	0	1	1	1	9.34e-10	1.07e-08	6.01521	1000	Grina	Grina	protein_coding
chr1	199195001	199196001		1712	-60	ENSRNOG00000018986	+	0	0	1	0	0	6.63e-09	6.27e-08	6.01508	1000	Fbxl19	Fbxl19	protein_coding
chr15	28405001	28406001		18675	47	ENSRNOG00000011544	-	1	0	1	1	1	0.00404325	0.00780771	6.01423	1000	Zfp219	Zfp219	protein_coding
chr7	144554001	144555001		11377	6063	ENSRNOG00000016116	+	0	0	0	0	0	0.00413618	0.00795147	6.00481	1000	Hoxc12	Hoxc12	protein_coding
chr20	8527001	8528001		22292	40737	ENSRNOG00000048426	+	0	0	0	1	1	6.68e-06	2.99e-05	5.99934	1000	AABR07044509.1	Mdga1	protein_coding
chr9	30335001	30336001		12910	12294	ENSRNOG00000049147	+	0	0	0	0	0	1.59e-29	9.2e-27	5.99707	1000	AABR07067099.1	Fam135a	miRNA
chr3	132736001	132737001		5123	-106136	ENSRNOG00000045850	-	0	0	0	0	0	1.23e-05	5.11e-05	5.99688	1000	AABR07053886.1	Ism1	miRNA
chr2	225676001	225677001		3820	30434	ENSRNOG00000012892	+	0	0	0	0	1	0.00286647	0.00580213	5.99508	1000	Abca4	Abca4	protein_coding
chr8	70712001	70713001		12015	0	ENSRNOG00000029127	+	0	0	1	1	1	0.000947613	0.00221698	5.9931	1000	Parp16	Parp16	protein_coding
chr1	141533001	141534001		1251	0	ENSRNOG00000014951	-	1	0	1	1	0	6.74e-09	6.35e-08	5.99206	1000	Mesp1	Mesp1	protein_coding
chr11	64968001	64969001		15695	0	ENSRNOG00000038951	-	1	0	1	1	1	8.54e-07	4.9e-06	5.99123	1000	Cox17	Cox17	protein_coding
chr18	17397001	17398001		20746	-116	ENSRNOG00000054118	-	0	0	1	0	0	1.49e-05	6.07e-05	5.99037	1000	Tpgs2	Tpgs2	protein_coding
chr18	76688001	76689001		21191	25375	ENSRNOG00000055647	-	0	0	0	0	0	0.00498272	0.00932222	5.98951	1000	Rbfa	Rbfa	protein_coding
chr1	177496001	177497001		1551	220	ENSRNOG00000015488	+	0	0	1	0	1	2.6e-07	1.68e-06	5.98802	1000	Tead1	Tead1	protein_coding
chr11	68434001	68435001		15730	-58036	ENSRNOG00000032327	+	0	0	0	0	0	3.26e-19	2.94e-17	5.98478	1000	Pdia5	Sema5b	protein_coding
chr6	26546001	26547001		8895	0	ENSRNOG00000026884	-	0	0	1	1	1	9.59e-09	8.67e-08	5.98461	1000	Snx17	Snx17	protein_coding
chr10	30833001	30834001		13887	0	ENSRNOG00000005406	+	1	0	1	1	0	3.31e-08	2.63e-07	5.98373	1000	Clint1	Clint1	protein_coding
chr6	110903001	110904001		9464	289	ENSRNOG00000011026	-	0	0	1	1	0	9.46e-17	5.3e-15	5.98269	1000	Irf2bpl	Irf2bpl	protein_coding
chr3	175426001	175427001		5704	0	ENSRNOG00000056853	-	1	0	1	1	1	3.64e-15	1.45e-13	5.98237	1000	Psma7	Psma7	protein_coding
chr18	48201001	48202001		20963	0	ENSRNOG00000017488	+	1	0	1	1	0	6.51e-08	4.87e-07	5.98	1000	Snx24	Snx24	protein_coding
chr7	36659001	36660001		10318	142	ENSRNOG00000009094	-	0	0	1	1	1	7.58e-06	3.35e-05	5.97556	1000	Nudt4	Rnd3	protein_coding
chr14	29227001	29228001		17916	4538	ENSRNOG00000057494	-	0	0	0	0	0	5.38e-10	6.55e-09	5.97207	1000	AABR07014739.1	Adgrl3	protein_coding
chr4	77747001	77748001		6234	0	ENSRNOG00000007064	-	1	0	1	1	0	0.00176204	0.00380347	5.97167	1000	Zfp746	Zfp746	protein_coding
chr12	19262001	19263001		16318	0	ENSRNOG00000039234	+	1	0	1	1	0	0.00348232	0.00686263	5.96494	1000	Zscan21	Zscan21	protein_coding
chr14	34528001	34529001		17938	0	ENSRNOG00000002199	-	1	0	1	1	0	5.92e-28	2.47e-25	5.96328	1000	Tmem165	Tmem165	protein_coding
chr10	105787001	105788001		15258	0	ENSRNOG00000000250	-	1	0	1	1	1	3.86e-29	1.87e-26	5.96256	1000	Jmjd6	Jmjd6	protein_coding
chr9	13312001	13313001		12753	-78	ENSRNOG00000011453	-	0	0	1	0	0	4.2e-09	4.14e-08	5.95769	1000	Kif6	Mocs1	protein_coding
chr15	104095001	104096001		19102	0	ENSRNOG00000010085	+	1	0	1	1	1	0.000113661	0.000355196	5.95242	1000	Cldn10	Cldn10	protein_coding
chr1	266257001	266258001		2509	1205	ENSRNOG00000019968	+	0	0	0	1	1	0.000235708	0.000663975	5.95238	1000	Trim8	Trim8	protein_coding
chr18	27575001	27576001		20795	-130	ENSRNOG00000050200	+	0	0	1	0	0	7.13e-06	3.17e-05	5.94911	1000	Kdm3b	LOC100363294	protein_coding
chr8	95388001	95389001		12206	-639	ENSRNOG00000010685	-	0	0	1	0	0	0.00456269	0.00865537	5.94762	1000	Tbx18	Tbx18	protein_coding
chr3	157099001	157100001		5374	0	ENSRNOG00000016744	-	1	0	1	1	1	3.33e-09	3.37e-08	5.9475	1000	Chd6	Chd6	protein_coding
chr12	49505001	49506001		16905	-59993	ENSRNOG00000047673	+	0	0	0	0	1	0.0012457	0.00281847	5.94681	1000	Crybb3	Crybb3	protein_coding
chr10	35637001	35638001		13926	0	ENSRNOG00000003050	+	1	0	1	1	1	2.25e-10	3.03e-09	5.94594	1000	Tbc1d9b	Tbc1d9b	protein_coding
chr9	73687001	73688001		13188	0	ENSRNOG00000038085	+	1	0	1	1	1	4.97e-10	6.11e-09	5.94167	1000	Rpe	Rpe	protein_coding
chr6	41039001	41040001		8999	0	ENSRNOG00000004110	-	1	0	1	1	1	1.22e-06	6.73e-06	5.94049	1000	Trib2	Trib2	protein_coding
chr19	9801001	9802001		21294	0	ENSRNOG00000012482	-	1	0	1	1	1	7.42e-09	6.93e-08	5.93836	1000	Ndrg4	Ndrg4	protein_coding
chr17	24654001	24655001		20207	0	ENSRNOG00000015522	+	1	0	1	1	0	0.00484131	0.00909485	5.93686	1000	Tfap2a	Tfap2a	protein_coding
chr17	5464001	5465001		19926	-104	ENSRNOG00000018417	-	0	0	1	0	0	2.25e-12	4.65e-11	5.93579	1000	Naa35	Naa35	protein_coding
chr19	59698001	59699001		21995	1485	ENSRNOG00000060506	-	0	0	0	0	1	0.00207493	0.00438579	5.93308	1000	AABR07072667.1	Tomm20	lincRNA
chr3	101011001	101012001		4854	103	ENSRNOG00000045698	+	0	0	1	0	1	0.00231961	0.00482958	5.92886	1000	Lin7c	Lin7c	protein_coding
chr10	64202001	64203001		14408	0	ENSRNOG00000006674	-	1	0	1	1	1	8.66e-15	3.14e-13	5.92473	1000	Rflnb	Rflnb	protein_coding
chr15	60056001	60057001		18974	0	ENSRNOG00000009063	-	1	0	1	1	1	3.12e-09	3.19e-08	5.92058	1000	Dnajc15	Dnajc15	protein_coding
chr6	137911001	137912001		9767	-2942	ENSRNOG00000052171	-	0	0	1	0	0	2.28e-07	1.49e-06	5.91913	1000	U4	Mta1	snRNA
chr1	203527001	203528001		1767	152	ENSRNOG00000020643	+	0	0	1	1	1	1.62e-09	1.76e-08	5.91347	1000	Bub3	Bub3	protein_coding
chr4	153681001	153682001		6749	-65948	ENSRNOG00000049982	+	0	0	0	0	0	1.44e-06	7.85e-06	5.90967	1000	Pex26	Mical3	protein_coding
chr13	110752001	110753001		17649	8904	ENSRNOG00000050766	+	0	0	0	0	0	0.00078147	0.00187972	5.90338	1000	Rd3	Slc30a1	protein_coding
chr8	64515001	64516001		11944	-15595	ENSRNOG00000025979	+	0	0	0	0	0	3.09e-05	0.000114806	5.90249	1000	Gramd2a	Pkm	protein_coding
chr7	35472001	35473001		10302	0	ENSRNOG00000007713	+	1	0	1	1	1	6.32e-22	9.81e-20	5.90025	1000	Tmcc3	Tmcc3	protein_coding
chr12	43038001	43039001		16726	-135528	ENSRNOG00000057983	-	0	0	0	0	0	0.00275294	0.00560783	5.89986	1000	AABR07036426.1	Tbx3	lincRNA
chr10	101288001	101289001		15097	0	ENSRNOG00000002607	+	1	0	1	1	0	5.39e-16	2.58e-14	5.89428	1000	Sox9	Sox9	protein_coding
chr7	70465001	70466001		10491	1454	ENSRNOG00000029465	-	0	0	0	1	1	0.000249746	0.000698772	5.89193	1000	Slc26a10	Slc26a10	protein_coding
chr18	76837001	76838001		21198	40982	ENSRNOG00000053640	-	1	0	0	1	1	0.00414364	0.00796352	5.89131	1000	Kcng2	Kcng2	protein_coding
chr1	94154001	94155001		913	-1934	ENSRNOG00000055070	-	0	0	1	0	0	2.96e-08	2.38e-07	5.889	1000	AABR07003030.2	Uri1	lincRNA
chr4	33892001	33893001		5995	1653	ENSRNOG00000007804	+	0	0	0	0	1	2.07e-05	8.07e-05	5.88884	1000	C1galt1	C1galt1	protein_coding
chr12	16988001	16989001		16261	0	ENSRNOG00000022533	+	1	0	1	1	1	8.5e-09	7.82e-08	5.88877	1000	Micall2	Mafk	protein_coding
chr1	256384001	256385001		2343	1211	ENSRNOG00000016750	+	0	0	0	1	1	1.08e-07	7.64e-07	5.88235	1000	Cyp26a1	Cyp26a1	protein_coding
chr12	22210001	22211001		16337	72	ENSRNOG00000001408	-	1	0	1	1	1	8.83e-05	0.000284297	5.8819	1000	Actl6b	Actl6b	protein_coding
chr1	31777001	31778001		178	0	ENSRNOG00000015159	-	1	0	1	1	0	2.3e-06	1.18e-05	5.87942	1000	Slc9a3	Slc9a3	protein_coding
chr18	25221001	25222001		20776	27951	ENSRNOG00000061675	-	0	1	0	1	1	0.00460701	0.00872086	5.87757	1000	AABR07031674.7	Bin1	lincRNA
chr19	49696001	49697001		21763	423	ENSRNOG00000012671	+	0	0	1	0	1	1.12e-11	2.02e-10	5.87697	1000	Gan	Gan	protein_coding
chr6	94979001	94980001		9252	5	ENSRNOG00000004794	-	1	0	1	1	1	6.57e-05	0.000221237	5.86983	1000	Rtn1	Ccdc175	protein_coding
chr6	94979001	94980001		9252	5	ENSRNOG00000004794	-	1	0	1	1	1	6.57e-05	0.000221237	5.86983	1000	Rtn1	Ccdc175	protein_coding
chr13	110256001	110257001		17641	368	ENSRNOG00000004195	-	0	0	1	0	1	1.17e-05	4.92e-05	5.86886	1000	Dtl	Ints7	protein_coding
chr6	50618001	50619001		9065	0	ENSRNOG00000006364	-	1	0	1	1	1	2.25e-15	9.54e-14	5.86777	1000	Dld	Dld	protein_coding
chr12	48257001	48258001		16874	0	ENSRNOG00000028584	+	1	0	1	1	1	1.9e-06	9.95e-06	5.86768	1000	Alkbh2	Alkbh2	protein_coding
chr10	91027001	91028001		14941	0	ENSRNOG00000021713	-	1	0	1	1	1	0.00165281	0.00359854	5.86688	1000	Kif18b	Kif18b	protein_coding
chr17	24242001	24243001		20199	0	ENSRNOG00000018070	+	1	0	1	1	1	2.25e-11	3.72e-10	5.86642	1000	Rnf182	Rnf182	protein_coding
chr12	13997001	13998001		16214	173	ENSRNOG00000001114	-	1	0	1	1	1	0.000431951	0.00112612	5.86629	1000	Wipi2	Wipi2	protein_coding
chr6	95814001	95815001		9258	-1750	ENSRNOG00000006296	+	0	0	1	0	0	0.000365367	0.000973271	5.86475	1000	Six6	Six6	protein_coding
chr5	140495001	140496001		7845	8887	ENSRNOG00000012595	+	0	0	0	0	0	6.96e-05	0.000232507	5.86091	1000	AC124205.1	Ppt1	pseudogene
chr3	61578001	61579001		4612	2599	ENSRNOG00000001589	-	0	0	0	1	1	1.47e-05	5.97e-05	5.86033	1000	Evx2	Hoxd13	protein_coding
chr1	222495001	222496001		2102	0	ENSRNOG00000021179	-	1	0	1	1	1	4.93e-20	5.21e-18	5.86014	1000	Naa40	Naa40	protein_coding
chr1	33276001	33277001		204	-462	ENSRNOG00000012742	-	0	0	1	0	0	3.33e-08	2.65e-07	5.85986	1000	Irx2	Irx2	protein_coding
chr7	12851001	12852001		10087	10064	ENSRNOG00000024879	+	0	1	0	1	0	0.00047107	0.00121458	5.85827	1000	Polrmt	Polrmt	protein_coding
chr8	48471001	48472001		11725	-825	ENSRNOG00000007726	+	0	0	1	0	0	5.67e-09	5.41e-08	5.85552	1000	Mcam	Mcam	protein_coding
chr4	71712001	71713001		6206	64	ENSRNOG00000017149	-	1	0	1	1	1	1.03e-08	9.28e-08	5.85222	1000	Fam131b	Fam131b	protein_coding
chr5	144779001	144780001		7945	0	ENSRNOG00000011751	-	1	0	1	1	1	4.92e-14	1.47e-12	5.85194	1000	Ncdn	LOC100294508	protein_coding
chr3	163215001	163216001		5485	27522	ENSRNOG00000056512	-	0	0	0	0	0	0.00402702	0.00778313	5.85077	1000	AABR07054609.1	Prex1	lincRNA
chr10	103644001	103645001		15155	-24919	ENSRNOG00000036726	-	0	0	0	0	0	1.29e-06	7.08e-06	5.84976	1000	Cd300e	Cd300e	protein_coding
chr4	80202001	80203001		6262	-94118	ENSRNOG00000010011	-	0	0	0	0	0	2.32e-08	1.91e-07	5.84784	1000	Osbpl3	Cycs	protein_coding
chr10	89959001	89960001		14902	0	ENSRNOG00000033653	-	1	0	1	1	1	2.95e-09	3.04e-08	5.8467	1000	Mpp3	Mpp3	protein_coding
chr5	78806001	78807001		7471	0	ENSRNOG00000006719	+	1	0	1	1	1	6.37e-06	2.87e-05	5.83751	1000	Zfp618	Ambp	protein_coding
chr2	225389001	225390001		3816	0	ENSRNOG00000011929	-	1	0	1	1	0	4.01e-27	1.41e-24	5.83701	1000	Abcd3	Abcd3	protein_coding
chr12	47689001	47690001		16850	-8948	ENSRNOG00000001195	+	0	0	0	0	0	1.21e-05	5.04e-05	5.83386	1000	Trpv4	Trpv4	protein_coding
chr8	127782001	127783001		12542	0	ENSRNOG00000032238	-	1	0	1	1	0	2.68e-08	2.18e-07	5.83137	1000	Plcd1	Plcd1	protein_coding
chr3	114894001	114895001		4973	-5344	ENSRNOG00000000172	+	0	0	0	0	0	2.92e-05	0.000109553	5.83109	1000	Sqor	Sqor	protein_coding
chr3	175547001	175548001		5711	-175	ENSRNOG00000055984	+	0	0	1	0	0	0.000557943	0.00140462	5.82753	1000	Adrm1	Adrm1	protein_coding
chr3	67805001	67806001		4682	-17012	ENSRNOG00000007518	-	0	0	0	0	0	5.36e-10	6.54e-09	5.82424	1000	Nckap1	Nckap1	protein_coding
chr3	9636001	9637001		4244	0	ENSRNOG00000018486	-	1	0	1	1	0	1.76e-07	1.18e-06	5.82303	1000	RGD1311084	RGD1311084	protein_coding
chr20	8285001	8286001		22287	0	ENSRNOG00000047171	+	1	0	1	1	1	3.42e-10	4.39e-09	5.82222	1000	Rnf8	Rnf8	protein_coding
chr16	6542001	6543001		19214	0	ENSRNOG00000016015	+	1	0	1	1	1	4.38e-08	3.39e-07	5.81924	1000	Dcp1a	Dcp1a	protein_coding
chr10	106856001	106857001		15288	0	ENSRNOG00000050819	+	1	0	1	1	1	5.87e-10	7.06e-09	5.81808	1000	Birc5	Birc5	protein_coding
chr8	72840001	72841001		12051	497	ENSRNOG00000018184	-	0	0	1	1	1	1.09e-05	4.63e-05	5.81693	1000	Tpm1	Tpm1	protein_coding
chr17	61757001	61758001		20426	-341200	ENSRNOG00000044494	-	0	0	0	0	0	0.000209816	0.000601692	5.81395	1000	5S_rRNA	Fzd8	rRNA
chr3	130113001	130114001		5118	771	ENSRNOG00000007443	-	0	0	1	1	1	4.28e-14	1.31e-12	5.81325	1000	Jag1	Jag1	protein_coding
chr2	128001001	128002001		3229	6	ENSRNOG00000014051	-	1	0	1	1	1	8.42e-14	2.39e-12	5.80853	1000	Pgrmc2	Pgrmc2	protein_coding
chr19	41482001	41483001		21687	0	ENSRNOG00000016977	+	1	0	1	1	1	1.73e-08	1.46e-07	5.8077	1000	Calb2	Calb2	protein_coding
chr19	25306001	25307001		21497	-11583	ENSRNOG00000035644	+	0	0	0	0	0	1.17e-11	2.09e-10	5.80704	1000	Mir23a	Mir23a	miRNA
chr8	122986001	122987001		12503	192	ENSRNOG00000026455	-	0	0	1	1	1	1.62e-08	1.38e-07	5.80697	1000	Gpd1l	Gpd1l	protein_coding
chr2	166683001	166684001		3378	-677	ENSRNOG00000009388	-	0	0	1	0	0	0.000225709	0.000640113	5.80529	1000	Sptssb	Sptssb	protein_coding
chr3	22645001	22646001		4414	4398	ENSRNOG00000010551	+	0	0	0	0	1	0.000466163	0.00120379	5.79957	1000	Lhx2	Lhx2	protein_coding
chr18	19768001	19769001		20755	-148089	ENSRNOG00000053324	-	0	0	0	0	0	0.0027657	0.0056292	5.79525	1000	AABR07031551.1	LOC102547344	lincRNA
chr4	78232001	78233001		6242	-333	ENSRNOG00000008239	+	0	0	1	0	0	4.65e-06	2.18e-05	5.79028	1000	Repin1	Mir504	protein_coding
chr10	106971001	106972001		15293	4041	ENSRNOG00000002946	-	0	0	0	0	0	1.29e-05	5.35e-05	5.78865	1000	Socs3	Socs3	protein_coding
chr1	3763001	3764001		26	0	ENSRNOG00000023549	-	1	0	1	1	0	3.44e-06	1.67e-05	5.78188	1000	Samd5	Samd5	protein_coding
chr1	265888001	265889001		2492	4647	ENSRNOG00000019124	+	1	0	0	1	1	2.18e-12	4.52e-11	5.7813	1000	Elovl3	Elovl3	protein_coding
chr5	147783001	147784001		8015	312	ENSRNOG00000049425	-	0	0	1	1	1	0.00315493	0.00630311	5.78101	1000	Fam167b	Eif3i	protein_coding
chr7	60742001	60743001		10406	0	ENSRNOG00000006304	-	1	0	1	1	1	8.99e-06	3.9e-05	5.77643	1000	Mdm2	Mdm2	protein_coding
chr11	64420001	64421001		15684	249	ENSRNOG00000001525	-	0	0	1	0	1	0.0001642	0.000487329	5.7732	1000	Igsf11	Igsf11	protein_coding
chr6	91518001	91519001		9214	0	ENSRNOG00000004242	-	1	0	1	1	1	3.4e-06	1.65e-05	5.77142	1000	Pole2	Pole2	protein_coding
chr2	24544001	24545001		2771	-1537	ENSRNOG00000010560	+	0	0	1	0	0	4.48e-08	3.46e-07	5.77047	1000	Otp	Otp	protein_coding
chr1	164101001	164102001		1414	0	ENSRNOG00000016206	-	1	0	1	1	1	3.87e-29	1.87e-26	5.76829	1000	Uvrag	Uvrag	protein_coding
chr3	170955001	170956001		5632	0	ENSRNOG00000053384	-	1	0	1	1	0	3.45e-07	2.17e-06	5.76679	1000	Bmp7	Bmp7	protein_coding
chr3	79876001	79877001		4719	0	ENSRNOG00000011414	+	1	0	1	1	0	4.21e-09	4.14e-08	5.76163	1000	Psmc3	Psmc3	protein_coding
chr13	26812001	26813001		17020	0	ENSRNOG00000002781	-	1	0	1	1	1	2.3e-10	3.09e-09	5.76126	1000	Kdsr	Kdsr	protein_coding
chr1	163129001	163130001		1394	0	ENSRNOG00000014251	-	1	0	1	1	1	6.04e-06	2.74e-05	5.76029	1000	Capn5	Capn5	protein_coding
chr3	2625001	2626001		4077	0	ENSRNOG00000013895	+	1	0	1	1	1	1.16e-07	8.15e-07	5.75978	1000	Npdc1	Npdc1	protein_coding
chr1	263356001	263357001		2397	-10267	ENSRNOG00000016656	+	0	0	0	0	0	0.00274923	0.00560167	5.75909	1000	Nkx2-3	Nkx2-3	protein_coding
chr1	225184001	225185001		2140	0	ENSRNOG00000057569	+	1	0	1	1	0	1.96e-06	1.02e-05	5.75856	1000	Ahnak	Ahnak	protein_coding
chr16	74022001	74023001		19748	6	ENSRNOG00000025174	-	1	0	1	1	1	7.72e-08	5.67e-07	5.75644	1000	Kat6a	Kat6a	protein_coding
chr10	91282001	91283001		14959	8775	ENSRNOG00000003266	-	0	0	0	1	1	7.52e-06	3.33e-05	5.75377	1000	LOC100361655	Spata32	protein_coding
chr8	12355001	12356001		11444	0	ENSRNOG00000006792	-	1	0	1	1	0	5.21e-09	5.01e-08	5.75205	1000	Cep57	Fam76b	protein_coding
chr13	89480001	89481001		17420	0	ENSRNOG00000034221	+	1	0	1	1	1	0.000190511	0.000553832	5.74715	1000	Cfap126	Cfap126	protein_coding
chr9	63636001	63637001		13112	678	ENSRNOG00000010188	-	1	0	1	1	1	2.02e-06	1.05e-05	5.74683	1000	Satb2	Satb2	protein_coding
chr2	227456001	227457001		3836	280	ENSRNOG00000014872	+	0	0	1	0	1	7.35e-07	4.27e-06	5.74622	1000	Sec24d	Sec24d	protein_coding
chr6	6558001	6559001		8757	59582	ENSRNOG00000056625	+	0	0	0	0	0	3.87e-11	6.1e-10	5.74064	1000	AABR07062758.1	Eml4	lincRNA
chr1	225185001	225186001		2141	63	ENSRNOG00000057569	+	1	0	1	1	1	7.14e-05	0.000237947	5.73745	1000	Ahnak	Ahnak	protein_coding
chr3	111159001	111160001		4916	-206	ENSRNOG00000014387	+	0	0	1	0	0	5.3e-05	0.000183774	5.73159	1000	Chac1	Chac1	protein_coding
chr1	193459001	193460001		1639	0	ENSRNOG00000024245	-	1	0	1	1	0	9.55e-05	0.000304974	5.72935	1000	Zkscan2	Aqp8	protein_coding
chr5	152763001	152764001		8158	-837	ENSRNOG00000017078	-	0	0	1	0	0	5.27e-09	5.07e-08	5.72909	1000	Selenon	Mtfr1l	protein_coding
chr14	17531001	17532001		17876	0	ENSRNOG00000002506	+	1	0	1	1	1	5.07e-05	0.000176459	5.7286	1000	Cdkl2	Cdkl2	protein_coding
chr2	61950001	61951001		3007	-76	ENSRNOG00000019184	-	0	0	1	0	0	3.37e-06	1.64e-05	5.72676	1000	Npr3	Npr3	protein_coding
chr20	46666001	46667001		22681	0	ENSRNOG00000000303	-	1	0	1	1	1	6.76e-06	3.03e-05	5.72587	1000	Cep57l1	Cep57l1	protein_coding
chr3	170552001	170553001		5619	1688	ENSRNOG00000005246	+	0	0	0	1	1	5.89e-10	7.07e-09	5.72011	1000	Tfap2c	Tfap2c	protein_coding
chr1	264503001	264504001		2440	-592	ENSRNOG00000014253	+	0	0	1	0	0	4.16e-18	3.01e-16	5.71655	1000	Pax2	Pax2	protein_coding
chr12	17146001	17147001		16266	39680	ENSRNOG00000001284	-	0	0	0	0	0	1.29e-05	5.35e-05	5.71433	1000	Uncx	Uncx	protein_coding
chr3	134413001	134414001		5126	0	ENSRNOG00000050784	+	0	0	1	1	1	3.4e-19	3.02e-17	5.71416	1000	AABR07054000.1	Sel1l2	protein_coding
chr9	94250001	94251001		13351	0	ENSRNOG00000019447	-	1	0	1	1	0	0.000131036	0.000402239	5.7124	1000	Ecel1	Ecel1	protein_coding
chr4	150533001	150534001		6710	-10651	ENSRNOG00000006726	-	0	0	0	0	0	4.14e-08	3.24e-07	5.7111	1000	Zfp9	Zfp9	protein_coding
chr10	109852001	109853001		15420	0	ENSRNOG00000036678	+	1	0	1	1	1	3.27e-13	8.11e-12	5.70932	1000	Aspscr1	Notum	protein_coding
chr7	24668001	24669001		10179	0	ENSRNOG00000006987	-	1	0	1	1	1	1.28e-06	7.03e-06	5.70754	1000	Tmem263	Tmem263	protein_coding
chr1	264294001	264295001		2424	0	ENSRNOG00000025781	-	1	0	1	1	1	9.53e-09	8.63e-08	5.70623	1000	Sec31b	Sec31b	protein_coding
chr20	3439001	3440001		22055	0	ENSRNOG00000000827	-	1	1	1	1	1	1.98e-13	5.2e-12	5.70335	1000	Ier3	Ier3	protein_coding
chr10	108165001	108166001		15341	-14491	ENSRNOG00000048113	-	0	0	0	0	0	0.000611094	0.00151837	5.70327	1000	Cbx8	Cbx8	protein_coding
chr4	85662001	85663001		6308	0	ENSRNOG00000012098	+	1	0	1	1	0	3.28e-10	4.22e-09	5.70322	1000	Adcyap1r1	Adcyap1r1	protein_coding
chr12	42095001	42096001		16704	-1627	ENSRNOG00000001399	+	0	0	1	0	0	0.00412811	0.00793825	5.70322	1000	Tbx5	Tbx5	protein_coding
chr13	105140001	105141001		17582	0	ENSRNOG00000002418	-	1	0	1	1	1	2.8e-13	7.09e-12	5.70235	1000	Tgfb2	Tgfb2	protein_coding
chr2	257605001	257606001		4002	-20384	ENSRNOG00000050321	+	0	0	0	0	0	1.16e-12	2.55e-11	5.6995	1000	Zzz3	Zzz3	protein_coding
chr2	25095001	25096001		2781	0	ENSRNOG00000029304	-	0	0	1	1	0	3.91e-11	6.16e-10	5.6993	1000	Aggf1	Zbed3	protein_coding
chrX	63006001	63007001		22920	-2655	ENSRNOG00000048066	-	0	0	1	0	0	0.00116789	0.00266489	5.69925	1000	AABR07038858.1	RGD1564534	processed_pseudogene
chr10	37209001	37210001		13948	0	ENSRNOG00000004563	-	1	0	1	1	1	6.43e-09	6.09e-08	5.69332	1000	Sec24a	Sec24a	protein_coding
chr2	187426001	187427001		3453	0	ENSRNOG00000019201	-	1	0	1	1	1	1.03e-13	2.85e-12	5.69299	1000	Naxe	Naxe	protein_coding
chr2	410001	411001		2664	-78	ENSRNOG00000059722	-	0	0	1	0	0	0.000139751	0.000424497	5.6846	1000	5_8S_rRNA	Erap1	rRNA
chr9	40008001	40009001		12939	0	ENSRNOG00000012284	-	1	0	1	1	1	2.25e-15	9.54e-14	5.684	1000	Khdrbs2	Khdrbs2	protein_coding
chr1	256913001	256914001		2349	261	ENSRNOG00000015235	-	1	0	1	1	1	7.24e-14	2.08e-12	5.68275	1000	Fra10ac1	Fra10ac1	protein_coding
chr7	142695001	142696001		11300	348	ENSRNOG00000032026	-	0	0	1	1	1	0.000264303	0.000733349	5.67664	1000	AABR07058914.1	Acvrl1	pseudogene
chr2	56890001	56891001		2987	2015	ENSRNOG00000012819	+	0	0	0	0	1	3.71e-05	0.000134246	5.67477	1000	Gdnf	Gdnf	protein_coding
chr5	136003001	136004001		7756	-102	ENSRNOG00000018484	-	0	0	1	0	0	4.94e-05	0.000172499	5.6746	1000	Plk3	Plk3	protein_coding
chr6	106971001	106972001		9391	0	ENSRNOG00000008086	-	1	0	1	1	1	2.94e-06	1.45e-05	5.67426	1000	Dpf3	Dpf3	protein_coding
chr1	83977001	83978001		687	0	ENSRNOG00000020947	-	1	0	1	1	1	1.18e-26	3.83e-24	5.67386	1000	Egln2	Egln2	protein_coding
chr19	43338001	43339001		21713	0	ENSRNOG00000059453	+	1	0	1	1	1	2.36e-06	1.2e-05	5.67338	1000	Fcsk	Fcsk	protein_coding
chr7	116781001	116782001		10732	0	ENSRNOG00000007668	-	0	0	1	1	0	2.65e-17	1.67e-15	5.66968	1000	Mafa	Rhpn1	protein_coding
chr19	55594001	55595001		21905	0	ENSRNOG00000015077	+	1	0	1	1	1	5.39e-05	0.000186202	5.66869	1000	Acsf3	Cdh15	protein_coding
chr5	59165001	59166001		7309	0	ENSRNOG00000025453	-	1	0	1	1	0	1.17e-13	3.21e-12	5.66821	1000	Fam221b	Fam221b	protein_coding
chr12	48101001	48102001		16866	0	ENSRNOG00000000691	+	1	0	1	1	1	9.93e-16	4.54e-14	5.66759	1000	Foxn4	Foxn4	protein_coding
chr20	37588001	37589001		22612	315	ENSRNOG00000000801	+	0	0	1	1	1	7.25e-09	6.78e-08	5.66716	1000	Msl3l2	Msl3l2	protein_coding
chr17	12265001	12266001		20078	3900	ENSRNOG00000011668	+	0	0	0	0	1	5.72e-17	3.4e-15	5.66691	1000	Nfil3	Nfil3	protein_coding
chr18	69549001	69550001		21114	0	ENSRNOG00000015777	+	1	0	1	1	0	3.44e-06	1.67e-05	5.66302	1000	Mex3c	Mex3c	protein_coding
chr2	120570001	120571001		3170	0	ENSRNOG00000051480	-	0	0	1	1	1	2.38e-16	1.23e-14	5.66258	1000	Fxr1	Fxr1	protein_coding
chr4	95497001	95498001		6334	-4	ENSRNOG00000006383	+	0	0	1	0	0	1.05e-11	1.9e-10	5.66245	1000	Atoh1	Atoh1	protein_coding
chr2	43070001	43071001		2906	-1325	ENSRNOG00000013002	-	0	0	1	0	0	7.84e-26	2.32e-23	5.66202	1000	Gpbp1	Gpbp1	protein_coding
chr6	134627001	134628001		9668	0	ENSRNOG00000052017	+	0	0	1	1	1	5.57e-06	2.54e-05	5.65979	1000	Dio3	Dio3	pseudogene
chr19	19762001	19763001		21406	-34921	ENSRNOG00000014776	-	0	0	0	0	0	7.52e-06	3.33e-05	5.65978	1000	Adcy7	Adcy7	protein_coding
chr9	10339001	10340001		12687	0	ENSRNOG00000048897	+	0	0	1	1	1	1.9e-12	4.01e-11	5.65619	1000	Vmac	Vmac	protein_coding
chr19	25817001	25818001		21526	1795	ENSRNOG00000002950	+	0	1	0	1	1	0.00351376	0.00691538	5.65456	1000	Lyl1	Lyl1	protein_coding
chr4	67615001	67616001		6191	-4292	ENSRNOG00000026528	-	0	0	1	0	0	4.24e-06	2.01e-05	5.65218	1000	Mrps33	Mrps33	protein_coding
chr18	36717001	36718001		20925	3133	ENSRNOG00000018842	+	0	0	0	0	0	0.000178636	0.000525379	5.65132	1000	Pou4f3	Pou4f3	protein_coding
chr7	14188001	14189001		10115	689	ENSRNOG00000004346	-	0	0	1	0	1	3.32e-07	2.1e-06	5.64994	1000	Notch3	Notch3	protein_coding
chr10	91852001	91853001		14973	21348	ENSRNOG00000003845	+	0	0	0	0	1	0.000226446	0.000641794	5.64988	1000	Wnt3	Wnt3	protein_coding
chr2	188137001	188138001		3476	178	ENSRNOG00000020279	-	1	0	1	1	1	3.67e-05	0.000133177	5.64983	1000	Syt11	Syt11	protein_coding
chr16	74023001	74024001		19749	0	ENSRNOG00000025174	-	1	0	1	1	0	3.09e-07	1.97e-06	5.64977	1000	Kat6a	Kat6a	protein_coding
chr8	70630001	70631001		12012	0	ENSRNOG00000030800	+	0	0	1	1	1	9.6e-09	8.69e-08	5.64974	1000	Igdcc3	Parp16	protein_coding
chr17	53230001	53231001		20384	217	ENSRNOG00000016046	+	1	0	1	1	1	0.00123258	0.00279398	5.64875	1000	Hecw1	Hecw1	protein_coding
chr12	38689001	38690001		16587	1076	ENSRNOG00000056017	-	0	0	0	0	1	0.000262942	0.000730332	5.64682	1000	Bcl7a	Psmd9	protein_coding
chr3	123807001	123808001		5076	0	ENSRNOG00000025286	+	1	0	1	1	0	4.08e-11	6.4e-10	5.6443	1000	Pank2	Pank2	protein_coding
chr4	155709001	155710001		6765	0	ENSRNOG00000009236	+	1	0	1	1	1	9.33e-11	1.36e-09	5.64229	1000	Necap1	Necap1	protein_coding
chr19	10523001	10524001		21318	3509	ENSRNOG00000025843	+	1	0	0	1	1	0.000738325	0.00178982	5.64226	1000	Ccdc102a	Ccdc102a	protein_coding
chr2	128817001	128818001		3237	0	ENSRNOG00000056513	+	0	0	1	1	0	5.75e-16	2.73e-14	5.64217	1000	5_8S_rRNA	RGD1359508	rRNA
chr7	117070001	117071001		10750	0	ENSRNOG00000030264	-	1	0	1	1	1	1.32e-05	5.43e-05	5.64119	1000	Fam83h	Fam83h	protein_coding
chr16	1671001	1672001		19163	-77192	ENSRNOG00000010488	+	0	0	0	0	0	3.1e-11	4.99e-10	5.64006	1000	Zmiz1	Zmiz1	protein_coding
chr8	48692001	48693001		11738	0	ENSRNOG00000010733	-	1	0	1	1	1	0.000170083	0.000502554	5.63665	1000	Vps11	Vps11	protein_coding
chr1	82088001	82089001		651	0	ENSRNOG00000046112	-	1	0	1	1	0	6.74e-05	0.000225871	5.63486	1000	Dedd2	Gsk3a	protein_coding
chr9	53416001	53417001		13070	-23273	ENSRNOG00000038738	+	0	0	0	0	0	2.71e-07	1.75e-06	5.63453	1000	LOC685203	Mstn	protein_coding
chr1	47605001	47606001		273	0	ENSRNOG00000030210	+	1	0	1	1	1	5.88e-11	8.86e-10	5.63318	1000	Fndc1	Fndc1	protein_coding
chr14	47676001	47677001		18041	-300912	ENSRNOG00000061258	-	0	0	0	0	0	1.5e-15	6.58e-14	5.63037	1000	U6	Wdr82	snRNA
chr10	83043001	83044001		14656	-37169	ENSRNOG00000004404	+	0	0	0	0	0	1.18e-05	4.93e-05	5.63019	1000	Tac4	Tac4	protein_coding
chr10	45579001	45580001		14052	0	ENSRNOG00000060229	-	1	0	1	1	0	0.00133306	0.00298674	5.62984	1000	Arf1	Arf1	protein_coding
chr3	161019001	161020001		5431	464	ENSRNOG00000014739	+	0	0	1	1	1	7.56e-06	3.34e-05	5.62609	1000	Wfdc2	Wfdc2	protein_coding
chr7	11824001	11825001		9966	0	ENSRNOG00000032546	-	1	0	1	1	1	1.27e-29	8.15e-27	5.62546	1000	Dot1l	Dot1l	protein_coding
chr2	210089001	210090001		3741	-53	ENSRNOG00000047499	-	0	0	1	0	0	8.58e-09	7.88e-08	5.62524	1000	Rbm15	Slc16a4	protein_coding
chr10	94979001	94980001		15032	0	ENSRNOG00000013728	-	1	0	1	1	0	0.0025048	0.00515801	5.62434	1000	Polg2	Polg2	protein_coding
chr18	28301001	28302001		20807	0	ENSRNOG00000019826	-	1	0	1	1	1	7.01e-06	3.12e-05	5.62275	1000	Sil1	Sil1	protein_coding
chr2	25152001	25153001		2782	335	ENSRNOG00000017890	-	0	0	1	1	1	0.00303367	0.00610014	5.62221	1000	Crhbp	Crhbp	protein_coding
chr7	130498001	130499001		11081	0	ENSRNOG00000052296	+	1	0	1	1	1	1.25e-18	9.79e-17	5.61783	1000	Shank3	Shank3	protein_coding
chr7	140640001	140641001		11220	0	ENSRNOG00000060728	-	1	0	1	1	1	2.77e-08	2.24e-07	5.61671	1000	Tuba1a	Tuba1a	protein_coding
chr10	18125001	18126001		13836	5563	ENSRNOG00000004976	-	0	0	0	0	0	4.9e-05	0.000171587	5.61408	1000	Tlx3	Npm1	protein_coding
chr4	84479001	84480001		6293	163	ENSRNOG00000009564	+	1	0	1	1	1	1.01e-06	5.72e-06	5.61404	1000	Prr15	Prr15	protein_coding
chr20	56196001	56197001		22762	26	ENSRNOG00000050735	-	1	0	1	1	1	2.77e-11	4.5e-10	5.61291	1000	Cd99	Cd99	protein_coding
chr6	108329001	108330001		9420	0	ENSRNOG00000011964	-	1	0	1	1	1	1.51e-05	6.11e-05	5.61183	1000	Abcd4	Abcd4	protein_coding
chr9	93546001	93547001		13343	606	ENSRNOG00000018584	+	0	0	1	0	1	4.57e-10	5.68e-09	5.60923	1000	LOC100359583	Ptma	protein_coding
chr20	42966001	42967001		22630	0	ENSRNOG00000000579	+	1	0	1	1	1	2.71e-06	1.35e-05	5.60874	1000	Marcks	Marcks	protein_coding
chr19	25345001	25346001		21501	0	ENSRNOG00000007582	-	1	0	1	1	1	1.41e-07	9.69e-07	5.60661	1000	Zswim4	Zswim4	protein_coding
chr20	18687001	18688001		22443	-92606	ENSRNOG00000000614	+	0	0	0	0	0	0.000753208	0.00181961	5.60627	1000	Bicc1	Bicc1	protein_coding
chr13	88498001	88499001		17401	-101	ENSRNOG00000002926	-	0	0	1	0	0	7.63e-13	1.75e-11	5.60537	1000	Uap1	Uap1	protein_coding
chr20	46215001	46216001		22666	0	ENSRNOG00000000306	-	1	0	1	1	1	1.09e-15	4.9e-14	5.60233	1000	Smpd2	Smpd2	protein_coding
chr12	50332001	50333001		16924	53	ENSRNOG00000000663	-	1	0	1	1	1	1.42e-05	5.79e-05	5.60147	1000	Tfip11	Tfip11	protein_coding
chr1	220868001	220869001		2013	-187	ENSRNOG00000020617	-	0	0	1	0	0	0.00408757	0.00787391	5.60007	1000	Mus81	Mus81	protein_coding
chr17	49610001	49611001		20370	0	ENSRNOG00000013438	+	1	0	1	1	1	9.61e-05	0.000306317	5.59998	1000	Yae1	Yae1	protein_coding
chr3	47678001	47679001		4502	282	ENSRNOG00000005049	+	0	0	1	1	1	5.06e-05	0.000176291	5.59699	1000	Tbr1	Tbr1	protein_coding
chr15	2984001	2985001		18509	-17426	ENSRNOG00000012850	-	0	0	0	0	0	0.00242427	0.00501928	5.59524	1000	Kat6b	Dupd1	protein_coding
chr9	17254001	17255001		12831	0	ENSRNOG00000019511	-	1	0	1	1	1	2.68e-08	2.18e-07	5.59344	1000	Mrps18a	Mrps18a	protein_coding
chr10	105795001	105796001		15259	0	ENSRNOG00000000248	-	1	0	1	1	1	6.98e-14	2.02e-12	5.58878	1000	Srsf2	Srsf2	protein_coding
chr7	123043001	123044001		10920	0	ENSRNOG00000019383	+	1	0	1	1	1	1.22e-10	1.74e-09	5.58589	1000	Tef	Tef	protein_coding
chr20	50071001	50072001		22739	-100619	ENSRNOG00000051061	+	0	0	0	0	0	0.00523465	0.00971049	5.58549	1000	Prep	Prep	protein_coding
chr14	73738001	73739001		18109	0	ENSRNOG00000050437	+	0	0	1	1	1	0.000391454	0.00103307	5.58333	1000	Bod1l1	Lsg1	protein_coding
chr2	128816001	128817001		3236	-902	ENSRNOG00000056513	+	0	0	1	0	0	5.03e-05	0.000175509	5.58242	1000	5_8S_rRNA	RGD1359508	rRNA
chr3	152273001	152274001		5306	-13846	ENSRNOG00000049814	-	0	0	0	0	0	3.92e-08	3.07e-07	5.5812	1000	LOC100910882	Phf20	protein_coding
chr1	89007001	89008001		811	0	ENSRNOG00000024625	-	1	0	1	1	0	1.18e-06	6.54e-06	5.58101	1000	Proser3	Proser3	protein_coding
chr13	90814001	90815001		17444	0	ENSRNOG00000008301	-	1	0	1	1	1	5.87e-05	0.000200826	5.57504	1000	Tagln2	Tagln2	protein_coding
chr6	8883001	8884001		8786	-2592	ENSRNOG00000057031	+	0	0	1	0	0	3.5e-07	2.2e-06	5.57429	1000	Six3	Six3	protein_coding
chr7	130176001	130177001		11066	0	ENSRNOG00000029866	-	1	0	1	1	1	9.69e-08	6.94e-07	5.57283	1000	Dennd6b	Dennd6b	protein_coding
chr1	29190001	29191001		157	-193	ENSRNOG00000013364	+	0	0	1	0	0	7.58e-06	3.35e-05	5.57152	1000	Hey2	Hey2	protein_coding
chr1	198284001	198285001		1676	0	ENSRNOG00000019920	+	1	0	1	1	1	0.00134792	0.00301547	5.57065	1000	Doc2a	Doc2a	protein_coding
chr1	187882001	187883001		1592	0	ENSRNOG00000047386	-	0	0	1	1	1	3.94e-17	2.42e-15	5.56991	1000	Smg1	Arl6ip1	processed_transcript
chr2	189170001	189171001		3521	125	ENSRNOG00000020797	+	0	0	1	1	1	8.03e-05	0.000262608	5.56926	1000	She	Ube2q1	protein_coding
chr14	3389001	3390001		17711	0	ENSRNOG00000023389	-	1	0	1	1	1	0.000126937	0.000391549	5.56841	1000	Ephx4	Ephx4	protein_coding
chr10	46905001	46906001		14091	-116	ENSRNOG00000028341	+	0	0	1	0	0	1.66e-07	1.12e-06	5.56782	1000	Alkbh5	Alkbh5	protein_coding
chr10	63607001	63608001		14387	21876	ENSRNOG00000022699	-	0	0	0	0	0	8.46e-10	9.83e-09	5.56778	1000	AABR07030039.1	Prpf8	processed_pseudogene
chr10	12014001	12015001		13654	15417	ENSRNOG00000007678	-	0	0	0	0	0	4.32e-07	2.66e-06	5.56649	1000	Zfp263	Zfp263	protein_coding
chr10	64139001	64140001		14404	-30448	ENSRNOG00000061429	-	0	0	0	0	0	2.08e-13	5.43e-12	5.563	1000	Rph3al	Rph3al	protein_coding
chr1	205135001	205136001		1788	-94247	ENSRNOG00000017326	-	0	0	0	0	0	1.85e-14	6.28e-13	5.55952	1000	Ctbp2	Ctbp2	protein_coding
chr5	167952001	167953001		8516	0	ENSRNOG00000058186	+	1	0	1	1	1	4.68e-21	6.09e-19	5.55792	1000	Errfi1	Errfi1	protein_coding
chr4	119959001	119960001		6509	0	ENSRNOG00000012247	-	1	0	1	1	1	8.85e-11	1.3e-09	5.55774	1000	Rab7a	Rab7a	protein_coding
chr2	181905001	181906001		3405	0	ENSRNOG00000025608	-	1	0	1	1	0	2.1e-06	1.09e-05	5.55566	1000	Lrat	Lrat	protein_coding
chr7	12108001	12109001		9992	-4979	ENSRNOG00000061721	-	0	0	1	0	0	0.0014925	0.00329198	5.55251	1000	U6	Tcf3	snRNA
chr3	7635001	7636001		4173	0	ENSRNOG00000039777	+	1	0	1	1	0	1.31e-11	2.32e-10	5.55194	1000	Ttf1	Cfap77	protein_coding
chr16	20881001	20882001		19445	6908	ENSRNOG00000020229	-	0	1	0	1	1	0.00379583	0.007392	5.55134	1000	Homer3	Homer3	protein_coding
chr12	31764001	31765001		16503	-3398	ENSRNOG00000022784	-	0	0	1	0	0	0.000911609	0.00214744	5.55042	1000	Fzd10	Fzd10	pseudogene
chr2	195997001	195998001		3573	481	ENSRNOG00000053599	+	0	0	1	0	1	1.35e-18	1.05e-16	5.54957	1000	Pogz	Psmb4	protein_coding
chr6	7324001	7325001		8767	91312	ENSRNOG00000054672	-	0	0	0	0	0	7.02e-11	1.04e-09	5.54879	1000	AABR07062775.1	Zfp36l2	lincRNA
chr2	209358001	209359001		3734	0	ENSRNOG00000052798	-	1	0	1	1	1	1.96e-05	7.7e-05	5.5463	1000	AABR07072775.1	Lrif1	lincRNA
chrX	33599001	33600001		22863	0	ENSRNOG00000004971	+	1	0	1	1	1	1.57e-06	8.43e-06	5.54525	1000	Txlng	Txlng	protein_coding
chr10	82800001	82801001		14639	0	ENSRNOG00000052113	+	1	0	1	1	0	2.17e-14	7.3e-13	5.54461	1000	Ppp1r9b	Ppp1r9b	protein_coding
chr14	42809001	42810001		17994	45277	ENSRNOG00000041525	+	0	0	0	1	1	2.66e-06	1.33e-05	5.54139	1000	AABR07014983.1	Tmem33	miRNA
chr6	74082001	74083001		9141	-104123	ENSRNOG00000056284	+	0	0	0	0	0	2.28e-11	3.75e-10	5.54099	1000	U6	Akap6	snRNA
chr8	31496001	31497001		11609	-640	ENSRNOG00000014719	+	0	0	1	0	0	2.6e-05	9.88e-05	5.54024	1000	Snx19	Snx19	protein_coding
chr16	82484001	82485001		19836	32528	ENSRNOG00000059470	-	0	0	0	0	0	0.00501798	0.009379	5.53997	1000	7SK	Tubgcp3	misc_RNA
chr18	16544001	16545001		20738	0	ENSRNOG00000015301	+	1	0	1	1	1	3.35e-19	3e-17	5.53561	1000	Elp2	Elp2	protein_coding
chr7	76060001	76061001		10563	616	ENSRNOG00000007000	+	0	0	1	0	1	0.000220262	0.000627197	5.53505	1000	Grhl2	Grhl2	protein_coding
chr5	135285001	135286001		7736	0	ENSRNOG00000058476	-	1	0	1	1	1	4.05e-07	2.51e-06	5.53187	1000	Mast2	Mast2	protein_coding
chr16	71089001	71090001		19717	-46	ENSRNOG00000015501	+	0	0	1	0	0	0.00030986	0.000840519	5.52518	1000	Ddhd2	Ddhd2	protein_coding
chr12	31324001	31325001		16492	-192	ENSRNOG00000000938	-	0	0	1	0	0	1.37e-14	4.83e-13	5.52155	1000	Ran	Ran	protein_coding
chr10	110585001	110586001		15444	0	ENSRNOG00000036661	-	1	0	1	1	1	4.82e-11	7.47e-10	5.5202	1000	Rab40b	Rab40b	protein_coding
chr18	77323001	77324001		21208	-312	ENSRNOG00000017146	-	0	0	1	0	0	0.00071791	0.00174795	5.51569	1000	Nfatc1	Nfatc1	protein_coding
chr9	45672001	45673001		13016	0	ENSRNOG00000013286	+	1	0	1	1	1	4.37e-12	8.66e-11	5.51564	1000	Pdcl3	Pdcl3	protein_coding
chr5	133870001	133871001		7717	4671	ENSRNOG00000025051	+	1	0	0	1	1	9.48e-10	1.09e-08	5.51516	1000	Tal1	Tal1	protein_coding
chr18	3162001	3163001		20664	0	ENSRNOG00000012899	+	1	0	1	1	1	1.98e-15	8.54e-14	5.51389	1000	Rbbp8	Rbbp8	protein_coding
chr1	143647001	143648001		1302	0	ENSRNOG00000019529	-	1	0	1	1	0	5.08e-05	0.000176904	5.51348	1000	Btbd1	Btbd1	protein_coding
chrX	38831001	38832001		22885	-362642	ENSRNOG00000005176	-	0	0	0	0	0	0.00205954	0.00435817	5.5134	1000	Map7d2	Map7d2	protein_coding
chr8	36398001	36399001		11644	0	ENSRNOG00000053126	-	0	0	1	1	1	0.00035755	0.000954009	5.50995	1000	AC111781.1	Srpra	lincRNA
chr3	124144001	124145001		5086	567	ENSRNOG00000021256	-	0	0	1	1	0	7.68e-07	4.45e-06	5.50904	1000	Adra1d	Adra1d	protein_coding
chr17	8883001	8884001		19983	4732	ENSRNOG00000011423	+	0	1	0	1	0	1.93e-08	1.61e-07	5.50877	1000	Pitx1	Pitx1	protein_coding
chr15	19667001	19668001		18603	0	ENSRNOG00000007203	+	1	0	1	1	1	3.05e-12	6.19e-11	5.50579	1000	Psmc6	Psmc6	protein_coding
chr7	139394001	139395001		11170	0	ENSRNOG00000054420	-	1	0	1	1	1	7.38e-10	8.69e-09	5.50546	1000	Vdr	Vdr	protein_coding
chr2	30576001	30577001		2845	0	ENSRNOG00000018297	-	1	0	1	1	1	2.29e-15	9.65e-14	5.49912	1000	Ocln	Ocln	protein_coding
chr20	5466001	5467001		22155	0	ENSRNOG00000000474	-	1	0	1	1	1	1.09e-07	7.68e-07	5.49551	1000	Rgl2	Rgl2	protein_coding
chr12	39420001	39421001		16616	-2597	ENSRNOG00000001294	+	0	0	1	0	0	7.82e-15	2.88e-13	5.49361	1000	Ift81	Ift81	protein_coding
chr16	26906001	26907001		19511	0	ENSRNOG00000043387	+	1	0	1	1	0	5.95e-16	2.81e-14	5.49084	1000	Cpe	Cpe	protein_coding
chr5	33574001	33575001		7160	0	ENSRNOG00000006298	-	1	0	1	1	1	1.15e-08	1.02e-07	5.48758	1000	Cpne3	Rmdn1	protein_coding
chr3	150114001	150115001		5272	-5104	ENSRNOG00000016975	-	0	0	0	0	0	4.21e-05	0.000150353	5.48708	1000	Pxmp4	Pxmp4	protein_coding
chr6	78172001	78173001		9174	0	ENSRNOG00000009151	+	1	0	1	1	1	4.86e-10	6e-09	5.48477	1000	Mipol1	LOC314140	protein_coding
chr10	81912001	81913001		14617	-690	ENSRNOG00000002828	+	0	0	1	0	0	0.00059638	0.00148624	5.48359	1000	Tob1	Tob1	protein_coding
chr1	222494001	222495001		2101	383	ENSRNOG00000021179	-	0	0	1	0	1	0.000275035	0.00075902	5.48305	1000	Naa40	Naa40	protein_coding
chr2	161560001	161561001		3348	416	ENSRNOG00000059464	+	0	0	1	0	0	8.5e-05	0.000275105	5.48227	1000	5_8S_rRNA	Shox2	rRNA
chr1	1970001	1971001		14	31583	ENSRNOG00000016041	+	0	1	0	1	1	2.72e-05	0.000102708	5.48008	1000	Zc3h12d	Zc3h12d	protein_coding
chr12	19231001	19232001		16317	0	ENSRNOG00000001335	+	1	0	1	1	1	4.66e-10	5.78e-09	5.47975	1000	Zkscan1	Zkscan1	protein_coding
chr7	12234001	12235001		10008	0	ENSRNOG00000048204	-	0	1	1	1	1	3.24e-10	4.19e-09	5.47635	1000	AC120291.3	Adamtsl5	protein_coding
chr12	15443001	15444001		16226	-95621	ENSRNOG00000024342	-	0	0	0	0	0	1.72e-24	4.24e-22	5.47628	1000	AABR07035461.1	Gna12	processed_pseudogene
chr5	153755001	153756001		8192	-17841	ENSRNOG00000048139	-	0	0	0	0	0	5.8e-12	1.11e-10	5.47458	1000	Ncmap	Ncmap	protein_coding
chr3	56125001	56126001		4535	0	ENSRNOG00000008616	+	0	0	1	1	0	6.54e-17	3.83e-15	5.47384	1000	Ubr3	Mettl5	protein_coding
chr5	25142001	25143001		7134	-3950	ENSRNOG00000039949	+	0	0	1	0	0	1.09e-16	6.02e-15	5.47252	1000	Rad54b	Rad54b	protein_coding
chr19	56025001	56026001		21915	99	ENSRNOG00000016088	+	0	0	1	0	1	3.22e-08	2.57e-07	5.47205	1000	Cdk10	Cdk10	protein_coding
chr9	117736001	117737001		13530	-612	ENSRNOG00000016719	+	0	0	1	0	0	2.25e-13	5.84e-12	5.47083	1000	Zfp161	Zfp161	protein_coding
chr3	161462001	161463001		5450	28592	ENSRNOG00000018111	+	0	0	0	1	1	0.00416232	0.00799366	5.47076	1000	Slc12a5	Slc12a5	protein_coding
chr6	97215001	97216001		9289	-8295	ENSRNOG00000055780	-	0	0	0	0	0	0.000290125	0.000794256	5.46727	1000	AABR07064829.1	Snapc1	lincRNA
chr2	260177001	260178001		4022	-28413	ENSRNOG00000009845	-	0	0	0	0	0	1.67e-09	1.8e-08	5.4667	1000	Acadm	Acadm	protein_coding
chr14	2392001	2393001		17692	-20119	ENSRNOG00000000065	-	0	0	0	0	0	3.25e-13	8.08e-12	5.46421	1000	Pde6b	Pde6b	protein_coding
chr8	50199001	50200001		11775	0	ENSRNOG00000017151	-	1	0	1	1	1	3.44e-21	4.63e-19	5.46398	1000	Rnf214	Pcsk7	protein_coding
chrX	143291001	143292001		23079	-16822	ENSRNOG00000003435	-	0	0	0	0	0	0.000557354	0.00140367	5.45785	1000	Mcf2	F9	protein_coding
chr10	38918001	38919001		13975	0	ENSRNOG00000007515	+	1	0	1	1	1	5.54e-07	3.32e-06	5.45716	1000	Kif3a	Kif3a	protein_coding
chr10	13591001	13592001		13697	0	ENSRNOG00000007436	-	1	0	1	1	1	3.59e-05	0.000130817	5.45668	1000	Tedc2	Tedc2	protein_coding
chr1	72732001	72733001		446	0	ENSRNOG00000017795	+	1	0	1	1	1	3.47e-06	1.68e-05	5.45455	1000	Hspbp1	Hspbp1	protein_coding
chr10	85573001	85574001		14752	890	ENSRNOG00000048187	-	0	0	1	1	0	3.73e-10	4.74e-09	5.44932	1000	Epop	Epop	protein_coding
chr5	165441001	165442001		8450	49	ENSRNOG00000012455	-	1	0	1	1	1	4.94e-06	2.29e-05	5.44774	1000	Tardbp	Tardbp	protein_coding
chr1	198120001	198121001		1667	0	ENSRNOG00000019369	-	1	1	1	1	1	3.47e-09	3.48e-08	5.44718	1000	Slx1b	Slx1b	protein_coding
chr8	67492001	67493001		11968	0	ENSRNOG00000015257	-	1	0	1	1	0	7.67e-09	7.12e-08	5.44644	1000	Coro2b	Itga11	protein_coding
chr5	160086001	160087001		8371	-8428	ENSRNOG00000060917	+	0	0	0	0	0	6.86e-15	2.57e-13	5.44164	1000	AABR07050298.1	Spen	protein_coding
chr10	108163001	108164001		15340	-12491	ENSRNOG00000048113	-	0	0	0	0	0	2.59e-11	4.22e-10	5.44093	1000	Cbx8	Cbx8	protein_coding
chr20	28356001	28357001		22516	-717	ENSRNOG00000056298	-	0	0	1	0	0	0.00152831	0.00335763	5.43914	1000	AABR07044959.1	Edar	pseudogene
chr2	62590001	62591001		3016	-33596	ENSRNOG00000036432	-	0	0	0	0	1	0.00018544	0.000541808	5.43855	1000	AABR07008505.1	Pdzd2	miRNA
chr5	147068001	147069001		7985	-617	ENSRNOG00000049496	+	0	0	1	0	0	7.29e-09	6.82e-08	5.43586	1000	Trim62	Azin2	protein_coding
chr7	117291001	117292001		10764	-1041	ENSRNOG00000023781	-	0	0	1	1	0	2.41e-11	3.97e-10	5.43393	1000	Plec	Plec	protein_coding
chr15	41329001	41330001		18817	8285	ENSRNOG00000014265	-	0	0	0	0	1	2.93e-07	1.88e-06	5.43375	1000	Tnfrsf19	Tnfrsf19	protein_coding
chr9	10293001	10294001		12682	0	ENSRNOG00000050381	-	1	0	1	1	1	7.65e-12	1.43e-10	5.43348	1000	Dus3l	Dus3l	protein_coding
chr1	80383001	80384001		567	0	ENSRNOG00000017448	+	1	0	1	1	1	0.00174992	0.0037822	5.42885	1000	Exoc3l2	Mark4	protein_coding
chr15	88620001	88621001		19037	1414	ENSRNOG00000010479	-	0	0	0	1	0	6.4e-06	2.88e-05	5.42806	1000	Mycbp2	Rnf219	protein_coding
chr2	201292001	201293001		3662	2645	ENSRNOG00000019565	+	0	0	0	0	1	0.000213964	0.000611843	5.42638	1000	Tbx15	Tbx15	protein_coding
chr15	108924001	108925001		19148	0	ENSRNOG00000052414	+	0	0	1	1	1	5.35e-05	0.000185101	5.42608	1000	AC123185.2	Zic2	pseudogene
chr1	141446001	141447001		1248	-23	ENSRNOG00000026857	+	0	0	1	1	1	0.000225421	0.000639567	5.42606	1000	Kif7	Plin1	protein_coding
chr6	6427001	6428001		8755	0	ENSRNOG00000004205	+	1	0	1	1	1	4.85e-12	9.5e-11	5.4259	1000	Pkdcc	Pkdcc	protein_coding
chr7	11003001	11004001		9879	0	ENSRNOG00000005874	-	1	0	1	1	1	1.8e-07	1.21e-06	5.42498	1000	Tle2	Tle2	protein_coding
chr8	128026001	128027001		12547	0	ENSRNOG00000013634	-	1	0	1	1	1	0.000214924	0.000614358	5.42484	1000	Myd88	Myd88	protein_coding
chr14	20952001	20953001		17893	96	ENSRNOG00000003296	-	1	0	1	1	1	3.46e-06	1.67e-05	5.42209	1000	Dck	Dck	protein_coding
chr20	4774001	4775001		22115	16868	ENSRNOG00000050183	-	0	0	0	1	1	1.35e-23	2.76e-21	5.42108	1000	RT1-CE1	RT1-CE2	protein_coding
chr1	132878001	132879001		1203	-12573	ENSRNOG00000051108	+	0	0	0	0	0	8.85e-06	3.85e-05	5.42011	1000	AABR07004244.1	Mctp2	processed_pseudogene
chr20	13941001	13942001		22402	125	ENSRNOG00000001237	+	1	0	1	1	1	2.95e-07	1.89e-06	5.4164	1000	Cabin1	Susd2	protein_coding
chr18	31109001	31110001		20887	0	ENSRNOG00000039415	-	1	0	1	1	0	9.97e-08	7.13e-07	5.41603	1000	Fchsd1	Fchsd1	protein_coding
chr9	94083001	94084001		13350	-94222	ENSRNOG00000042889	+	0	0	0	0	1	0.000933144	0.00218851	5.41564	1000	Alpg	Alpi	protein_coding
chr8	13725001	13726001		11460	-36764	ENSRNOG00000052585	+	0	0	0	0	0	9.33e-12	1.72e-10	5.41447	1000	7SK	Hephl1	misc_RNA
chr10	61746001	61747001		14342	0	ENSRNOG00000002980	+	1	0	1	1	1	4.37e-08	3.39e-07	5.41079	1000	Tsr1	Sgsm2	protein_coding
chr16	10715001	10716001		19274	-8929	ENSRNOG00000055025	-	0	0	0	0	0	0.000810822	0.00193948	5.41061	1000	Fam25a	Fam25a	protein_coding
chr2	244403001	244404001		3941	-32019	ENSRNOG00000015987	-	0	0	0	0	0	2.73e-07	1.76e-06	5.40947	1000	Rap1gds1	Rap1gds1	protein_coding
chr7	2940001	2941001		9853	123	ENSRNOG00000060753	-	0	0	1	1	1	2.49e-07	1.61e-06	5.40683	1000	Esyt1	Esyt1	protein_coding
chr10	43680001	43681001		14026	30350	ENSRNOG00000060046	+	0	0	0	0	0	0.00124	0.00280843	5.40607	1000	AABR07029664.1	Igtp	snoRNA
chr16	20588001	20589001		19407	3450	ENSRNOG00000019741	-	0	0	0	1	1	3.33e-08	2.65e-07	5.40555	1000	Isyna1	Isyna1	protein_coding
chr16	20335001	20336001		19379	-639	ENSRNOG00000029264	+	0	0	1	0	0	0.00013165	0.000403659	5.40376	1000	Kcnn1	Kcnn1	protein_coding
chr16	20325001	20326001		19375	7556	ENSRNOG00000018932	+	0	0	0	0	0	1.04e-15	4.72e-14	5.40194	1000	Ccdc124	Ccdc124	protein_coding
chr20	14096001	14097001		22407	88	ENSRNOG00000049952	+	1	0	1	1	0	3.09e-10	4.03e-09	5.40162	1000	Gucd1	Gucd1	protein_coding
chr2	47281001	47282001		2937	0	ENSRNOG00000053550	-	1	0	1	1	0	1.23e-06	6.8e-06	5.39581	1000	Itga1	Itga1	protein_coding
chr14	13277001	13278001		17842	84655	ENSRNOG00000000081	+	0	0	0	0	0	4.48e-05	0.000158631	5.39556	1000	Antxr2	Fgf5	protein_coding
chr10	108131001	108132001		15329	-106	ENSRNOG00000049215	+	0	0	1	0	0	0.000121093	0.000375781	5.3946	1000	Cbx2	Cbx2	protein_coding
chrX	19243001	19244001		22832	0	ENSRNOG00000003178	+	1	0	1	1	0	2.3e-06	1.18e-05	5.39339	1000	Mageh1	Mageh1	protein_coding
chr7	144120001	144121001		11365	-745	ENSRNOG00000042355	+	0	0	1	0	0	1.47e-07	1.01e-06	5.39262	1000	Tarbp2	Map3k12	protein_coding
chr12	11293001	11294001		16142	59	ENSRNOG00000000996	-	1	0	1	1	1	1.08e-05	4.56e-05	5.39177	1000	Arpc1a	Arpc1a	protein_coding
chr17	8520001	8521001		19974	0	ENSRNOG00000012168	-	1	0	1	1	1	2.01e-06	1.05e-05	5.39052	1000	Fbxl21	Fbxl21	protein_coding
chr4	122740001	122741001		6554	111	ENSRNOG00000005390	-	0	0	1	1	1	2.57e-05	9.76e-05	5.38976	1000	Nup210	Nup210	protein_coding
chr18	30781001	30782001		20863	0	ENSRNOG00000020024	-	1	0	1	1	1	2.82e-24	6.6e-22	5.38937	1000	Taf7	Taf7	protein_coding
chr3	121488001	121489001		5032	0	ENSRNOG00000017647	-	1	0	1	1	1	5.15e-12	1e-10	5.38438	1000	Zc3h8	Zc3h8	protein_coding
chr9	17880001	17881001		12855	0	ENSRNOG00000025808	-	1	0	1	1	1	1.77e-06	9.36e-06	5.38223	1000	Aars2	Aars2	protein_coding
chr1	144239001	144240001		1311	0	ENSRNOG00000010840	+	1	0	1	1	1	1.06e-09	1.2e-08	5.38071	1000	Adamtsl3	Adamtsl3	protein_coding
chr17	15897001	15898001		20119	-15675	ENSRNOG00000016587	-	0	0	0	0	0	0.000722207	0.00175681	5.37427	1000	Ninj1	Ninj1	protein_coding
chr5	135676001	135677001		7744	433	ENSRNOG00000018143	-	0	1	1	1	0	0.00175785	0.00379652	5.37322	1000	Hpdl	Hpdl	protein_coding
chr4	10630001	10631001		5907	-74	ENSRNOG00000013135	+	0	0	1	0	0	8.81e-10	1.02e-08	5.37194	1000	Ptpn12	Ptpn12	protein_coding
chr2	52998001	52999001		2963	-110685	ENSRNOG00000053086	+	0	0	0	0	0	2.22e-05	8.57e-05	5.37029	1000	Selenop	Selenop	protein_coding
chrX	123474001	123475001		23041	0	ENSRNOG00000012564	-	1	0	1	1	1	5.4e-06	2.47e-05	5.36936	1000	RGD1564541	RGD1564541	protein_coding
chr20	22060001	22061001		22477	0	ENSRNOG00000000638	+	1	0	1	1	1	1.75e-09	1.88e-08	5.36711	1000	Zfp365	Zfp365	protein_coding
chr1	215011001	215012001		1864	-5861	ENSRNOG00000061253	-	0	0	0	0	0	2.06e-06	1.07e-05	5.36659	1000	AABR07006038.1	Mob2	lincRNA
chr1	94473001	94474001		917	-18820	ENSRNOG00000055333	-	0	0	0	0	0	0.000325908	0.000878158	5.36559	1000	AABR07003040.1	Ccne1	lincRNA
chr5	151209001	151210001		8090	-1343	ENSRNOG00000042855	+	0	0	1	0	0	9.38e-10	1.08e-08	5.36529	1000	Ahdc1	Ahdc1	protein_coding
chr6	66622001	66623001		9113	386765	ENSRNOG00000057513	+	0	0	0	0	0	0.000109634	0.000344146	5.36441	1000	SNORA73	Nova1	snoRNA
chr1	264584001	264585001		2445	-64115	ENSRNOG00000048135	+	0	0	0	0	0	9.32e-06	4.02e-05	5.3635	1000	5S_rRNA	Pax2	rRNA
chr7	63577001	63578001		10434	491	ENSRNOG00000005388	-	0	0	1	0	1	9.11e-09	8.29e-08	5.3621	1000	Rassf3	Rassf3	protein_coding
chr8	111107001	111108001		12311	0	ENSRNOG00000008459	-	1	0	1	1	1	2.36e-27	8.52e-25	5.36149	1000	Anapc13	Cep63	protein_coding
chr12	2579001	2580001		16042	0	ENSRNOG00000028892	+	0	0	1	1	0	0.00142572	0.00316036	5.35909	1000	Prr36	Lrrc8e	protein_coding
chr15	51884001	51885001		18920	5833	ENSRNOG00000008829	-	0	0	0	0	1	6.19e-07	3.67e-06	5.3565	1000	Sorbs3	Sorbs3	protein_coding
chr1	219374001	219375001		1957	0	ENSRNOG00000022289	-	1	0	1	1	1	1.16e-10	1.65e-09	5.35535	1000	Aip	Tmem134	protein_coding
chr9	49479001	49480001		13043	0	ENSRNOG00000038909	+	1	0	1	1	1	7.02e-09	6.59e-08	5.35495	1000	Pou3f3	Pou3f3	protein_coding
chr1	15374001	15375001		100	0	ENSRNOG00000012322	-	1	0	1	1	1	2.77e-20	3.21e-18	5.35041	1000	Pex7	Pex7	protein_coding
chr1	61398001	61399001		345	0	ENSRNOG00000060256	-	0	0	1	1	1	0.000202329	0.000583357	5.35	1000	RNaseP_nuc	Zfp52	ribozyme
chr2	210364001	210365001		3745	-16830	ENSRNOG00000018290	+	0	0	0	0	0	4.11e-11	6.45e-10	5.34646	1000	Alx3	Alx3	protein_coding
chr16	69195001	69196001		19699	0	ENSRNOG00000013763	-	1	0	1	1	0	2.93e-08	2.36e-07	5.34189	1000	Erlin2	Erlin2	protein_coding
chr5	153708001	153709001		8191	0	ENSRNOG00000018194	-	1	0	1	1	1	5.97e-07	3.56e-06	5.34131	1000	Srrm1	Srrm1	protein_coding
chr10	56410001	56411001		14232	-29	ENSRNOG00000015057	+	0	0	1	1	0	0.00151743	0.00333758	5.33944	1000	Tmem102	Fgf11	protein_coding
chr2	258967001	258968001		4008	29139	ENSRNOG00000032660	-	0	0	0	0	1	6.59e-08	4.92e-07	5.33868	1000	Adgrl2	Adgrl2	protein_coding
chr19	25961001	25962001		21538	0	ENSRNOG00000003029	-	1	0	1	1	1	0.000141867	0.000429958	5.33696	1000	Calr	Calr	protein_coding
chr3	8958001	8959001		4214	0	ENSRNOG00000017663	+	1	0	1	1	1	9.86e-20	1e-17	5.33645	1000	Dolpp1	Dolpp1	protein_coding
chr7	122925001	122926001		10913	337	ENSRNOG00000024631	-	0	0	1	1	1	0.00259224	0.00531753	5.33365	1000	Chadl	L3mbtl2	protein_coding
chr7	126691001	126692001		11019	0	ENSRNOG00000032846	-	1	0	1	1	1	0.000381808	0.00101101	5.328	1000	Cdpf1	Cdpf1	protein_coding
chrX	72132001	72133001		22949	0	ENSRNOG00000003189	-	1	0	1	1	1	4.26e-08	3.32e-07	5.32583	1000	Cited1	Cited1	protein_coding
chr14	104475001	104476001		18394	0	ENSRNOG00000004992	+	1	0	1	1	1	3.56e-07	2.23e-06	5.32565	1000	Rab1a	Rab1a	protein_coding
chr10	47052001	47053001		14098	6217	ENSRNOG00000005275	-	0	0	0	1	1	7.11e-07	4.15e-06	5.32336	1000	Shmt1	Shmt1	protein_coding
chr8	116310001	116311001		12380	-79	ENSRNOG00000021548	+	0	0	1	1	1	2.34e-05	8.98e-05	5.32213	1000	Rassf1	Rassf1	protein_coding
chr10	48209001	48210001		14118	75	ENSRNOG00000002899	-	1	0	1	1	1	1.64e-11	2.82e-10	5.32192	1000	Akap10	Akap10	protein_coding
chr19	39088001	39089001		21666	12	ENSRNOG00000020333	+	1	0	1	1	1	2.5e-12	5.12e-11	5.31887	1000	Utp4	Utp4	protein_coding
chr14	106394001	106395001		18415	43	ENSRNOG00000054331	+	1	0	1	1	1	3.39e-09	3.42e-08	5.3184	1000	Wdpcp	Wdpcp	protein_coding
chr1	266358001	266359001		2510	0	ENSRNOG00000020020	+	1	0	1	1	1	0.000126571	0.0003906	5.3173	1000	Wbp1l	Wbp1l	protein_coding
chr5	35825001	35826001		7170	5713	ENSRNOG00000007683	-	0	0	0	1	1	3.44e-12	6.93e-11	5.3139	1000	Prdm13	Ccnc	protein_coding
chr6	128750001	128751001		9578	0	ENSRNOG00000004206	+	1	0	1	1	0	7.8e-10	9.12e-09	5.31345	1000	Glrx5	Glrx5	protein_coding
chr9	118277001	118278001		13538	-54518	ENSRNOG00000026817	+	0	0	0	0	0	2.56e-10	3.4e-09	5.30903	1000	Tas2r143	Tas2r143	protein_coding
chr12	39253001	39254001		16609	0	ENSRNOG00000001309	+	1	0	1	1	1	9.79e-05	0.000311377	5.30511	1000	Camkk2	Camkk2	protein_coding
chr14	112946001	112947001		18459	0	ENSRNOG00000003374	-	1	0	1	1	0	4.28e-09	4.21e-08	5.30504	1000	Ccdc85a	Ccdc85a	protein_coding
chrX	4946001	4947001		22779	-58	ENSRNOG00000052721	-	0	0	1	0	0	3.54e-06	1.71e-05	5.30094	1000	Kdm6a	Dusp21	protein_coding
chr4	121564001	121565001		6538	213	ENSRNOG00000060248	-	0	0	1	0	1	1.75e-11	2.98e-10	5.29551	1000	Chchd6	Chchd6	protein_coding
chr14	114483001	114484001		18471	128	ENSRNOG00000037462	-	1	0	1	1	1	0.000753977	0.00182114	5.29412	1000	Eml6	Sptbn1	protein_coding
chr9	27005001	27006001		12891	25222	ENSRNOG00000057549	-	0	0	0	0	0	1.28e-09	1.42e-08	5.29353	1000	AABR07067032.1	Paqr8	snoRNA
chr9	82046001	82047001		13230	-6582	ENSRNOG00000052510	+	0	1	0	1	0	4.04e-05	0.000144727	5.29319	1000	Wnt10a	Wnt10a	protein_coding
chr7	144993001	144994001		11412	0	ENSRNOG00000057451	-	1	0	1	1	1	1.15e-06	6.42e-06	5.29212	1000	Itga5	Itga5	protein_coding
chr19	37221001	37222001		21606	0	ENSRNOG00000015242	+	1	0	1	1	1	0.00305265	0.00613369	5.29205	1000	Fbxl8	Fbxl8	protein_coding
chr10	17542001	17543001		13828	0	ENSRNOG00000004395	+	1	0	1	1	1	0.000500799	0.00127911	5.29079	1000	Fbxw11	Fbxw11	protein_coding
chr5	141572001	141573001		7873	0	ENSRNOG00000017426	+	1	0	1	1	1	6.98e-15	2.6e-13	5.28717	1000	Rragc	Rragc	protein_coding
chrX	40258001	40259001		22888	0	ENSRNOG00000007644	+	1	0	1	1	0	0.000710856	0.00173204	5.28703	1000	Mbtps2	Mbtps2	protein_coding
chr10	97941001	97942001		15079	297	ENSRNOG00000049876	+	0	0	1	0	1	6.35e-15	2.4e-13	5.28639	1000	Prkar1a	Prkar1a	protein_coding
chr6	104018001	104019001		9363	395	ENSRNOG00000027707	+	1	0	1	1	1	0.000952039	0.00222578	5.2853	1000	Exd2	Exd2	protein_coding
chr17	24651001	24652001		20204	-2903	ENSRNOG00000015522	+	0	0	1	0	0	2.58e-07	1.67e-06	5.28461	1000	Tfap2a	Vps37d	protein_coding
chr1	261670001	261671001		2384	-416	ENSRNOG00000015220	-	0	0	1	0	0	2.38e-10	3.19e-09	5.28339	1000	Crtac1	Crtac1	protein_coding
chr10	45578001	45579001		14051	30	ENSRNOG00000060229	-	1	0	1	1	1	1.06e-08	9.51e-08	5.28227	1000	Arf1	Arf1	protein_coding
chr20	46168001	46169001		22665	0	ENSRNOG00000000308	+	1	0	1	1	1	1.73e-13	4.62e-12	5.28218	1000	Zbtb24	Zbtb24	protein_coding
chr2	211527001	211528001		3769	0	ENSRNOG00000012149	-	1	0	1	1	1	9.59e-11	1.39e-09	5.28175	1000	Gpsm2	Gpsm2	protein_coding
chrX	15651001	15652001		22820	0	ENSRNOG00000022939	-	1	0	1	1	1	0.000112101	0.000350979	5.2815	1000	Gpkow	Gpkow	protein_coding
chr7	12761001	12762001		10071	342	ENSRNOG00000009760	-	1	0	1	1	1	6.54e-12	1.24e-10	5.27855	1000	Palm	Abca7	protein_coding
chr10	91755001	91756001		14968	82	ENSRNOG00000003506	-	0	0	1	0	1	0.00517879	0.0096283	5.27652	1000	Gosr2	Gosr2	protein_coding
chr11	32619001	32620001		15561	-35617	ENSRNOG00000026870	+	0	0	0	0	0	2.46e-08	2.02e-07	5.27079	1000	Clic6	Clic6	protein_coding
chr6	48866001	48867001		9058	0	ENSRNOG00000060614	+	1	0	1	1	1	0.000641527	0.00158288	5.26915	1000	Pxdn	Pxdn	protein_coding
chr17	36772001	36773001		20295	363	ENSRNOG00000011335	+	0	0	1	0	1	6.55e-07	3.86e-06	5.26327	1000	Gpr50	Gpr50	protein_coding
chr3	164822001	164823001		5525	0	ENSRNOG00000010883	+	1	0	1	1	1	1.78e-11	3.02e-10	5.25966	1000	Pard6b	Pard6b	protein_coding
chr5	170040001	170041001		8602	141700	ENSRNOG00000057128	+	0	0	0	0	0	9.57e-12	1.76e-10	5.25669	1000	AABR07050561.1	Nphp4	protein_coding
chr3	121596001	121597001		5036	0	ENSRNOG00000018205	+	1	0	1	1	0	1.7e-06	9.05e-06	5.2528	1000	Ttl	Ttl	protein_coding
chr12	46862001	46863001		16803	0	ENSRNOG00000051966	-	0	0	1	1	0	1.18e-05	4.94e-05	5.25189	1000	U4	Sirt4	snRNA
chr5	64282001	64283001		7400	0	ENSRNOG00000008159	+	1	0	1	1	1	1.39e-06	7.6e-06	5.25141	1000	Msantd3	Msantd3	protein_coding
chr15	26687001	26688001		18654	-8582	ENSRNOG00000031849	-	0	0	0	0	0	3.74e-05	0.000135139	5.25084	1000	Armh4	Armh4	protein_coding
chr20	4824001	4825001		22117	0	ENSRNOG00000000839	+	1	0	1	1	1	2.1e-09	2.21e-08	5.25014	1000	Nfkbil1	Nfkbil1	protein_coding
chr1	127009001	127010001		1167	-589	ENSRNOG00000012698	+	0	0	1	0	0	1.68e-09	1.81e-08	5.25011	1000	Chsy1	Chsy1	protein_coding
chr3	119174001	119175001		4995	184	ENSRNOG00000010729	+	0	0	1	0	1	8.12e-05	0.000265168	5.2474	1000	Usp8	Usp8	protein_coding
chr12	36492001	36493001		16519	62695	ENSRNOG00000000967	-	0	0	0	0	0	5.85e-10	7.04e-09	5.24476	1000	Aacs	Aacs	protein_coding
chr10	57276001	57277001		14275	-294	ENSRNOG00000003975	-	0	0	1	0	0	5.85e-08	4.42e-07	5.24271	1000	Pfn1	Pfn1	protein_coding
chr7	140483001	140484001		11207	0	ENSRNOG00000059605	-	1	0	1	1	1	0.000362607	0.000966111	5.23913	1000	Ddn	Ddn	protein_coding
chr3	165693001	165694001		5550	6490	ENSRNOG00000042101	-	0	0	0	1	1	0.00377348	0.00735599	5.23785	1000	Zfp93	Zfp93	protein_coding
chr9	88078001	88079001		13301	0	ENSRNOG00000053377	-	0	0	1	1	1	3.61e-09	3.61e-08	5.23709	1000	AC103270.1	Irs1	pseudogene
chr1	243589001	243590001		2257	0	ENSRNOG00000016284	+	1	0	1	1	0	1.25e-11	2.23e-10	5.23585	1000	Dmrt3	Dmrt3	protein_coding
chr7	70617001	70618001		10501	2385	ENSRNOG00000006946	+	0	0	0	1	1	4.89e-06	2.27e-05	5.23521	1000	Arhgap9	Arhgap9	protein_coding
chr20	12226001	12227001		22378	800	ENSRNOG00000001229	+	0	0	1	0	1	0.000294863	0.000804584	5.23381	1000	Col18a1	Col18a1	protein_coding
chr11	45511001	45512001		15635	-41	ENSRNOG00000001640	-	0	0	1	0	0	2.29e-07	1.5e-06	5.23213	1000	Tomm70	Tomm70	protein_coding
chr1	220854001	220855001		2012	0	ENSRNOG00000020587	+	1	0	1	1	1	9.59e-05	0.000306292	5.23191	1000	Efemp2	Efemp2	protein_coding
chr12	46914001	46915001		16807	-135	ENSRNOG00000001156	+	0	0	1	0	1	0.00124473	0.00281674	5.23017	1000	Msi1	Msi1	protein_coding
chr5	69833001	69834001		7408	0	ENSRNOG00000010332	+	1	0	1	1	1	0.000135999	0.000414801	5.23009	1000	Nipsnap3b	Nipsnap3b	protein_coding
chr14	83945001	83946001		18251	47885	ENSRNOG00000019624	+	0	1	0	1	1	0.00014515	0.000437902	5.22318	1000	Morc2	Morc2	protein_coding
chr7	11446001	11447001		9938	-1216	ENSRNOG00000020161	-	0	0	1	0	0	0.00152067	0.00334251	5.22174	1000	Zbtb7a	Zbtb7a	protein_coding
chr20	5113001	5114001		22136	0	ENSRNOG00000000847	-	1	0	1	1	1	6.2e-11	9.28e-10	5.2193	1000	Csnk2b	Gpank1	protein_coding
chr4	725001	726001		5790	1692	ENSRNOG00000006120	-	0	0	0	0	1	1.82e-14	6.23e-13	5.21881	1000	Shh	Shh	protein_coding
chr4	40040001	40041001		6013	-3439	ENSRNOG00000057290	-	0	0	1	0	0	5.48e-05	0.00018934	5.2136	1000	Tmem168	Tmem168	protein_coding
chr5	171243001	171244001		8619	105	ENSRNOG00000025034	+	0	0	1	0	1	3.5e-06	1.69e-05	5.21345	1000	RGD1304567	RGD1304567	protein_coding
chr20	7484001	7485001		22254	0	ENSRNOG00000000498	+	1	0	1	1	1	1.9e-11	3.19e-10	5.21314	1000	Anks1a	Anks1a	protein_coding
chr13	51816001	51817001		17182	20135	ENSRNOG00000005038	+	0	0	0	1	1	2.67e-08	2.17e-07	5.2128	1000	Ube2t	Ube2t	protein_coding
chr3	119678001	119679001		5004	0	ENSRNOG00000022727	-	1	0	1	1	1	2.7e-06	1.35e-05	5.21187	1000	Tmem127	Tmem127	protein_coding
chr20	27895001	27896001		22511	-7066	ENSRNOG00000060789	-	0	0	0	0	0	4.91e-05	0.00017174	5.20879	1000	U6	Lims1	snRNA
chr17	19580001	19581001		20164	0	ENSRNOG00000017250	-	1	0	1	1	1	7.6e-07	4.41e-06	5.20646	1000	Gmpr	Gmpr	protein_coding
chr13	103396001	103397001		17572	0	ENSRNOG00000002397	+	1	0	1	1	0	1.36e-09	1.5e-08	5.19949	1000	Slc30a10	Gprc5c	protein_coding
chr8	50741001	50742001		11785	-130102	ENSRNOG00000052416	+	0	0	0	0	0	1.81e-07	1.21e-06	5.19864	1000	AABR07070087.1	LOC500990	snoRNA
chr5	60871001	60872001		7346	0	ENSRNOG00000049164	-	1	0	1	1	1	3.12e-08	2.5e-07	5.19491	1000	AC136163.1	Exosc3	miRNA
chr3	113090001	113091001		4941	771	ENSRNOG00000043002	-	0	0	1	1	0	0.00118997	0.00270798	5.19468	1000	Lcmt2	Lcmt2	protein_coding
chr16	19877001	19878001		19338	2968	ENSRNOG00000017552	+	0	0	1	0	0	2.72e-10	3.6e-09	5.18978	1000	Mrpl34	Fermt2	protein_coding
chr1	127803001	127804001		1175	24	ENSRNOG00000037080	+	0	0	1	1	1	6.7e-19	5.62e-17	5.18699	1000	Adamts17	Cers3	protein_coding
chr10	84215001	84216001		14710	644	ENSRNOG00000008506	+	0	0	1	1	1	8.25e-05	0.000268365	5.18683	1000	Hoxb1	Hoxb3	protein_coding
chr5	58393001	58394001		7285	0	ENSRNOG00000000130	+	1	0	1	1	1	2.57e-19	2.4e-17	5.18639	1000	Dnajb5	Dnajb5	protein_coding
chr1	162083001	162084001		1381	0	ENSRNOG00000011882	+	1	0	1	1	1	1.54e-11	2.67e-10	5.18174	1000	Gab2	Gab2	protein_coding
chr3	46457001	46458001		4489	0	ENSRNOG00000007012	-	1	0	1	1	1	1.09e-08	9.71e-08	5.1804	1000	Ly75	Mir6216	protein_coding
chr16	20685001	20686001		19423	318	ENSRNOG00000020030	-	0	0	1	0	1	5.32e-07	3.21e-06	5.18035	1000	Crlf1	Crlf1	protein_coding
chr10	109424001	109425001		15384	3816	ENSRNOG00000058777	+	0	0	0	1	1	1.98e-28	9.12e-26	5.18002	1000	AABR07030919.1	Actg1	lincRNA
chrX	71199001	71200001		22942	0	ENSRNOG00000003812	+	1	0	1	1	1	0.00172372	0.00373162	5.1779	1000	Nlgn3	Nlgn3	protein_coding
chr9	76179001	76180001		13194	-260187	ENSRNOG00000032306	+	0	0	0	0	0	1.21e-14	4.31e-13	5.17232	1000	RGD1562431	Erbb4	protein_coding
chr8	93493001	93494001		12189	880	ENSRNOG00000010694	+	1	0	1	1	0	2.41e-19	2.27e-17	5.17033	1000	Tpbg	Tpbg	protein_coding
chr7	139907001	139908001		11181	0	ENSRNOG00000032447	-	1	0	1	1	1	1.95e-20	2.31e-18	5.16977	1000	Zfp641	Zfp641	protein_coding
chr10	34166001	34167001		13907	0	ENSRNOG00000002388	-	1	0	1	1	0	1.35e-08	1.17e-07	5.16829	1000	Trim41	Trim41	protein_coding
chr15	28672001	28673001		18682	0	ENSRNOG00000025011	-	1	0	1	1	1	2.57e-06	1.3e-05	5.16783	1000	Chd8	Chd8	protein_coding
chr9	81518001	81519001		13214	0	ENSRNOG00000014289	+	1	0	1	1	1	2.28e-24	5.52e-22	5.16704	1000	Arpc2	Arpc2	protein_coding
chr10	15460001	15461001		13782	-105	ENSRNOG00000050424	-	0	0	1	0	1	5.01e-06	2.32e-05	5.16661	1000	Nme4	Decr2	protein_coding
chr8	22838001	22839001		11550	-4986	ENSRNOG00000060000	-	0	0	1	1	1	0.000798237	0.00191487	5.16644	1000	AC119556.1	Kank2	miRNA
chr4	6560001	6561001		5818	457	ENSRNOG00000009085	+	1	0	1	1	1	8.34e-07	4.79e-06	5.16579	1000	Prkag2	Galntl5	protein_coding
chr13	51973001	51974001		17187	28	ENSRNOG00000005988	+	1	0	1	1	1	2.02e-11	3.36e-10	5.16505	1000	Arl8a	Arl8a	protein_coding
chr4	66624001	66625001		6177	0	ENSRNOG00000007034	-	1	0	1	1	1	6.73e-12	1.28e-10	5.16493	1000	Hipk2	Hipk2	protein_coding
chr8	12356001	12357001		11445	235	ENSRNOG00000024863	+	1	0	1	1	1	2.25e-05	8.69e-05	5.16393	1000	Fam76b	Fam76b	protein_coding
chr10	105600001	105601001		15247	0	ENSRNOG00000011459	-	1	0	1	1	1	3.77e-08	2.97e-07	5.1621	1000	Rhbdf2	Rhbdf2	protein_coding
chr20	5508001	5509001		22160	-60	ENSRNOG00000000479	+	0	0	1	0	0	3.64e-07	2.28e-06	5.16174	1000	Kifc1	Kifc1	protein_coding
chrX	37054001	37055001		22875	27594	ENSRNOG00000032132	+	0	0	0	0	0	0.000386911	0.0010229	5.16129	1000	AABR07037998.1	Adgrg2	protein_coding
chr4	146259001	146260001		6668	-16863	ENSRNOG00000006527	+	0	0	0	0	0	0.000144067	0.000435227	5.15975	1000	Slc6a1	Slc6a1	protein_coding
chr10	69738001	69739001		14491	580	ENSRNOG00000007455	+	0	0	1	0	1	7.67e-09	7.12e-08	5.1583	1000	Tmem132e	Tmem132e	protein_coding
chr10	56491001	56492001		14242	0	ENSRNOG00000015669	-	1	0	1	1	0	6.29e-07	3.73e-06	5.1582	1000	Kctd11	Kctd11	protein_coding
chr1	97885001	97886001		933	-99512	ENSRNOG00000014455	-	0	0	0	0	0	3.48e-09	3.49e-08	5.15711	1000	LOC499136	LOC499136	protein_coding
chr1	64831001	64832001		370	-49	ENSRNOG00000056327	-	0	0	1	0	0	0.000253098	0.000706373	5.15357	1000	AABR07002010.1	Vom2r12	lincRNA
chr10	98760001	98761001		15088	53042	ENSRNOG00000004437	+	0	0	0	0	1	8.7e-05	0.000280716	5.15299	1000	Map2k6	Map2k6	protein_coding
chr10	96015001	96016001		15055	0	ENSRNOG00000003262	-	1	0	1	1	1	2.81e-05	0.000105847	5.15259	1000	Cacng4	Cacng4	protein_coding
chr19	38670001	38671001		21658	772	ENSRNOG00000020129	+	0	0	1	1	1	3.03e-07	1.94e-06	5.15177	1000	Cdh3	Cdh3	protein_coding
chr11	38351001	38352001		15612	0	ENSRNOG00000001620	-	1	0	1	1	0	1e-17	6.87e-16	5.15	1000	Prdm15	C2cd2	protein_coding
chr5	126977001	126978001		7644	546	ENSRNOG00000010620	+	0	0	1	1	1	8.9e-06	3.86e-05	5.14924	1000	Ndc1	Ndc1	protein_coding
chr4	117154001	117155001		6459	-95	ENSRNOG00000056009	-	0	0	1	0	0	1.13e-08	1.01e-07	5.1485	1000	Rab11fip5	Sfxn5	protein_coding
chr14	108411001	108412001		18440	-153	ENSRNOG00000054896	+	1	0	1	1	1	7.93e-17	4.56e-15	5.14604	1000	Pex13	Pex13	protein_coding
chr2	213071001	213072001		3779	106633	ENSRNOG00000017187	-	0	0	0	0	0	0.000144292	0.000435611	5.14368	1000	Prmt6	Ntng1	protein_coding
chr15	13633001	13634001		18582	218738	ENSRNOG00000058360	-	0	0	0	0	0	3.24e-11	5.2e-10	5.14317	1000	AABR07017156.1	Ptprg	snoRNA
chr14	4351001	4352001		17726	-10718	ENSRNOG00000002117	+	0	0	0	0	0	0.00287901	0.00582075	5.14241	1000	Barhl2	Barhl2	protein_coding
chr17	20977001	20978001		20174	-19984	ENSRNOG00000061345	+	0	0	0	0	0	0.00195151	0.00415795	5.14239	1000	LOC690414	LOC690414	lincRNA
chr14	84496001	84497001		18271	13328	ENSRNOG00000007002	+	1	0	0	1	1	1.36e-10	1.92e-09	5.1418	1000	Lif	Lif	protein_coding
chr7	72327001	72328001		10526	129	ENSRNOG00000006278	-	0	0	1	1	0	5.84e-05	0.000199918	5.14008	1000	Tspyl5	Mtdh	protein_coding
chr8	56393001	56394001		11824	0	ENSRNOG00000012123	-	1	0	1	1	0	5.62e-05	0.000193408	5.1394	1000	Fdx1	Fdx1	protein_coding
chr5	60658001	60659001		7344	0	ENSRNOG00000062108	-	1	1	1	1	1	1.21e-08	1.07e-07	5.13938	1000	Tomm5	Polr1e	protein_coding
chr1	80125001	80126001		539	-9392	ENSRNOG00000016362	+	0	0	0	0	0	0.000276583	0.000762504	5.13713	1000	Gpr4	Gpr4	protein_coding
chr4	152057001	152058001		6725	69924	ENSRNOG00000000021	+	0	0	0	0	0	1.9e-10	2.59e-09	5.13437	1000	AABR07061902.1	Fbxl14	pseudogene
chr12	41484001	41485001		16672	123	ENSRNOG00000001377	-	1	0	1	1	1	8.69e-08	6.31e-07	5.13342	1000	Ddx54	Ddx54	protein_coding
chr20	46044001	46045001		22662	0	ENSRNOG00000000312	-	1	0	1	1	1	0.000623713	0.00154512	5.13313	1000	Fig4	Fig4	protein_coding
chr1	94495001	94496001		920	-22	ENSRNOG00000014786	-	0	0	1	0	0	3.4e-20	3.74e-18	5.13199	1000	Ccne1	Ccne1	protein_coding
chr9	82008001	82009001		13228	0	ENSRNOG00000017248	-	1	0	1	1	1	0.00529681	0.00980807	5.12846	1000	Prkag3	Prkag3	protein_coding
chr2	124149001	124150001		3206	0	ENSRNOG00000017420	-	1	0	1	1	1	4.39e-12	8.7e-11	5.12806	1000	Nudt6	Nudt6	protein_coding
chr9	10950001	10951001		12724	-1375	ENSRNOG00000049918	+	0	1	1	1	0	0.00466415	0.008814	5.12528	1000	Lrg1	Lrg1	protein_coding
chr8	70994001	70995001		12024	0	ENSRNOG00000015019	+	1	0	1	1	1	1.83e-07	1.22e-06	5.12425	1000	Spg21	Spg21	protein_coding
chr5	160555001	160556001		8394	0	ENSRNOG00000028064	-	1	0	1	1	0	0.000351264	0.000939378	5.12053	1000	Fhad1	Tmem51	protein_coding
chr4	162831001	162832001		6858	0	ENSRNOG00000061420	-	0	0	1	1	1	3.12e-09	3.19e-08	5.12002	1000	AABR07062154.1	Clec2e	pseudogene
chr19	39646001	39647001		21674	0	ENSRNOG00000014097	-	1	0	1	1	1	1.95e-09	2.07e-08	5.11998	1000	Psmd7	Psmd7	protein_coding
chr1	261158001	261159001		2371	0	ENSRNOG00000050585	+	1	0	1	1	1	2.66e-15	1.09e-13	5.1129	1000	Pgam1	Pgam1	protein_coding
chr10	56847001	56848001		14263	1256	ENSRNOG00000018829	-	0	0	0	1	1	1.13e-12	2.49e-11	5.10954	1000	RGD1308134	RGD1308134	protein_coding
chr6	86651001	86652001		9199	0	ENSRNOG00000023230	+	1	0	1	1	1	8.79e-17	4.97e-15	5.10513	1000	RGD1307621	RGD1307621	protein_coding
chr19	58735001	58736001		21979	0	ENSRNOG00000028580	-	0	0	1	1	1	2.7e-08	2.19e-07	5.10243	1000	Pcnx2	Kcnk1	protein_coding
chr16	35703001	35704001		19532	129944	ENSRNOG00000038976	+	0	0	0	0	1	0.00369059	0.00722184	5.10168	1000	Galntl6	Galnt7	protein_coding
chr8	59344001	59345001		11851	0	ENSRNOG00000023633	+	1	0	1	1	1	7.42e-05	0.000246102	5.10111	1000	Crabp1	Crabp1	protein_coding
chr8	48619001	48620001		11729	0	ENSRNOG00000008862	-	0	0	1	1	1	1.77e-06	9.35e-06	5.1009	1000	Abcg4	Abcg4	protein_coding
chr1	45883001	45884001		255	-39223	ENSRNOG00000017030	+	0	0	0	0	0	1.17e-06	6.5e-06	5.10081	1000	Arid1b	Ldhal6b	protein_coding
chr20	4818001	4819001		22116	0	ENSRNOG00000000841	-	1	0	1	1	1	1.97e-17	1.29e-15	5.10059	1000	Ddx39b	Ddx39b	protein_coding
chr2	98253001	98254001		3096	77	ENSRNOG00000008748	+	1	0	1	1	1	8.92e-06	3.87e-05	5.09948	1000	Pex2	Pex2	protein_coding
chrX	11600001	11601001		22794	-47990	ENSRNOG00000034240	+	0	0	0	0	0	0.00156275	0.00342091	5.09824	1000	Bcor	Bcor	protein_coding
chr13	89452001	89453001		17418	-18187	ENSRNOG00000046452	-	0	0	0	0	0	0.000347567	0.000930501	5.09601	1000	Fcgr2b	Cfap126	protein_coding
chr12	24578001	24579001		16408	0	ENSRNOG00000046252	-	1	0	1	1	1	2.63e-08	2.15e-07	5.09459	1000	Tbl2	Bcl7b	protein_coding
chr10	66482001	66483001		14457	0	ENSRNOG00000012818	-	1	0	1	1	0	9.8e-07	5.55e-06	5.09271	1000	Ksr1	Ksr1	protein_coding
chr15	33109001	33110001		18703	331	ENSRNOG00000011592	+	1	0	1	1	1	5.06e-08	3.88e-07	5.09212	1000	Lrp10	Lrp10	protein_coding
chr17	76137001	76138001		20508	50980	ENSRNOG00000023593	-	0	1	0	1	0	0.000468113	0.00120812	5.09066	1000	Upf2	Echdc3	protein_coding
chr16	19800001	19801001		19331	0	ENSRNOG00000017156	+	0	0	1	1	1	1.16e-06	6.45e-06	5.09027	1000	Ankle1	Babam1	protein_coding
chr5	63782001	63783001		7393	201	ENSRNOG00000005964	+	1	0	1	1	1	2.22e-06	1.14e-05	5.09018	1000	Nr4a3	Nr4a3	protein_coding
chr9	52688001	52689001		13064	134	ENSRNOG00000003825	+	0	0	1	0	1	1.73e-06	9.17e-06	5.08581	1000	Wdr75	Wdr75	protein_coding
chr3	119619001	119620001		5002	0	ENSRNOG00000012151	-	1	0	1	1	1	0.00312932	0.00626414	5.08361	1000	Itpripl1	Itpripl1	protein_coding
chr4	171176001	171177001		6899	0	ENSRNOG00000027592	-	1	0	1	1	1	6.32e-10	7.56e-09	5.08354	1000	Rerg	Ptpro	protein_coding
chr1	214182001	214183001		1851	0	ENSRNOG00000016697	+	1	0	1	1	1	5.07e-09	4.89e-08	5.08185	1000	Lrrc56	Lrrc56	protein_coding
chr4	7967001	7968001		5880	-1286	ENSRNOG00000047430	+	0	0	1	0	0	2.08e-13	5.43e-12	5.07747	1000	AABR07059193.1	Pus7	snoRNA
chr11	72103001	72104001		15779	5965	ENSRNOG00000038610	-	0	0	0	0	0	6.07e-05	0.000206933	5.07616	1000	AABR07034445.1	LOC102549772	protein_coding
chr2	55716001	55717001		2976	-30319	ENSRNOG00000028930	+	0	0	0	0	0	1.02e-06	5.76e-06	5.07576	1000	Dab2	Dab2	protein_coding
chr10	95768001	95769001		15049	-1155	ENSRNOG00000003213	+	0	0	1	0	0	1.81e-11	3.06e-10	5.07527	1000	Helz	Helz	protein_coding
chr12	23123001	23124001		16366	-6440	ENSRNOG00000058330	+	0	0	0	0	0	0.00456977	0.00866511	5.07275	1000	AABR07035813.1	Col26a1	lincRNA
chr17	56992001	56993001		20404	0	ENSRNOG00000015292	-	1	0	1	1	1	2.63e-16	1.34e-14	5.07199	1000	Cul2	Cul2	protein_coding
chr3	172154001	172155001		5660	0	ENSRNOG00000005281	+	1	0	1	1	0	1.35e-05	5.56e-05	5.07167	1000	Stx16	Stx16	protein_coding
chr10	39054001	39055001		13979	0	ENSRNOG00000033065	-	1	0	1	1	0	0.000502302	0.00128246	5.06959	1000	Rad50	Rad50	protein_coding
chr10	13075001	13076001		13675	0	ENSRNOG00000003721	-	1	0	1	1	1	2.61e-13	6.65e-12	5.06749	1000	Paqr4	Paqr4	protein_coding
chr5	152471001	152472001		8142	1869	ENSRNOG00000016491	-	1	1	0	1	0	1.03e-07	7.32e-07	5.06537	1000	Fam110d	Fam110d	protein_coding
chr16	21289001	21290001		19475	126	ENSRNOG00000020622	+	0	0	1	1	1	0.000205138	0.000590308	5.06439	1000	Cilp2	Cilp2	protein_coding
chr18	63487001	63488001		21091	28	ENSRNOG00000017453	-	0	0	1	1	1	1.13e-07	7.93e-07	5.06272	1000	Ptpn2	Ptpn2	protein_coding
chr3	137969001	137970001		5132	0	ENSRNOG00000005707	-	1	0	1	1	1	3.15e-18	2.32e-16	5.06058	1000	Bfsp1	Bfsp1	protein_coding
chr4	120817001	120818001		6530	0	ENSRNOG00000016255	-	1	0	1	1	1	1.82e-06	9.59e-06	5.06043	1000	Podxl2	Podxl2	protein_coding
chr5	126856001	126857001		7642	0	ENSRNOG00000009983	-	1	0	1	1	1	6.38e-11	9.54e-10	5.05894	1000	Lrrc42	Hspb11	protein_coding
chr4	100207001	100208001		6378	-1952	ENSRNOG00000010930	+	1	0	1	1	1	4.92e-10	6.06e-09	5.05698	1000	Usp39	Usp39	protein_coding
chr14	80248001	80249001		18165	0	ENSRNOG00000008182	+	1	0	1	1	1	0.00445091	0.00846863	5.0552	1000	Htra3	Htra3	protein_coding
chr10	10968001	10969001		13622	344	ENSRNOG00000003328	+	0	0	1	0	1	0.000685873	0.00168162	5.0534	1000	Cdip1	Cdip1	protein_coding
chr11	41869001	41870001		15620	14375	ENSRNOG00000057860	-	0	0	0	0	0	6.02e-07	3.58e-06	5.05168	1000	AABR07033869.1	Arl6	lincRNA
chr6	126170001	126171001		9547	0	ENSRNOG00000007062	+	1	0	1	1	1	7.74e-07	4.48e-06	5.05137	1000	Rin3	Rin3	protein_coding
chrX	110818001	110819001		23012	0	ENSRNOG00000055721	+	1	0	1	1	1	8.86e-12	1.64e-10	5.04759	1000	Rnf128	Rnf128	protein_coding
chr4	80915001	80916001		6271	-65732	ENSRNOG00000057253	-	0	0	0	0	0	3.84e-05	0.000138406	5.0426	1000	AABR07060560.3	Mir148a	lincRNA
chr13	50499001	50500001		17154	0	ENSRNOG00000028368	-	1	0	1	1	0	0.000268743	0.000743966	5.04154	1000	Etnk2	Etnk2	protein_coding
chr7	35070001	35071001		10295	0	ENSRNOG00000006983	+	1	0	1	1	1	3.07e-09	3.14e-08	5.03657	1000	Nr2c1	Nr2c1	protein_coding
chr6	125082001	125083001		9534	-21520	ENSRNOG00000027773	-	0	0	0	0	0	1.02e-09	1.15e-08	5.03514	1000	Ppp4r3a	Ppp4r3a	protein_coding
chr6	26138001	26139001		8888	0	ENSRNOG00000025388	-	0	0	1	1	1	0.000247261	0.000692976	5.0336	1000	Mrpl33	Rbks	protein_coding
chr13	36531001	36532001		17064	-759	ENSRNOG00000056580	+	0	0	1	0	0	0.000151204	0.000453704	5.02855	1000	En1	C1ql2	protein_coding
chr12	2134001	2135001		16028	0	ENSRNOG00000000986	+	1	0	1	1	1	3.29e-12	6.67e-11	5.0282	1000	Camsap3	Camsap3	protein_coding
chr12	45027001	45028001		16765	116	ENSRNOG00000001136	+	0	0	1	1	1	1.76e-05	7.01e-05	5.02573	1000	Pebp1	Pebp1	protein_coding
chr16	20022001	20023001		19355	1558	ENSRNOG00000018326	+	0	0	1	1	1	2.03e-05	7.93e-05	5.02116	1000	Pgls	Pgls	protein_coding
chr8	116421001	116422001		12388	367	ENSRNOG00000016827	-	0	0	1	0	1	1.53e-08	1.3e-07	5.0211	1000	Slc38a3	Slc38a3	protein_coding
chr10	91447001	91448001		14963	478	ENSRNOG00000028569	-	0	0	1	1	1	6.88e-09	6.48e-08	5.02107	1000	Arhgap27	Arhgap27	protein_coding
chr5	34008001	34009001		7165	82	ENSRNOG00000007139	+	0	0	1	1	1	1.86e-11	3.13e-10	5.01788	1000	Ttpa	Ttpa	protein_coding
chr1	211581001	211582001		1825	-78	ENSRNOG00000036649	+	0	0	1	0	0	1.68e-08	1.41e-07	5.0167	1000	Pwwp2b	Pwwp2b	protein_coding
chr10	84153001	84154001		14697	850	ENSRNOG00000008010	+	0	1	1	1	1	0.000136815	0.00041662	5.01294	1000	Hoxb5	Hoxb5	protein_coding
chr5	147112001	147113001		7986	34616	ENSRNOG00000051507	-	0	0	0	0	0	3.36e-06	1.64e-05	5.01089	1000	Azin2	Azin2	protein_coding
chr4	159193001	159194001		6816	-476	ENSRNOG00000019750	-	0	0	1	0	0	5.42e-11	8.27e-10	5.00938	1000	Kcna1	Kcna1	protein_coding
chr3	120726001	120727001		5019	0	ENSRNOG00000016551	+	1	1	1	1	0	1.94e-08	1.61e-07	5.00893	1000	Bcl2l11	Bcl2l11	protein_coding
chr10	102268001	102269001		15120	273	ENSRNOG00000028946	-	0	0	1	0	1	1.35e-08	1.17e-07	5.0084	1000	Cdc42ep4	Cdc42ep4	protein_coding
chr2	121155001	121156001		3172	1517	ENSRNOG00000041989	+	0	0	0	0	0	0.00128067	0.002886	5.00689	1000	AABR07010030.1	Sox2	miRNA
chr17	61235001	61236001		20425	96007	ENSRNOG00000018685	-	0	0	0	0	0	6.35e-08	4.76e-07	5.00519	1000	AABR07028237.1	Wac	processed_pseudogene
chr16	6685001	6686001		19217	4698	ENSRNOG00000052302	-	0	0	0	0	0	8.99e-05	0.000288704	5.00333	1000	AABR07024580.1	Prkcd	lincRNA
chr17	84813001	84814001		20558	16186	ENSRNOG00000033330	-	0	0	0	0	0	2.71e-05	0.000102547	5.00243	1000	Skida1	Mllt10	protein_coding
chr2	58463001	58464001		2995	53	ENSRNOG00000054157	+	1	0	1	1	1	6.85e-08	5.09e-07	4.99952	1000	Nadk2	Nadk2	protein_coding
chr1	153741001	153742001		1358	-97	ENSRNOG00000017307	-	0	0	1	0	1	1.88e-05	7.45e-05	4.99874	1000	Prss23	Prss23	protein_coding
chr10	92191001	92192001		14980	0	ENSRNOG00000004900	+	0	0	1	1	1	1.18e-21	1.69e-19	4.99863	1000	Crhr1	Crhr1	protein_coding
chr16	50502001	50503001		19609	0	ENSRNOG00000059962	+	0	0	1	1	1	1.33e-10	1.87e-09	4.99802	1000	AABR07025787.1	Fat1	pseudogene
chr3	110491001	110492001		4894	399	ENSRNOG00000042446	-	0	0	1	1	0	2.58e-06	1.3e-05	4.99632	1000	Ankrd63	Plcb2	protein_coding
chr16	82483001	82484001		19835	33528	ENSRNOG00000059470	-	0	0	0	0	0	5.04e-06	2.33e-05	4.99581	1000	7SK	Tubgcp3	misc_RNA
chr7	80351001	80352001		10595	0	ENSRNOG00000056487	+	1	0	1	1	1	6.33e-23	1.17e-20	4.99571	1000	Oxr1	Oxr1	protein_coding
chr10	7041001	7042001		13596	0	ENSRNOG00000002610	+	1	0	1	1	1	4.18e-10	5.24e-09	4.99391	1000	Carhsp1	Carhsp1	protein_coding
chr15	19734001	19735001		18605	-35	ENSRNOG00000008641	-	0	0	1	0	0	2.6e-09	2.69e-08	4.99299	1000	Gnpnat1	Gnpnat1	protein_coding
chr18	51997001	51998001		20982	-18	ENSRNOG00000023013	-	0	0	1	0	1	0.000406396	0.00106785	4.99286	1000	Marchf3	2026-03-03	protein_coding
chr11	75606001	75607001		15821	-149221	ENSRNOG00000036327	+	0	0	0	0	0	3.67e-05	0.00013305	4.99273	1000	AABR07034544.1	Mb21d2	miRNA
chr3	15433001	15434001		4389	0	ENSRNOG00000005996	-	0	0	1	1	1	1.53e-05	6.2e-05	4.99159	1000	Lhx6	Lhx6	protein_coding
chr10	108396001	108397001		15352	142	ENSRNOG00000047656	+	1	0	1	1	1	2.05e-05	7.98e-05	4.99041	1000	Gaa	Gaa	protein_coding
chr18	59816001	59817001		21045	772	ENSRNOG00000053900	+	0	0	1	0	1	0.000137651	0.000418879	4.98948	1000	AABR07032289.1	RGD1562699	lincRNA
chr7	27031001	27032001		10222	-46602	ENSRNOG00000009088	-	0	0	0	0	0	0.000253939	0.000708274	4.98576	1000	Txnrd1	Txnrd1	protein_coding
chr13	26173001	26174001		17016	759	ENSRNOG00000002821	+	0	0	1	1	1	1.7e-25	4.83e-23	4.98454	1000	Phlpp1	Fbxw9	protein_coding
chr7	126913001	126914001		11025	0	ENSRNOG00000021285	-	1	0	1	1	0	1.01e-18	8.1e-17	4.98269	1000	Celsr1	Cerk	protein_coding
chr18	56355001	56356001		21014	0	ENSRNOG00000060334	-	0	0	1	1	1	0.000503927	0.00128636	4.97994	1000	Cdx1	Pdgfrb	protein_coding
chr7	116926001	116927001		10739	0	ENSRNOG00000007939	-	1	0	1	1	1	0.000811503	0.00194041	4.97943	1000	Naprt	Naprt	protein_coding
chr14	2390001	2391001		17690	-18119	ENSRNOG00000000065	-	0	0	0	0	0	4.29e-05	0.000152947	4.97908	1000	Pde6b	Pde6b	protein_coding
chr19	48196001	48197001		21751	0	ENSRNOG00000012428	-	1	0	1	1	0	1.15e-15	5.16e-14	4.97751	1000	Maf	Maf	protein_coding
chr9	10380001	10381001		12688	-10065	ENSRNOG00000049785	-	0	0	0	0	0	1.68e-07	1.14e-06	4.97677	1000	Ranbp3	Vmac	protein_coding
chr10	36346001	36347001		13944	63	ENSRNOG00000000233	+	1	0	1	1	1	1.47e-09	1.61e-08	4.97645	1000	Grm6	Grm6	protein_coding
chr1	203508001	203509001		1757	-732	ENSRNOG00000020637	+	0	0	1	0	0	3.81e-08	2.99e-07	4.97609	1000	Hmx3	Hmx3	protein_coding
chr2	188757001	188758001		3511	0	ENSRNOG00000020663	+	1	1	1	1	1	3.58e-05	0.000130442	4.97574	1000	Pygo2	Pygo2	protein_coding
chr11	81331001	81332001		15844	2121	ENSRNOG00000001821	-	0	1	0	1	1	0.00260045	0.00533109	4.97512	1000	Adipoq	Adipoq	protein_coding
chr1	221710001	221711001		2060	0	ENSRNOG00000021061	+	1	1	1	1	1	0.00173564	0.00375316	4.97264	1000	Map4k2	Map4k2	protein_coding
chr1	78354001	78355001		485	0	ENSRNOG00000015229	+	1	0	1	1	0	1.16e-06	6.47e-06	4.97167	1000	Zc3h4	Sae1	protein_coding
chr2	205783001	205784001		3695	0	ENSRNOG00000018946	+	0	0	1	1	1	3.37e-14	1.07e-12	4.97124	1000	Trim33	Bcas2	protein_coding
chr18	55828001	55829001		21002	0	ENSRNOG00000019235	+	1	0	1	1	1	5.9e-14	1.73e-12	4.97037	1000	Rbm22	Rbm22	protein_coding
chr3	132735001	132736001		5122	-105136	ENSRNOG00000045850	-	0	0	0	0	0	0.00125224	0.00282941	4.96904	1000	AABR07053886.1	Ism1	miRNA
chr15	100177001	100178001		19069	-1880	ENSRNOG00000035657	+	0	0	1	0	0	9.24e-14	2.59e-12	4.96739	1000	Mir17	Mir17	miRNA
chr10	59743001	59744001		14322	0	ENSRNOG00000019352	-	1	0	1	1	1	5.32e-05	0.000184061	4.96556	1000	Emc6	Tax1bp3	protein_coding
chr10	46332001	46333001		14071	0	ENSRNOG00000003348	-	1	0	1	1	0	1.28e-07	8.88e-07	4.96222	1000	Rasd1	Rasd1	protein_coding
chr12	45026001	45027001		16764	0	ENSRNOG00000001136	+	1	0	1	1	0	0.0053569	0.00990558	4.96212	1000	Pebp1	Pebp1	protein_coding
chr5	173659001	173660001		8712	0	ENSRNOG00000020302	-	1	0	1	1	1	2.12e-06	1.09e-05	4.96205	1000	Klhl17	Klhl17	protein_coding
chr3	9113001	9114001		4221	3755	ENSRNOG00000059168	+	0	0	0	0	1	0.000471365	0.00121464	4.96204	1000	LOC102550392	Ier5l	lincRNA
chr3	61669001	61670001		4635	2834	ENSRNOG00000055150	-	0	1	0	1	0	2.63e-08	2.14e-07	4.96199	1000	AABR07052559.2	Hoxd3	pseudogene
chr6	126320001	126321001		9550	0	ENSRNOG00000007089	-	1	0	1	1	1	1.58e-05	6.36e-05	4.95892	1000	Lgmn	Lgmn	protein_coding
chr14	11199001	11200001		17816	0	ENSRNOG00000002270	+	1	0	1	1	1	8.29e-12	1.54e-10	4.95724	1000	Hnrnpdl	Hnrnpdl	protein_coding
chr3	100771001	100772001		4851	27	ENSRNOG00000047466	+	1	0	1	1	1	3.14e-05	0.000116361	4.95415	1000	Bdnf	Bdnf	protein_coding
chr2	5560001	5561001		2688	3273	ENSRNOG00000062218	-	0	0	0	0	1	0.000617848	0.0015323	4.95064	1000	AC099302.1	Nr2f1	lincRNA
chr10	109520001	109521001		15396	0	ENSRNOG00000036701	-	0	0	1	1	1	0.00149884	0.00330322	4.95041	1000	Actg1	Actg1	protein_coding
chr8	66893001	66894001		11961	0	ENSRNOG00000014080	-	1	0	1	1	1	5.3e-09	5.09e-08	4.95035	1000	Kif23	Kif23	protein_coding
chr1	36399001	36400001		222	-444	ENSRNOG00000017613	+	0	0	1	0	0	7.98e-27	2.73e-24	4.94794	1000	Tent4a	Tent4a	protein_coding
chr2	166402001	166403001		3376	0	ENSRNOG00000009310	+	1	0	1	1	1	7.4e-07	4.3e-06	4.94554	1000	Nmd3	Nmd3	protein_coding
chr10	88997001	88998001		14869	0	ENSRNOG00000019983	+	1	0	1	1	1	5e-07	3.04e-06	4.94457	1000	Mlx	Mlx	protein_coding
chr3	177374001	177375001		5771	0	ENSRNOG00000017843	+	1	0	1	1	1	5.12e-07	3.09e-06	4.9438	1000	Polr3k	Polr3k	protein_coding
chr12	40881001	40882001		16662	0	ENSRNOG00000056978	-	0	0	1	1	0	2.92e-08	2.36e-07	4.94283	1000		Rpl6	snoRNA
chr3	175548001	175549001		5712	0	ENSRNOG00000055984	+	1	0	1	1	1	1.14e-16	6.22e-15	4.94163	1000	Adrm1	Adrm1	protein_coding
chr8	97646001	97647001		12222	73	ENSRNOG00000014543	-	1	0	1	1	1	1.96e-06	1.02e-05	4.94082	1000	Tbc1d2b	Tbc1d2b	protein_coding
chrX	26294001	26295001		22845	0	ENSRNOG00000025910	+	1	0	1	1	1	0.0026873	0.00548805	4.9392	1000	Hccs	Hccs	protein_coding
chr8	63803001	63804001		11934	-52471	ENSRNOG00000006490	-	0	0	0	0	0	4.61e-16	2.23e-14	4.93703	1000	Neo1	Hcn4	protein_coding
chr1	132877001	132878001		1202	-13573	ENSRNOG00000051108	+	0	0	0	0	0	3.2e-14	1.03e-12	4.93641	1000	AABR07004244.1	Mctp2	processed_pseudogene
chr5	119903001	119904001		7598	0	ENSRNOG00000023812	+	1	0	1	1	1	1.89e-14	6.4e-13	4.93635	1000	Raver2	Raver2	protein_coding
chr17	78961001	78962001		20536	477	ENSRNOG00000026248	-	0	0	1	0	1	5.56e-05	0.000191763	4.9353	1000	Nmt2	Nmt2	protein_coding
chr10	48240001	48241001		14120	0	ENSRNOG00000002903	+	1	0	1	1	1	1.1e-10	1.58e-09	4.93486	1000	Specc1	Specc1	protein_coding
chr1	212516001	212517001		1837	152	ENSRNOG00000046776	-	0	0	1	1	1	4.82e-05	0.000169181	4.93172	1000	Msx3	Msx3	protein_coding
chr14	82350001	82351001		18211	0	ENSRNOG00000017329	+	1	0	1	1	0	6.49e-06	2.92e-05	4.92749	1000	Tmem129	Tmem129	protein_coding
chr4	182599001	182600001		6981	259	ENSRNOG00000001852	-	0	0	1	0	1	1.3e-08	1.14e-07	4.92732	1000	Ergic2	Ergic2	protein_coding
chr6	105519001	105520001		9384	-254	ENSRNOG00000007271	-	0	0	1	0	0	1.56e-06	8.4e-06	4.92604	1000	Map3k9	Map3k9	protein_coding
chr9	85242001	85243001		13289	0	ENSRNOG00000015055	-	1	0	1	1	1	2.45e-06	1.24e-05	4.92567	1000	Scg2	Scg2	protein_coding
chr9	50868001	50869001		13061	0	ENSRNOG00000011658	-	1	0	1	1	1	5.65e-08	4.29e-07	4.92505	1000	Tex30	Tex30	protein_coding
chr5	169358001	169359001		8574	485	ENSRNOG00000010580	+	0	0	1	0	1	3.45e-06	1.67e-05	4.92289	1000	Acot7	Acot7	protein_coding
chr7	144078001	144079001		11363	0	ENSRNOG00000036852	+	1	0	1	1	1	4.74e-07	2.89e-06	4.92198	1000	Pcbp2	Pcbp2	protein_coding
chr1	90521001	90522001		859	-658	ENSRNOG00000021137	-	0	0	1	0	0	1.01e-07	7.21e-07	4.91866	1000	Kctd15	Kctd15	protein_coding
chr9	82619001	82620001		13264	-12231	ENSRNOG00000019946	+	0	0	0	1	1	6.41e-06	2.89e-05	4.91597	1000	Gmppa	Gmppa	protein_coding
chr12	40680001	40681001		16656	0	ENSRNOG00000001350	-	1	0	1	1	1	3.83e-13	9.28e-12	4.91157	1000	Naa25	Naa25	protein_coding
chr12	37425001	37426001		16548	0	ENSRNOG00000052704	-	1	0	1	1	1	1.56e-07	1.06e-06	4.91068	1000	Atp6v0a2	Tctn2	protein_coding
chr10	67750001	67751001		14478	3	ENSRNOG00000000237	-	0	0	1	1	1	0.000488145	0.00125183	4.91027	1000	RGD1310429	RGD1310429	protein_coding
chr3	94082001	94083001		4808	46097	ENSRNOG00000010963	+	0	0	0	1	1	0.000293491	0.000801661	4.91025	1000	RGD1563222	RGD1563222	protein_coding
chr1	188190001	188191001		1600	0	ENSRNOG00000017012	-	1	0	1	1	1	2.51e-08	2.06e-07	4.90833	1000	Coq7	Coq7	protein_coding
chr14	23611001	23612001		17906	0	ENSRNOG00000021776	+	1	0	1	1	1	0.00408328	0.0078702	4.90714	1000	Cenpc	Cenpc	protein_coding
chr19	16426001	16427001		21379	8185	ENSRNOG00000011180	+	0	0	0	0	0	0.0025815	0.00529795	4.90648	1000	Irx5	Irx5	protein_coding
chr19	25774001	25775001		21521	660	ENSRNOG00000054344	-	0	0	1	1	0	2.25e-09	2.35e-08	4.9062	1000	Ier2	Ier2	pseudogene
chrX	11648001	11649001		22800	0	ENSRNOG00000034240	+	1	0	1	1	0	7.77e-06	3.42e-05	4.9058	1000	Bcor	Bcor	protein_coding
chr13	36156001	36157001		17056	0	ENSRNOG00000046889	-	1	0	1	1	1	0.00059772	0.00148875	4.9043	1000	Dbi	LOC288978	protein_coding
chr17	77339001	77340001		20522	935	ENSRNOG00000018125	-	0	0	1	0	1	0.000297186	0.000809433	4.90363	1000	Sephs1	Sephs1	protein_coding
chr5	169331001	169332001		8569	0	ENSRNOG00000010270	-	1	0	1	1	0	2.06e-06	1.07e-05	4.90285	1000	Espn	Espn	protein_coding
chrX	11570001	11571001		22789	-77990	ENSRNOG00000034240	+	0	0	0	0	0	6.78e-12	1.28e-10	4.90105	1000	Bcor	Bcor	protein_coding
chr7	121480001	121481001		10889	0	ENSRNOG00000017801	+	1	0	1	1	1	3.74e-10	4.75e-09	4.89934	1000	Atf4	Atf4	protein_coding
chr3	103945001	103946001		4863	0	ENSRNOG00000005884	+	1	0	1	1	1	1.33e-10	1.87e-09	4.89931	1000	Emc7	Emc7	protein_coding
chr16	16931001	16932001		19293	-17233	ENSRNOG00000028958	+	0	0	0	0	0	0.000220874	0.000628672	4.89922	1000	AABR07024795.1	Prxl2a	protein_coding
chr7	31536001	31537001		10259	-176731	ENSRNOG00000008022	+	0	0	0	0	1	1.46e-15	6.43e-14	4.8982	1000	Apaf1	Apaf1	protein_coding
[truncated: 3,676 more rows]

## Sheet: DMR-F0NvsF0T
	start			target.row	dist.to.feature	feature.name	feature.strand	UTR5	UTR3	prom	exon	intron	pvalue	qvalue	meth.diff	width	external_gene_name	Gene Name	gene_biotype
chr12	11320001	11321001		17240	-17331	ENSRNOG00000032866	-	0	0	0	0	0	6.8e-29	2.91e-25	-27.782	1000	AABR07035366.1	Arpc1a	processed_pseudogene
chr13	98648001	98649001		18692	32715	ENSRNOG00000002969	+	0	0	0	0	1	3.73e-10	2.64e-08	-26.0131	1000	Itpkb	Itpkb	protein_coding
chr1	141057001	141058001		1314	18497	ENSRNOG00000017120	-	0	0	0	0	1	1.15e-05	0.000144814	-24.7051	1000	Abhd2	Rlbp1	protein_coding
chr1	164426001	164427001		1512	527	ENSRNOG00000017365	+	0	0	1	1	1	7.52e-10	4.75e-08	-23.6761	1000	Klhl35	Rps3	protein_coding
chr4	170606001	170607001		7351	13704	ENSRNOG00000008933	-	0	0	0	0	1	6.4e-08	2.03e-06	-23.6575	1000	Plbd1	Plbd1	protein_coding
chr3	177422001	177423001		6165	24110	ENSRNOG00000056555	+	0	0	0	0	0	7.58e-14	2.06e-11	-23.3486	1000	AABR07054983.1	Polr3k	protein_coding
chr13	44160001	44161001		18253	110398	ENSRNOG00000053218	+	0	0	0	0	0	1.88e-05	0.000214298	-23.2507	1000		Tmem163	snoRNA
chr11	69839001	69840001		16825	-47818	ENSRNOG00000054045	-	0	0	0	0	1	1.53e-07	4.18e-06	-22.225	1000	Metazoa_SRP	Umps	misc_RNA
chr10	95192001	95193001		16077	19112	ENSRNOG00000015329	-	0	0	0	0	0	7.82e-08	2.38e-06	-21.9643	1000	Kpna2	Kpna2	protein_coding
chr5	164977001	164978001		9007	4522	ENSRNOG00000009409	+	0	1	0	1	1	2.13e-07	5.48e-06	-21.827	1000	Fbxo2	Fbxo2	protein_coding
chr10	48630001	48631001		15094	30681	ENSRNOG00000002977	+	0	0	0	1	1	8.17e-06	0.000110195	-21.7316	1000	Ttc19	Ttc19	protein_coding
chr3	168016001	168017001		5970	1411	ENSRNOG00000012906	-	0	0	0	0	1	1.46e-07	4.03e-06	-21.6917	1000	Bcas1	Bcas1	protein_coding
chr6	8434001	8435001		9376	82150	ENSRNOG00000061723	+	0	0	0	0	0	3.14e-10	2.3e-08	-21.4168	1000	U6	Camkmt	snRNA
chr3	82551001	82552001		5100	2043	ENSRNOG00000000008	+	0	0	0	0	1	2.18e-10	1.68e-08	-21.2886	1000	Alx4	Alx4	protein_coding
chr10	92350001	92351001		16028	-5173	ENSRNOG00000062053	-	0	0	0	0	1	1.05e-08	4.33e-07	-20.6837	1000	AABR07030527.2	Mapt	antisense
chr5	166586001	166587001		9059	41029	ENSRNOG00000016846	-	0	0	0	1	1	2.28e-05	0.000249911	-20.5507	1000	Pik3cd	Pik3cd	protein_coding
chr10	88492001	88493001		15879	1204	ENSRNOG00000017496	+	0	0	0	1	1	9.19e-08	2.75e-06	-20.409	1000	Cnp	Cnp	protein_coding
chr8	48252001	48253001		12525	0	ENSRNOG00000054859	-	0	0	1	1	0	5.6e-11	5.27e-09	-20.3142	1000	U6	Thy1	snRNA
chr1	119797001	119798001		1202	-819092	ENSRNOG00000057034	-	0	0	0	0	0	1.05e-06	2.1e-05	-19.8571	1000	AABR07003841.1	Mir344b-3	lincRNA
chr7	126544001	126545001		11771	-45213	ENSRNOG00000035461	+	0	0	0	0	0	7.75e-07	1.65e-05	-19.6559	1000	Mirlet7c2	Mirlet7c2	miRNA
chr5	91134001	91135001		7989	0	ENSRNOG00000056172	+	0	0	1	1	0	0.000117386	0.000922925	-19.375	1000	5_8S_rRNA	Rn5-8s	rRNA
chr6	1047001	1048001		9313	-43001	ENSRNOG00000004577	-	0	0	0	0	0	1.27e-05	0.000156992	-19.2707	1000	Fez2	Fez2	protein_coding
chr3	111137001	111138001		5257	1981	ENSRNOG00000014011	+	0	0	0	1	1	2.95e-06	4.81e-05	-18.8416	1000	Dll4	Dll4	protein_coding
chr8	3272001	3273001		12208	0	ENSRNOG00000033199	-	0	0	1	1	0	2.87e-12	4.28e-10	-18.5512	1000	AABR07068955.1	Vom2r25	protein_coding
chr1	123047001	123048001		1206	16643	ENSRNOG00000010172	-	0	0	0	0	0	2.41e-05	0.000260603	-18.5429	1000	Mkrn3	Peg12	protein_coding
chr13	49454001	49455001		18306	32893	ENSRNOG00000030515	-	0	0	0	0	1	1.57e-06	2.88e-05	-18.0585	1000	Nfasc	Nfasc	protein_coding
chr7	143627001	143628001		12114	-1456	ENSRNOG00000047393	+	0	0	1	0	0	0.00104382	0.00525744	-17.9012	1000	Krt18	Krt18	protein_coding
chr1	81036001	81037001		638	6341	ENSRNOG00000032625	-	0	0	0	1	1	1.38e-09	8.06e-08	-17.7596	1000	AC118165.1	Zfp111	protein_coding
chr6	136516001	136517001		10365	-19737	ENSRNOG00000053631	+	0	0	0	0	0	4.68e-05	0.000440432	-17.5626	1000	Tdrd9	LOC102548399	protein_coding
chr14	9880001	9881001		19006	35408	ENSRNOG00000052046	-	0	0	0	0	0	4.13e-09	2.01e-07	-17.5623	1000	U6	Nkx6-1	snRNA
chr1	188702001	188703001		1706	10271	ENSRNOG00000016013	-	1	0	0	1	1	2.37e-05	0.000256974	-17.5189	1000	Gprc5b	Gprc5b	protein_coding
chr11	71888001	71889001		16859	15172	ENSRNOG00000001752	+	0	0	0	1	0	1.12e-07	3.25e-06	-17.5048	1000	Nrros	Nrros	protein_coding
chr20	56181001	56182001		24318	866	ENSRNOG00000053483	-	0	0	1	0	0	3.71e-06	5.73e-05	-17.4618	1000	AABR07045678.1	Cd99	misc_RNA
chr19	25471001	25472001		22944	-54752	ENSRNOG00000052707	+	0	0	0	0	0	3.04e-11	3.12e-09	-17.4259	1000	Cacna1a	Cacna1a	protein_coding
chr20	29736001	29737001		24077	1507	ENSRNOG00000000572	-	0	0	0	1	0	3.59e-12	5.13e-10	-17.3912	1000	Chst3	Chst3	protein_coding
chr2	33445001	33446001		3069	85996	ENSRNOG00000057265	-	0	0	0	0	0	8.45e-06	0.00011264	-17.3778	1000	7SK	Srek1	misc_RNA
chr1	185040001	185041001		1672	102273	ENSRNOG00000020456	-	0	0	0	0	0	8.89e-07	1.85e-05	-17.3681	1000	Nucb2	Nucb2	protein_coding
chr3	163935001	163936001		5873	0	ENSRNOG00000046949	-	1	0	1	1	1	3.32e-11	3.39e-09	-17.3211	1000	Kcnb1	Kcnb1	protein_coding
chr12	2030001	2031001		17110	13944	ENSRNOG00000000973	+	0	0	0	1	1	3.99e-05	0.000390284	-17.1818	1000	Tex45	Tex45	protein_coding
chr14	9403001	9404001		18995	52991	ENSRNOG00000002142	-	0	0	0	1	1	7.7e-06	0.000105921	-17.1456	1000	Cds1	Cds1	protein_coding
chr12	47261001	47262001		17990	6518	ENSRNOG00000001177	+	0	0	0	1	1	1.29e-05	0.000158931	-17.0613	1000	Acads	Acads	protein_coding
chr7	125796001	125797001		11742	-22	ENSRNOG00000033570	-	0	0	1	0	0	5.07e-08	1.65e-06	-16.9395	1000	Arhgap8	Arhgap8	protein_coding
chr9	63567001	63568001		14008	69678	ENSRNOG00000010188	-	0	0	0	0	1	0.000550919	0.00316443	-16.8269	1000	Satb2	Satb2	protein_coding
chr10	62106001	62107001		15342	14976	ENSRNOG00000062020	+	0	0	0	1	1	0.00118993	0.00581678	-16.6597	1000	AC120096.3	Rtn4rl1	processed_pseudogene
chr7	141133001	141134001		12027	2701	ENSRNOG00000058430	-	0	0	0	1	1	6.73e-05	0.000583341	-16.6564	1000	Bcdin3d	Bcdin3d	protein_coding
chr1	84213001	84214001		752	40646	ENSRNOG00000055371	-	0	0	0	1	1	3.1e-07	7.56e-06	-16.5542	1000	Sptbn4	Sptbn4	protein_coding
chr1	80874001	80875001		633	-5857	ENSRNOG00000019260	+	0	0	0	0	0	2.31e-07	5.84e-06	-16.4444	1000	Ceacam20	Ceacam20	protein_coding
chr10	85713001	85714001		15787	-3434	ENSRNOG00000004091	-	0	1	1	1	1	8.42e-09	3.6e-07	-16.4031	1000	Cwc25	Cwc25	protein_coding
chr4	80911001	80912001		6690	-61732	ENSRNOG00000057253	-	0	0	0	0	0	4.08e-08	1.37e-06	-16.3453	1000	AABR07060560.3	Mir148a	lincRNA
chr7	11055001	11056001		10556	669	ENSRNOG00000005378	+	0	0	1	0	1	0.00124132	0.00601185	-16.2361	1000	Gna15	Agpat3	protein_coding
chr4	50236001	50237001		6458	-35674	ENSRNOG00000039494	-	0	0	0	0	0	0.000183765	0.00132563	-16.1674	1000	Aass	Aass	protein_coding
chr10	43248001	43249001		14982	4297	ENSRNOG00000002582	-	0	0	0	0	0	1.04e-05	0.000133677	-16.158	1000	Hand1	Hand1	protein_coding
chr1	77957001	77958001		499	-9756	ENSRNOG00000021800	+	0	0	0	0	0	0.000223413	0.00153477	-16.1198	1000	Zfp541	Napa	protein_coding
chr14	104201001	104202001		19637	9485	ENSRNOG00000004888	+	0	0	0	0	1	6.87e-05	0.000594224	-16.0264	1000	Spred2	Spred2	protein_coding
chr17	17370001	17371001		21509	-80744	ENSRNOG00000054482	+	0	0	0	0	0	1.93e-06	3.39e-05	-15.9831	1000	7SK	Rnf144b	misc_RNA
chr3	5633001	5634001		4430	8496	ENSRNOG00000027742	+	0	0	0	0	1	0.000331053	0.00210545	-15.9515	1000	Adamtsl2	Mymk	protein_coding
chr1	21002001	21003001		137	-39476	ENSRNOG00000012346	-	0	0	0	0	0	1.87e-14	6.47e-12	-15.6475	1000	Epb41l2	Akap7	protein_coding
chr19	16153001	16154001		22802	12851	ENSRNOG00000058624	-	0	0	0	0	0	0.00157545	0.00726276	-15.5993	1000	AABR07043001.1	Crnde	lincRNA
chr1	85383001	85384001		794	-2471	ENSRNOG00000030266	+	0	0	1	0	0	4.13e-05	0.000399903	-15.4316	1000	Plekhg2	Plekhg2	protein_coding
chr8	116892001	116893001		13250	58	ENSRNOG00000030714	-	0	0	1	1	0	5.83e-06	8.36e-05	-15.4183	1000	Bsn	Apeh	protein_coding
chr13	84024001	84025001		18553	27922	ENSRNOG00000003298	+	0	0	0	0	1	1.52e-06	2.81e-05	-15.3893	1000	Cd247	Cd247	protein_coding
chr4	27813001	27814001		6371	-57899	ENSRNOG00000009163	-	0	0	0	0	1	8.72e-05	0.000723173	-15.3549	1000	Fam133b	Fam133b	protein_coding
chr3	11531001	11532001		4610	-22458	ENSRNOG00000050834	+	0	0	0	0	0	0.00015652	0.00116085	-15.3504	1000	Fam102a	Dpm2	protein_coding
chr13	71073001	71074001		18465	-12746	ENSRNOG00000002369	+	0	0	0	0	0	1.4e-06	2.65e-05	-15.332	1000	Rgs8	Rgs8	protein_coding
chr4	6662001	6663001		6218	102457	ENSRNOG00000009085	+	0	0	0	0	1	1.87e-05	0.000213072	-15.2823	1000	Prkag2	Prkag2	protein_coding
chr1	84802001	84803001		775	-4373	ENSRNOG00000058145	-	0	0	1	0	1	1.12e-06	2.21e-05	-15.1098	1000	7SK	Marcksl1	misc_RNA
chr13	45447001	45448001		18264	-126294	ENSRNOG00000058296	-	0	0	0	0	0	3.47e-06	5.44e-05	-15.07	1000	AABR07020898.1	Cxcr4	miRNA
chr6	134112001	134113001		10310	213207	ENSRNOG00000050073	+	0	0	0	0	0	1.78e-05	0.00020598	-15.0596	1000	Mir3072	Mir3072	miRNA
chr10	61318001	61319001		15313	42251	ENSRNOG00000002652	-	0	0	0	0	1	0.00010252	0.000830425	-15.0355	1000	Rap1gap2	Rap1gap2	protein_coding
chr3	58226001	58227001		4890	-42194	ENSRNOG00000051686	+	0	0	0	0	0	1.86e-05	0.000212875	-15.034	1000	AABR07052502.1	Dlx2	lincRNA
chr1	188701001	188702001		1705	11271	ENSRNOG00000016013	-	0	0	0	1	1	1.74e-05	0.000202822	-15.0082	1000	Gprc5b	Gprc5b	protein_coding
chr13	83135001	83136001		18539	2296	ENSRNOG00000056222	-	0	0	0	0	1	2.82e-11	2.96e-09	-14.9679	1000	AABR07021636.1	Dpt	lincRNA
chrX	22552001	22553001		24405	-111359	ENSRNOG00000060137	-	0	0	0	0	0	0.00115194	0.00568011	-14.8692	1000	AABR07037489.1	Gpr173	protein_coding
chr4	89150001	89151001		6746	185	ENSRNOG00000007304	-	0	1	1	1	1	6.22e-08	1.98e-06	-14.8213	1000	Herc3	Nap1l5	protein_coding
chr10	56412001	56413001		15213	0	ENSRNOG00000015057	-	0	0	1	1	1	1.86e-05	0.000212875	-14.8048	1000	Tmem102	Fgf11	protein_coding
chr16	60206001	60207001		20968	1463	ENSRNOG00000011431	-	0	0	0	1	0	2.34e-05	0.000254637	-14.7917	1000	Mfhas1	Mfhas1	protein_coding
chr10	88301001	88302001		15869	5133	ENSRNOG00000015380	-	0	0	0	0	1	0.000641734	0.00357348	-14.6799	1000	Jup	Jup	protein_coding
chr1	153588001	153589001		1443	-472	ENSRNOG00000016848	+	0	0	1	0	0	1.73e-17	1.56e-14	-14.6019	1000	Fzd4	Fzd4	protein_coding
chr20	4428001	4429001		23587	0	ENSRNOG00000052039	-	0	0	1	1	1	0.000327788	0.00209011	-14.5965	1000	AABR07044388.3	Atf6b	lincRNA
chr2	211811001	211812001		4044	19552	ENSRNOG00000027540	-	0	0	0	0	1	0.000288223	0.00188666	-14.57	1000	Fam102b	Fam102b	protein_coding
chr4	80055001	80056001		6681	51885	ENSRNOG00000010011	-	0	0	0	1	1	0.000186071	0.00133608	-14.4853	1000	Osbpl3	Gsdme	protein_coding
chrX	81107001	81108001		24560	709102	ENSRNOG00000002789	-	0	0	0	0	0	4.3e-06	6.44e-05	-14.4687	1000	AABR07039648.1	LOC681325	protein_coding
chr5	172116001	172117001		9237	-37242	ENSRNOG00000012586	-	0	0	0	0	0	0.000258303	0.00172737	-14.4484	1000	Actrt2	Actrt2	protein_coding
chr9	66152001	66153001		14033	93955	ENSRNOG00000022899	+	0	0	0	0	0	0.000342505	0.00216383	-14.3858	1000	Cdk15	Als2	protein_coding
chr4	160016001	160017001		7284	-3473	ENSRNOG00000060689	+	0	0	1	0	0	3.24e-06	5.15e-05	-14.3167	1000	Parp11	Prmt8	protein_coding
chr8	116686001	116687001		13238	0	ENSRNOG00000032618	+	0	0	1	1	0	0.000788254	0.00421387	-14.2252	1000	Mst1r	Mst1r	protein_coding
chr6	130394001	130395001		10251	192151	ENSRNOG00000057859	+	0	0	0	0	0	0.000280014	0.00184521	-14.2148	1000	AABR07065476.1	Vrk1	lincRNA
chr5	158287001	158288001		8868	25427	ENSRNOG00000018739	-	0	0	0	0	1	0.000716321	0.00390385	-14.1346	1000	Pax7	Pax7	protein_coding
chr7	54118001	54119001		11077	86686	ENSRNOG00000026913	+	0	0	0	0	0	6.81e-06	9.5e-05	-14.1294	1000	Bbs10	Bbs10	protein_coding
chr11	29962001	29963001		16582	88104	ENSRNOG00000021569	-	0	0	0	0	1	0.000118542	0.000930732	-14.1209	1000	Tiam1	Tiam1	protein_coding
chr1	93023001	93024001		954	96448	ENSRNOG00000060688	+	0	0	0	0	0	0.000627623	0.00351547	-14.0907	1000	AABR07003007.1	Tshz3	lincRNA
chr4	115158001	115159001		6858	-739	ENSRNOG00000011387	-	0	0	1	0	0	8.63e-07	1.8e-05	-14.0227	1000	Tet3	Dguok	protein_coding
chr3	58257001	58258001		4891	-11194	ENSRNOG00000051686	+	0	0	0	0	0	8.35e-06	0.000111637	-14.016	1000	AABR07052502.1	Dlx2	lincRNA
chr4	56806001	56807001		6507	844	ENSRNOG00000007437	+	0	0	1	0	1	0.000615546	0.00346594	-13.991	1000	Irf5	Irf5	protein_coding
chr2	27258001	27259001		2999	28606	ENSRNOG00000025377	-	0	0	0	1	1	0.000110114	0.000875388	-13.9427	1000	Ankdd1b	Polk	protein_coding
chr3	123598001	123599001		5417	8353	ENSRNOG00000021242	-	0	0	0	1	1	0.000362072	0.00225339	-13.9005	1000	Adam33	Gfra4	protein_coding
chr14	77642001	77643001		19365	21209	ENSRNOG00000054201	-	0	0	0	0	0	1.28e-09	7.58e-08	-13.8698	1000	AABR07015800.1	Msx1	lincRNA
chr3	2800001	2801001		4381	-1532	ENSRNOG00000016723	-	0	0	1	1	0	2.1e-07	5.42e-06	-13.7843	1000	Phpt1	Phpt1	protein_coding
chr12	41495001	41496001		17815	1611	ENSRNOG00000001378	-	0	0	0	1	1	8.53e-07	1.79e-05	-13.7506	1000	Iqcd	Rita1	protein_coding
chr12	39992001	39993001		17768	-25938	ENSRNOG00000001259	+	0	0	0	0	0	0.000343728	0.00216915	-13.6822	1000	Cux2	Cux2	protein_coding
chr7	2851001	2852001		10514	19998	ENSRNOG00000023456	+	0	1	0	1	1	2.14e-05	0.00023646	-13.617	1000	Rnf41	Rnf41	protein_coding
chr18	81683001	81684001		22681	-796	ENSRNOG00000038241	-	0	0	1	0	0	7.95e-06	0.000108042	-13.5657	1000	LOC100359752	Cyb5a	protein_coding
chrX	156229001	156230001		24719	1172	ENSRNOG00000060839	+	0	0	1	0	0	5e-05	0.000462128	-13.4536	1000	LOC690348	Olr1768	protein_coding
chr17	19435001	19436001		21532	-102144	ENSRNOG00000057683	+	0	0	0	0	1	1.29e-09	7.58e-08	-13.443	1000	AABR07027212.1	Gmpr	pseudogene
chr7	11945001	11946001		10646	14867	ENSRNOG00000018788	+	0	1	0	1	1	0.000335864	0.00213209	-13.3849	1000	Btbd2	Csnk1g2	protein_coding
chr2	84361001	84362001		3266	74913	ENSRNOG00000010888	-	0	1	0	1	0	2.12e-06	3.67e-05	-13.3297	1000	Ankrd33b	Ankrd33b	protein_coding
chr20	3570001	3571001		23546	11175	ENSRNOG00000057125	+	0	1	0	1	1	7.03e-06	9.78e-05	-13.3247	1000	Ddr1	Gtf2h4	protein_coding
chr5	172424001	172425001		9250	0	ENSRNOG00000014226	-	1	0	1	1	0	1.69e-06	3.04e-05	-13.2796	1000	Plch2	Pex10	protein_coding
chr1	175443001	175444001		1634	-1089	ENSRNOG00000027030	+	0	0	1	0	0	0.00013817	0.00105488	-13.2585	1000	Adm	Adm	protein_coding
chr5	137403001	137404001		8305	-30009	ENSRNOG00000045872	-	0	0	0	0	1	0.000336144	0.00213307	-13.2207	1000	Tmem125	Tmem125	protein_coding
chr4	61378001	61379001		6554	-41010	ENSRNOG00000008775	+	0	0	0	0	0	1.35e-06	2.58e-05	-13.2092	1000	Lrguk	Lrguk	protein_coding
chr3	60206001	60207001		4920	-39989	ENSRNOG00000018406	-	0	0	0	0	0	0.000147575	0.00110647	-13.2077	1000	Wipf1	Wipf1	protein_coding
chr19	26026001	26027001		22979	3153	ENSRNOG00000023830	+	0	0	0	1	0	1.37e-05	0.000166015	-13.18	1000	Dnase2	Dnase2	protein_coding
chr19	20178001	20179001		22853	30965	ENSRNOG00000014658	+	0	0	0	0	1	4.05e-07	9.45e-06	-13.1516	1000	Zfp423	Zfp423	protein_coding
chr14	105193001	105194001		19660	-51215	ENSRNOG00000054531	-	0	0	0	0	0	0.000245172	0.0016547	-13.1208	1000	AABR07016578.2	Lgalsl	lincRNA
chr15	106554001	106555001		20419	119825	ENSRNOG00000011203	+	0	0	0	0	1	0.000209672	0.00146087	-13.0798	1000	Farp1	Farp1	protein_coding
chr1	15740001	15741001		116	-37174	ENSRNOG00000053505	+	0	0	0	1	1	6.09e-06	8.64e-05	-13.0313	1000	U6	Bclaf1	snRNA
chr3	10476001	10477001		4577	-43148	ENSRNOG00000062252	-	0	0	0	0	0	4.35e-05	0.000416123	-13.0303	1000	AABR07072853.5	Ass1	processed_transcript
chr18	63937001	63938001		22501	54392	ENSRNOG00000016879	+	0	0	0	0	1	0.000452007	0.00270129	-13.0139	1000	Ldlrad4	Ldlrad4	protein_coding
chr4	27851001	27852001		6372	-95899	ENSRNOG00000009163	-	0	0	0	0	1	1.03e-05	0.000132784	-12.9991	1000	Fam133b	Fam133b	protein_coding
chr12	936001	937001		17092	-6007	ENSRNOG00000001092	+	0	0	0	0	0	4.9e-05	0.000455304	-12.9979	1000	Kl	Kl	protein_coding
chr8	112035001	112036001		13167	37554	ENSRNOG00000041453	+	0	0	0	0	0	9.25e-05	0.000758974	-12.974	1000	AABR07071368.1	Bfsp2	miRNA
chr19	53937001	53938001		23306	-122623	ENSRNOG00000017489	+	0	0	0	0	0	5.52e-05	0.000499312	-12.9101	1000	Gse1	RGD1304884	protein_coding
chr7	143750001	143751001		12122	781	ENSRNOG00000010977	+	0	0	1	0	1	0.000309049	0.00199659	-12.8999	1000	Igfbp6	Igfbp6	protein_coding
chr17	76575001	76576001		21908	42391	ENSRNOG00000017882	+	0	0	0	0	1	2.35e-06	4e-05	-12.8692	1000	Camk1d	Camk1d	protein_coding
chr10	34222001	34223001		14870	-74	ENSRNOG00000031138	-	0	0	1	0	0	4.76e-06	6.97e-05	-12.8145	1000	Irgm	Irgm	protein_coding
chr12	25202001	25203001		17546	28867	ENSRNOG00000021611	+	0	0	0	1	1	2.14e-05	0.000236797	-12.8036	1000	Clip2	Clip2	protein_coding
chr5	165696001	165697001		9031	-27028	ENSRNOG00000013474	+	0	0	0	0	0	7.51e-07	1.61e-05	-12.6401	1000	Casz1	Pex14	protein_coding
chr1	84138001	84139001		740	6917	ENSRNOG00000020871	-	0	0	0	1	1	3.07e-06	4.96e-05	-12.6398	1000	Ltbp4	Ltbp4	protein_coding
chr9	71443001	71444001		14078	1740	ENSRNOG00000014678	-	0	1	0	1	0	1.48e-06	2.76e-05	-12.6282	1000	Fzd5	Fzd5	protein_coding
chr7	78847001	78848001		11314	0	ENSRNOG00000004298	-	1	0	1	1	1	7.55e-05	0.000640227	-12.6273	1000	Dpys	Dpys	protein_coding
chr3	164516001	164517001		5895	91487	ENSRNOG00000057347	+	0	0	0	0	0	0.000767403	0.00412324	-12.5793	1000	Cebpb	Cebpb	protein_coding
chr1	8513001	8514001		69	-46911	ENSRNOG00000011399	-	0	0	0	0	0	2.04e-05	0.000228884	-12.5714	1000	AABR07000292.1	Vta1	processed_pseudogene
chr16	79698001	79699001		21118	1993	ENSRNOG00000012333	-	0	1	0	1	0	3.76e-09	1.86e-07	-12.4995	1000	Kbtbd11	Kbtbd11	protein_coding
chr12	30534001	30535001		17595	8712	ENSRNOG00000000925	+	0	1	0	1	1	0.000714198	0.00389452	-12.4927	1000	Psph	Psph	protein_coding
chr10	55542001	55543001		15155	528	ENSRNOG00000004566	-	0	0	1	1	1	0.000101675	0.000825232	-12.4764	1000	Arhgef15	Arhgef15	protein_coding
chr20	29863001	29864001		24083	31688	ENSRNOG00000000571	+	0	0	0	1	1	0.00155495	0.00719727	-12.4541	1000	Psap	Psap	protein_coding
chr20	42912001	42913001		24176	51242	ENSRNOG00000046812	-	0	0	0	0	0	9.01e-05	0.000743642	-12.4343	1000	AABR07045321.2	Marcks	pseudogene
chr1	161658001	161659001		1468	177673	ENSRNOG00000011151	-	0	0	0	0	1	7.23e-05	0.000619525	-12.424	1000	Tenm4	Tenm4	protein_coding
chr1	232384001	232385001		2345	-38493	ENSRNOG00000058399	-	0	0	0	0	0	0.00129245	0.0062181	-12.3979	1000	AABR07006389.1	Psat1	lincRNA
chr13	107213001	107214001		18800	-17953	ENSRNOG00000003738	+	0	0	0	0	1	0.000580416	0.00330286	-12.3526	1000	Ush2a	Kctd3	protein_coding
chr4	16502001	16503001		6325	151812	ENSRNOG00000005726	-	0	0	0	1	1	9.19e-06	0.000121069	-12.3173	1000	Pclo	Cacna2d1	protein_coding
chr1	80128001	80129001		572	-6392	ENSRNOG00000016362	+	0	0	0	0	0	0.00106082	0.00532424	-12.3134	1000	Gpr4	Gpr4	protein_coding
chr14	84457001	84458001		19513	-7516	ENSRNOG00000024390	+	0	0	0	0	0	0.000141404	0.00107336	-12.2935	1000	Osm	Osm	protein_coding
chr9	60625001	60626001		13993	46247	ENSRNOG00000013257	-	0	0	0	0	1	0.00146309	0.00685354	-12.2637	1000	Hecw2	Hecw2	protein_coding
chr15	86455001	86456001		20321	211854	ENSRNOG00000060775	+	0	0	0	0	1	0.000488541	0.0028765	-12.1394	1000	Lmo7	Lmo7	protein_coding
chr19	55311001	55312001		23362	-10599	ENSRNOG00000051531	-	0	0	0	1	1	8.18e-05	0.000685784	-12.1042	1000	Ctu2	Ctu2	protein_coding
chr5	166665001	166666001		9063	29135	ENSRNOG00000023152	-	0	0	0	0	0	0.00121394	0.00589973	-12.0215	1000	Tmem201	Pik3cd	protein_coding
chr9	98877001	98878001		14332	-46135	ENSRNOG00000020355	+	0	0	0	0	0	4.86e-05	0.000452679	-11.9493	1000	Twist2	Twist2	protein_coding
chr4	157595001	157596001		7239	566	ENSRNOG00000021401	+	0	1	1	1	0	5.69e-11	5.33e-09	-11.9426	1000	Lpar5	Acrbp	protein_coding
chr6	98156001	98157001		9914	88	ENSRNOG00000009542	-	1	0	1	1	1	3.24e-05	0.000331624	-11.8765	1000	Kcnh5	Kcnh5	protein_coding
chr15	103872001	103873001		20391	54593	ENSRNOG00000010064	-	0	0	0	1	1	8.19e-06	0.000110384	-11.7902	1000	Abcc4	Abcc4	protein_coding
chr8	65932001	65933001		12770	0	ENSRNOG00000062271	+	0	0	1	1	1	3.4e-05	0.000344069	-11.7599	1000	AABR07070329.1	LOC691000	lincRNA
chr3	171149001	171150001		6024	-14347	ENSRNOG00000046120	-	0	0	0	0	1	0.00088124	0.00458539	-11.7308	1000	Uchl3	Uchl3	protein_coding
chrX	11647001	11648001		24361	-990	ENSRNOG00000034240	+	0	0	1	0	0	0.000696709	0.00381505	-11.7112	1000	Bcor	Bcor	protein_coding
chr5	60998001	60999001		7836	-42059	ENSRNOG00000050061	-	0	0	0	0	1	1.24e-05	0.000154028	-11.6989	1000	Slc25a51	Mcart1	protein_coding
chr7	11247001	11248001		10579	1127	ENSRNOG00000020593	+	0	0	0	1	1	0.00154508	0.00715934	-11.6662	1000	Gipc3	Gipc3	protein_coding
chr14	79444001	79445001		19393	472	ENSRNOG00000006575	-	0	0	1	1	0	0.000138593	0.00105758	-11.626	1000	Ccdc96	Tada2b	protein_coding
chr2	30629001	30630001		3049	3858	ENSRNOG00000052167	-	1	0	0	1	1	0.000116287	0.00091596	-11.5915	1000	Marveld2	Marveld2	protein_coding
chr13	105408001	105409001		18785	0	ENSRNOG00000002501	+	1	0	1	1	0	2.34e-12	3.62e-10	-11.5095	1000	Ddx3y	Ddx3y	protein_coding
chr7	11240001	11241001		10576	1358	ENSRNOG00000020601	+	0	0	1	1	1	2.54e-09	1.36e-07	-11.5078	1000	Hmg20b	Hmg20b	protein_coding
chr6	109065001	109066001		10066	21122	ENSRNOG00000006467	+	0	0	0	0	1	7.45e-05	0.000634119	-11.4681	1000	Eif2b2	Eif2b2	protein_coding
chr3	1841001	1842001		4331	26016	ENSRNOG00000004560	-	0	0	0	1	1	2.46e-16	1.56e-13	-11.4672	1000	Cacna1b	Cacna1b	protein_coding
chr10	16089001	16090001		14751	-42969	ENSRNOG00000033169	-	0	0	0	0	0	0.000329084	0.00209526	-11.4591	1000	Cpeb4	Cpeb4	protein_coding
chr15	12831001	12832001		19844	3295	ENSRNOG00000009206	+	0	1	0	1	0	6.55e-05	0.000572165	-11.4392	1000	Fezf2	Fezf2	protein_coding
chr8	128633001	128634001		13427	10574	ENSRNOG00000034089	+	0	0	0	1	1	0.000219046	0.00151184	-11.4238	1000	Ttc21a	Gorasp1	protein_coding
chr17	19668001	19669001		21537	34682	ENSRNOG00000017579	-	0	0	0	0	0	0.000459642	0.00274023	-11.4175	1000	Mylip	Mylip	protein_coding
chr2	161564001	161565001		3587	0	ENSRNOG00000060947	+	0	0	1	1	0	2.21e-09	1.22e-07	-11.4043	1000	5_8S_rRNA	Shox2	rRNA
chr20	9233001	9234001		23810	15821	ENSRNOG00000000540	-	0	0	0	0	1	0.00142308	0.00671384	-11.3861	1000	Btbd9	Btbd9	protein_coding
chr3	9629001	9630001		4546	6059	ENSRNOG00000018486	-	0	1	0	1	0	0.000200219	0.0014099	-11.3799	1000	RGD1311084	RGD1311084	protein_coding
chr19	34013001	34014001		23035	5154	ENSRNOG00000055381	-	0	0	0	0	0	0.000427766	0.0025871	-11.3376	1000	AABR07043652.1	Tmem184c	lincRNA
chr7	138468001	138469001		11917	14613	ENSRNOG00000006653	-	0	0	0	0	1	0.00144556	0.00678737	-11.3319	1000	Slc38a4	Slc38a4	protein_coding
chr11	72587001	72588001		16868	-11684	ENSRNOG00000036044	-	0	0	0	1	1	0.000158405	0.00117381	-11.3286	1000	5S_rRNA	Bdh1	rRNA
chr9	82540001	82541001		14168	-15574	ENSRNOG00000019810	+	0	0	0	0	0	0.00202897	0.00884891	-11.2803	1000	Des	Des	protein_coding
chr6	137244001	137245001		10396	817	ENSRNOG00000037562	+	0	1	1	1	0	5.31e-05	0.000485035	-11.1837	1000	Zbtb42	Zbtb42	protein_coding
chr7	11691001	11692001		10627	7437	ENSRNOG00000032429	-	0	0	0	1	1	0.000258605	0.00172872	-11.1649	1000	Tmprss9	Tmprss9	protein_coding
chr18	72460001	72461001		22564	-89220	ENSRNOG00000018140	+	0	1	0	1	0	3.98e-06	6.06e-05	-11.1607	1000	Smad2	Smad2	protein_coding
chr16	84499001	84500001		21200	33346	ENSRNOG00000033703	+	0	0	0	0	0	0.000841007	0.00444261	-11.1282	1000	LOC689713	LOC689713	protein_coding
chr7	125243001	125244001		11726	-44082	ENSRNOG00000052064	+	0	0	0	0	1	0.0022623	0.00968414	-11.0965	1000	Parvg	Parvg	protein_coding
chr20	31507001	31508001		24114	89831	ENSRNOG00000000552	-	0	0	0	1	1	0.000550415	0.00316443	-11.0427	1000	Col13a1	Col13a1	protein_coding
chr10	100222001	100223001		16143	-187517	ENSRNOG00000053652	+	0	0	0	0	0	0.00108774	0.00542598	-11.007	1000	AABR07030699.1	Kcnj2	lincRNA
chr10	70119001	70120001		15488	752	ENSRNOG00000007578	+	0	1	1	1	0	0.000134905	0.00103456	-10.9778	1000	Zfp830	Zfp830	protein_coding
chr18	30808001	30809001		22268	0	ENSRNOG00000039463	+	0	0	1	1	0	7.25e-05	0.000620387	-10.977	1000	Pcdhga1	Pcdhga1	protein_coding
chr1	169391001	169392001		1571	-4063	ENSRNOG00000017143	-	0	0	1	0	0	0.000206113	0.00144017	-10.9517	1000	Olr150	Olr150	protein_coding
chr7	65043001	65044001		11161	37211	ENSRNOG00000004316	+	0	0	0	0	0	9.54e-06	0.000124943	-10.8847	1000	Llph	Llph	protein_coding
chr10	109826001	109827001		16485	144	ENSRNOG00000036681	-	1	1	1	1	0	0.00157319	0.00725588	-10.8816	1000	Myadml2	Myadml2	protein_coding
chr3	22056001	22057001		4717	7877	ENSRNOG00000061392	+	0	0	0	1	1	0.000313707	0.00201381	-10.8505	1000	U6	Icam5	snRNA
chr14	85721001	85722001		19542	-31761	ENSRNOG00000010298	+	0	0	0	0	0	0.000528929	0.00306379	-10.8019	1000	Xbp1	Xbp1	protein_coding
chr10	85392001	85393001		15763	7121	ENSRNOG00000022771	+	0	0	0	1	1	0.000694392	0.00380856	-10.7788	1000	Arhgap23	Srcin1	protein_coding
chr1	72400001	72401001		449	845	ENSRNOG00000016608	+	1	0	1	1	1	3.53e-06	5.51e-05	-10.7707	1000	Zfp579	Zfp579	protein_coding
chr10	18052001	18053001		14788	10392	ENSRNOG00000048389	-	0	0	0	0	1	6.21e-09	2.78e-07	-10.76	1000	Fgf18	Fgf18	protein_coding
chr1	101330001	101331001		1075	5350	ENSRNOG00000020719	+	0	0	0	1	1	0.000203589	0.00142894	-10.7548	1000	Hrc	Hrc	protein_coding
chr3	66419001	66420001		4996	-1261	ENSRNOG00000005609	-	0	0	1	0	1	2.9e-05	0.000302418	-10.7463	1000	Neurod1	Neurod1	protein_coding
chr13	111565001	111566001		18863	15019	ENSRNOG00000060773	-	0	0	0	0	0	1.26e-06	2.43e-05	-10.7393	1000	Sertad4	Sertad4	protein_coding
chr14	107751001	107752001		19687	840	ENSRNOG00000009639	+	0	1	1	1	1	0.00148678	0.00694743	-10.7297	1000	Zrsr1	Zrsr1	protein_coding
chr2	189854001	189855001		3795	1091	ENSRNOG00000014684	-	0	0	1	1	1	0.000230289	0.0015713	-10.7107	1000	Npr1	Npr1	protein_coding
chr12	25169001	25170001		17543	-3006	ENSRNOG00000021611	+	0	0	1	0	0	1.21e-06	2.35e-05	-10.6908	1000	Clip2	Clip2	protein_coding
chr17	90756001	90757001		22022	0	ENSRNOG00000002609	-	1	0	1	1	0	5e-10	3.41e-08	-10.6781	1000	Ero1b	Ero1b	protein_coding
chr2	124403001	124404001		3440	2313	ENSRNOG00000025371	+	1	0	0	1	1	0.000364661	0.00226621	-10.6217	1000	Spry1	Spry1	protein_coding
chr6	22138001	22139001		9460	0	ENSRNOG00000005610	-	1	0	1	1	1	2.57e-22	7.33e-19	-10.6026	1000	Yipf4	Yipf4	protein_coding
chr6	132356001	132357001		10285	-26338	ENSRNOG00000043143	+	0	0	0	0	0	0.00178014	0.00799162	-10.5735	1000	Eml1	Eml1	protein_coding
chr18	31338001	31339001		22299	4798	ENSRNOG00000060410	-	0	0	0	1	0	0.000188961	0.00134961	-10.5474	1000	Pcdh1	Dele1	protein_coding
chr1	51947001	51948001		318	-106794	ENSRNOG00000049044	-	0	0	0	0	0	0.000926399	0.00475683	-10.5432	1000	AABR07001561.1	Pabpc6	miRNA
chr5	169541001	169542001		9173	12689	ENSRNOG00000047760	+	0	0	0	1	1	2.87e-05	0.000299982	-10.5191	1000	AC135674.1	Chd5	miRNA
chr4	55689001	55690001		6478	23621	ENSRNOG00000007792	-	0	0	0	0	0	0.00066869	0.00369359	-10.4394	1000	Gcc1	Arf5	protein_coding
chr20	4485001	4486001		23592	646	ENSRNOG00000033581	+	0	0	1	1	1	0.000480679	0.00284095	-10.4206	1000	AABR07044388.2	Tnxa-ps1	processed_transcript
chr1	90064001	90065001		897	-6079	ENSRNOG00000021119	-	0	0	0	1	1	0.00159455	0.00733109	-10.36	1000	Pdcd2l	Pdcd2l	protein_coding
chr19	55389001	55390001		23367	0	ENSRNOG00000014405	-	0	1	1	1	1	2.12e-13	4.85e-11	-10.3412	1000	Aprt	Aprt	protein_coding
chr15	5129001	5130001		19801	13119	ENSRNOG00000058309	-	0	0	0	0	0	1.64e-08	6.4e-07	-10.3258	1000	AABR07016934.1	Cd99l2	lincRNA
chr10	11131001	11132001		14561	0	ENSRNOG00000004141	-	1	0	1	1	1	0.00180102	0.00804723	-10.3222	1000	Vasn	Vasn	protein_coding
chr5	60976001	60977001		7835	-20059	ENSRNOG00000050061	-	0	0	0	0	1	0.00165135	0.00752963	-10.3135	1000	Slc25a51	Mcart1	protein_coding
chr6	74911001	74912001		9759	-1210	ENSRNOG00000046049	+	0	0	1	0	0	1.06e-06	2.11e-05	-10.3111	1000	AABR07064304.1	Egln3	pseudogene
chr5	140979001	140980001		8376	0	ENSRNOG00000015642	+	1	0	1	1	1	4.99e-07	1.13e-05	-10.3	1000	Pabpc4	Pabpc4	protein_coding
chr5	155255001	155256001		8790	2393	ENSRNOG00000012804	-	0	1	1	1	1	2.2e-05	0.000242362	-10.276	1000	C1qc	C1qc	protein_coding
chr5	165036001	165037001		9008	46488	ENSRNOG00000026447	-	0	0	0	0	0	1.1e-05	0.000139899	-10.2692	1000	Disp3	Fbxo2	protein_coding
chr1	81971001	81972001		689	18935	ENSRNOG00000055761	+	0	0	0	1	1	7.64e-07	1.63e-05	-10.257	1000	Zfp574	Zfp574	protein_coding
chr2	94100001	94101001		3291	-79496	ENSRNOG00000055998	+	0	0	0	0	0	0.000571488	0.00325855	-10.2303	1000	U1	Fabp5	snRNA
chr10	83358001	83359001		15678	-25151	ENSRNOG00000005185	-	0	0	0	0	0	0.00114347	0.0056416	-10.2134	1000	Nxph3	Nxph3	protein_coding
chr3	14913001	14914001		4684	23492	ENSRNOG00000055226	+	0	0	0	0	1	2.66e-06	4.41e-05	-10.206	1000	Dab2ip	Dab2ip	protein_coding
chr1	243587001	243588001		2412	-1608	ENSRNOG00000016284	+	0	0	1	0	0	0.000867789	0.00453882	-10.1878	1000	Dmrt3	Dmrt3	protein_coding
chr17	9090001	9091001		21340	-18732	ENSRNOG00000011984	+	0	0	0	0	0	1.71e-07	4.59e-06	-10.1168	1000	Cxcl14	Cxcl14	protein_coding
chr1	212622001	212623001		1960	0	ENSRNOG00000018927	-	0	0	1	1	0	2.67e-11	2.86e-09	-10.1133	1000	Sprn	Sprn	protein_coding
chr2	183312001	183313001		3662	31177	ENSRNOG00000056769	-	0	0	0	0	0	0.000259955	0.00173639	-10.0637	1000	AABR07012040.1	Trim2	lincRNA
chr9	100797001	100798001		14361	-17287	ENSRNOG00000018181	-	0	0	0	0	0	0.000648382	0.00360056	-10.0396	1000	Stk25	Stk25	protein_coding
chr7	14217001	14218001		10801	0	ENSRNOG00000027319	-	1	0	1	1	1	1.51e-07	4.14e-06	-10.0087	1000	Ephx3	Ephx3	protein_coding
chr3	172385001	172386001		6054	0	ENSRNOG00000047374	+	1	0	1	1	1	0.00222327	0.00953612	-9.9326	1000	Gnas	Gnas	protein_coding
chr1	190554001	190555001		1714	-178	ENSRNOG00000036742	+	0	0	1	0	0	8.77e-14	2.24e-11	-9.92159	1000	Uqcrc2	Uqcrc2	protein_coding
chr10	17050001	17051001		14775	24140	ENSRNOG00000027606	-	0	0	0	1	1	1.18e-05	0.000147856	-9.881	1000	Neurl1b	Neurl1b	protein_coding
chr1	84141001	84142001		742	3917	ENSRNOG00000020871	-	0	0	0	1	1	0.000429133	0.00259444	-9.87374	1000	Ltbp4	Ltbp4	protein_coding
chr1	234669001	234670001		2354	114	ENSRNOG00000025644	-	0	0	1	1	1	1.89e-14	6.47e-12	-9.84074	1000	LOC499331	LOC499331	protein_coding
chr6	105739001	105740001		10011	94034	ENSRNOG00000053831	-	0	0	0	1	1	0.00167485	0.00761883	-9.76658	1000	AABR07065049.2	Pcnx1	lincRNA
chr1	250299001	250300001		2462	953	ENSRNOG00000052057	-	0	0	1	0	0	0.00153113	0.00710428	-9.7561	1000	AABR07006727.1	Prkg1	pseudogene
chr1	72559001	72560001		461	13406	ENSRNOG00000016877	+	0	0	0	1	1	0.00230898	0.00983905	-9.74604	1000	Shisa7	Shisa7	protein_coding
chr3	165894001	165895001		5942	-66602	ENSRNOG00000061341	+	0	0	0	0	0	0.00091318	0.00471579	-9.7321	1000	LOC108350528	Zfp64	lincRNA
chr1	79998001	79999001		562	-1166	ENSRNOG00000060146	+	0	1	1	1	1	0.00188719	0.00836329	-9.71719	1000	Six5	Fbxo46	protein_coding
chr18	28067001	28068001		22206	-49077	ENSRNOG00000047085	-	0	1	0	1	1	0.00126753	0.00612321	-9.69122	1000	Lrrtm2	Lrrtm2	protein_coding
chr1	220677001	220678001		2137	8458	ENSRNOG00000028743	+	0	1	0	1	0	2.39e-06	4.06e-05	-9.65985	1000	Gal3st3	Gal3st3	protein_coding
chr3	140424001	140425001		5507	-140381	ENSRNOG00000036964	+	0	0	0	0	0	0.000137805	0.00105303	-9.62571	1000	Ralgapa2	Crnkl1	protein_coding
chr20	5453001	5454001		23651	1633	ENSRNOG00000031171	-	0	0	1	1	1	1.71e-05	0.000199038	-9.60189	1000	Wdr46	Wdr46	protein_coding
chr4	177530001	177531001		7390	127098	ENSRNOG00000014856	+	0	0	0	0	0	0.00114507	0.00564787	-9.58904	1000	Etnk1	Etnk1	protein_coding
chr17	19581001	19582001		21535	-73	ENSRNOG00000017250	-	0	0	1	0	0	8.17e-08	2.47e-06	-9.57478	1000	Gmpr	Gmpr	protein_coding
chr5	16841001	16842001		7545	-3632	ENSRNOG00000031769	+	0	0	1	0	0	0.00042103	0.00255128	-9.55988	1000	Chchd7	Plag1	protein_coding
chr19	42041001	42042001		23145	12019	ENSRNOG00000052310	-	0	0	0	0	1	4.88e-06	7.14e-05	-9.55847	1000	Pkd1l3	Dhodh	protein_coding
chr14	77709001	77710001		19367	-2241	ENSRNOG00000006876	+	0	0	1	0	0	0.000211103	0.00146845	-9.50976	1000	Msx1	Msx1	protein_coding
chr3	174298001	174299001		6082	-167484	ENSRNOG00000060485	+	0	0	0	0	0	0.00161508	0.00740004	-9.5053	1000	AABR07054945.1	Cdh26	miRNA
chr8	116764001	116765001		13239	0	ENSRNOG00000019363	-	1	1	1	1	1	0.000196165	0.0013882	-9.50146	1000	Inka1	Inka1	protein_coding
chr6	137671001	137672001		10412	-6869	ENSRNOG00000013914	-	0	0	0	0	0	1.24e-05	0.000154028	-9.49824	1000	Gpr132	Gpr132	protein_coding
chr3	8408001	8409001		4489	575	ENSRNOG00000035452	+	0	0	1	0	0	0.000357408	0.00223354	-9.49271	1000	Mir2964	Mir219-2	miRNA
chr7	12270001	12271001		10694	3804	ENSRNOG00000033791	-	0	0	0	1	1	0.000268695	0.00178711	-9.45272	1000	Apc2	Apc2	protein_coding
chr17	43961001	43962001		21715	14872	ENSRNOG00000017585	+	0	0	0	0	0	2.28e-05	0.000249802	-9.40218	1000	Abt1	Abt1	protein_coding
chr2	93518001	93519001		3286	0	ENSRNOG00000009953	+	1	0	1	1	1	1.46e-05	0.000173965	-9.40171	1000	Snx16	Snx16	protein_coding
chr10	85921001	85922001		15792	16086	ENSRNOG00000021536	-	0	0	0	0	1	0.000117061	0.000921213	-9.38214	1000	Plxdc1	Plxdc1	protein_coding
chr2	251530001	251531001		4242	1313	ENSRNOG00000014350	-	0	1	1	1	1	1.29e-05	0.000158931	-9.37472	1000	Ccn1	Ccn1	protein_coding
chr10	93577001	93578001		16045	56870	ENSRNOG00000006548	+	0	0	0	1	1	0.000438229	0.0026355	-9.32298	1000	Mrc2	Mrc2	protein_coding
chr1	33914001	33915001		223	3090	ENSRNOG00000033609	+	0	0	0	1	1	6.75e-05	0.000585529	-9.31184	1000	Irx1	Irx1	protein_coding
chr5	160703001	160704001		8965	38480	ENSRNOG00000014322	-	0	0	0	0	1	0.000604987	0.00341659	-9.28681	1000	Kazn	Tmem51	protein_coding
chr5	36686001	36687001		7656	-2646	ENSRNOG00000006908	-	0	0	1	0	0	4.25e-05	0.000408209	-9.26925	1000	Pou3f2	Pou3f2	protein_coding
chr5	148257001	148258001		8565	0	ENSRNOG00000031475	+	1	0	1	1	1	0.000256758	0.0017204	-9.26049	1000	Col16a1	Col16a1	protein_coding
chrX	25627001	25628001		24409	273	ENSRNOG00000003613	-	1	0	1	1	1	2.07e-05	0.000231281	-9.25926	1000	Mid1	Mid1	protein_coding
chr6	104407001	104408001		9993	1006	ENSRNOG00000033973	-	0	0	0	1	0	7.68e-11	6.85e-09	-9.24519	1000	Ccdc177	Plekhd1	protein_coding
chr1	626001	627001		1	-72414	ENSRNOG00000047964	+	0	0	0	0	0	1.24e-08	5.02e-07	-9.23258	1000	AABR07000089.1	Vom2r5	protein_coding
chr20	4445001	4446001		23590	-7391	ENSRNOG00000000443	+	0	0	0	0	1	5.24e-07	1.18e-05	-9.2115	1000	LOC103689965	Atf6b	protein_coding
chr14	84246001	84247001		19503	8482	ENSRNOG00000042041	+	0	0	0	1	0	2.1e-08	7.8e-07	-9.20026	1000	Gal3st1	Gal3st1	protein_coding
chr17	5634001	5635001		21275	-20982	ENSRNOG00000054793	+	0	0	0	0	0	5.26e-06	7.6e-05	-9.17585	1000	AABR07026936.3	Agtpbp1	lincRNA
chr18	17697001	17698001		22148	18881	ENSRNOG00000014503	-	0	0	0	0	0	0.00231229	0.00984652	-9.17217	1000	Celf4	RGD1562608	protein_coding
chr17	11101001	11102001		21425	0	ENSRNOG00000023688	+	1	0	1	1	0	0.000859727	0.00451595	-9.16085	1000	Drd1	Drd1	protein_coding
chr2	199461001	199462001		3908	17310	ENSRNOG00000030747	-	0	0	0	0	0	0.00184416	0.00820788	-9.11797	1000	LOC685963	Rpl38	protein_coding
chr10	16635001	16636001		14764	0	ENSRNOG00000020747	+	1	0	1	1	0	3.15e-06	5.04e-05	-9.10823	1000	Nkx2-5	Nkx2-5	protein_coding
chr4	57459001	57460001		6521	3472	ENSRNOG00000035624	-	0	0	0	0	0	6.72e-07	1.46e-05	-9.05468	1000	Mir96	Mir182	miRNA
chr5	156068001	156069001		8813	36868	ENSRNOG00000013954	-	0	0	0	1	1	1.42e-05	0.000171078	-9.03775	1000	Alpl	Rap1gap	protein_coding
chr10	109412001	109413001		16444	-7187	ENSRNOG00000058777	+	0	0	0	0	0	2.35e-05	0.000255461	-9.03221	1000	AABR07030919.1	Actg1	lincRNA
chr10	96020001	96021001		16098	-4503	ENSRNOG00000003262	-	0	0	1	0	0	0.000447434	0.00267863	-9.03045	1000	Cacng4	Cacng4	protein_coding
chr2	142235001	142236001		3509	0	ENSRNOG00000013660	-	1	0	1	1	0	4.75e-14	1.43e-11	-9.01873	1000	Cog6	Cog6	protein_coding
chr13	53090001	53091001		18387	-3771	ENSRNOG00000025987	-	0	0	1	1	1	0.00121243	0.00589621	-8.99555	1000	LOC498236	LOC498236	protein_coding
chr1	105094001	105095001		1171	0	ENSRNOG00000022189	+	1	0	1	1	1	0.000746209	0.00403577	-8.95113	1000	Htatip2	Htatip2	protein_coding
chr6	134532001	134533001		10311	93179	ENSRNOG00000048809	-	0	0	0	0	0	0.000161965	0.00119518	-8.94057	1000	Mir1247	Mir1247	miRNA
chr6	86650001	86651001		9821	-197	ENSRNOG00000023230	+	0	0	1	0	0	1.26e-09	7.52e-08	-8.9172	1000	RGD1307621	RGD1307621	protein_coding
chr2	138834001	138835001		3478	-69	ENSRNOG00000009949	-	0	0	1	0	0	0.000149007	0.00111624	-8.90835	1000	Pcdh18	Pcdh18	protein_coding
chr2	144847001	144848001		3529	-13456	ENSRNOG00000032922	+	0	0	0	0	1	0.00185271	0.00823309	-8.87147	1000	Dclk1	Dclk1	protein_coding
chr1	243370001	243371001		2407	-4982	ENSRNOG00000016023	+	0	0	1	0	1	3.98e-08	1.34e-06	-8.82766	1000	Kank1	Kank1	protein_coding
chr5	9370001	9371001		7511	10215	ENSRNOG00000021663	-	0	0	0	1	1	0.00200185	0.00875687	-8.80035	1000	Vxn	Vxn	protein_coding
chr6	135112001	135113001		10326	0	ENSRNOG00000059714	-	1	0	1	1	1	2.29e-15	1.09e-12	-8.79096	1000	Hsp90aa1	Hsp90aa1	protein_coding
chr10	91782001	91783001		16008	14318	ENSRNOG00000003807	-	0	0	0	0	0	0.000921269	0.00474613	-8.78017	1000	Wnt9b	Wnt9b	protein_coding
chr15	58712001	58713001		20260	-130	ENSRNOG00000038228	-	0	0	1	0	0	1.58e-16	1.08e-13	-8.77698	1000	Serp2	Serp2	protein_coding
chr6	137986001	137987001		10433	-10336	ENSRNOG00000005174	+	0	0	0	0	0	0.000644417	0.00358377	-8.76169	1000	Tmem121	Crip1	protein_coding
chr8	61274001	61275001		12694	15241	ENSRNOG00000017193	-	0	1	0	1	0	0.000546384	0.00314681	-8.64834	1000	Lingo1	Lingo1	protein_coding
chr3	169848001	169849001		5986	-116420	ENSRNOG00000052782	+	0	0	0	0	0	0.000749975	0.00405173	-8.64757	1000	AABR07054809.1	Cbln4	lincRNA
chr10	90701001	90702001		15968	7933	ENSRNOG00000059149	-	0	0	0	1	1	0.00159618	0.0073366	-8.62857	1000	AABR07030498.1	Adam11	lincRNA
chr15	105724001	105725001		20409	83905	ENSRNOG00000010737	+	0	0	0	0	1	0.000841088	0.00444261	-8.62806	1000	Mbnl2	Mbnl2	protein_coding
chr10	101503001	101504001		16153	192339	ENSRNOG00000036251	-	0	0	0	0	0	0.0012056	0.00587537	-8.57417	1000	Mir297	Mir297	miRNA
chr2	22881001	22882001		2940	-12893	ENSRNOG00000052958	-	0	0	0	0	0	0.00201356	0.00879702	-8.56909	1000	AABR07007663.1	Homer1	lincRNA
chr18	40134001	40135001		22341	0	ENSRNOG00000016612	-	1	0	1	1	1	2.28e-07	5.78e-06	-8.55214	1000	Trim36	Trim36	protein_coding
chr17	44065001	44066001		21718	39735	ENSRNOG00000017318	+	0	0	0	0	0	0.000110856	0.000880061	-8.45066	1000	Zfp322a	Zfp322a	protein_coding
chr1	85486001	85487001		803	713	ENSRNOG00000019338	+	0	0	1	1	1	5.76e-09	2.61e-07	-8.44852	1000	Dll3	Dll3	protein_coding
chr12	16057001	16058001		17335	26214	ENSRNOG00000001241	+	0	0	0	0	1	0.00036952	0.00228811	-8.44493	1000	Iqce	Ttyh3	protein_coding
chr11	38274001	38275001		16691	0	ENSRNOG00000001618	-	1	0	1	1	1	9.45e-06	0.00012386	-8.44444	1000	Ripk4	Ripk4	protein_coding
chr14	28074001	28075001		19134	-139	ENSRNOG00000036377	+	0	0	1	0	0	0.000714383	0.00389452	-8.42837	1000	AABR07014722.1	Adgrl3	miRNA
chr7	141053001	141054001		12021	0	ENSRNOG00000055579	+	1	0	1	1	1	0.00115487	0.00569128	-8.4226	1000	Tmbim6	Tmbim6	protein_coding
chr13	70208001	70209001		18449	10855	ENSRNOG00000062032	+	0	0	0	0	0	0.00190869	0.00843593	-8.36974	1000	AABR07021401.1	Ncf2	unprocessed_pseudogene
chr17	25882001	25883001		21592	-195070	ENSRNOG00000057915	-	0	0	0	0	0	0.00166847	0.00759816	-8.36551	1000	U4	Eef1e1	snRNA
chr5	57229001	57230001		7730	-9087	ENSRNOG00000008252	+	0	0	0	0	0	4.47e-10	3.1e-08	-8.32753	1000	Spink4	Spink4	protein_coding
chr5	140656001	140657001		8362	746	ENSRNOG00000014008	-	0	0	1	0	1	7.5e-05	0.00063782	-8.30822	1000	Mfsd2a	Mfsd2a	protein_coding
chr12	5822001	5823001		17150	0	ENSRNOG00000000894	-	1	0	1	1	1	3.82e-08	1.3e-06	-8.26045	1000	Fry	Fry	protein_coding
chr10	28688001	28689001		14831	-61293	ENSRNOG00000003781	+	0	0	0	0	1	6.85e-05	0.000593034	-8.24297	1000	Atp10b	Mir146a	protein_coding
chr10	109190001	109191001		16434	-4235	ENSRNOG00000004392	+	0	0	1	1	1	0.000173803	0.0012671	-8.2023	1000	Aatk	Mir3065	protein_coding
chrX	62903001	62904001		24492	0	ENSRNOG00000012513	-	1	0	1	1	1	1.54e-11	1.77e-09	-8.17741	1000	Pdk3	Pdk3	protein_coding
chr20	5795001	5796001		23681	2622	ENSRNOG00000038807	+	0	0	1	0	0	0.0014436	0.00678075	-8.16993	1000	Clpsl2	Clpsl2	protein_coding
chr16	81545001	81546001		21146	6514	ENSRNOG00000050993	+	0	0	0	0	0	4.32e-12	6.07e-10	-8.16804	1000	AABR07026534.1	Upf3a	processed_pseudogene
chr18	73958001	73959001		22585	22875	ENSRNOG00000054472	-	0	0	0	0	0	9.5e-15	3.88e-12	-8.11449	1000	AABR07032621.1	Rnf165	lincRNA
chrX	68627001	68628001		24510	0	ENSRNOG00000006642	+	1	0	1	1	1	1.58e-10	1.28e-08	-8.09699	1000	Yipf6	Yipf6	protein_coding
chr3	3951001	3952001		4415	0	ENSRNOG00000019322	-	1	0	1	1	0	0.000270641	0.00179587	-8.09465	1000	Notch1	Notch1	protein_coding
chr2	2891001	2892001		2872	0	ENSRNOG00000026937	-	1	0	1	1	0	3.01e-13	6.3e-11	-8.08871	1000	Arsk	Arsk	protein_coding
chr14	60503001	60504001		19298	0	ENSRNOG00000004130	-	1	0	1	1	1	8.09e-06	0.000109481	-8.08532	1000	Anapc4	Anapc4	protein_coding
chr17	14826001	14827001		21470	1330	ENSRNOG00000016915	-	0	0	0	1	1	4.1e-05	0.000398276	-8.06122	1000	Barx1	Barx1	protein_coding
chr16	55131001	55132001		20942	192	ENSRNOG00000012767	-	0	0	1	1	1	2.71e-06	4.48e-05	-8.03064	1000	Micu3	Micu3	protein_coding
chr10	105290001	105291001		16288	-6148	ENSRNOG00000046001	-	0	0	0	0	0	7.83e-07	1.66e-05	-8.00818	1000	AABR07030823.1	Foxj1	pseudogene
chr1	221802001	221803001		2208	478	ENSRNOG00000021103	+	0	0	1	1	1	1.42e-06	2.67e-05	-8.00397	1000	Nrxn2	Nrxn2	protein_coding
chr4	430001	431001		6172	-7669	ENSRNOG00000006846	+	0	0	0	0	0	3.81e-05	0.000375685	-7.99825	1000	En2	En2	protein_coding
chrX	145876001	145877001		24694	-55	ENSRNOG00000054106	-	0	0	1	0	0	8.6e-06	0.000114279	-7.99636	1000	5_8S_rRNA	Magec2	rRNA
chr16	19918001	19919001		20659	0	ENSRNOG00000017676	-	1	0	1	1	1	0.000573535	0.00326913	-7.962	1000	Plvap	Plvap	protein_coding
chr5	79367001	79368001		7971	0	ENSRNOG00000008163	+	1	0	1	1	1	7.2e-13	1.33e-10	-7.95029	1000	Atp6v1g1	Atp6v1g1	protein_coding
chr7	58474001	58475001		11091	54805	ENSRNOG00000053060	+	0	0	0	0	1	0.00138857	0.0065818	-7.91942	1000	Zfc3h1	Lgr5	protein_coding
chr1	84183001	84184001		751	-14928	ENSRNOG00000020882	-	0	0	0	1	1	0.000794163	0.00424175	-7.90254	1000	Shkbp1	Shkbp1	protein_coding
chr1	85112001	85113001		781	0	ENSRNOG00000019254	+	1	1	1	1	1	7.15e-10	4.58e-08	-7.87879	1000	Dyrk1b	Dyrk1b	protein_coding
chr16	20412001	20413001		20704	-3433	ENSRNOG00000019228	+	0	0	1	1	1	7.75e-05	0.00065431	-7.86458	1000	Pik3r2	Pik3r2	protein_coding
chr9	16639001	16640001		13678	3183	ENSRNOG00000017857	-	0	0	0	1	1	9.59e-07	1.96e-05	-7.86422	1000	LOC108348250	Mrpl2	protein_coding
chr19	23406001	23407001		22888	16627	ENSRNOG00000013907	+	0	0	0	0	0	0.000103489	0.0008359	-7.86422	1000	Sall1	Sall1	protein_coding
chr15	34338001	34339001		20033	0	ENSRNOG00000019840	-	1	0	1	1	1	4.61e-05	0.00043487	-7.84635	1000	Mdp1	Mdp1	protein_coding
chr12	50189001	50190001		18075	23401	ENSRNOG00000025612	-	0	0	0	1	1	0.000318226	0.00203672	-7.7654	1000	Sez6l	Asphd2	protein_coding
chrX	15699001	15700001		24385	-5529	ENSRNOG00000022417	-	0	0	0	1	1	0.000662259	0.00366752	-7.76224	1000	Prickle3	Prickle3	protein_coding
chr8	39898001	39899001		12469	8479	ENSRNOG00000030016	-	0	0	0	1	1	0.000530343	0.00306783	-7.74531	1000	Robo3	Robo3	protein_coding
chr3	146981001	146982001		5560	0	ENSRNOG00000008604	+	1	0	1	1	1	5.18e-13	1.02e-10	-7.73914	1000	Nsfl1c	Nsfl1c	protein_coding
chr4	50314001	50315001		6463	-1394	ENSRNOG00000007608	-	0	0	1	0	0	0.000528803	0.00306379	-7.73759	1000	Fezf1	Fezf1	protein_coding
chr2	179842001	179843001		3643	0	ENSRNOG00000010199	-	1	0	1	1	1	1.15e-12	1.92e-10	-7.71937	1000	Glrb	Glrb	protein_coding
chr3	120106001	120107001		5360	0	ENSRNOG00000014710	-	1	0	1	1	1	0.00143365	0.00675066	-7.69277	1000	Prom2	Prom2	protein_coding
chr16	90662001	90663001		21224	48132	ENSRNOG00000053026	+	0	0	0	0	0	0.000113214	0.000895461	-7.68301	1000	Shcbp1	Slc10a2	protein_coding
chr13	111043001	111044001		18860	122172	ENSRNOG00000003841	+	0	0	0	0	1	0.00069831	0.00382027	-7.66367	1000	Kcnh1	Kcnh1	protein_coding
chr7	142720001	142721001		12082	-23655	ENSRNOG00000032026	-	0	0	0	0	0	1.95e-05	0.000220701	-7.65143	1000	AABR07058914.1	Acvrl1	pseudogene
chr11	29963001	29964001		16583	87104	ENSRNOG00000021569	-	0	0	0	0	1	0.000460702	0.00274468	-7.64263	1000	Tiam1	Tiam1	protein_coding
chr12	44405001	44406001		17905	-23713	ENSRNOG00000001130	-	0	0	0	0	1	2.84e-05	0.000297442	-7.61888	1000	Nos1	Nos1	protein_coding
chr7	72773001	72774001		11246	562	ENSRNOG00000006870	+	0	0	1	1	1	2.2e-11	2.41e-09	-7.557	1000	Mtdh	Mtdh	protein_coding
chr1	273694001	273695001		2733	63248	ENSRNOG00000012084	-	0	0	0	0	0	0.000574919	0.00327484	-7.53873	1000	Xpnpep1	Xpnpep1	protein_coding
chr6	906001	907001		9310	-73274	ENSRNOG00000004577	+	0	0	0	1	1	0.000421071	0.00255128	-7.53338	1000	Fez2	Fez2	protein_coding
chr6	110071001	110072001		10086	-21820	ENSRNOG00000010227	+	0	0	0	0	0	2.66e-05	0.000282806	-7.52894	1000	Gpatch2l	Gpatch2l	protein_coding
chr8	68962001	68963001		12807	3109	ENSRNOG00000009173	-	0	0	0	0	1	0.000854378	0.0044975	-7.51004	1000	Smad6	Smad6	protein_coding
chr6	8736001	8737001		9378	66280	ENSRNOG00000030629	+	0	0	0	0	0	0.00152338	0.00707984	-7.50397	1000	Camkmt	Six3	protein_coding
chr14	38128001	38129001		19196	0	ENSRNOG00000025882	-	1	0	1	1	0	9.38e-05	0.000768064	-7.46801	1000	Nipal1	Nipal1	protein_coding
chr9	65917001	65918001		14031	0	ENSRNOG00000024085	-	1	1	1	1	0	7.65e-13	1.38e-10	-7.4549	1000	Tmem237	Tmem237	protein_coding
chr5	95426001	95427001		7992	0	ENSRNOG00000051725	-	0	0	1	1	1	2.11e-06	3.65e-05	-7.42574	1000	AABR07048878.1	Tyrp1	lincRNA
chr7	126460001	126461001		11759	659	ENSRNOG00000015750	-	0	0	1	0	1	0.000243826	0.00164987	-7.40778	1000	Wnt7b	Wnt7b	protein_coding
chr7	3354001	3355001		10541	-117	ENSRNOG00000007905	+	0	0	1	0	0	0.000192316	0.00136888	-7.40221	1000	Itga7	Itga7	protein_coding
chr8	128741001	128742001		13432	12515	ENSRNOG00000018509	-	0	0	0	1	0	3.93e-06	5.99e-05	-7.36855	1000	Cx3cr1	Cx3cr1	protein_coding
chr5	141639001	141640001		8390	66466	ENSRNOG00000017426	+	0	0	0	0	0	3.18e-05	0.000326949	-7.35178	1000	Rragc	Rragc	protein_coding
chr4	67616001	67617001		6608	-5292	ENSRNOG00000026528	-	0	0	0	0	0	1.9e-11	2.12e-09	-7.34509	1000	Mrps33	Mrps33	protein_coding
chr20	20320001	20321001		23993	-23923	ENSRNOG00000053288	+	0	0	0	0	1	1.59e-06	2.92e-05	-7.34142	1000	Ank3	Ank3	protein_coding
chr7	120749001	120750001		11606	0	ENSRNOG00000013577	+	0	0	1	1	1	3.69e-09	1.84e-07	-7.3385	1000	Kdelr3	Kdelr3	protein_coding
chr13	72368001	72369001		18470	-22	ENSRNOG00000002863	-	0	0	1	0	0	5.4e-08	1.74e-06	-7.31169	1000	Cacna1e	Cacna1e	protein_coding
chr2	142884001	142885001		3515	605	ENSRNOG00000021670	-	0	0	1	1	0	2.28e-07	5.78e-06	-7.30525	1000	Frem2	Frem2	protein_coding
chr10	85641001	85642001		15779	-4100	ENSRNOG00000012705	-	0	0	1	0	0	0.000130747	0.00100938	-7.30201	1000	Pcgf2	Pcgf2	protein_coding
chr7	24717001	24718001		10870	-1737	ENSRNOG00000057870	-	0	0	1	0	0	0.000154548	0.00114962	-7.2821	1000	AABR07056423.1	Tmem263	lincRNA
chr16	46926001	46927001		20888	-130359	ENSRNOG00000056304	+	0	0	0	1	0	2.65e-05	0.000281889	-7.27077	1000	AABR07025709.1	Dctd	snoRNA
chr14	1463001	1464001		18883	0	ENSRNOG00000049782	+	1	0	1	1	1	0.00113254	0.00560506	-7.26996	1000	Csf2ra	Csf2ra	protein_coding
chr16	4204001	4205001		20498	-234103	ENSRNOG00000058571	+	0	0	0	0	0	0.00198141	0.00868569	-7.26259	1000	AABR07024542.1	Wnt5a	lincRNA
chrX	145875001	145876001		24693	0	ENSRNOG00000054106	-	0	0	1	1	0	1.74e-11	1.98e-09	-7.22639	1000	5_8S_rRNA	Magec2	rRNA
chr17	15749001	15750001		21479	0	ENSRNOG00000016225	+	1	0	1	1	0	0.000149632	0.00111994	-7.18272	1000	Fgd3	Fgd3	protein_coding
chr13	47565001	47566001		18272	-6220	ENSRNOG00000004405	+	0	0	0	0	0	0.00205218	0.00893567	-7.16255	1000	Pigr	Pigr	protein_coding
chr14	10395001	10396001		19009	0	ENSRNOG00000002159	-	1	0	1	1	0	1.61e-14	5.74e-12	-7.15688	1000	Gpat3	Gpat3	protein_coding
chr6	89291001	89292001		9827	317548	ENSRNOG00000053107	+	0	0	0	0	0	0.000451445	0.00269887	-7.15165	1000	AABR07064650.1	Mdga2	snoRNA
chr20	4395001	4396001		23582	488	ENSRNOG00000000433	+	0	1	1	1	1	8.23e-05	0.000689453	-7.11032	1000	Prrt1	Prrt1	protein_coding
chr9	10470001	10471001		13567	10	ENSRNOG00000050543	-	0	0	1	1	1	2.95e-09	1.52e-07	-7.10056	1000	Safb	Safb	protein_coding
chrX	82278001	82279001		24568	60859	ENSRNOG00000056740	+	0	0	0	0	1	0.00195491	0.00860915	-7.09989	1000	Cylc1	Tug1	protein_coding
chr15	18695001	18696001		19861	0	ENSRNOG00000008167	-	1	0	1	1	1	0.000126121	0.000981244	-7.09794	1000	Abhd6	Abhd6	protein_coding
chr4	2340001	2341001		6190	0	ENSRNOG00000048969	+	0	0	1	1	1	1.52e-15	7.67e-13	-7.08519	1000	AABR07059041.1	Mnx1	protein_coding
chr7	141307001	141308001		12031	0	ENSRNOG00000049033	-	1	0	1	1	1	1.51e-14	5.49e-12	-7.07987	1000	Racgap1	Racgap1	protein_coding
chr5	172218001	172219001		9241	-40521	ENSRNOG00000024526	+	0	0	0	0	0	0.000203328	0.00142887	-7.07518	1000	Ttc34	Mmel1	protein_coding
chr10	98097001	98098001		16130	26744	ENSRNOG00000024233	-	0	0	0	1	1	0.00168122	0.00763494	-7.01474	1000	RGD1559578	RGD1559578	protein_coding
chr8	22929001	22930001		12352	0	ENSRNOG00000011582	-	1	0	1	1	1	2.46e-08	8.86e-07	-6.98889	1000	Rab3d	Rab3d	protein_coding
chr10	50399001	50400001		15108	2617	ENSRNOG00000003384	-	0	0	0	0	1	0.000908116	0.0046953	-6.96941	1000	Hs3st3b1	Hs3st3b1	protein_coding
chr18	25069001	25070001		22171	-14049	ENSRNOG00000059935	+	0	0	0	0	0	0.000298938	0.00194376	-6.95558	1000	7SK	Ercc3	misc_RNA
chr14	3767001	3768001		18925	-24042	ENSRNOG00000059950	+	0	0	0	0	0	5.85e-07	1.3e-05	-6.93002	1000	AABR07014158.1	Cdc7	lincRNA
chr7	117587001	117588001		11521	0	ENSRNOG00000025594	-	1	0	1	1	0	3.29e-10	2.39e-08	-6.91862	1000	Scrt1	Scrt1	protein_coding
chr20	12381001	12382001		23907	-15329	ENSRNOG00000057037	-	0	0	0	0	0	0.00130249	0.00625221	-6.90542	1000	AABR07044596.1	Slc19a1	pseudogene
chr1	280234001	280235001		2813	-73	ENSRNOG00000018350	-	0	0	1	0	0	4.16e-08	1.39e-06	-6.90154	1000	Shtn1	Shtn1	protein_coding
chr8	48421001	48422001		12528	-37	ENSRNOG00000006663	+	0	0	1	0	1	1.15e-10	9.6e-09	-6.89084	1000	Usp2	Usp2	protein_coding
chr1	92945001	92946001		952	18448	ENSRNOG00000060688	+	0	0	0	0	0	0.00123577	0.00599177	-6.86125	1000	AABR07003007.1	Tshz3	lincRNA
chr5	143063001	143064001		8422	0	ENSRNOG00000024889	+	1	0	1	1	1	1.27e-10	1.05e-08	-6.85863	1000	Snip1	Snip1	protein_coding
chr3	171667001	171668001		6038	69761	ENSRNOG00000028533	+	0	0	0	0	0	3.38e-06	5.32e-05	-6.84017	1000	LOC689618	LOC689618	protein_coding
chr1	167044001	167045001		1558	-6210	ENSRNOG00000000417	+	0	0	0	0	0	1.75e-07	4.66e-06	-6.83762	1000	Numa1	Numa1	protein_coding
chr11	68309001	68310001		16809	39239	ENSRNOG00000002238	-	0	0	0	1	1	3.25e-05	0.000331868	-6.83283	1000	Sema5b	Slc49a4	protein_coding
chr16	6712001	6713001		20519	0	ENSRNOG00000021805	+	1	0	1	1	1	5.45e-12	7.29e-10	-6.78738	1000	Rft1	Rft1	protein_coding
chr7	140893001	140894001		12015	-10419	ENSRNOG00000057315	+	0	0	0	0	1	0.000145774	0.00109777	-6.76408	1000	Kcnh3	Mcrs1	protein_coding
chr5	155857001	155858001		8807	-22370	ENSRNOG00000021437	+	0	0	0	1	1	0.000638929	0.00356597	-6.76319	1000	AABR07073181.1	LOC690206	protein_coding
chr3	137991001	137992001		5486	-21344	ENSRNOG00000005707	-	0	0	0	0	0	0.00160822	0.00737611	-6.73677	1000	Bfsp1	Bfsp1	protein_coding
chr7	129832001	129833001		11813	-9148	ENSRNOG00000053803	+	0	0	0	0	0	1.03e-06	2.07e-05	-6.71877	1000	AABR07058656.1	Creld2	lincRNA
chr11	32656001	32657001		16642	349	ENSRNOG00000026870	+	0	0	1	1	1	7.37e-05	0.000629318	-6.6542	1000	Clic6	Clic6	protein_coding
chr3	3797001	3798001		4407	178	ENSRNOG00000018791	-	0	1	1	1	1	1.97e-08	7.37e-07	-6.64008	1000	Dnlz	Dnlz	protein_coding
chr6	104408001	104409001		9994	6	ENSRNOG00000033973	-	0	0	1	1	0	0.000903883	0.00467624	-6.63818	1000	Ccdc177	Plekhd1	protein_coding
chr10	75528001	75529001		15587	-10	ENSRNOG00000010363	+	0	0	1	0	0	2.92e-10	2.18e-08	-6.63629	1000	Mrps23	Mrps23	protein_coding
chr8	70113001	70114001		12824	77	ENSRNOG00000010634	+	0	0	1	1	1	2.27e-07	5.78e-06	-6.63069	1000	Megf11	Rab11a	protein_coding
chrX	42559001	42560001		24465	71	ENSRNOG00000003675	+	1	0	1	1	1	9.97e-07	2.02e-05	-6.61696	1000	Ptchd1	Ptchd1	protein_coding
chr10	109427001	109428001		16452	6816	ENSRNOG00000058777	+	0	0	0	0	0	2.86e-05	0.000299306	-6.6106	1000	AABR07030919.1	Actg1	lincRNA
chr8	123648001	123649001		13367	180750	ENSRNOG00000054937	-	0	0	0	0	0	0.000702998	0.00384223	-6.59573	1000	AABR07071598.1	Stt3b	protein_coding
chr3	95954001	95955001		5173	0	ENSRNOG00000004787	-	0	0	1	1	1	1.02e-11	1.29e-09	-6.55051	1000	AABR07053185.1	Elp4	protein_coding
chr2	45503001	45504001		3134	14503	ENSRNOG00000010992	-	0	0	0	0	0	0.000922406	0.00474721	-6.53999	1000	Hspb3	Hspb3	protein_coding
chr1	36112001	36113001		231	0	ENSRNOG00000017150	-	1	0	1	1	1	6.3e-06	8.89e-05	-6.53951	1000	Med10	Med10	protein_coding
chr14	78641001	78642001		19383	382	ENSRNOG00000005108	+	0	0	1	0	1	0.000670233	0.00369973	-6.52219	1000	Wfs1	Wfs1	protein_coding
chr16	20577001	20578001		20722	-132	ENSRNOG00000019698	+	0	0	1	0	0	0.00120208	0.00586265	-6.5208	1000	Ssbp4	Ssbp4	protein_coding
chr10	13077001	13078001		14612	-1138	ENSRNOG00000003721	-	0	1	1	1	1	0.000104034	0.00083951	-6.51143	1000	Paqr4	Paqr4	protein_coding
chr18	62176001	62177001		22477	1332	ENSRNOG00000018770	+	0	0	0	1	1	0.0017007	0.00770621	-6.49512	1000	Pmaip1	Pmaip1	protein_coding
chr3	8981001	8982001		4514	0	ENSRNOG00000018145	-	0	0	1	1	1	2.97e-09	1.53e-07	-6.4932	1000	Crat	Crat	protein_coding
chr3	43114001	43115001		4777	2338	ENSRNOG00000005600	-	0	0	0	1	1	0.000716778	0.00390506	-6.48942	1000	Nr4a2	Nr4a2	protein_coding
chrX	156230001	156231001		24720	2172	ENSRNOG00000060839	+	0	0	1	0	0	0.000226264	0.00154939	-6.48272	1000	LOC690348	Olr1768	protein_coding
chr10	50405001	50406001		15114	-2386	ENSRNOG00000003384	-	0	0	1	0	0	7.63e-07	1.63e-05	-6.47533	1000	Hs3st3b1	Hs3st3b1	protein_coding
chr16	21288001	21289001		20792	0	ENSRNOG00000020622	+	0	0	1	1	1	0.0001401	0.00106597	-6.47487	1000	Cilp2	Cilp2	protein_coding
chr14	71852001	71853001		19340	0	ENSRNOG00000005261	+	1	0	1	1	1	6.15e-15	2.7e-12	-6.46525	1000	Fbxl5	Fbxl5	protein_coding
chr1	40286001	40287001		247	-30295	ENSRNOG00000053056	-	0	0	0	0	0	3.8e-13	7.76e-11	-6.4591	1000	AABR07001358.1	Plekhg1	lincRNA
chr1	81293001	81294001		652	1443	ENSRNOG00000024257	-	1	0	0	1	1	0.00212312	0.00919169	-6.42124	1000	Irgc	Irgc	protein_coding
chr8	68024001	68025001		12793	0	ENSRNOG00000057119	+	0	0	1	1	0	3.63e-06	5.62e-05	-6.40646	1000	U6	Pias1	snRNA
chr2	211261001	211262001		4033	-25535	ENSRNOG00000020255	-	0	0	0	1	1	0.00108137	0.00540167	-6.40121	1000	Sars1	Sars	protein_coding
chr5	144160001	144161001		8437	0	ENSRNOG00000024818	+	1	0	1	1	1	1.11e-11	1.36e-09	-6.37668	1000	Eva1b	Eva1b	protein_coding
chr8	45066001	45067001		12491	4332	ENSRNOG00000024438	+	0	0	0	0	0	0.000300357	0.00195002	-6.36624	1000	Bsx	Bsx	protein_coding
chr1	266782001	266783001		2702	0	ENSRNOG00000020248	-	1	0	1	1	1	9.54e-07	1.96e-05	-6.35561	1000	Ina	Ina	protein_coding
chr1	6968001	6969001		42	1041	ENSRNOG00000011058	-	0	0	0	0	1	0.00177091	0.00796443	-6.35057	1000	Utrn	Utrn	protein_coding
chr10	15748001	15749001		14743	0	ENSRNOG00000054307	-	0	0	1	1	0	2.66e-05	0.000282806	-6.34954	1000	Metazoa_SRP	Il9r	misc_RNA
chr3	142204001	142205001		5532	62279	ENSRNOG00000045370	+	0	0	0	0	0	8.66e-05	0.000719876	-6.34259	1000	AABR07054120.1	Foxa2	miRNA
chr2	187546001	187547001		3702	33838	ENSRNOG00000031778	+	0	0	0	0	0	1.57e-07	4.27e-06	-6.33703	1000	Mef2d	Mef2d	protein_coding
chr1	220009001	220010001		2116	0	ENSRNOG00000061795	+	1	0	1	1	1	6.94e-14	1.95e-11	-6.33166	1000	Rbm4b	Rbm4b	protein_coding
chr10	83678001	83679001		15689	22542	ENSRNOG00000006108	+	0	0	0	0	0	0.00204693	0.00892041	-6.31363	1000	Gngt2	Gngt2	protein_coding
chr4	58893001	58894001		6546	0	ENSRNOG00000012495	-	1	0	1	1	0	1.21e-07	3.45e-06	-6.29592	1000	Podxl	Podxl	protein_coding
chr9	10949001	10950001		13593	-2375	ENSRNOG00000049918	+	0	0	1	1	1	8.74e-05	0.000724222	-6.27994	1000	Lrg1	Lrg1	protein_coding
chr9	88357001	88358001		14223	0	ENSRNOG00000014851	-	1	0	1	1	1	4.13e-07	9.59e-06	-6.27904	1000	Col4a4	Col4a3	protein_coding
chr14	51462001	51463001		19278	0	ENSRNOG00000011096	-	1	0	1	1	1	3.84e-06	5.9e-05	-6.27191	1000	Hmgb3	Hmgb3	protein_coding
chr7	99482001	99483001		11381	0	ENSRNOG00000056796	+	0	0	1	1	0	4.18e-06	6.33e-05	-6.26952	1000	5_8S_rRNA	Sqle	rRNA
chr7	75300001	75301001		11272	-11637	ENSRNOG00000025504	-	0	0	0	0	0	8.47e-09	3.61e-07	-6.26031	1000	Ankrd46	Ankrd46	protein_coding
chr5	73985001	73986001		7916	374	ENSRNOG00000026271	-	0	0	1	1	1	5.89e-07	1.3e-05	-6.24992	1000	Tmem245	Mir32	protein_coding
chr20	5036001	5037001		23623	23	ENSRNOG00000000857	-	1	0	1	1	1	2.53e-06	4.24e-05	-6.2401	1000	Msh5	Msh5	protein_coding
chr14	44767001	44768001		19241	0	ENSRNOG00000002932	-	1	0	1	1	1	0.00203876	0.00888706	-6.1756	1000	Wdr19	Wdr19	protein_coding
chr8	75518001	75519001		12893	1098	ENSRNOG00000027145	+	0	0	0	0	1	0.00197026	0.0086545	-6.16552	1000	Rora	Ice2	protein_coding
chr17	31535001	31536001		21646	0	ENSRNOG00000017577	-	1	0	1	1	1	1.18e-10	9.82e-09	-6.16249	1000	Bphl	Bphl	protein_coding
chr2	210378001	210379001		4015	-2830	ENSRNOG00000018290	+	0	0	1	0	0	1.73e-05	0.000201333	-6.13187	1000	Alx3	Alx3	protein_coding
chr1	102368001	102369001		1137	-27539	ENSRNOG00000011306	+	0	0	0	0	0	1.03e-07	3.03e-06	-6.10472	1000	Myod1	Myod1	protein_coding
chr1	161185001	161186001		1465	-35247	ENSRNOG00000040447	+	0	0	0	0	0	2.72e-08	9.65e-07	-6.08054	1000	Mir708	Mir708	miRNA
chr18	62965001	62966001		22483	0	ENSRNOG00000018648	-	1	0	1	1	1	1.48e-12	2.41e-10	-6.06345	1000	Mppe1	Mppe1	protein_coding
chr7	24893001	24894001		10877	-7227	ENSRNOG00000007587	-	0	0	0	0	0	2.28e-08	8.36e-07	-6.04459	1000	Tcp11l2	Tcp11l2	protein_coding
chr7	123287001	123288001		11680	0	ENSRNOG00000006762	-	1	0	1	1	1	2.73e-07	6.74e-06	-6.04182	1000	Snu13	Snu13	protein_coding
chr7	130430001	130431001		11841	-214	ENSRNOG00000032828	+	0	0	1	0	0	6.38e-07	1.4e-05	-6.04011	1000	Mapk8ip2	Arsa	protein_coding
chr8	118176001	118177001		13292	5560	ENSRNOG00000029194	-	0	0	0	0	1	4.85e-10	3.33e-08	-6.03878	1000	Dhx30	Dhx30	protein_coding
chr4	180632001	180633001		7422	89359	ENSRNOG00000001804	-	0	0	0	1	1	0.000210912	0.00146772	-6.03299	1000	Itpr2	Itpr2	protein_coding
chr9	93734001	93735001		14263	637	ENSRNOG00000018931	-	0	1	1	1	1	1.04e-05	0.000134107	-5.99783	1000	Dis3l2	Nppc	protein_coding
chr4	119841001	119842001		6938	-14	ENSRNOG00000010474	+	0	0	1	0	1	5.12e-10	3.48e-08	-5.9873	1000	Hmces	Hmces	protein_coding
chrX	37469001	37470001		24451	0	ENSRNOG00000006632	+	1	0	1	1	0	1.21e-05	0.00015157	-5.98053	1000	Rps6ka3	Rps6ka3	protein_coding
chr3	8803001	8804001		4507	150	ENSRNOG00000025296	+	0	0	1	0	1	2.31e-16	1.52e-13	-5.97677	1000	Lrrc8a	Lrrc8a	protein_coding
chr14	4371001	4372001		18943	8285	ENSRNOG00000002117	+	0	0	0	0	0	0.00137247	0.0065181	-5.96998	1000	Barhl2	Barhl2	protein_coding
chr1	263131001	263132001		2559	-54236	ENSRNOG00000016302	+	0	0	0	0	0	0.000860056	0.00451629	-5.96585	1000	Cnnm1	Hpse2	protein_coding
chr19	25346001	25347001		22938	-212	ENSRNOG00000007582	-	0	0	1	0	0	9.94e-07	2.02e-05	-5.93524	1000	Zswim4	Zswim4	protein_coding
chr7	12840001	12841001		10769	0	ENSRNOG00000024879	+	1	0	1	1	0	3.41e-16	2.09e-13	-5.92054	1000	Polrmt	Polrmt	protein_coding
chr10	49541001	49542001		15105	0	ENSRNOG00000003338	+	1	0	1	1	1	1.61e-05	0.000189986	-5.91892	1000	Pmp22	Pmp22	protein_coding
chr1	174619001	174620001		1621	65	ENSRNOG00000010752	-	1	0	1	1	1	0.000105667	0.000849493	-5.91133	1000	Tmem41b	Tmem41b	protein_coding
chr12	24775001	24776001		17531	0	ENSRNOG00000046700	-	0	0	1	1	1	0.00227997	0.00974278	-5.90782	1000	Mettl27	Mettl27	protein_coding
chr15	27875001	27876001		19933	0	ENSRNOG00000009982	+	1	0	1	1	1	4.52e-08	1.49e-06	-5.90649	1000	Pnp	Pnp	protein_coding
chr1	85275001	85276001		784	22899	ENSRNOG00000056251	+	0	0	0	0	0	0.000269811	0.00179314	-5.90277	1000	Ifnl1	Lrfn1	protein_coding
chr17	90802001	90803001		22023	0	ENSRNOG00000002624	+	1	0	1	1	1	0.000373991	0.00231023	-5.90096	1000	Edaradd	Ero1b	protein_coding
chr18	31489001	31490001		22306	-1331	ENSRNOG00000047213	-	0	0	1	0	0	4.84e-09	2.29e-07	-5.8959	1000	Gnpda1	Gnpda1	protein_coding
chr4	62438001	62439001		6562	0	ENSRNOG00000010421	-	1	0	1	1	1	0.00011961	0.000938685	-5.89506	1000	Wdr91	Wdr91	protein_coding
chr1	221084001	221085001		2169	0	ENSRNOG00000056038	-	0	0	1	1	1	0.000680368	0.00374137	-5.89227	1000	Ehbp1l1	Ehbp1l1	protein_coding
chr7	21203001	21204001		10840	734	ENSRNOG00000058241	-	0	0	1	1	1	0.00130262	0.00625221	-5.88268	1000	AABR07056200.1	Vom2r56	lincRNA
chr5	151504001	151505001		8643	-30252	ENSRNOG00000008564	-	0	0	0	1	1	0.000589447	0.00334647	-5.87981	1000	Tmem222	Tmem222	protein_coding
chr5	133902001	133903001		8218	5861	ENSRNOG00000008161	+	0	0	0	0	0	4.09e-05	0.000398227	-5.87094	1000	Pdzk1ip1	Pdzk1ip1	protein_coding
chr10	103815001	103816001		16215	288	ENSRNOG00000003280	-	1	0	1	1	1	0.00178899	0.00801018	-5.86512	1000	Grin2c	Grin2c	protein_coding
chr1	156282001	156283001		1453	-129	ENSRNOG00000022748	+	0	0	1	0	0	1.8e-05	0.000208253	-5.86265	1000	Tmem126a	Tmem126a	protein_coding
chr14	86738001	86739001		19567	336	ENSRNOG00000056150	-	0	1	1	1	0	3.71e-10	2.64e-08	-5.85018	1000	Purb	Purb	protein_coding
chr6	25616001	25617001		9487	0	ENSRNOG00000052357	-	0	0	1	1	1	1.37e-07	3.82e-06	-5.83404	1000	Fosl2	Fosl2	protein_coding
chr10	62700001	62701001		15363	-279	ENSRNOG00000014496	-	0	0	1	0	0	0.000433643	0.00261618	-5.82082	1000	Coro6	Coro6	protein_coding
chr8	22054001	22055001		12308	-3352	ENSRNOG00000041899	-	0	0	1	1	1	0.000590382	0.00335067	-5.81582	1000	AC135310.2	Icam5	miRNA
chr1	173284001	173285001		1595	8666	ENSRNOG00000052236	+	0	0	0	1	1	0.000103171	0.000834629	-5.81134	1000	AABR07004992.1	Olr203	protein_coding
chr7	12871001	12872001		10775	2216	ENSRNOG00000008831	-	0	0	0	0	1	0.00083303	0.0044124	-5.8056	1000	Hcn2	Hcn2	protein_coding
chr13	84619001	84620001		18565	0	ENSRNOG00000032058	-	1	0	1	1	0	8.77e-10	5.43e-08	-5.80311	1000	Pogk	Pogk	protein_coding
chrX	156227001	156228001		24717	0	ENSRNOG00000060839	+	0	0	1	1	0	2.5e-10	1.89e-08	-5.78691	1000	LOC690348	Olr1768	protein_coding
chr11	68197001	68198001		16806	0	ENSRNOG00000002241	-	1	0	1	1	1	7.58e-07	1.62e-05	-5.78093	1000	Hspbap1	Hspbap1	protein_coding
chr13	88536001	88537001		18589	0	ENSRNOG00000002941	-	1	0	1	1	1	5.86e-06	8.38e-05	-5.77252	1000	Uhmk1	Uhmk1	protein_coding
chr2	2236001	2237001		2864	202794	ENSRNOG00000057296	+	0	0	0	0	0	6.04e-05	0.000535131	-5.76752	1000	AC112001.1	Glrx	pseudogene
chr1	84146001	84147001		745	-86	ENSRNOG00000020871	-	0	0	1	0	1	0.00234977	0.00996647	-5.76208	1000	Ltbp4	Ltbp4	protein_coding
chr1	82006001	82007001		690	-1464	ENSRNOG00000055650	-	0	0	1	0	0	0.000381893	0.00235283	-5.75887	1000	Pou2f2	Luc7l3	protein_coding
chr9	71444001	71445001		14079	740	ENSRNOG00000014678	-	0	0	1	1	0	0.000134268	0.00103092	-5.75188	1000	Fzd5	Fzd5	protein_coding
chr1	51619001	51620001		316	0	ENSRNOG00000017367	+	1	0	1	1	0	0.00201579	0.00880263	-5.74193	1000	Pabpc6	Pabpc6	protein_coding
chr14	2297001	2298001		18897	0	ENSRNOG00000000062	-	1	0	1	1	1	3.61e-09	1.81e-07	-5.74034	1000	Pcgf3	Pcgf3	protein_coding
chr3	499001	500001		4327	-27368	ENSRNOG00000005070	-	0	0	0	0	0	3.53e-05	0.000354515	-5.73295	1000	Spopl	Spopl	protein_coding
chr14	17064001	17065001		19084	0	ENSRNOG00000002225	+	1	0	1	1	1	3.33e-08	1.15e-06	-5.73039	1000	Scarb2	Scarb2	protein_coding
chrX	74484001	74485001		24540	-12263	ENSRNOG00000002923	+	0	0	0	0	0	8.72e-05	0.000723173	-5.72174	1000	Zcchc13	Ftx	protein_coding
chr20	3591001	3592001		23548	2505	ENSRNOG00000000833	+	0	0	0	1	1	0.000197068	0.00139344	-5.71078	1000	Vars2	Vars2	protein_coding
chr8	103483001	103484001		13076	23841	ENSRNOG00000046848	+	0	0	0	1	1	0.00077218	0.00414112	-5.69389	1000	PCOLCE2	PCOLCE2	protein_coding
chr16	69239001	69240001		21025	2029	ENSRNOG00000014199	-	0	1	0	1	0	9e-05	0.000743642	-5.65569	1000	Zfp703	Zfp703	protein_coding
chr15	42653001	42654001		20117	0	ENSRNOG00000016460	+	1	0	1	1	1	1.05e-06	2.1e-05	-5.65414	1000	Clu	Scara3	protein_coding
chr18	17698001	17699001		22149	17881	ENSRNOG00000014503	-	0	0	0	1	1	0.000155873	0.00115805	-5.65262	1000	Celf4	RGD1562608	protein_coding
chr1	125319001	125320001		1228	-47281	ENSRNOG00000016358	+	0	0	0	0	0	0.00159811	0.00734258	-5.6525	1000	Apba2	Apba2	protein_coding
chr7	125570001	125571001		11734	-5328	ENSRNOG00000012475	+	0	0	0	0	0	4.42e-12	6.1e-10	-5.64865	1000	Prr5	Prr5	protein_coding
chr5	127925001	127926001		8167	0	ENSRNOG00000010636	+	1	0	1	1	1	3.02e-07	7.37e-06	-5.64601	1000	Coa7	Coa7	protein_coding
chr6	3682001	3683001		9343	24677	ENSRNOG00000007907	+	0	0	0	0	1	0.00146093	0.00684526	-5.63628	1000	Tmem178a	Tmem178a	protein_coding
chrX	19271001	19272001		24397	821	ENSRNOG00000021434	+	1	0	1	1	0	1.25e-05	0.000155805	-5.62254	1000	Usp51	Usp51	protein_coding
chr7	144560001	144561001		12160	4279	ENSRNOG00000055918	-	0	0	1	0	1	0.000129879	0.00100456	-5.61603	1000	AABR07058934.2	Hoxc11	lincRNA
chr18	1539001	1540001		22049	34824	ENSRNOG00000031022	+	0	0	0	0	0	6.8e-10	4.38e-08	-5.60729	1000	LOC108348287	Rpl36al	protein_coding
chrX	40364001	40365001		24462	356	ENSRNOG00000007688	+	0	0	1	0	1	0.000652693	0.00362274	-5.59144	1000	Sms	Sms	protein_coding
chr16	47368001	47369001		20891	0	ENSRNOG00000013248	+	1	0	1	1	0	6.45e-08	2.04e-06	-5.58583	1000	Wwc2	Wwc2	protein_coding
chr10	13524001	13525001		14627	-8554	ENSRNOG00000006136	-	0	0	0	0	0	7.68e-06	0.000105714	-5.55549	1000	Pdpk1	Pdpk1	protein_coding
chr7	123990001	123991001		11705	0	ENSRNOG00000022896	-	1	1	1	1	1	1.29e-11	1.52e-09	-5.55056	1000	Rrp7a	Rrp7a	protein_coding
chr15	90175001	90176001		20345	0	ENSRNOG00000010058	-	1	0	1	1	1	0.00113563	0.00561423	-5.53431	1000	Spry2	Spry2	protein_coding
chr8	111979001	111980001		13166	4573	ENSRNOG00000010911	-	0	0	0	0	1	1.38e-05	0.00016725	-5.52668	1000	Tmem108	Bfsp2	protein_coding
chr13	45001001	45002001		18260	38594	ENSRNOG00000003681	-	0	0	0	1	1	0.00168158	0.00763494	-5.51935	1000	Lct	Lct	protein_coding
chr15	106844001	106845001		20423	0	ENSRNOG00000011598	-	1	0	1	1	1	0.00111023	0.00552359	-5.51476	1000	Slc15a1	Slc15a1	protein_coding
chr12	41663001	41664001		17821	7438	ENSRNOG00000001392	-	0	1	0	1	1	2.81e-07	6.93e-06	-5.51319	1000	Lhx5	Lhx5	protein_coding
chr18	63356001	63357001		22492	195	ENSRNOG00000025324	-	1	0	1	1	1	2.15e-06	3.71e-05	-5.47038	1000	Spire1	Spire1	protein_coding
chr14	106318001	106319001		19667	-69463	ENSRNOG00000008079	-	0	0	0	0	0	0.000312811	0.00200957	-5.44792	1000	Ugp2	Ugp2	protein_coding
chr6	1942001	1943001		9321	0	ENSRNOG00000032136	-	1	0	1	1	1	1.48e-14	5.49e-12	-5.43588	1000	Cdc42ep3	Cdc42ep3	protein_coding
chr6	35321001	35322001		9591	6558	ENSRNOG00000004210	+	0	1	0	1	0	1.72e-07	4.59e-06	-5.41357	1000	Osr1	Osr1	protein_coding
chr5	172259001	172260001		9242	0	ENSRNOG00000024526	+	0	0	1	1	1	1.03e-14	4.11e-12	-5.41322	1000	Ttc34	Mmel1	protein_coding
chr1	114453001	114454001		1196	0	ENSRNOG00000013718	+	1	0	1	1	1	1.34e-08	5.41e-07	-5.41256	1000	Herc2	Herc2	protein_coding
chr6	136705001	136706001		10370	0	ENSRNOG00000035489	-	0	0	1	1	0	3.11e-05	0.000321536	-5.40881	1000	Mir3545	Mir3545	miRNA
chr5	172306001	172307001		9244	432	ENSRNOG00000013468	-	0	0	1	1	1	0.000204496	0.00143296	-5.40088	1000	Prxl2b	Prxl2b	protein_coding
chr15	46613001	46614001		20169	0	ENSRNOG00000011316	+	1	0	1	1	1	2.04e-13	4.74e-11	-5.40018	1000	Fam167a	Fam167a	protein_coding
chr1	248229001	248230001		2458	506	ENSRNOG00000011308	+	0	0	1	0	1	1.77e-05	0.000205807	-5.39559	1000	Uhrf2	Uhrf2	protein_coding
chr1	247486001	247487001		2449	0	ENSRNOG00000060867	-	1	0	1	1	0	0.00201649	0.0088034	-5.3793	1000	Rln1	Rln1	protein_coding
chr10	69783001	69784001		15484	-19085	ENSRNOG00000052610	-	0	0	0	1	1	1.93e-05	0.000218233	-5.36969	1000	7SK	Tmem132e	misc_RNA
chr11	31390001	31391001		16609	488	ENSRNOG00000028658	+	1	0	1	1	1	0.000430975	0.00260191	-5.34791	1000	Olig2	Olig2	protein_coding
chr2	44869001	44870001		3128	5750	ENSRNOG00000039588	+	0	1	0	1	0	5.74e-05	0.00051601	-5.34768	1000	Mcidas	Ccno	protein_coding
chrX	34588001	34589001		24438	-34406	ENSRNOG00000030759	+	0	0	0	0	0	2.31e-05	0.000251577	-5.33324	1000	Nhs	Rai2	protein_coding
chr6	131837001	131838001		10258	76029	ENSRNOG00000005776	-	0	0	0	1	0	6.43e-10	4.18e-08	-5.33121	1000	Bcl11b	Bcl11b	protein_coding
chr20	44220001	44221001		24185	0	ENSRNOG00000024918	-	1	0	1	1	1	1.79e-06	3.17e-05	-5.33097	1000	Fam229b	Fam229b	protein_coding
chr8	81949001	81950001		12948	0	ENSRNOG00000023086	+	0	0	1	1	1	2.93e-19	3.58e-16	-5.29029	1000	LOC100360828	Arpp19	protein_coding
chr5	58163001	58164001		7762	0	ENSRNOG00000039530	-	1	0	1	1	1	4.14e-06	6.29e-05	-5.27847	1000	Ccl27	Ccl27	protein_coding
chr1	184105001	184106001		1668	201	ENSRNOG00000011367	-	0	0	1	1	1	0.000146905	0.00110387	-5.27465	1000	Cyp2r1	Cyp2r1	protein_coding
chr8	19049001	19050001		12267	-28624	ENSRNOG00000039919	-	0	0	0	0	0	0.000840211	0.00444203	-5.27354	1000	Olr1132	Olr1132	protein_coding
chr9	100080001	100081001		14346	0	ENSRNOG00000045775	+	0	0	1	1	1	0.000154226	0.00114781	-5.27098	1000	Rnpepl1	Rnpepl1	protein_coding
chr4	66090001	66091001		6583	0	ENSRNOG00000027617	+	1	0	1	1	1	2.82e-05	0.000295806	-5.26134	1000	Ttc26	Ttc26	protein_coding
chr10	17421001	17422001		14781	0	ENSRNOG00000004217	+	0	0	1	1	1	0.000675731	0.00372049	-5.25197	1000	Stk10	Stk10	protein_coding
chr10	76320001	76321001		15595	0	ENSRNOG00000000244	+	1	0	1	1	1	1.12e-06	2.21e-05	-5.25089	1000	Coil	Coil	protein_coding
chr3	142390001	142391001		5537	6724	ENSRNOG00000013133	+	0	0	0	0	0	0.000396286	0.00242667	-5.25063	1000	Foxa2	Foxa2	protein_coding
chr12	5823001	5824001		17151	-128	ENSRNOG00000000894	-	0	0	1	0	0	0.000820149	0.00435764	-5.24741	1000	Fry	Fry	protein_coding
chr5	130197001	130198001		8193	-88394	ENSRNOG00000033097	+	0	0	0	0	0	1.02e-05	0.000132188	-5.23879	1000	Agbl4	Agbl4	protein_coding
chr13	83916001	83917001		18550	0	ENSRNOG00000003283	-	1	0	1	1	1	8.44e-05	0.000703977	-5.2376	1000	Rcsd1	Rcsd1	protein_coding
chr20	5723001	5724001		23679	0	ENSRNOG00000025909	-	1	0	1	1	1	5.61e-05	0.000506032	-5.23246	1000	Uqcc2	Uqcc2	protein_coding
chr8	49106001	49107001		12566	0	ENSRNOG00000014218	-	1	1	1	1	1	3.08e-09	1.57e-07	-5.21088	1000	Tmem25	Tmem25	protein_coding
chr1	212530001	212531001		1957	-12851	ENSRNOG00000046776	-	0	0	0	0	0	5.77e-05	0.000518217	-5.20604	1000	Msx3	Msx3	protein_coding
chr3	170252001	170253001		5991	0	ENSRNOG00000004451	+	1	0	1	1	0	0.00163994	0.0074918	-5.20468	1000	Mc3r	Mc3r	protein_coding
chr13	88944001	88945001		18592	-410	ENSRNOG00000042929	-	0	0	1	0	0	9.26e-05	0.000759036	-5.20184	1000	LOC100361087	Nos1ap	protein_coding
chr10	105102001	105103001		16283	13917	ENSRNOG00000009343	-	0	0	0	1	0	0.00128248	0.00618327	-5.20166	1000	Evpl	Evpl	protein_coding
chr11	72137001	72138001		16864	19523	ENSRNOG00000001739	-	0	1	0	1	1	0.00200807	0.00877563	-5.19688	1000	Meltf	LOC102549772	protein_coding
chr5	63784001	63785001		7880	2201	ENSRNOG00000005964	+	0	0	0	0	1	1.14e-08	4.69e-07	-5.1928	1000	Nr4a3	Nr4a3	protein_coding
chr9	64096001	64097001		14016	0	ENSRNOG00000015983	-	1	0	1	1	1	0.000807799	0.00430194	-5.18387	1000	Maip1	Tyw5	protein_coding
chr9	42805001	42806001		13853	0	ENSRNOG00000014901	-	1	0	1	1	1	4.45e-12	6.1e-10	-5.17946	1000	Uggt1	Uggt1	protein_coding
chr12	2555001	2556001		17129	0	ENSRNOG00000001047	-	0	0	1	1	1	1.99e-12	3.16e-10	-5.16024	1000	Map2k7	Map2k7	protein_coding
chr3	6538001	6539001		4445	87285	ENSRNOG00000009342	-	0	0	0	0	1	0.000336314	0.00213337	-5.15591	1000	Fcnb	Fcnb	protein_coding
chr2	113067001	113068001		3348	117	ENSRNOG00000024119	+	0	0	1	1	1	9e-07	1.86e-05	-5.15429	1000	Ghsr	Ghsr	protein_coding
chr10	56524001	56525001		15228	0	ENSRNOG00000016360	+	1	1	1	1	1	1.37e-15	7.11e-13	-5.1497	1000	Gps2	Gps2	protein_coding
chr5	22799001	22800001		7581	0	ENSRNOG00000007445	-	1	0	1	1	1	0.00126455	0.00611054	-5.14706	1000	Asph	Gdf6	protein_coding
chr6	132672001	132673001		10288	-29449	ENSRNOG00000004339	+	0	0	0	0	0	3.35e-07	8e-06	-5.14041	1000	Yy1	Yy1	protein_coding
chr15	46382001	46383001		20160	-35	ENSRNOG00000010696	-	0	0	1	0	0	8.15e-06	0.000110029	-5.13433	1000	Neil2	Neil2	protein_coding
chr18	77318001	77319001		22624	-33	ENSRNOG00000017146	-	0	0	1	0	1	8.08e-17	6.02e-14	-5.13347	1000	Nfatc1	Nfatc1	protein_coding
chr4	56444001	56445001		6491	-5537	ENSRNOG00000005468	-	0	0	0	1	1	3.62e-05	0.000362017	-5.12892	1000	Rbm28	Rbm28	protein_coding
chr2	187863001	187864001		3715	0	ENSRNOG00000019638	-	1	0	1	1	1	4.4e-09	2.12e-07	-5.12373	1000	Lmna	Lmna	protein_coding
chr1	218569001	218570001		2059	0	ENSRNOG00000014254	+	1	0	1	1	1	7.24e-05	0.000619952	-5.11945	1000	Cpt1a	Cpt1a	protein_coding
chr3	160558001	160559001		5787	2742	ENSRNOG00000013681	-	0	0	0	1	1	5.8e-05	0.000519733	-5.11761	1000	Kcns1	Kcns1	protein_coding
chr3	165360001	165361001		5918	0	ENSRNOG00000012175	-	1	0	1	1	1	1.12e-05	0.000141356	-5.11145	1000	Nfatc2	Nfatc2	protein_coding
chr17	27384001	27385001		21608	-4892	ENSRNOG00000052557	+	0	0	1	0	0	0.00111899	0.00555921	-5.10929	1000	LOC102546383	Riok1	lincRNA
chr12	2133001	2134001		17117	-23	ENSRNOG00000000986	+	0	0	1	0	0	2.68e-06	4.44e-05	-5.10908	1000	Camsap3	Camsap3	protein_coding
chr6	124896001	124897001		10172	-19292	ENSRNOG00000046309	-	0	0	0	0	0	9.11e-05	0.000749239	-5.10166	1000	Gpr68	Gpr68	protein_coding
chr10	15161001	15162001		14706	0	ENSRNOG00000019684	-	1	0	1	1	1	3.19e-08	1.11e-06	-5.0905	1000	Antkmt	Fam173a	protein_coding
chr1	5365001	5366001		36	-380	ENSRNOG00000014852	+	0	0	1	0	0	3.33e-08	1.15e-06	-5.08184	1000	Fbxo30	Fbxo30	protein_coding
chr7	14189001	14190001		10800	0	ENSRNOG00000004346	-	1	0	1	1	1	2.13e-08	7.9e-07	-5.08095	1000	Notch3	Notch3	protein_coding
chr6	24986001	24987001		9485	-286	ENSRNOG00000007951	-	0	0	1	0	0	1.07e-06	2.13e-05	-5.07259	1000	Galnt14	Galnt14	protein_coding
chr16	21088001	21089001		20780	509	ENSRNOG00000049949	-	0	0	1	1	1	4.14e-08	1.38e-06	-5.06192	1000	Hapln4	Hapln4	protein_coding
chr6	132938001	132939001		10296	19547	ENSRNOG00000004650	-	0	0	0	1	0	8.75e-07	1.82e-05	-5.05636	1000	Begain	Begain	protein_coding
chr17	15880001	15881001		21483	328	ENSRNOG00000016587	-	0	0	1	0	1	0.00117869	0.00577213	-5.05536	1000	Ninj1	Ninj1	protein_coding
chr8	5437001	5438001		12210	0	ENSRNOG00000008390	+	1	0	1	1	1	1.65e-10	1.32e-08	-5.0494	1000	Dcun1d5	Dcun1d5	protein_coding
chr17	84840001	84841001		21958	-9817	ENSRNOG00000033330	-	0	0	0	0	0	1.34e-17	1.27e-14	-5.04013	1000	Skida1	Mllt10	protein_coding
chr14	10978001	10979001		19025	20842	ENSRNOG00000057070	+	0	0	0	0	0	0.000469351	0.00278745	-5.03865	1000	AABR07014350.1	Tmem150c	lincRNA
chr6	95932001	95933001		9892	1297	ENSRNOG00000022777	-	0	0	0	0	1	1.87e-06	3.3e-05	-5.03117	1000	Six1	Six1	protein_coding
chr11	87058001	87059001		17023	0	ENSRNOG00000000281	+	1	0	1	1	1	0.000312081	0.00200789	-5.01952	1000	Prodh1	Prodh1	protein_coding
chr7	142624001	142625001		12074	48325	ENSRNOG00000005309	+	0	0	0	1	1	2.09e-07	5.42e-06	-5.01278	1000	Scn8a	Scn8a	protein_coding
chr8	91070001	91071001		13010	0	ENSRNOG00000009613	+	0	0	1	1	1	1.9e-12	3.04e-10	-5.01033	1000	Sh3bgrl2	Sh3bgrl2	protein_coding
chr7	63922001	63923001		11153	0	ENSRNOG00000028782	+	1	0	1	1	0	0.00178877	0.00801018	-4.99022	1000	RGD1565498	RGD1565498	protein_coding
chr15	33091001	33092001		19975	16561	ENSRNOG00000010947	+	0	0	0	0	0	2.56e-06	4.29e-05	-4.98918	1000	Mmp14	Mmp14	protein_coding
chr1	166981001	166982001		1555	-1176	ENSRNOG00000019936	+	0	0	1	0	0	1.32e-06	2.53e-05	-4.97755	1000	Anapc15	Anapc15	protein_coding
chr1	214208001	214209001		1974	0	ENSRNOG00000035616	+	0	0	1	1	0	0.00139284	0.00659295	-4.97513	1000	Mir3574	Mir210	miRNA
chr18	24570001	24571001		22161	0	ENSRNOG00000016231	+	1	0	1	1	1	7.27e-09	3.18e-07	-4.96942	1000	Polr2d	Polr2d	protein_coding
chr17	79676001	79677001		21933	0	ENSRNOG00000016538	-	1	0	1	1	1	0.000466138	0.00277317	-4.95848	1000	Itga8	Itga8	protein_coding
chr16	79700001	79701001		21120	0	ENSRNOG00000012333	-	1	0	1	1	0	0.000635898	0.00355253	-4.9501	1000	Kbtbd11	Kbtbd11	protein_coding
chr12	23604001	23605001		17486	-1043	ENSRNOG00000060799	-	0	0	1	1	1	0.000512536	0.00298903	-4.94918	1000	AABR07035819.2	Polr2j	miRNA
chr11	65209001	65210001		16781	0	ENSRNOG00000002833	-	1	0	1	1	0	9.53e-10	5.83e-08	-4.93966	1000	Gsk3b	Gsk3b	protein_coding
chr11	67647001	67648001		16800	0	ENSRNOG00000002253	-	1	0	1	1	0	0.00026414	0.00176091	-4.93948	1000	Wdr5b	Wdr5b	protein_coding
chr5	173024001	173025001		9268	0	ENSRNOG00000017075	+	1	0	1	1	0	0.00020103	0.00141445	-4.931	1000	Slc35e2b	Slc35e2b	protein_coding
chr3	72080001	72081001		5015	0	ENSRNOG00000006050	+	1	0	1	1	1	4.73e-06	6.95e-05	-4.91523	1000	Med19	Med19	protein_coding
chr17	8299001	8300001		21314	0	ENSRNOG00000058482	+	0	0	1	1	0	3.48e-06	5.44e-05	-4.91408	1000	Gm45623	Smad5	protein_coding
chr6	99434001	99435001		9930	430	ENSRNOG00000006472	+	0	0	1	1	1	1.46e-06	2.73e-05	-4.9092	1000	Hspa2	Hspa2	protein_coding
chr5	72270001	72271001		7907	16670	ENSRNOG00000016299	-	0	0	0	0	0	4.56e-09	2.18e-07	-4.90214	1000	Klf4	Klf4	protein_coding
chr10	110446001	110447001		16511	205	ENSRNOG00000036664	+	0	0	1	0	1	0.000101519	0.000825046	-4.89951	1000	Narf	Narf	protein_coding
chr3	3655001	3656001		4400	4007	ENSRNOG00000018427	-	0	0	0	1	1	3.91e-06	5.98e-05	-4.89946	1000	Lhx3	Qsox2	protein_coding
chr9	46656001	46657001		13926	-576	ENSRNOG00000014013	+	0	0	1	0	0	4.01e-06	6.09e-05	-4.89779	1000	Map4k4	Map4k4	protein_coding
chr17	72424001	72425001		21883	-4619	ENSRNOG00000019336	+	0	0	1	0	0	3.8e-05	0.000375206	-4.88425	1000	Gata3	Gata3	protein_coding
chr5	2043001	2044001		7458	0	ENSRNOG00000031730	+	1	0	1	1	1	0.000180834	0.00130779	-4.85003	1000	Eloc	Eloc	protein_coding
chr2	136994001	136995001		3474	794	ENSRNOG00000031974	+	0	0	1	1	1	1.07e-06	2.12e-05	-4.84969	1000	Pcdh10	RGD1307595	protein_coding
chr2	31858001	31859001		3066	11694	ENSRNOG00000052924	-	0	0	0	0	1	1.99e-08	7.43e-07	-4.84234	1000	AABR07007863.1	Pik3r1	lincRNA
chr7	11995001	11996001		10654	2459	ENSRNOG00000018212	+	1	0	0	1	1	0.00156763	0.00723665	-4.82785	1000	Abhd17a	Abhd17a	protein_coding
chr13	110581001	110582001		18850	26981	ENSRNOG00000058314	+	0	0	0	0	0	9.02e-05	0.000744165	-4.81818	1000	AABR07022162.2	Nek2	lincRNA
chr4	170620001	170621001		7352	0	ENSRNOG00000008933	-	1	0	1	1	1	2.72e-07	6.73e-06	-4.81064	1000	Plbd1	Plbd1	protein_coding
chr3	81814001	81815001		5088	0	ENSRNOG00000008000	+	1	0	1	1	1	0.000126887	0.000985084	-4.80602	1000	Syt13	Syt13	protein_coding
chr15	28377001	28378001		19942	0	ENSRNOG00000052354	+	1	0	1	1	0	2.57e-05	0.000275325	-4.80066	1000	Arhgef40	Arhgef40	protein_coding
chr19	57073001	57074001		23421	8094	ENSRNOG00000019143	+	0	0	0	1	1	0.00141244	0.0066728	-4.79995	1000	Galnt2	Galnt2	protein_coding
chr5	171440001	171441001		9215	-561	ENSRNOG00000014805	+	0	0	1	0	0	4.38e-08	1.46e-06	-4.79986	1000	Wrap73	Wrap73	protein_coding
chr16	20282001	20283001		20686	-3188	ENSRNOG00000018781	-	0	0	1	0	0	0.00172037	0.00777605	-4.79835	1000	Map1s	Map1s	protein_coding
chr2	196046001	196047001		3833	0	ENSRNOG00000020979	-	1	0	1	1	1	6.45e-08	2.04e-06	-4.79042	1000	Psmb4	Psmb4	protein_coding
chr12	12638001	12639001		17263	0	ENSRNOG00000001032	+	1	0	1	1	0	0.000925983	0.00475612	-4.78641	1000	Ccz1b	Ccz1b	protein_coding
chr13	85920001	85921001		18577	1750	ENSRNOG00000004642	+	0	0	0	1	1	3.01e-09	1.55e-07	-4.78593	1000	Lmx1a	Lmx1a	protein_coding
chr2	226899001	226900001		4102	-620	ENSRNOG00000014443	+	0	0	1	0	0	4.36e-05	0.000416936	-4.78502	1000	Pde5a	Pde5a	protein_coding
chr4	124113001	124114001		7009	0	ENSRNOG00000011824	-	1	0	1	1	1	0.000179392	0.001299	-4.78451	1000	Trh	Trh	protein_coding
chr12	1229001	1230001		17099	-33411	ENSRNOG00000001090	-	0	0	0	0	0	0.00195017	0.0085971	-4.77255	1000	Stard13	Stard13	protein_coding
chr7	11754001	11755001		10634	0	ENSRNOG00000019459	-	0	0	1	1	1	0.000204312	0.0014327	-4.77002	1000	Oaz1	Oaz1	protein_coding
chr16	21392001	21393001		20802	4340	ENSRNOG00000058620	-	0	0	0	0	0	1.82e-08	6.93e-07	-4.76696	1000	U4	Atp13a1	snRNA
chr3	9237001	9238001		4531	-266	ENSRNOG00000047244	-	0	1	1	1	0	0.000607694	0.00343075	-4.76392	1000	Nup214	Aif1l	protein_coding
chr8	36467001	36468001		12448	0	ENSRNOG00000011543	-	1	0	1	1	1	1.53e-13	3.68e-11	-4.7635	1000	Fam118b	Rpusd4	protein_coding
chr10	13583001	13584001		14633	-2181	ENSRNOG00000006970	-	0	0	1	0	0	5.66e-06	8.13e-05	-4.75869	1000	Ntn3	Ntn3	protein_coding
chr8	116781001	116782001		13241	4508	ENSRNOG00000029586	+	0	0	0	0	0	8.07e-05	0.000678416	-4.75853	1000	AC128059.1	Inka1	protein_coding
chr8	94368001	94369001		13026	0	ENSRNOG00000009715	-	0	0	1	1	1	5.43e-07	1.22e-05	-4.75764	1000	Me1	Me1	protein_coding
chr2	2682001	2683001		2868	117	ENSRNOG00000012414	-	1	0	1	1	1	1.59e-10	1.28e-08	-4.75095	1000	Rhobtb3	Rhobtb3	protein_coding
chr1	226030001	226031001		2300	0	ENSRNOG00000022619	+	1	1	1	1	0	7.55e-10	4.76e-08	-4.74812	1000	Fth1	Fth1	protein_coding
chr1	103257001	103258001		1154	-179	ENSRNOG00000013981	-	0	0	1	0	0	0.000665992	0.00368225	-4.74283	1000	Ptpn5	Ptpn5	protein_coding
chr1	30681001	30682001		175	0	ENSRNOG00000011568	+	1	0	1	1	0	0.000188198	0.00134627	-4.73672	1000	Rspo3	Rspo3	protein_coding
chr17	9192001	9193001		21349	37346	ENSRNOG00000022405	+	0	0	0	0	0	0.000888566	0.0046179	-4.73051	1000	Neurog1	Neurog1	protein_coding
chr3	14538001	14539001		4682	0	ENSRNOG00000019147	-	1	0	1	1	1	0.000401798	0.00245604	-4.72239	1000	Stom	Stom	protein_coding
chr16	61795001	61796001		20985	0	ENSRNOG00000013254	+	1	0	1	1	1	7.82e-06	0.000106722	-4.72169	1000	Dctn6	Dctn6	protein_coding
chr7	122756001	122757001		11657	55148	ENSRNOG00000058914	+	0	0	0	0	0	0.000286165	0.00187594	-4.70967	1000	Rbx1	Rbx1	protein_coding
chr2	24380001	24381001		2961	-19197	ENSRNOG00000058293	-	0	0	0	0	0	5.84e-09	2.63e-07	-4.7031	1000	LOC108349922	Tbca	lincRNA
chr9	16611001	16612001		13676	0	ENSRNOG00000017144	-	1	0	1	1	1	1.26e-05	0.000156288	-4.69613	1000	Mea1	Mea1	protein_coding
chr10	89235001	89236001		15911	-257	ENSRNOG00000051344	+	0	0	1	0	0	2.22e-05	0.000244067	-4.69507	1000	Psme3	Psme3	protein_coding
chr15	19875001	19876001		19874	390	ENSRNOG00000009102	-	1	0	1	1	1	0.00014891	0.001116	-4.69239	1000	Fermt2	Fermt2	protein_coding
chr10	84718001	84719001		15733	0	ENSRNOG00000060787	-	1	0	1	1	1	2.67e-06	4.42e-05	-4.68779	1000	AABR07072169.1	Copz2	lincRNA
chr10	82006001	82007001		15626	20120	ENSRNOG00000002835	-	0	0	0	0	1	9.06e-05	0.000746765	-4.68192	1000	Luc7l3	Pou2f2	protein_coding
chr3	154394001	154395001		5710	-188	ENSRNOG00000034031	+	0	0	1	0	0	6.65e-05	0.000578411	-4.6814	1000	Vstm2l	Tti1	protein_coding
chr7	82374001	82375001		11324	-19447	ENSRNOG00000052208	+	0	0	0	0	1	0.0008606	0.00451639	-4.68073	1000	AABR07057648.1	Emc2	lincRNA
chr1	79870001	79871001		548	-23451	ENSRNOG00000038088	+	0	0	0	0	0	0.001731	0.0078138	-4.67093	1000	Nanos2	Nanos2	protein_coding
chr13	96180001	96181001		18665	-14837	ENSRNOG00000031864	+	0	0	0	0	0	2.92e-06	4.78e-05	-4.66527	1000	AABR07021871.1	Cox20	protein_coding
chr2	164118001	164119001		3591	7784	ENSRNOG00000012478	-	0	1	0	1	0	1.47e-08	5.86e-07	-4.665	1000	Shox2	Shox2	protein_coding
chr8	50200001	50201001		12587	0	ENSRNOG00000017478	+	1	0	1	1	1	2.81e-06	4.62e-05	-4.66322	1000	Pcsk7	Pcsk7	protein_coding
chr19	22282001	22283001		22871	96	ENSRNOG00000015843	+	1	0	1	1	1	5.38e-11	5.1e-09	-4.65952	1000	Itfg1	Itfg1	protein_coding
chr6	130016001	130017001		10244	-29052	ENSRNOG00000053121	+	0	0	0	0	0	0.000203787	0.00142975	-4.65881	1000	AABR07065466.1	Vrk1	snoRNA
chr14	62674001	62675001		19317	0	ENSRNOG00000058778	+	0	0	1	1	1	0.000493442	0.00289839	-4.65838	1000	AABR07015547.2	Gnpda2	lincRNA
chr1	192088001	192089001		1734	0	ENSRNOG00000025126	-	1	0	1	1	1	0.000166314	0.00122133	-4.65473	1000	Palb2	Palb2	protein_coding
chr7	130431001	130432001		11842	0	ENSRNOG00000032828	+	1	0	1	1	1	3.21e-07	7.75e-06	-4.65182	1000	Mapk8ip2	Arsa	protein_coding
chr19	55043001	55044001		23345	-50586	ENSRNOG00000043077	+	0	0	0	0	0	2.72e-05	0.000288081	-4.649	1000	Zfpm1	Zfpm1	protein_coding
chr6	111000001	111001001		10107	14599	ENSRNOG00000011285	-	0	0	0	0	0	1.41e-05	0.000169905	-4.60612	1000	Zdhhc22	Zdhhc22	protein_coding
chr10	71849001	71850001		15511	0	ENSRNOG00000002812	-	1	0	1	1	0	0.000263539	0.00175827	-4.60383	1000	Lhx1	Lhx1	protein_coding
chr13	103264001	103265001		18765	0	ENSRNOG00000002368	-	0	0	1	1	1	4.22e-10	2.94e-08	-4.60237	1000	Iars2	Bpnt1	protein_coding
chr17	44763001	44764001		21732	0	ENSRNOG00000054539	+	0	0	1	1	1	0.00158786	0.00730619	-4.6018	1000	Hist1h2ail1	Hist1h1b	protein_coding
chr15	32894001	32895001		19967	0	ENSRNOG00000009244	+	1	0	1	1	0	5.76e-07	1.28e-05	-4.59837	1000	Abhd4	Abhd4	protein_coding
chr14	35577001	35578001		19169	3032	ENSRNOG00000002244	-	0	0	0	0	1	5.68e-05	0.000511477	-4.59703	1000	Pdgfra	Pdgfra	protein_coding
chr2	198382001	198383001		3875	0	ENSRNOG00000047898	-	0	0	1	1	0	4.71e-07	1.08e-05	-4.59132	1000	Hist2h2aa3	Hist2h2aa3	protein_coding
chr7	66496001	66497001		11171	-98722	ENSRNOG00000045681	+	0	0	0	0	0	2.65e-05	0.000281889	-4.58258	1000	AABR07057347.1	Usp15	miRNA
chr5	71683001	71684001		7903	-45951	ENSRNOG00000061826	-	0	0	0	0	0	0.000348481	0.00219028	-4.58218	1000	AABR07048305.1	Rad23b	miRNA
chr6	100308001	100309001		9947	-28227	ENSRNOG00000008451	+	0	0	0	0	0	1.09e-08	4.49e-07	-4.57499	1000	Fut8	Fut8	protein_coding
chr2	86996001	86997001		3275	0	ENSRNOG00000031576	+	1	0	1	1	1	4.63e-06	6.86e-05	-4.55799	1000	Zfp455	Zfp455	protein_coding
chr2	186244001	186245001		3680	164	ENSRNOG00000016550	-	0	0	1	1	1	2.29e-06	3.91e-05	-4.55675	1000	Dclk2	Dclk2	protein_coding
chr14	18862001	18863001		19105	0	ENSRNOG00000002843	-	1	0	1	1	1	0.00127329	0.00614913	-4.55169	1000	Cxcl6	Cxcl6	protein_coding
chr13	99062001	99063001		18702	38209	ENSRNOG00000003220	-	0	0	0	0	0	3.19e-05	0.000327808	-4.53405	1000	H3f3b	Acbd3	protein_coding
chr5	159845001	159846001		8920	0	ENSRNOG00000009222	+	1	0	1	1	1	2.08e-05	0.000231634	-4.53254	1000	Epha2	Epha2	protein_coding
chr7	124982001	124983001		11721	0	ENSRNOG00000046975	-	1	0	1	1	1	6.31e-05	0.000557848	-4.52503	1000	Sult4a1	Sult4a1	protein_coding
chr7	125569001	125570001		11733	-6328	ENSRNOG00000012475	+	0	0	0	0	0	5e-06	7.3e-05	-4.52092	1000	Prr5	Prr5	protein_coding
chr7	120580001	120581001		11598	0	ENSRNOG00000012886	+	1	0	1	1	1	1.14e-15	6.13e-13	-4.5194	1000	Maff	Maff	protein_coding
chr4	113100001	113101001		6834	-101	ENSRNOG00000053836	+	0	0	1	0	0	4.76e-08	1.57e-06	-4.5169	1000	AABR07061261.1	Tacr1	protein_coding
chr10	14323001	14324001		14674	171	ENSRNOG00000024661	-	0	0	1	0	1	4.7e-09	2.24e-07	-4.51449	1000	Jpt2	Jpt2	protein_coding
chr1	40933001	40934001		254	-11494	ENSRNOG00000019544	-	0	0	0	0	0	4.36e-05	0.000417008	-4.51255	1000	Zbtb2	Zbtb2	protein_coding
chr5	159187001	159188001		8896	-25153	ENSRNOG00000054390	+	0	0	0	0	0	0.000717	0.00390506	-4.51253	1000	AABR07050283.1	Padi6	lincRNA
chr6	104610001	104611001		9997	-27	ENSRNOG00000005513	+	0	0	1	0	0	5.01e-06	7.3e-05	-4.5107	1000	Srsf5	Srsf5	protein_coding
chr7	114323001	114324001		11430	0	ENSRNOG00000009103	+	1	0	1	1	1	0.000222313	0.0015291	-4.51016	1000	Chrac1	Chrac1	protein_coding
chr4	138885001	138886001		7059	0	ENSRNOG00000006534	-	1	0	1	1	1	1.01e-06	2.04e-05	-4.50953	1000	Crbn	Crbn	protein_coding
chr18	36597001	36598001		22325	417	ENSRNOG00000027250	+	0	0	1	0	1	0.000248967	0.0016754	-4.50721	1000	Rbm27	Lars	protein_coding
chr6	60054001	60055001		9717	0	ENSRNOG00000004498	-	0	0	1	1	1	5.73e-05	0.000514952	-4.49894	1000	Scin	Scin	protein_coding
chr8	72494001	72495001		12870	88254	ENSRNOG00000017766	+	0	0	0	0	1	1.61e-06	2.94e-05	-4.49705	1000	Ca12	Ca12	protein_coding
chr1	88919001	88920001		861	292	ENSRNOG00000020864	-	1	0	1	1	1	1.09e-05	0.000138941	-4.49662	1000	Kirrel2	Kirrel2	protein_coding
chr2	41418001	41419001		3104	0	ENSRNOG00000041930	+	0	0	1	1	1	1.02e-15	5.82e-13	-4.48535	1000	AABR07008066.1	Pde4d	miRNA
chr4	60358001	60359001		6552	0	ENSRNOG00000013211	-	1	0	1	1	1	9.45e-09	3.95e-07	-4.48311	1000	Chchd3	Chchd3	protein_coding
chr2	235742001	235743001		4157	3586	ENSRNOG00000045743	+	0	0	0	1	1	0.00143567	0.00675462	-4.47773	1000	Etnppl	Ostc	protein_coding
chr12	30202001	30203001		17587	0	ENSRNOG00000000913	+	1	0	1	1	1	8.72e-06	0.000115622	-4.46886	1000	Gusb	Gusb	protein_coding
chr17	18241001	18242001		21523	-61655	ENSRNOG00000056205	-	0	0	0	0	1	0.00150397	0.00700293	-4.46816	1000	U6	Kif13a	snRNA
chr5	59783001	59784001		7810	0	ENSRNOG00000013598	+	1	0	1	1	1	0.000357089	0.00223354	-4.45727	1000	Melk	Melk	protein_coding
chr4	44936001	44937001		6438	0	ENSRNOG00000056207	+	1	0	1	1	1	5.81e-06	8.34e-05	-4.4568	1000	Capza2	Capza2	protein_coding
chr8	22204001	22205001		12319	14402	ENSRNOG00000020828	+	0	0	0	0	1	5.87e-05	0.000523944	-4.45342	1000	Pde4a	Pde4a	protein_coding
chr3	111049001	111050001		5250	0	ENSRNOG00000012811	+	1	0	1	1	1	2.12e-07	5.47e-06	-4.44835	1000	Spint1	Spint1	protein_coding
chr19	45939001	45940001		23186	87	ENSRNOG00000011552	+	1	0	1	1	1	5.89e-05	0.000525097	-4.44405	1000	Mon1b	Mon1b	protein_coding
chr5	139581001	139582001		8338	-15732	ENSRNOG00000046607	+	0	0	0	0	0	0.00142962	0.00673727	-4.44349	1000	Cited4	Cited4	protein_coding
chr12	13363001	13364001		17286	9252	ENSRNOG00000001094	+	0	0	0	1	0	0.000147383	0.00110614	-4.43284	1000	Zfp316	Zfp316	protein_coding
chr3	110669001	110670001		5242	0	ENSRNOG00000009421	+	1	0	1	1	1	0.000843136	0.0044492	-4.42845	1000	Ivd	Ivd	protein_coding
chr3	171665001	171666001		6037	67761	ENSRNOG00000028533	+	0	0	0	0	0	0.00104392	0.00525744	-4.42348	1000	LOC689618	LOC689618	protein_coding
chr3	174711001	174712001		6083	158118	ENSRNOG00000060715	+	0	0	0	0	0	0.00168373	0.00764066	-4.42067	1000	AABR07054948.1	Psma7	lincRNA
chrX	63539001	63540001		24501	-734	ENSRNOG00000051275	-	0	0	1	0	1	5.18e-05	0.000475968	-4.42025	1000	AABR07038890.1	Apoo	antisense
chr20	7804001	7805001		23772	-13290	ENSRNOG00000000503	+	0	0	0	1	1	0.00232847	0.00990154	-4.41788	1000	Ppard	Ppard	protein_coding
chr8	71216001	71217001		12853	0	ENSRNOG00000015953	+	0	0	1	1	1	0.000270791	0.00179617	-4.4143	1000	Oaz2	Oaz2	protein_coding
chr2	79440001	79441001		3250	123571	ENSRNOG00000050680	+	0	0	0	0	0	3.53e-10	2.52e-08	-4.41348	1000	AABR07008916.1	Fbxl7	miRNA
chr1	264172001	264173001		2594	0	ENSRNOG00000013552	-	1	0	1	1	1	4.94e-06	7.21e-05	-4.41239	1000	Scd	Scd	protein_coding
chr16	44040001	44041001		20880	769120	ENSRNOG00000059162	-	0	0	0	0	0	6.74e-07	1.46e-05	-4.398	1000	AABR07025662.1	Tenm3	lincRNA
chr3	111134001	111135001		5255	-22	ENSRNOG00000014011	+	0	0	1	0	0	0.000212641	0.00147496	-4.39461	1000	Dll4	Dll4	protein_coding
chrX	155866001	155867001		24715	-3527	ENSRNOG00000055562	-	0	0	1	0	0	5.61e-10	3.72e-08	-4.38711	1000	Dkc1	Dkc1	protein_coding
chr15	8931001	8932001		19817	0	ENSRNOG00000006649	-	0	0	1	1	1	0.000961951	0.00489829	-4.38255	1000	Thrb	Nr1d2	protein_coding
chr6	10911001	10912001		9422	-384	ENSRNOG00000014879	+	0	0	1	0	0	4.97e-05	0.000460539	-4.38226	1000	Ttc7a	Ttc7a	protein_coding
chr4	133029001	133030001		7048	-81099	ENSRNOG00000056274	-	0	0	0	0	0	0.00139097	0.00658953	-4.37483	1000	AABR07061542.1	Shq1	snoRNA
chr15	6864001	6865001		19804	120551	ENSRNOG00000057251	-	0	0	0	0	0	0.00197415	0.00866712	-4.37241	1000	AABR07017038.1	Zfp385d	snoRNA
chr4	117285001	117286001		6897	10083	ENSRNOG00000015719	-	0	0	0	0	0	0.00196165	0.00863437	-4.36884	1000	Egr4	Fbxo41	protein_coding
chr14	42401001	42402001		19205	0	ENSRNOG00000053303	+	0	0	1	1	1	3.54e-12	5.13e-10	-4.3677	1000	Bend4	Slc30a9	protein_coding
chr13	109997001	109998001		18840	0	ENSRNOG00000003833	-	1	0	1	1	0	0.000481215	0.00284149	-4.3602	1000	Nenf	Nenf	protein_coding
chr3	43116001	43117001		4778	338	ENSRNOG00000005600	-	1	0	1	1	1	0.00178091	0.00799278	-4.35858	1000	Nr4a2	Nr4a2	protein_coding
chr16	53957001	53958001		20935	0	ENSRNOG00000009846	+	1	0	1	1	0	0.000244947	0.0016542	-4.35532	1000	Frg1	Frg1	protein_coding
chr1	265829001	265830001		2672	0	ENSRNOG00000018704	+	1	0	1	1	1	1.22e-05	0.0001524	-4.35439	1000	Nolc1	Nolc1	protein_coding
chr5	139597001	139598001		8339	0	ENSRNOG00000046607	+	1	0	1	1	0	4.27e-05	0.000409329	-4.3497	1000	Cited4	Cited4	protein_coding
chr14	85113001	85114001		19523	0	ENSRNOG00000008374	+	1	0	1	1	1	1.58e-05	0.00018615	-4.34727	1000	Nipsnap1	Nipsnap1	protein_coding
chr19	53036001	53037001		23277	-1268	ENSRNOG00000046443	-	0	0	1	0	0	0.000682271	0.00374807	-4.33475	1000	Mthfsd	Foxc2	protein_coding
chr19	43220001	43221001		23159	0	ENSRNOG00000018033	+	1	0	1	1	1	0.000675562	0.00372049	-4.33152	1000	Ddx19b	Ddx19b	protein_coding
chr5	9115001	9116001		7506	-20386	ENSRNOG00000049052	-	0	0	0	0	0	3.1e-05	0.000320983	-4.33106	1000	Sgk3	Mcmdc2	protein_coding
chr11	71108001	71109001		16846	0	ENSRNOG00000001774	-	0	0	1	1	0	3.08e-15	1.43e-12	-4.32993	1000	Lrch3	Fyttd1	protein_coding
chr10	16632001	16633001		14762	-2990	ENSRNOG00000020747	+	0	0	1	0	0	0.00153638	0.0071248	-4.31138	1000	Nkx2-5	Nkx2-5	protein_coding
chr7	122581001	122582001		11655	0	ENSRNOG00000018920	-	1	0	1	1	1	0.00183011	0.00815594	-4.30734	1000	Slc25a17	Slc25a17	protein_coding
chr6	136751001	136752001		10379	30420	ENSRNOG00000013661	+	0	0	0	1	0	0.000902901	0.00467257	-4.30706	1000	Kif26a	Kif26a	protein_coding
chr10	94353001	94354001		16060	-122	ENSRNOG00000025448	-	0	0	1	0	0	0.000150221	0.00112337	-4.30604	1000	Limd2	Limd2	protein_coding
chr12	17738001	17739001		17397	1715	ENSRNOG00000001312	+	0	0	0	1	1	3.14e-05	0.000324049	-4.29677	1000	Pdgfa	Pdgfa	protein_coding
chr5	140930001	140931001		8374	6088	ENSRNOG00000015318	+	0	0	0	1	1	2.36e-06	4e-05	-4.28684	1000	Heyl	Heyl	protein_coding
chrX	156428001	156429001		24726	0	ENSRNOG00000053023	-	1	0	1	1	1	1.34e-05	0.00016426	-4.2822	1000	Taz	Taz	protein_coding
chr3	12587001	12588001		4641	12338	ENSRNOG00000054789	-	0	0	0	0	0	0.00121262	0.00589621	-4.2792	1000	AABR07051462.1	Zbtb43	snoRNA
chr18	73226001	73227001		22578	0	ENSRNOG00000043171	+	0	0	1	1	1	0.000351006	0.00220292	-4.27263	1000	Hdhd2	Hdhd2	protein_coding
chrX	14498001	14499001		24372	0	ENSRNOG00000003749	+	1	0	1	1	1	9.91e-08	2.93e-06	-4.26246	1000	Xk	Xk	protein_coding
chr7	105593001	105594001		11412	-198	ENSRNOG00000004890	-	0	0	1	0	0	0.00124572	0.00602804	-4.23853	1000	Adcy8	Adcy8	protein_coding
chr13	13325001	13326001		18162	-499882	ENSRNOG00000056533	-	0	0	0	0	0	2.21e-07	5.66e-06	-4.22129	1000	U6	LOC304725	snRNA
chr1	43883001	43884001		265	268	ENSRNOG00000018052	-	1	0	1	1	1	3.29e-06	5.22e-05	-4.21546	1000	Cnksr3	Cnksr3	protein_coding
chr19	24802001	24803001		22904	1930	ENSRNOG00000004094	+	0	1	0	1	1	0.00131899	0.00631134	-4.21475	1000	Ptger1	Ptger1	protein_coding
chr10	10761001	10762001		14550	0	ENSRNOG00000003125	+	1	1	1	1	1	0.000159493	0.00118004	-4.20871	1000	Rogdi	Rogdi	protein_coding
chr14	104289001	104290001		19641	38385	ENSRNOG00000004888	+	0	0	0	1	1	0.000720237	0.00391896	-4.20732	1000	Spred2	Actr2	protein_coding
chr6	26547001	26548001		9500	78	ENSRNOG00000005301	+	0	0	1	1	1	2.74e-06	4.52e-05	-4.20726	1000	Eif2b4	Eif2b4	protein_coding
chr18	62923001	62924001		22482	41539	ENSRNOG00000018648	-	0	0	0	0	1	0.000733943	0.00398342	-4.20684	1000	Mppe1	Chmp1b	protein_coding
chr19	32189001	32190001		23019	735	ENSRNOG00000018483	+	0	0	1	0	1	0.000117509	0.000923464	-4.20216	1000	Smad1	Smad1	protein_coding
chr6	34155001	34156001		9589	0	ENSRNOG00000049088	+	1	0	1	1	1	5.59e-07	1.26e-05	-4.2019	1000	Ttc32	Wdr35	protein_coding
chr7	24716001	24717001		10869	-737	ENSRNOG00000057870	-	0	0	1	0	0	2e-05	0.000224517	-4.18984	1000	AABR07056423.1	Tmem263	lincRNA
chr5	126976001	126977001		8140	0	ENSRNOG00000010620	+	1	0	1	1	0	0.000198789	0.00140272	-4.18948	1000	Ndc1	Ndc1	protein_coding
chr2	123556001	123557001		3433	216	ENSRNOG00000038436	+	1	0	1	1	1	0.00108989	0.00543511	-4.1873	1000	RGD1307100		protein_coding
chr13	56016001	56017001		18418	101	ENSRNOG00000011063	+	0	0	1	0	1	9.31e-08	2.78e-06	-4.18661	1000	Dennd1b	RGD1566099	protein_coding
chr4	82777001	82778001		6705	256	ENSRNOG00000008393	+	0	0	1	0	1	0.000480941	0.00284149	-4.1844	1000	Tax1bp1	Tax1bp1	protein_coding
chr7	11319001	11320001		10592	0	ENSRNOG00000020466	-	1	0	1	1	1	0.00078845	0.00421387	-4.17168	1000	Apba3	Apba3	protein_coding
chr10	108157001	108158001		16405	-6491	ENSRNOG00000048113	-	0	0	0	0	0	4.69e-06	6.91e-05	-4.16604	1000	Cbx8	Cbx8	protein_coding
chr14	84335001	84336001		19506	-936	ENSRNOG00000004640	-	0	1	1	1	0	2.75e-11	2.91e-09	-4.15675	1000	Mtfp1	Mtfp1	protein_coding
chr1	219985001	219986001		2115	20573	ENSRNOG00000058842	+	0	0	0	1	1	0.000744016	0.00402609	-4.15197	1000	Sptbn2	Sptbn2	protein_coding
chr10	10530001	10531001		14541	0	ENSRNOG00000002876	+	1	0	1	1	1	4.17e-11	4.08e-09	-4.14174	1000	Eef2kmt	Eef2kmt	protein_coding
chr12	30441001	30442001		17592	0	ENSRNOG00000053790	+	0	0	1	1	1	4.08e-08	1.37e-06	-4.1411	1000	AABR07036007.1	Phkg1	protein_coding
chr12	329001	330001		17081	17107	ENSRNOG00000059668	-	0	0	0	0	0	0.0023559	0.00998508	-4.14101	1000	5_8S_rRNA	Brca2	rRNA
chr7	123579001	123580001		11694	124	ENSRNOG00000008461	+	0	0	1	1	1	1.12e-05	0.000141927	-4.13458	1000	Smdt1	Pheta2	protein_coding
chr12	48210001	48211001		18031	7956	ENSRNOG00000000658	-	0	0	0	0	1	4.65e-05	0.000438011	-4.13159	1000	Acacb	Acacb	protein_coding
chr13	89446001	89447001		18601	-12187	ENSRNOG00000046452	-	0	0	0	0	0	7.8e-05	0.00065829	-4.13151	1000	Fcgr2b	Cfap126	protein_coding
chr7	59970001	59971001		11104	-12770	ENSRNOG00000005362	-	0	0	0	0	0	5.02e-07	1.14e-05	-4.12277	1000	Rab3ip	Rab3ip	protein_coding
chr10	16047001	16048001		14750	-969	ENSRNOG00000033169	-	0	0	1	0	0	1.23e-12	2.02e-10	-4.12186	1000	Cpeb4	Cpeb4	protein_coding
chr1	94003001	94004001		964	18883	ENSRNOG00000054000	-	0	0	0	0	0	0.00117799	0.00577132	-4.12178	1000	AABR07003030.1	Uri1	miRNA
chr18	24585001	24586001		22162	102	ENSRNOG00000011382	+	1	0	1	1	1	3.9e-11	3.86e-09	-4.11846	1000	Wdr33	Wdr33	protein_coding
chrX	71412001	71413001		24523	0	ENSRNOG00000002565	+	0	0	1	1	1	0.000778546	0.00417265	-4.11648	1000	Taf1	Taf1	processed_transcript
chr10	13826001	13827001		14644	0	ENSRNOG00000009224	-	1	0	1	1	1	3.56e-06	5.55e-05	-4.11604	1000	E4f1	E4f1	protein_coding
chr5	60184001	60185001		7819	6942	ENSRNOG00000024729	-	0	0	0	0	1	1.97e-06	3.45e-05	-4.10806	1000	Pax5	Pax5	protein_coding
chr3	159863001	159864001		5768	0	ENSRNOG00000058278	-	1	0	1	1	1	0.000547536	0.00315027	-4.10569	1000	AABR07054551.1	Fitm2	pseudogene
chrX	156716001	156717001		24729	0	ENSRNOG00000059675	+	1	0	1	1	1	3.76e-08	1.28e-06	-4.09623	1000	Mir5132	Irak1	miRNA
chr15	32966001	32967001		19969	3282	ENSRNOG00000059192	+	0	0	0	1	1	0.0023434	0.00994439	-4.09262	1000	LOC102550121	Oxa1l	lincRNA
chr5	120116001	120117001		8097	19928	ENSRNOG00000061163	+	0	0	0	0	0	0.000120896	0.000947478	-4.08759	1000	U1	Jak1	snRNA
chr17	29638001	29639001		21628	0	ENSRNOG00000016226	+	1	0	1	1	1	0.000848929	0.00447432	-4.08518	1000	Rpp40	Rpp40	protein_coding
chr4	62780001	62781001		6569	0	ENSRNOG00000046109	+	1	0	1	1	1	3.23e-05	0.000330867	-4.08081	1000	LOC689574	LOC689574	protein_coding
chr16	2743001	2744001		20482	0	ENSRNOG00000014363	+	1	0	1	1	0	0.000325487	0.00208086	-4.07648	1000	Arhgef3	Il17rd	protein_coding
chr1	267505001	267506001		2724	0	ENSRNOG00000012641	+	1	0	1	1	1	0.000131491	0.00101382	-4.0756	1000	Sfr1	Sfr1	protein_coding
chr10	85477001	85478001		15767	39684	ENSRNOG00000011475	-	0	0	0	1	1	0.00105556	0.00530561	-4.07518	1000	Srcin1	Srcin1	protein_coding
chr5	173098001	173099001		9273	0	ENSRNOG00000017564	-	1	0	1	1	1	8.62e-13	1.48e-10	-4.07487	1000	Mib2	Mib2	protein_coding
chr4	157646001	157647001		7243	-83	ENSRNOG00000018453	+	0	0	1	0	0	8.84e-09	3.76e-07	-4.07057	1000	Nop2	Nop2	protein_coding
chr20	12944001	12945001		23920	0	ENSRNOG00000060382	-	1	0	1	1	1	4.1e-05	0.000398524	-4.06959	1000	AC098763.1	RGD1564149	lincRNA
chr19	10763001	10764001		22756	0	ENSRNOG00000016991	-	1	0	1	1	0	0.00116371	0.00572055	-4.06469	1000	Arl2bp	Arl2bp	protein_coding
chr5	133643001	133644001		8205	801	ENSRNOG00000057467	-	0	0	1	1	1	1.56e-05	0.000184268	-4.04627	1000	U1	Foxe3	snRNA
chr3	2803001	2804001		4384	0	ENSRNOG00000033863	-	0	0	1	1	0	0.000184546	0.00132902	-4.04074	1000	Ajm1	Phpt1	protein_coding
chr16	6077001	6078001		20512	0	ENSRNOG00000015498	-	1	0	1	1	1	0.00158718	0.00730504	-4.02189	1000	Il17rb	Il17rb	protein_coding
chr3	147599001	147600001		5575	-9096	ENSRNOG00000031167	+	0	0	0	0	0	0.000222146	0.0015291	-4.0213	1000	AABR07054319.1	Srxn1	protein_coding
chr5	167288001	167289001		9082	0	ENSRNOG00000017895	+	1	0	1	1	1	1.04e-06	2.09e-05	-4.0167	1000	Eno1	Eno1	protein_coding
chr9	1146001	1147001		13497	302	ENSRNOG00000010637	+	0	0	1	0	1	2.44e-13	5.3e-11	-4.01414	1000	Tbc1d5	Tbc1d5	protein_coding
chr6	115157001	115158001		10127	0	ENSRNOG00000003908	-	0	0	1	1	1	7.92e-05	0.000667195	-4.01055	1000	Cep128	Tshr	processed_transcript
chr1	85438001	85439001		800	0	ENSRNOG00000032034	+	1	0	1	1	1	0.00218355	0.00940579	-4.00406	1000	Supt5h	Supt5h	protein_coding
chr3	59987001	59988001		4914	5043	ENSRNOG00000028187	+	0	0	0	0	0	0.000280793	0.00184963	-4.00001	1000	Sp9	Sp9	protein_coding
chr9	43514001	43515001		13880	10266	ENSRNOG00000055425	+	0	0	0	0	0	1.07e-06	2.13e-05	-3.99747	1000	AABR07067405.1	Zap70	lincRNA
chr20	2095001	2096001		23502	0	ENSRNOG00000000780	+	1	0	1	1	1	0.00170876	0.0077338	-3.99612	1000	Ppp1r11	Ppp1r11	protein_coding
chr20	38984001	38985001		24166	37	ENSRNOG00000029360	-	0	0	1	1	1	1.39e-05	0.00016791	-3.97213	1000	Serinc1	Serinc1	protein_coding
chr6	146098001	146099001		10462	54	ENSRNOG00000005451	-	0	0	1	1	1	3.68e-05	0.000366089	-3.97169	1000	Dnah11	Sp4	protein_coding
chr4	7322001	7323001		6259	7633	ENSRNOG00000023449	+	0	1	0	1	1	6.37e-05	0.000560296	-3.97134	1000	Atg9b	Atg9b	protein_coding
chr18	58270001	58271001		22440	0	ENSRNOG00000043304	+	1	0	1	1	1	3.33e-06	5.27e-05	-3.96718	1000	Apcdd1	Napg	protein_coding
chr1	131440001	131441001		1273	-8054	ENSRNOG00000059662	-	0	0	0	0	0	0.00185268	0.00823309	-3.96557	1000	AABR07004228.1	Nr2f2	lincRNA
chr8	117621001	117622001		13281	685	ENSRNOG00000053889	+	0	0	1	1	0	1.42e-06	2.67e-05	-3.95942	1000	Celsr3	Celsr3	protein_coding
chr17	10527001	10528001		21410	0	ENSRNOG00000017607	-	1	0	1	1	1	4.06e-05	0.000396037	-3.95431	1000	Faf2	Faf2	protein_coding
chr5	107712001	107713001		8038	0	ENSRNOG00000006615	+	1	0	1	1	1	3.88e-07	9.08e-06	-3.94941	1000	Mtap	Mtap	protein_coding
chr9	17641001	17642001		13718	51201	ENSRNOG00000019734	-	0	0	0	0	0	8.1e-08	2.45e-06	-3.9475	1000	Mrpl14	Mrpl14	protein_coding
chr6	104339001	104340001		9991	-207	ENSRNOG00000038297	+	0	0	1	0	0	0.000618722	0.00347926	-3.94711	1000	Plekhd1	Plekhd1	protein_coding
chr19	11300001	11301001		22767	1939	ENSRNOG00000025764	-	0	0	0	0	0	0.000303842	0.00196966	-3.94041	1000	AC128848.1	Mt1	protein_coding
chr4	160333001	160334001		7286	911	ENSRNOG00000053804	-	0	0	1	0	1	6.54e-05	0.000571462	-3.94003	1000	Prmt8	Prmt8	protein_coding
chr17	44841001	44842001		21737	0	ENSRNOG00000052594	-	0	0	1	1	0	1.99e-05	0.000224517	-3.93966	1000	Hist1h2ak	Hist1h2ak	protein_coding
chr17	89923001	89924001		22013	0	ENSRNOG00000017642	-	1	0	1	1	1	7.21e-08	2.22e-06	-3.92783	1000	Acbd5	Acbd5	protein_coding
chr7	60777001	60778001		11117	137	ENSRNOG00000027622	-	1	0	1	1	1	4.49e-08	1.49e-06	-3.92065	1000	Slc35e3	Slc35e3	protein_coding
chr6	46633001	46634001		9659	-1019	ENSRNOG00000030034	-	0	0	1	0	0	0.00127611	0.00615772	-3.91735	1000	Sox11	LOC310926	protein_coding
chr4	85663001	85664001		6731	110	ENSRNOG00000012098	+	1	0	1	1	1	1.24e-07	3.52e-06	-3.91025	1000	Adcyap1r1	Adcyap1r1	protein_coding
chr8	59078001	59079001		12657	-312	ENSRNOG00000009170	-	0	0	1	0	0	0.000633877	0.00354355	-3.90791	1000	Dmxl2	Cib2	protein_coding
chr8	28044001	28045001		12395	0	ENSRNOG00000048164	-	0	0	1	1	1	0.00191061	0.00844226	-3.90738	1000	Acad8	Thyn1	protein_coding
chr1	207654001	207655001		1912	0	ENSRNOG00000018917	+	0	0	1	1	1	7.73e-05	0.000653309	-3.89367	1000	Foxi2	Clrn3	protein_coding
chr1	173606001	173607001		1601	-102	ENSRNOG00000046566	+	0	0	1	0	0	0.000761363	0.00409978	-3.893	1000	Tub	Tub	protein_coding
chr7	11677001	11678001		10625	0	ENSRNOG00000019682	+	1	1	1	1	1	6.27e-10	4.11e-08	-3.89151	1000	Timm13	Timm13	protein_coding
chr10	11723001	11724001		14580	-33	ENSRNOG00000005418	+	0	0	1	0	0	0.000384217	0.00236173	-3.88996	1000	Trap1	Trap1	protein_coding
chr1	80232001	80233001		585	-10292	ENSRNOG00000046667	-	0	0	0	0	0	1.96e-05	0.000222022	-3.8897	1000	Fosb	Fosb	protein_coding
chr1	187779001	187780001		1691	0	ENSRNOG00000017751	-	1	0	1	1	1	0.000160026	0.00118324	-3.88766	1000	Arl6ip1	Arl6ip1	protein_coding
chr6	91676001	91677001		9840	0	ENSRNOG00000056128	-	0	0	1	1	1	3.58e-11	3.6e-09	-3.87722	1000	AABR07064719.2	Nemf	protein_coding
chr1	165624001	165625001		1532	-59	ENSRNOG00000018176	+	0	0	1	0	0	2.53e-05	0.000271081	-3.87409	1000	Rab6a	Rab6a	protein_coding
chr10	56441001	56442001		15215	0	ENSRNOG00000015430	-	1	0	1	1	1	7.03e-05	0.000604748	-3.8655	1000	Nlgn2	Nlgn2	protein_coding
chr2	140746001	140747001		3497	-11117	ENSRNOG00000048907	-	0	0	0	0	0	0.00200276	0.00875687	-3.85925	1000	AABR07010563.1	Mgst2	pseudogene
chr10	91117001	91118001		15983	0	ENSRNOG00000021682	-	1	0	1	1	1	4.72e-21	8.99e-18	-3.85875	1000	Dcakd	Dcakd	protein_coding
chr3	94657001	94658001		5145	0	ENSRNOG00000042576	-	1	0	1	1	1	2.87e-12	4.28e-10	-3.85627	1000	Tcp11l1	Tcp11l1	protein_coding
chr4	181874001	181875001		7436	0	ENSRNOG00000001847	+	1	0	1	1	0	1.15e-06	2.25e-05	-3.85614	1000	Ccdc91	Ccdc91	protein_coding
chr10	109523001	109524001		16465	-2156	ENSRNOG00000036701	-	0	0	1	0	0	0.000444414	0.00266427	-3.85591	1000	Actg1	Actg1	protein_coding
chr3	148945001	148946001		5613	-12124	ENSRNOG00000010417	-	0	0	0	0	0	7.73e-06	0.000105983	-3.85163	1000	Nol4l	Commd7	protein_coding
chr14	83219001	83220001		19471	0	ENSRNOG00000018144	-	1	0	1	1	1	0.000160091	0.00118324	-3.84196	1000	Depdc5	Depdc5	protein_coding
chr11	44176001	44177001		16706	-15941	ENSRNOG00000001653	+	0	0	0	0	0	1.76e-06	3.15e-05	-3.8401	1000	St3gal6	St3gal6	protein_coding
chr8	110811001	110812001		13146	1001	ENSRNOG00000007865	-	0	0	0	0	1	0.00156782	0.00723665	-3.83847	1000	Ephb1	Ephb1	protein_coding
chr18	43944001	43945001		22353	274	ENSRNOG00000059142	-	0	0	1	1	1	0.000107051	0.0008574	-3.83845	1000	Dtwd2	Dtwd2	protein_coding
chr6	92058001	92059001		9848	-186	ENSRNOG00000004893	-	1	0	1	1	1	0.00172813	0.0078029	-3.83682	1000	Dmac2l	Dmac2l	protein_coding
chr1	65612001	65613001		400	0	ENSRNOG00000060429	-	1	0	1	1	0	6.22e-06	8.8e-05	-3.83371	1000	AABR07002065.2	Slc27a5	protein_coding
chr14	107615001	107616001		19681	1162	ENSRNOG00000009267	-	0	0	0	0	1	0.0001295	0.00100253	-3.83204	1000	B3gnt2	B3gnt2	protein_coding
chr3	110367001	110368001		5231	0	ENSRNOG00000007906	+	1	0	1	1	0	3.95e-05	0.000387455	-3.83174	1000	Bub1b	Bub1b	protein_coding
chr4	9346001	9347001		6288	-529	ENSRNOG00000021441	+	0	0	1	0	0	6.87e-05	0.000594236	-3.8311	1000	Reln	Reln	protein_coding
chr12	13997001	13998001		17309	173	ENSRNOG00000001114	-	1	0	1	1	1	5.48e-05	0.000497082	-3.83095	1000	Wipi2	Wipi2	protein_coding
chr19	37601001	37602001		23068	854	ENSRNOG00000017674	+	0	0	1	0	1	1.25e-07	3.53e-06	-3.82964	1000	Ctcf	Ctcf	protein_coding
chr2	198509001	198510001		3880	-5573	ENSRNOG00000061732	+	0	0	0	0	0	0.000286209	0.00187594	-3.82785	1000	U1	Fcgr1a	snRNA
chr1	198283001	198284001		1781	-474	ENSRNOG00000019920	+	0	0	1	0	0	1.84e-05	0.000211391	-3.82376	1000	Doc2a	Doc2a	protein_coding
chr13	35531001	35532001		18217	-19982	ENSRNOG00000002440	-	0	0	0	0	0	1.1e-05	0.000139998	-3.82204	1000	Ralb	Ralb	protein_coding
chr14	39154001	39155001		19200	0	ENSRNOG00000002336	+	1	0	1	1	1	0.00222281	0.00953612	-3.8205	1000	Gabra4	Gabra4	protein_coding
chr7	35125001	35126001		11002	0	ENSRNOG00000007407	+	1	0	1	1	1	0.000104097	0.00083959	-3.8189	1000	Ndufa12	Ndufa12	protein_coding
chr1	124311001	124312001		1212	0	ENSRNOG00000056061	-	0	0	1	1	1	1.86e-06	3.28e-05	-3.81637	1000	AABR07004090.1	Hmgn5b	lincRNA
chr3	114828001	114829001		5317	0	ENSRNOG00000000170	-	1	0	1	1	0	6.75e-13	1.26e-10	-3.8142	1000	Slc30a4	Slc30a4	protein_coding
chr1	181770001	181771001		1664	369571	ENSRNOG00000039241	-	0	0	0	0	0	3.62e-06	5.61e-05	-3.8139	1000	Ythdc2	Copb1	protein_coding
chr12	19297001	19298001		17420	-2114	ENSRNOG00000001341	-	0	0	1	0	0	7.16e-05	0.000614612	-3.81232	1000	Zfp113	Cops6	protein_coding
chr7	143449001	143450001		12110	3545	ENSRNOG00000050420	-	0	0	0	1	1	2.05e-06	3.56e-05	-3.80421	1000	Krt5	Krt1	protein_coding
chr1	211294001	211295001		1937	-28720	ENSRNOG00000017243	-	0	0	0	0	0	9.09e-05	0.000748834	-3.80228	1000	Bnip3	Bnip3	protein_coding
chr20	18686001	18687001		23972	91965	ENSRNOG00000000613	+	0	0	0	0	0	0.000997121	0.00503995	-3.80197	1000	Tfam	Tfam	protein_coding
chr4	123401001	123402001		6998	92743	ENSRNOG00000045821	-	0	0	0	0	1	3e-06	4.87e-05	-3.80027	1000	Slc41a3	Slc41a3	protein_coding
chr5	155203001	155204001		8788	457	ENSRNOG00000012531	-	0	0	1	0	1	0.000176479	0.00128333	-3.78831	1000	Ephb2	Ephb2	protein_coding
chr4	5842001	5843001		6204	4	ENSRNOG00000007493	+	1	0	1	1	1	3.86e-08	1.31e-06	-3.78289	1000	Xrcc2	Xrcc2	protein_coding
chr16	19872001	19873001		20647	0	ENSRNOG00000000054	-	1	0	1	1	1	0.000106281	0.000852827	-3.78282	1000	Abhd8	Abhd8	protein_coding
chr3	160232001	160233001		5778	88	ENSRNOG00000010816	+	0	0	1	1	1	0.00020857	0.00145615	-3.77999	1000	Kcnk15	Kcnk15	protein_coding
chr6	135724001	135725001		10339	0	ENSRNOG00000009050	+	1	0	1	1	1	2.12e-05	0.000234663	-3.77367	1000	Amn	Amn	protein_coding
chr19	59383001	59384001		23468	298	ENSRNOG00000053574	-	0	0	1	1	1	2.41e-08	8.74e-07	-3.768	1000	Tarbp1	Tomm20	protein_coding
chr14	78523001	78524001		19381	-25348	ENSRNOG00000043857	+	0	0	0	0	0	0.00067557	0.00372049	-3.76677	1000	AABR07015814.1	Jakmip1	miRNA
chr9	84383001	84384001		14200	0	ENSRNOG00000014119	-	1	0	1	1	1	2.89e-06	4.73e-05	-3.76347	1000	Farsb	Farsb	protein_coding
chr1	240909001	240910001		2380	519	ENSRNOG00000014215	+	0	0	1	1	1	4.99e-08	1.63e-06	-3.76034	1000	Klf9	Klf9	protein_coding
chr14	55080001	55081001		19282	552	ENSRNOG00000012367	-	0	0	1	1	0	0.000555342	0.00318417	-3.75307	1000	Pcdh7	Pcdh7	protein_coding
chr18	62850001	62851001		22481	0	ENSRNOG00000010440	+	0	0	1	1	1	2.49e-08	8.91e-07	-3.75064	1000	Gnal	Gnal	protein_coding
chr1	278480001	278481001		2801	0	ENSRNOG00000061365	-	0	0	1	1	0	1.64e-05	0.00019273	-3.74894	1000	AABR07007055.1	Trub1	lincRNA
chr1	40983001	40984001		256	96	ENSRNOG00000019489	+	0	0	1	0	1	0.00159455	0.00733109	-3.74561	1000	Armt1	Armt1	protein_coding
chr6	125870001	125871001		10183	0	ENSRNOG00000005733	+	1	0	1	1	1	9.62e-08	2.85e-06	-3.7428	1000	Cpsf2	Cpsf2	protein_coding
chr7	117041001	117042001		11472	0	ENSRNOG00000047521	-	1	0	1	1	1	1.32e-06	2.53e-05	-3.73745	1000	Ccdc166	Ccdc166	protein_coding
chr1	265792001	265793001		2667	0	ENSRNOG00000018468	-	1	0	1	1	1	1.38e-06	2.62e-05	-3.73408	1000	Ldb1	Ldb1	protein_coding
chr2	183263001	183264001		3661	-12074	ENSRNOG00000061763	-	0	0	0	0	0	6.96e-05	0.000601087	-3.73032	1000	AABR07012039.1	Trim2	protein_coding
chr15	40793001	40794001		20092	0	ENSRNOG00000056083	-	0	0	1	1	1	0.000741549	0.00401453	-3.72613	1000	AABR07018119.2	Spata13	lincRNA
chr8	55196001	55197001		12625	0	ENSRNOG00000010743	+	1	0	1	1	0	6.68e-08	2.1e-06	-3.72184	1000	Fdxacb1	Fdxacb1	protein_coding
chr15	42017001	42018001		20110	-55739	ENSRNOG00000051849	-	0	0	0	0	0	0.00167863	0.00763167	-3.71894	1000		Kcnrg	miRNA
chr19	57650001	57651001		23443	0	ENSRNOG00000021330	+	1	0	1	1	1	1.69e-05	0.000197609	-3.71463	1000	Sprtn	Sprtn	protein_coding
chr13	74077001	74078001		18498	0	ENSRNOG00000004111	-	1	0	1	1	1	3.23e-05	0.000330867	-3.70591	1000	Soat1	Soat1	protein_coding
chr16	20890001	20891001		20762	0	ENSRNOG00000020229	-	1	0	1	1	1	8.39e-13	1.46e-10	-3.6963	1000	Homer3	Homer3	protein_coding
chr2	154466001	154467001		3564	-29704	ENSRNOG00000021324	+	0	0	0	0	0	3.64e-05	0.000363249	-3.69142	1000	RGD1565059	RGD1565059	protein_coding
chr16	59077001	59078001		20952	0	ENSRNOG00000010780	+	1	0	1	1	0	1.01e-07	2.97e-06	-3.68313	1000	Dlc1	Dlc1	protein_coding
chr10	35834001	35835001		14894	-141	ENSRNOG00000003343	-	0	0	1	0	0	0.000383128	0.00235959	-3.68239	1000	Canx	Canx	protein_coding
chr1	198067001	198068001		1769	0	ENSRNOG00000019245	+	1	0	1	1	1	4.75e-05	0.000444915	-3.68207	1000	Sgf29	Sgf29	protein_coding
chr13	109552001	109553001		18830	0	ENSRNOG00000003832	-	1	0	1	1	1	1.81e-06	3.21e-05	-3.6777	1000	Vash2	Vash2	protein_coding
chr16	2958001	2959001		20484	0	ENSRNOG00000014363	+	1	0	1	1	1	3.84e-05	0.000377938	-3.67686	1000	Arhgef3	Arhgef3	protein_coding
chr10	108479001	108480001		16421	-369	ENSRNOG00000030537	+	0	0	1	0	0	7.63e-05	0.00064704	-3.6731	1000	Slc26a11	Eif4a3	protein_coding
chr10	85829001	85830001		15791	-3267	ENSRNOG00000036882	-	0	0	1	0	0	0.00179259	0.00802057	-3.67153	1000	Fbxo47	Lasp1	protein_coding
chr18	17043001	17044001		22142	0	ENSRNOG00000027230	+	1	0	1	1	1	0.000782796	0.00419149	-3.66611	1000	Fhod3	Tpgs2	protein_coding
chr7	11007001	11008001		10551	-3217	ENSRNOG00000005874	-	0	0	1	0	0	8.14e-06	0.000110029	-3.66101	1000	Tle2	Tle2	protein_coding
chr11	88424001	88425001		17063	0	ENSRNOG00000025787	+	1	0	1	1	1	0.000164925	0.00121425	-3.65655	1000	Spag6l	Spag6	protein_coding
chr19	15733001	15734001		22793	0	ENSRNOG00000011037	-	1	0	1	1	0	1.82e-08	6.93e-07	-3.65474	1000	Irx6	Irx6	protein_coding
chr1	103173001	103174001		1152	15	ENSRNOG00000013663	+	1	0	1	1	1	3.12e-10	2.3e-08	-3.64957	1000	Tmem86a	Tmem86a	protein_coding
chr2	41417001	41418001		3103	-814	ENSRNOG00000042536	+	0	0	1	0	1	2.98e-12	4.4e-10	-3.64566	1000	Pde4d	Pde4d	protein_coding
chr2	11672001	11673001		2900	13434	ENSRNOG00000033134	+	0	0	0	0	1	0.000374036	0.00231023	-3.64482	1000	Mef2c	Mir9-2	protein_coding
chr11	82373001	82374001		16943	0	ENSRNOG00000001783	+	1	0	1	1	0	4.76e-05	0.000445954	-3.64476	1000	Tra2b	Tra2b	protein_coding
chr1	78112001	78113001		504	0	ENSRNOG00000047575	-	1	0	1	1	1	3.42e-06	5.38e-05	-3.64249	1000	Dhx34	Dhx34	protein_coding
chr19	9843001	9844001		22724	0	ENSRNOG00000011863	-	1	0	1	1	1	3.65e-07	8.6e-06	-3.6335	1000	Gins3	Gins3	protein_coding
chr7	113937001	113938001		11425	0	ENSRNOG00000009265	-	1	0	1	1	1	0.000676517	0.00372363	-3.63125	1000	Kcnk9	Kcnk9	protein_coding
chr14	45797001	45798001		19249	0	ENSRNOG00000002180	-	1	0	1	1	1	0.000965803	0.0049077	-3.63042	1000	Tbc1d1	Pgm2	protein_coding
chr4	117234001	117235001		6893	0	ENSRNOG00000050483	-	1	0	1	1	1	8.54e-11	7.39e-09	-3.62674	1000	Pradc1	Cct7	protein_coding
chr1	219718001	219719001		2106	273	ENSRNOG00000019306	-	0	0	1	0	1	0.000964611	0.00490431	-3.61716	1000	Syt12	Syt12	protein_coding
chr10	103955001	103956001		16228	-20	ENSRNOG00000032780	+	0	0	1	0	0	0.000124892	0.000972571	-3.60361	1000	Mrpl58	Mrpl58	protein_coding
chr1	61398001	61399001		367	0	ENSRNOG00000060256	-	0	0	1	1	1	4.15e-05	0.000400898	-3.59631	1000	RNaseP_nuc	Zfp52	ribozyme
chr5	159735001	159736001		8916	0	ENSRNOG00000023346	+	1	1	1	1	1	0.00225358	0.00964924	-3.59401	1000	Cplane2	Cplane2	protein_coding
chr19	9972001	9973001		22727	0	ENSRNOG00000011933	+	0	0	1	1	1	2.18e-10	1.68e-08	-3.59268	1000	Csnk2a2	Csnk2a2	protein_coding
chr8	131627001	131628001		13477	-23096	ENSRNOG00000055245	-	0	0	0	0	0	1.34e-06	2.56e-05	-3.59064	1000	LOC103690477	Mir138-1	lincRNA
chr10	1465001	1466001		14495	222	ENSRNOG00000045696	+	0	0	1	0	1	0.000530303	0.00306783	-3.58823	1000	AABR07028979.1	Bfar	transcribed_processed_pseudogene
chr17	48562001	48563001		21754	0	ENSRNOG00000012490	-	1	0	1	1	1	2.07e-06	3.6e-05	-3.58339	1000	Amph	Amph	protein_coding
chr16	20153001	20154001		20684	817	ENSRNOG00000060135	-	0	0	1	1	0	0.00117319	0.00575507	-3.57971	1000	AABR07024869.2	Fcho1	lincRNA
chr3	62481001	62482001		4967	0	ENSRNOG00000052968	+	0	0	1	1	1	1.4e-06	2.65e-05	-3.57967	1000	Hnrnpa3	Hnrnpa3	protein_coding
chr9	73815001	73816001		14091	-15575	ENSRNOG00000028149	-	0	0	0	0	0	9.11e-05	0.000749239	-3.56753	1000	Kansl1l	Acadl	protein_coding
chr6	42312001	42313001		9617	0	ENSRNOG00000024338	-	1	0	1	1	1	0.00188737	0.00836329	-3.55872	1000	LOC690276	LOC690276	protein_coding
chr5	8978001	8979001		7505	-350	ENSRNOG00000021702	+	0	1	1	1	0	1.85e-05	0.000212343	-3.55642	1000	Mcmdc2	Mcmdc2	protein_coding
chr8	62470001	62471001		12727	-1096	ENSRNOG00000019500	+	0	0	1	0	0	1.69e-05	0.000197609	-3.55257	1000	Cyp1a1	Cyp1a1	protein_coding
chr17	71903001	71904001		21874	-5030	ENSRNOG00000029235	-	0	0	0	0	0	3.91e-05	0.000384292	-3.55208	1000	Sfmbt2	Sfmbt2	protein_coding
chr16	7337001	7338001		20535	317	ENSRNOG00000019097	+	1	0	1	1	1	0.000250397	0.00168355	-3.54934	1000	Bap1	Bap1	protein_coding
chr8	48736001	48737001		12550	0	ENSRNOG00000012137	-	0	0	1	1	1	1.99e-06	3.48e-05	-3.54671	1000	Ccdc84	Rps25	protein_coding
chr4	180886001	180887001		7425	51	ENSRNOG00000001808	-	1	0	1	1	1	0.000150898	0.00112794	-3.54618	1000	Ints13	Ints13	protein_coding
chr17	10677001	10678001		21418	59	ENSRNOG00000000104	+	0	0	1	1	1	3.04e-06	4.93e-05	-3.54542	1000	Thoc3	Thoc3	protein_coding
chr16	20860001	20861001		20759	0	ENSRNOG00000062030	-	1	0	1	1	1	5.78e-05	0.000518328	-3.54428	1000	Cers1	Gdf1	protein_coding
chr5	136406001	136407001		8276	0	ENSRNOG00000019381	+	1	0	1	1	1	5.25e-05	0.000481352	-3.54352	1000	Eri3	Dmap1	protein_coding
chr9	10599001	10600001		13577	-3814	ENSRNOG00000047247	+	0	0	1	0	0	5.59e-05	0.00050471	-3.54114	1000	Ptprs	Ptprs	protein_coding
chr3	165741001	165742001		5938	0	ENSRNOG00000012762	-	1	0	1	1	1	1.8e-09	1.01e-07	-3.54108	1000	Zfp64	Zfp64	protein_coding
chr4	79999001	80000001		6680	-9430	ENSRNOG00000009970	-	0	0	0	0	0	1.06e-16	7.59e-14	-3.53663	1000	Gsdme	Gsdme	protein_coding
chr10	31146001	31147001		14851	0	ENSRNOG00000042980	+	1	0	1	1	1	0.000205496	0.0014382	-3.53389	1000	Adam19	Adam19	protein_coding
chr2	104404001	104405001		3331	-11973	ENSRNOG00000012723	+	0	0	0	0	0	3.55e-14	1.13e-11	-3.53382	1000	Trim55	RGD1562890	protein_coding
chrX	72034001	72035001		24527	0	ENSRNOG00000003208	-	1	0	1	1	1	0.00152953	0.00710197	-3.52793	1000	Ercc6l	Ercc6l	protein_coding
chr10	74885001	74886001		15570	-986	ENSRNOG00000007496	+	0	0	1	0	0	0.00137684	0.00653704	-3.5228	1000	Mtmr4	Mtmr4	protein_coding
chr5	156053001	156054001		8812	26091	ENSRNOG00000013825	+	0	0	0	0	1	6.55e-05	0.000572073	-3.52105	1000	Rap1gap	Rap1gap	protein_coding
chr3	5481001	5482001		4424	0	ENSRNOG00000060005	-	1	0	1	1	1	0.000109643	0.000872044	-3.51738	1000	Surf4	Stkld1	protein_coding
chr18	324001	325001		22028	375	ENSRNOG00000002697	-	0	0	1	0	1	0.000445771	0.00267054	-3.51604	1000	Mtmr1	Mtmr1	protein_coding
chr5	158733001	158734001		8880	1263	ENSRNOG00000052537	-	0	0	0	0	1	2.01e-05	0.000225801	-3.51358	1000	AABR07050265.1	Igsf21	lincRNA
chr17	44834001	44835001		21735	0	ENSRNOG00000054292	-	0	0	1	1	0	1.27e-08	5.13e-07	-3.51353	1000	AC114096.1	Hist1h2bd	miRNA
chr13	88497001	88498001		18587	0	ENSRNOG00000002926	-	1	0	1	1	1	5.39e-10	3.62e-08	-3.51092	1000	Uap1	Uap1	protein_coding
chr1	221486001	221487001		2190	0	ENSRNOG00000021003	-	0	0	1	1	1	0.00218987	0.00942825	-3.51047	1000	Sac3d1	Snx15	protein_coding
chr3	175838001	175839001		6115	0	ENSRNOG00000053430	+	1	0	1	1	0	0.00209054	0.00907586	-3.50693	1000	Slco4a1	Slco4a1	protein_coding
chr10	83154001	83155001		15671	0	ENSRNOG00000004417	+	1	0	1	1	0	3.18e-05	0.000326771	-3.50416	1000	Fam117a	Fam117a	protein_coding
chr17	43050001	43051001		21691	0	ENSRNOG00000016576	+	1	0	1	1	0	2.45e-07	6.13e-06	-3.50231	1000	Carmil1	Carmil1	protein_coding
chr17	9519001	9520001		21358	0	ENSRNOG00000021637	-	1	0	1	1	1	0.00135522	0.00645586	-3.50083	1000	Ddx46	Ddx46	protein_coding
chr5	159582001	159583001		8911	50	ENSRNOG00000008334	-	0	0	1	0	1	0.000959771	0.00488864	-3.49961	1000	Crocc	Crocc	protein_coding
chr3	160301001	160302001		5779	0	ENSRNOG00000010868	-	1	0	1	1	1	0.000910906	0.00470668	-3.49729	1000	Rims4	Rims4	protein_coding
chr4	177196001	177197001		7384	0	ENSRNOG00000014018	-	1	0	1	1	0	2.46e-05	0.000265895	-3.49503	1000	St8sia1	St8sia1	protein_coding
chr3	3659001	3660001		4402	7	ENSRNOG00000018427	-	0	0	1	1	1	0.000140182	0.00106597	-3.48835	1000	Lhx3	Qsox2	protein_coding
chr6	92057001	92058001		9847	0	ENSRNOG00000004893	-	1	0	1	1	1	7.92e-07	1.67e-05	-3.48145	1000	Dmac2l	L2hgdh	protein_coding
chr1	190555001	190556001		1715	0	ENSRNOG00000036742	+	1	0	1	1	1	2.75e-05	0.000289954	-3.4792	1000	Uqcrc2	Uqcrc2	protein_coding
chr8	115981001	115982001		13210	0	ENSRNOG00000014576	-	1	0	1	1	1	7.44e-11	6.67e-09	-3.47862	1000	Dock3	Mapkapk3	protein_coding
chr10	62303001	62304001		15350	0	ENSRNOG00000037275	+	1	0	1	1	1	0.00213187	0.00922025	-3.47817	1000	Tlcd2	Mir22	protein_coding
chr3	111160001	111161001		5260	0	ENSRNOG00000014387	+	1	0	1	1	1	0.00227862	0.00973943	-3.47708	1000	Chac1	Chac1	protein_coding
chr4	89079001	89080001		6745	0	ENSRNOG00000007304	+	1	0	1	1	1	9.69e-06	0.000126435	-3.46938	1000	Herc3	Herc3	protein_coding
chr14	38192001	38193001		19197	0	ENSRNOG00000058588	+	1	0	1	1	1	0.000537302	0.00310207	-3.45337	1000	Nfxl1	Nfxl1	protein_coding
chr1	72580001	72581001		462	0	ENSRNOG00000016930	+	1	0	1	1	1	3.69e-05	0.000367354	-3.45332	1000	Ube2s	Ube2s	protein_coding
chr1	228142001	228143001		2329	0	ENSRNOG00000021005	+	1	0	1	1	1	0.000262088	0.00174996	-3.44376	1000	Mrpl16	Mrpl16	protein_coding
chr12	41667001	41668001		17824	3438	ENSRNOG00000001392	-	0	0	0	1	1	2.3e-05	0.000250897	-3.44367	1000	Lhx5	Lhx5	protein_coding
chr18	31165001	31166001		22293	-28802	ENSRNOG00000055527	-	0	0	0	0	0	0.000796638	0.00425365	-3.43966	1000	Arap3	Fchsd1	protein_coding
chr2	164549001	164550001		3596	0	ENSRNOG00000012827	+	1	0	1	1	1	0.000846465	0.0044627	-3.43915	1000	Mlf1	Mlf1	protein_coding
chr18	26568001	26569001		22182	-43	ENSRNOG00000058981	+	0	0	1	0	0	9.64e-07	1.97e-05	-3.43733	1000		Epb41l4a	snoRNA
chr15	43582001	43583001		20128	0	ENSRNOG00000009815	+	1	0	1	1	1	2.64e-06	4.4e-05	-3.43597	1000	Pnma2	Pnma2	protein_coding
chr1	124814001	124815001		1220	-10639	ENSRNOG00000015822	-	0	0	0	0	0	5.14e-06	7.45e-05	-3.43247	1000	Klf13	Klf13	protein_coding
chr14	85138001	85139001		19524	-3280	ENSRNOG00000008456	+	0	0	1	0	0	2.1e-06	3.65e-05	-3.43081	1000	Thoc5	Thoc5	protein_coding
chr8	128576001	128577001		13424	-81	ENSRNOG00000016942	+	0	0	1	0	0	0.000818375	0.00435209	-3.41995	1000	Wdr48	Wdr48	protein_coding
chr16	77154001	77155001		21113	-15362	ENSRNOG00000057882	-	0	0	0	0	0	0.00202302	0.00882517	-3.4188	1000	LOC108348426	Csmd1	lincRNA
chr13	40300001	40301001		18242	0	ENSRNOG00000039928	+	0	0	1	1	1	0.000508032	0.00296782	-3.41875	1000	AABR07020786.1	Dpp10	protein_coding
chr4	38255001	38256001		6416	0	ENSRNOG00000005775	+	1	0	1	1	1	3.71e-06	5.73e-05	-3.41505	1000	Phf14	Phf14	protein_coding
chr18	16107001	16108001		22132	28887	ENSRNOG00000059584	-	0	0	0	0	0	0.00141373	0.00667705	-3.41261	1000	U6	Galnt1	snRNA
chr4	179307001	179308001		7403	0	ENSRNOG00000015514	-	1	0	1	1	1	0.000133216	0.00102436	-3.40887	1000	Bcat1	Bcat1	protein_coding
chr2	24539001	24540001		2966	-6537	ENSRNOG00000010560	+	0	0	0	0	0	0.000229717	0.00156802	-3.40626	1000	Otp	Otp	protein_coding
chr11	84643001	84644001		16983	-9498	ENSRNOG00000033372	-	0	0	0	0	0	3.05e-05	0.000315771	-3.40499	1000	Klhl24	Klhl24	protein_coding
chr3	150663001	150664001		5649	-22639	ENSRNOG00000059043	+	0	0	0	0	0	3.22e-08	1.12e-06	-3.40425	1000	Itch	Itch	protein_coding
chr6	107402001	107403001		10026	-25509	ENSRNOG00000038183	+	0	0	0	0	0	8.72e-11	7.51e-09	-3.40371	1000	Heatr4	Riox1	protein_coding
chr6	27190001	27191001		9523	0	ENSRNOG00000009790	-	1	0	1	1	1	2.58e-06	4.31e-05	-3.40261	1000	Kcnk3	Kcnk3	protein_coding
chr1	15062001	15063001		100	0	ENSRNOG00000012074	+	1	0	1	1	1	0.00113542	0.00561423	-3.40193	1000	Ifngr1	Ifngr1	protein_coding
chr18	48201001	48202001		22366	0	ENSRNOG00000017488	+	1	0	1	1	0	1.68e-07	4.51e-06	-3.40172	1000	Snx24	Snx24	protein_coding
chr5	127405001	127406001		8152	552	ENSRNOG00000013064	+	0	0	1	1	1	9.22e-07	1.91e-05	-3.40041	1000	Lrp8	Magoh	protein_coding
chr11	86552001	86553001		16999	0	ENSRNOG00000001892	+	1	0	1	1	1	0.000739929	0.00400829	-3.39541	1000	Tbx1	Tbx1	protein_coding
chr9	10847001	10848001		13588	406	ENSRNOG00000050748	+	0	0	1	0	1	4.84e-06	7.09e-05	-3.39532	1000	Dpp9	Dpp9	protein_coding
chr16	32439001	32440001		20843	0	ENSRNOG00000010418	-	1	0	1	1	1	0.00120623	0.00587679	-3.3947	1000	Nek1	Nek1	protein_coding
chr1	222229001	222230001		2233	0	ENSRNOG00000021151	+	1	0	1	1	0	0.000302723	0.00196315	-3.39459	1000	Ppp1r14b	Ppp1r14b	protein_coding
chr3	14456001	14457001		4678	-10331	ENSRNOG00000018991	+	0	0	0	0	0	4.41e-05	0.00042069	-3.39293	1000	Gsn	Gsn	protein_coding
chr1	143819001	143820001		1390	-296	ENSRNOG00000019770	-	0	0	1	0	0	0.000309894	0.00199907	-3.39172	1000	Bnc1	Bnc1	protein_coding
chr12	46794001	46795001		17953	0	ENSRNOG00000001148	-	1	0	1	1	1	0.000293305	0.00191075	-3.38996	1000	Rplp0	Rplp0	protein_coding
chr7	142261001	142262001		12063	-106	ENSRNOG00000048932	-	0	0	1	0	0	4.81e-08	1.58e-06	-3.38677	1000	Smagp	Smagp	protein_coding
chr1	12824001	12825001		81	639	ENSRNOG00000056940	+	1	1	1	1	1	0.000166848	0.00122365	-3.38674	1000	Cited2	Cited2	protein_coding
chr7	141118001	141119001		12026	17701	ENSRNOG00000058430	-	0	0	0	0	0	0.0018782	0.00832911	-3.38429	1000	Bcdin3d	Bcdin3d	protein_coding
chr2	148721001	148722001		3546	-232	ENSRNOG00000011763	+	1	0	1	1	1	5.17e-05	0.000475864	-3.38095	1000	Serp1	Serp1	protein_coding
chr2	193572001	193573001		3807	0	ENSRNOG00000009602	+	0	0	1	1	1	0.000367484	0.00227962	-3.37786	1000	AABR07012329.1	Lce1m	protein_coding
chr1	220939001	220940001		2158	-188	ENSRNOG00000020669	-	0	0	1	0	0	0.000169721	0.00124262	-3.37751	1000	Ovol1	Ovol1	protein_coding
chr8	48449001	48450001		12531	0	ENSRNOG00000007720	-	0	0	1	1	0	1.46e-07	4.02e-06	-3.37527	1000	Rnf26	Rnf26	protein_coding
chr5	169109001	169110001		9126	0	ENSRNOG00000008802	+	1	0	1	1	1	4e-06	6.09e-05	-3.37371	1000	Dnajc11	Dnajc11	protein_coding
chr11	52546001	52547001		16736	-57164	ENSRNOG00000056538	-	0	0	0	0	0	2.72e-07	6.73e-06	-3.37005	1000	AABR07034100.1	Bbx	lincRNA
chr8	12993001	12994001		12234	0	ENSRNOG00000024726	-	1	0	1	1	1	0.000951955	0.00486184	-3.36806	1000	LOC108348070	Kdm4d	protein_coding
chr1	167374001	167375001		1566	0	ENSRNOG00000020425	+	1	0	1	1	1	0.000892757	0.00463546	-3.36591	1000	Stim1	Stim1	protein_coding
chr3	176547001	176548001		6138	0	ENSRNOG00000011202	-	1	0	1	1	1	1.43e-07	3.95e-06	-3.35921	1000	Chrna4	Chrna4	protein_coding
chr1	56167001	56168001		341	22	ENSRNOG00000022921	-	1	0	1	1	1	0.00129261	0.0062181	-3.35357	1000	Dact2	Dact2	protein_coding
chr4	174799001	174800001		7368	-10960	ENSRNOG00000008929	+	0	0	0	0	0	8.36e-05	0.000698947	-3.35279	1000	Aebp2	Aebp2	protein_coding
chr2	125750001	125751001		3444	-1131	ENSRNOG00000028335	+	0	0	1	0	0	0.00179329	0.00802057	-3.35219	1000	Fat4	Fat4	protein_coding
chr17	85377001	85378001		21974	-4117	ENSRNOG00000022021	+	0	0	1	0	0	0.000443434	0.00265933	-3.35054	1000	Spag6	Spag6l	protein_coding
chr2	211344001	211345001		4035	0	ENSRNOG00000051850	-	0	0	1	1	0	0.000596199	0.00337363	-3.3492	1000		Tmem167b	scaRNA
chr5	169110001	169111001		9127	95	ENSRNOG00000008802	+	0	0	1	0	1	2.7e-11	2.87e-09	-3.34897	1000	Dnajc11	Dnajc11	protein_coding
chr3	172537001	172538001		6065	0	ENSRNOG00000050697	-	1	0	1	1	1	0.000282638	0.0018592	-3.34672	1000	Ctsz	Ctsz	protein_coding
chr7	76909001	76910001		11287	-55162	ENSRNOG00000006816	-	0	0	0	0	0	4.69e-06	6.91e-05	-3.34359	1000	Ubr5	Rrm2b	protein_coding
chr7	63747001	63748001		11152	0	ENSRNOG00000023824	+	1	0	1	1	1	8.18e-13	1.45e-10	-3.34149	1000	RGD1561648	RGD1561648	protein_coding
chr2	206699001	206700001		3970	0	ENSRNOG00000019885	-	1	0	1	1	0	1.36e-05	0.000165868	-3.33972	1000	Magi3	Magi3	protein_coding
chr18	37819001	37820001		22337	0	ENSRNOG00000018992	-	1	0	1	1	0	0.000211529	0.00146962	-3.33798	1000	Dpysl3	Dpysl3	protein_coding
chr1	80544001	80545001		618	0	ENSRNOG00000033235	-	0	0	1	1	1	5.86e-07	1.3e-05	-3.33209	1000	Relb	Clasrp	protein_coding
chr5	61410001	61411001		7844	0	ENSRNOG00000011320	-	1	0	1	1	1	4.4e-09	2.12e-07	-3.33015	1000	Igfbpl1	Igfbpl1	protein_coding
chr4	127824001	127825001		7022	0	ENSRNOG00000005686	-	1	0	1	1	1	1.03e-05	0.000133253	-3.32484	1000	Suclg2	Suclg2	protein_coding
chr2	241908001	241909001		4196	-833	ENSRNOG00000009882	+	0	0	1	0	0	0.000281728	0.00185436	-3.32456	1000	Ppp3ca	Ppp3ca	protein_coding
chr5	103479001	103480001		8018	0	ENSRNOG00000006761	+	1	0	1	1	1	1.84e-05	0.000211391	-3.32426	1000	Sh3gl2	Sh3gl2	protein_coding
chr1	141349001	141350001		1326	0	ENSRNOG00000015526	-	1	0	1	1	1	0.000201178	0.00141492	-3.32282	1000	Rhcg	Rhcg	protein_coding
chr10	81850001	81851001		15623	37157	ENSRNOG00000054653	-	0	0	0	0	0	2.85e-11	2.98e-09	-3.32092	1000	AABR07030334.1	Tob1	lincRNA
chr7	144013001	144014001		12142	-174	ENSRNOG00000014084	+	0	0	1	0	0	0.000535987	0.00309838	-3.32057	1000	Sp1	Sp1	protein_coding
chr14	21143001	21144001		19121	11653	ENSRNOG00000003599	-	0	0	0	0	0	2.3e-06	3.93e-05	-3.31551	1000	Utp3	Utp3	protein_coding
chr3	152934001	152935001		5691	231	ENSRNOG00000020317	+	0	0	1	1	1	4.45e-05	0.000423929	-3.31138	1000	Rab5if	Rab5if	protein_coding
chr8	82546001	82547001		12959	-12313	ENSRNOG00000010447	-	0	0	0	0	0	7.67e-07	1.63e-05	-3.31069	1000	Tmod2	Tmod2	protein_coding
chr3	124130001	124131001		5436	14567	ENSRNOG00000021256	-	0	1	0	1	1	4.08e-05	0.000398216	-3.30952	1000	Adra1d	Adra1d	protein_coding
chr16	20133001	20134001		20681	0	ENSRNOG00000018764	-	1	0	1	1	1	0.00100195	0.00506284	-3.30677	1000	B3gnt3	B3gnt3	protein_coding
chr7	123088001	123089001		11672	0	ENSRNOG00000024177	-	1	0	1	1	1	2.26e-06	3.87e-05	-3.30489	1000	AC096601.1	Tob2	protein_coding
chr11	38456001	38457001		16696	374	ENSRNOG00000001623	-	0	0	1	0	1	2.79e-06	4.59e-05	-3.30392	1000	Zbtb21	Zbtb21	protein_coding
chr10	46412001	46413001		15044	-7360	ENSRNOG00000054423	-	0	0	0	0	0	5.26e-05	0.000482169	-3.29953	1000	Pemt	Pemt	protein_coding
chr17	34903001	34904001		21666	0	ENSRNOG00000061070	-	1	0	1	1	1	6.64e-07	1.45e-05	-3.29891	1000	Irf4	Irf4	protein_coding
chr4	118197001	118198001		6909	30	ENSRNOG00000016704	-	1	0	1	1	1	0.000780406	0.00418131	-3.29737	1000	Pcyox1	Pcyox1	protein_coding
chr1	84576001	84577001		770	2506	ENSRNOG00000037673	+	0	0	0	0	0	1.16e-05	0.000145627	-3.2946	1000	AABR07071891.1	Map3k10	protein_coding
chr17	9110001	9111001		21342	271	ENSRNOG00000011984	+	0	0	1	1	1	4.28e-05	0.000410572	-3.2938	1000	Cxcl14	Cxcl14	protein_coding
chr13	73197001	73198001		18479	431	ENSRNOG00000003550	+	1	0	1	1	1	0.000766401	0.00411915	-3.29301	1000	Acbd6	Acbd6	protein_coding
chr7	2796001	2797001		10511	101	ENSRNOG00000030597	+	0	0	1	1	1	1.82e-06	3.21e-05	-3.29216	1000	Ankrd52	Ankrd52	protein_coding
chr1	203511001	203512001		1870	1271	ENSRNOG00000020637	+	0	1	1	1	0	2.11e-05	0.000234137	-3.29047	1000	Hmx3	Hmx3	protein_coding
chr20	18687001	18688001		23973	-92606	ENSRNOG00000000614	+	0	0	0	0	0	0.000100499	0.00081753	-3.29005	1000	Bicc1	Bicc1	protein_coding
chr1	157920001	157921001		1461	0	ENSRNOG00000010763	+	1	0	1	1	1	0.000160643	0.0011868	-3.29001	1000	Fam181b	Fam181b	protein_coding
chr19	38768001	38769001		23105	0	ENSRNOG00000020151	+	1	0	1	1	1	0.000165168	0.00121542	-3.28675	1000	Cdh1	Cdh1	protein_coding
chr3	119698001	119699001		5350	0	ENSRNOG00000013479	+	1	0	1	1	0	0.00052677	0.00305437	-3.2867	1000	Stard7	Stard7	protein_coding
chr4	78025001	78026001		6656	237	ENSRNOG00000007405	+	1	0	1	1	1	3e-06	4.87e-05	-3.28655	1000	Krba1	Zfp467	protein_coding
chr6	9459001	9460001		9401	0	ENSRNOG00000014720	-	1	0	1	1	0	2.83e-06	4.64e-05	-3.28635	1000	Srbd1	Prkce	protein_coding
chr4	86833001	86834001		6732	0	ENSRNOG00000052491	-	0	0	1	1	1	1.85e-05	0.000212449	-3.2857	1000	AABR07060620.1	Pde1c	lincRNA
chr8	94563001	94564001		13028	0	ENSRNOG00000023861	-	1	0	1	1	1	9.63e-06	0.000125838	-3.28085	1000	Snap91	Snap91	protein_coding
chr7	120465001	120466001		11594	0	ENSRNOG00000011507	+	1	0	1	1	1	0.000665351	0.00367989	-3.28071	1000	Pick1	Pick1	protein_coding
chr20	3796001	3797001		23558	0	ENSRNOG00000059770	-	1	0	1	1	1	1.57e-13	3.74e-11	-3.27565	1000	AABR07044383.1	RT1-A3	protein_coding
chr6	136002001	136003001		10355	-1215	ENSRNOG00000010218	+	0	0	1	1	1	3.38e-05	0.000342401	-3.27527	1000	Eif5	Eif5	protein_coding
chr7	114889001	114890001		11433	20265	ENSRNOG00000053874	-	0	0	0	0	0	0.00141891	0.00669739	-3.27104	1000	AABR07058410.2	Gpr20	lincRNA
chr7	117576001	117577001		11516	0	ENSRNOG00000028711	-	1	0	1	1	1	1.4e-07	3.89e-06	-3.2678	1000	Dgat1	Dgat1	protein_coding
chr1	81457001	81458001		664	18	ENSRNOG00000019982	+	1	0	1	1	1	0.00199373	0.0087311	-3.26541	1000	Ethe1	Ethe1	protein_coding
chr3	12688001	12689001		4650	-1133	ENSRNOG00000017019	-	0	0	1	0	0	6.36e-05	0.000559795	-3.26537	1000	Lmx1b	Lmx1b	protein_coding
chr17	54181001	54182001		21778	0	ENSRNOG00000056249	-	1	0	1	1	1	7.49e-10	4.75e-08	-3.26474	1000	LOC108348568	Kif5b	lincRNA
chr12	11179001	11180001		17235	0	ENSRNOG00000000983	+	1	0	1	1	1	2.54e-05	0.000272102	-3.26419	1000	Zfp394	Zfp394	protein_coding
chr2	194740001	194741001		3819	134963	ENSRNOG00000054790	-	0	0	0	0	0	0.00142637	0.00672751	-3.26398	1000	RGD1566337	LOC103689947	protein_coding
chr1	65537001	65538001		395	0	ENSRNOG00000027514	+	1	0	1	1	0	0.00024311	0.00164698	-3.26353	1000	Ube2m	Ube2m	protein_coding
chr2	84678001	84679001		3271	0	ENSRNOG00000011632	-	1	0	1	1	1	4.05e-05	0.000395576	-3.26031	1000	Cct5	Cct5	protein_coding
chr11	17130001	17131001		16559	0	ENSRNOG00000001554	-	1	0	1	1	0	2.02e-10	1.58e-08	-3.25743	1000	RGD1563888	RGD1563888	protein_coding
chr13	70379001	70380001		18452	0	ENSRNOG00000027697	+	1	0	1	1	1	6.56e-07	1.43e-05	-3.25629	1000	Nmnat2	Nmnat2	protein_coding
chr4	147273001	147274001		7117	-108	ENSRNOG00000008839	+	0	0	1	0	0	0.000771541	0.00414099	-3.25578	1000	Pparg	Pparg	protein_coding
chr14	76989001	76990001		19354	0	ENSRNOG00000028498	+	1	0	1	1	0	2.7e-05	0.000286078	-3.25173	1000	Wdr1	Wdr1	protein_coding
chr17	57997001	57998001		21805	-12966	ENSRNOG00000016834	-	0	0	0	0	1	2.66e-09	1.42e-07	-3.25131	1000	Wdr37	Idi1	protein_coding
chr7	124423001	124424001		11715	0	ENSRNOG00000010539	-	1	0	1	1	1	5.06e-05	0.000467045	-3.25039	1000	Mcat	Mcat	protein_coding
chr4	62704001	62705001		6568	223	ENSRNOG00000010852	+	0	0	1	0	1	1.9e-06	3.35e-05	-3.24602	1000	Nup205	Nup205	protein_coding
chr3	161463001	161464001		5823	29592	ENSRNOG00000018111	+	0	0	0	0	0	4.82e-05	0.000449528	-3.24447	1000	Slc12a5	Slc12a5	protein_coding
chr17	52569001	52570001		21769	0	ENSRNOG00000014395	-	1	0	1	1	0	3.65e-07	8.6e-06	-3.24385	1000	Gli3	Gli3	protein_coding
chr10	13037001	13038001		14608	13155	ENSRNOG00000028231	-	0	0	0	0	0	0.00163044	0.00745806	-3.24348	1000	AABR07029202.1	Pkmyt1	protein_coding
chrX	123487001	123488001		24644	0	ENSRNOG00000039985	+	1	0	1	1	1	0.000357193	0.00223354	-3.23405	1000	Ube2a	Ube2a	protein_coding
chr9	100625001	100626001		14358	126	ENSRNOG00000017952	+	0	0	1	0	1	8.33e-06	0.000111473	-3.23371	1000	Septin2	2026-09-02	protein_coding
chr9	55049001	55050001		13983	-204	ENSRNOG00000015416	+	0	0	1	0	0	0.00228904	0.00976775	-3.23057	1000	Nabp1	Nabp1	protein_coding
chr2	218834001	218835001		4055	0	ENSRNOG00000013719	+	1	0	1	1	1	4.16e-05	0.00040125	-3.22792	1000	Dph5	Dph5	protein_coding
chr3	154212001	154213001		5707	0	ENSRNOG00000012021	+	1	0	1	1	1	7.07e-05	0.000607266	-3.22582	1000	Ctnnbl1	Ctnnbl1	protein_coding
chr12	19573001	19574001		17427	0	ENSRNOG00000027028	+	1	1	1	1	1	0.000929357	0.004769	-3.22329	1000	Lamtor4	Lamtor4	protein_coding
chr6	137995001	137996001		10434	-1336	ENSRNOG00000005174	+	0	0	1	0	0	2.9e-05	0.000302418	-3.22224	1000	Tmem121	Crip1	protein_coding
chr2	107218001	107219001		3339	-14055	ENSRNOG00000011216	+	0	0	0	0	0	4.47e-06	6.65e-05	-3.22086	1000	Tbl1xr1	Tbl1xr1	protein_coding
chr11	81380001	81381001		16932	-131	ENSRNOG00000001815	-	0	0	1	0	0	3.97e-05	0.000388538	-3.21626	1000	Eif4a2	Eif4a2	protein_coding
chr20	4572001	4573001		23599	0	ENSRNOG00000000418	+	1	0	1	1	1	0.000139768	0.00106518	-3.21408	1000	Zbtb12	Zbtb12	protein_coding
chr5	25722001	25723001		7605	-930	ENSRNOG00000016187	-	0	0	1	0	0	0.000215318	0.00148974	-3.21087	1000	Tmem67	Tmem67	protein_coding
chr5	168570001	168571001		9111	95369	ENSRNOG00000050867	+	0	0	0	0	1	0.00137778	0.00653972	-3.20595	1000	AABR07050530.1	Vamp3	pseudogene
chr19	25120001	25121001		22919	0	ENSRNOG00000052637	+	0	0	1	1	1	3.59e-11	3.6e-09	-3.19853	1000	Samd1	Mir1199	protein_coding
chr9	80165001	80166001		14116	808	ENSRNOG00000017206	-	0	0	1	1	1	0.00229685	0.00979294	-3.19754	1000	Igfbp5	Igfbp5	protein_coding
chr2	124401001	124402001		3439	313	ENSRNOG00000025371	+	1	0	1	1	1	2.65e-23	9.07e-20	-3.19057	1000	Spry1	Spry1	protein_coding
chr7	130288001	130289001		11834	0	ENSRNOG00000008392	-	1	0	1	1	1	1.83e-06	3.22e-05	-3.18966	1000	Sbf1	Sbf1	protein_coding
chr2	235257001	235258001		4153	0	ENSRNOG00000061146	-	1	0	1	1	1	6.88e-05	0.000594262	-3.18873	1000	Gar1	Gar1	protein_coding
chr1	222907001	222908001		2263	0	ENSRNOG00000023528	+	1	0	1	1	1	0.000103989	0.00083951	-3.18727	1000	Plaat5	Plaat5	protein_coding
chr3	7632001	7633001		4469	0	ENSRNOG00000028805	-	1	0	1	1	1	8.25e-10	5.18e-08	-3.18685	1000	Cfap77	Cfap77	protein_coding
chr5	141365001	141366001		8383	-1478	ENSRNOG00000016047	-	0	0	1	0	0	0.000972955	0.00493526	-3.18434	1000	Macf1	Macf1	protein_coding
chr14	21155001	21156001		19123	0	ENSRNOG00000003599	-	1	0	1	1	0	1.64e-07	4.43e-06	-3.18321	1000	Utp3	Utp3	protein_coding
chrX	63203001	63204001		24496	0	ENSRNOG00000005624	-	1	0	1	1	1	1.65e-05	0.000193041	-3.17964	1000	Zfx	Eif2s3	protein_coding
chr15	4057001	4058001		19781	0	ENSRNOG00000009042	-	1	0	1	1	1	3.94e-08	1.33e-06	-3.17672	1000	Sec24c	Sec24c	protein_coding
chr1	78817001	78818001		535	-405	ENSRNOG00000016701	+	0	0	1	0	0	0.00218741	0.00942003	-3.17463	1000	Gng8	Gng8	protein_coding
chr6	102474001	102475001		9965	-1076	ENSRNOG00000059875	-	0	0	1	0	0	0.000674811	0.00371901	-3.17228	1000	Zfyve26	Zfyve26	protein_coding
chr19	53011001	53012001		23273	-333	ENSRNOG00000049906	+	0	0	1	0	0	3.06e-12	4.48e-10	-3.17154	1000	Foxf1	Fendrr	protein_coding
chr4	57049001	57050001		6512	-215	ENSRNOG00000039300	+	0	0	1	0	0	0.000500781	0.00293345	-3.16836	1000	Ahcyl2	Ahcyl2	protein_coding
chrX	114232001	114233001		24624	0	ENSRNOG00000022166	-	0	0	1	1	1	0.00215473	0.00930033	-3.16557	1000	Ammecr1	Mir652	protein_coding
chr1	101700001	101701001		1104	-976	ENSRNOG00000021035	+	0	0	1	0	0	0.00136667	0.00649557	-3.16359	1000	Rpl18	Rpl18	protein_coding
chr14	114699001	114700001		19730	-6238	ENSRNOG00000005434	-	0	0	0	0	0	0.000153366	0.00114339	-3.16159	1000	Sptbn1	Sptbn1	protein_coding
chr4	119633001	119634001		6930	0	ENSRNOG00000009787	+	1	0	1	1	0	2.5e-06	4.21e-05	-3.16058	1000	Efcc1	Efcc1	protein_coding
chr14	10842001	10843001		19022	-11683	ENSRNOG00000002251	+	0	0	0	0	0	5.35e-06	7.71e-05	-3.15936	1000	Sec31a	Sec31a	protein_coding
chr8	132344001	132345001		13487	709	ENSRNOG00000004757	-	0	1	1	1	0	1.28e-06	2.45e-05	-3.15912	1000	Tmem158	Tmem158	protein_coding
chr7	143576001	143577001		12113	-6077	ENSRNOG00000059186	+	0	0	0	0	0	0.000123829	0.00096693	-3.1587	1000	AC108351.3	Krt8	processed_pseudogene
chr2	210240001	210241001		4011	456	ENSRNOG00000060988	-	0	0	1	1	1	0.00148778	0.0069483	-3.1578	1000	Kcnc4	Kcnc4	protein_coding
chr5	169182001	169183001		9133	584	ENSRNOG00000003334	+	0	0	1	1	1	0.000144174	0.00109052	-3.1541	1000	Klhl21	Klhl21	protein_coding
chr16	50111001	50112001		20925	0	ENSRNOG00000042426	+	1	0	1	1	0	0.00229254	0.00977942	-3.15243	1000	Cyp4v3	Cyp4v3	protein_coding
chr1	222197001	222198001		2228	0	ENSRNOG00000021145	-	1	0	1	1	0	4.63e-08	1.53e-06	-3.15228	1000	Gpr137	Gpr137	protein_coding
chr2	198006001	198007001		3863	0	ENSRNOG00000023816	+	1	0	1	1	1	2.93e-05	0.000305867	-3.15223	1000	Aph1a	Aph1a	protein_coding
chr2	182723001	182724001		3654	0	ENSRNOG00000009465	+	1	0	1	1	0	6.08e-12	7.95e-10	-3.14895	1000	Sfrp2	Sfrp2	protein_coding
chr7	50638001	50639001		11066	0	ENSRNOG00000006426	-	1	0	1	1	1	0.000351573	0.00220487	-3.14544	1000	Syt1	Syt1	protein_coding
chr4	162832001	162833001		7310	-19	ENSRNOG00000061420	-	0	0	1	0	0	2.29e-07	5.81e-06	-3.143	1000	AABR07062154.1	Clec2e	pseudogene
chr12	13067001	13068001		17272	0	ENSRNOG00000024605	-	1	0	1	1	0	4.09e-05	0.000398227	-3.13903	1000	Fam220a	Fam220a	protein_coding
chrX	45420001	45421001		24471	0	ENSRNOG00000032487	+	1	0	1	1	0	0.00135921	0.00647309	-3.13577	1000	Sts	Sts	protein_coding
chr7	27240001	27241001		10922	0	ENSRNOG00000049093	-	1	0	1	1	1	7.52e-05	0.000639419	-3.13494	1000	AABR07056495.1	Hsp90b1	miRNA
chr6	93539001	93540001		9865	0	ENSRNOG00000054663	+	0	0	1	1	1	0.0012641	0.00611012	-3.13355	1000	AC128303.1	Timm9	protein_coding
chr10	89174001	89175001		15907	0	ENSRNOG00000051179	+	1	1	1	1	1	2.54e-05	0.000272102	-3.13258	1000	Vps25	Vps25	protein_coding
chr1	201498001	201499001		1856	-29	ENSRNOG00000020533	+	0	0	1	0	0	2.87e-08	1.01e-06	-3.12896	1000	Htra1	Htra1	protein_coding
chr9	96721001	96722001		14287	15925	ENSRNOG00000044330	+	0	0	0	0	1	2.97e-14	9.8e-12	-3.12825	1000	5S_rRNA	Agap1	rRNA
chr3	148420001	148421001		5599	7289	ENSRNOG00000008534	-	0	1	0	1	1	5.36e-08	1.73e-06	-3.12818	1000	Dusp15	Dusp15	protein_coding
chr10	57291001	57292001		15263	0	ENSRNOG00000004246	-	1	1	1	1	1	2.48e-09	1.34e-07	-3.12621	1000	Spag7	Spag7	protein_coding
chr3	161812001	161813001		5828	0	ENSRNOG00000018649	-	1	1	1	1	1	0.000283624	0.00186398	-3.1255	1000	Slc35c2	Slc35c2	protein_coding
chr16	74752001	74753001		21098	0	ENSRNOG00000024650	+	0	0	1	1	1	2.31e-09	1.26e-07	-3.12539	1000	Ckap2	Ckap2	protein_coding
chr10	64915001	64916001		15411	0	ENSRNOG00000009350	-	1	0	1	1	1	3.24e-10	2.36e-08	-3.12041	1000	Sez6	Sez6	protein_coding
chr11	60371001	60372001		16750	0	ENSRNOG00000002141	+	1	0	1	1	1	0.000593109	0.00336504	-3.11416	1000	Cd200	Cd200	protein_coding
chr1	13719001	13720001		90	0	ENSRNOG00000053735	-	1	0	1	1	1	0.000557628	0.00319226	-3.11409	1000	Hebp2	Hebp2	protein_coding
chr2	5545001	5546001		2880	18273	ENSRNOG00000062218	-	0	1	0	1	0	6.12e-06	8.67e-05	-3.11286	1000	AC099302.1	Nr2f1	lincRNA
chr9	86571001	86572001		14212	0	ENSRNOG00000053200	-	0	0	1	1	1	2.08e-05	0.000231634	-3.11078	1000	AABR07068161.1	Cul3	processed_transcript
chr13	103301001	103302001		18767	0	ENSRNOG00000002393	+	1	0	1	1	1	9.3e-06	0.000122303	-3.10992	1000	Eprs	Eprs	protein_coding
chr16	21275001	21276001		20789	0	ENSRNOG00000020602	+	0	0	1	1	1	0.000124074	0.0009684	-3.10338	1000	Ndufa13	Ndufa13	protein_coding
chr5	31568001	31569001		7626	0	ENSRNOG00000005708	+	1	0	1	1	1	4.3e-06	6.44e-05	-3.10045	1000	Mmp16	Mmp16	protein_coding
chr7	126691001	126692001		11779	0	ENSRNOG00000032846	-	1	0	1	1	1	0.000176745	0.00128472	-3.09883	1000	Cdpf1	Cdpf1	protein_coding
chr2	122641001	122642001		3412	0	ENSRNOG00000013293	-	1	0	1	1	1	0.000500707	0.00293345	-3.09752	1000	Mccc1	Mccc1	protein_coding
chr7	24314001	24315001		10862	-117	ENSRNOG00000005758	-	0	0	1	0	0	0.000122393	0.000957025	-3.08974	1000	Btbd11	Cry1	protein_coding
chr9	49962001	49963001		13949	-11909	ENSRNOG00000016866	-	0	0	0	0	0	5.5e-05	0.000497553	-3.08954	1000	Fhl2	Fhl2	protein_coding
chr20	7241001	7242001		23747	-9581	ENSRNOG00000045387	-	0	0	0	0	0	0.000187526	0.0013445	-3.08888	1000	5S_rRNA	Pacsin1	rRNA
chr4	7885001	7886001		6275	0	ENSRNOG00000022182	-	0	0	1	1	1	1.11e-07	3.22e-06	-3.08833	1000	Rint1	Pus7	protein_coding
chr3	105470001	105471001		5209	0	ENSRNOG00000008337	-	1	0	1	1	1	3.47e-10	2.5e-08	-3.08683	1000	Gjd2	Gjd2	protein_coding
chr5	138154001	138155001		8308	0	ENSRNOG00000007284	+	1	0	1	1	1	1.56e-09	8.95e-08	-3.08233	1000	Slc2a1	Slc2a1	protein_coding
chr15	57891001	57892001		20251	0	ENSRNOG00000001049	+	1	0	1	1	1	4.13e-05	0.000399903	-3.08045	1000	Tpt1	Tpt1	protein_coding
chr2	39434001	39435001		3097	0	ENSRNOG00000055079	-	1	0	1	1	1	3.25e-05	0.000331624	-3.07796	1000	Ndufaf2	Ercc8	protein_coding
chr9	94880001	94881001		14275	0	ENSRNOG00000017913	+	1	0	1	1	1	0.000384888	0.00236364	-3.0749	1000	Atg16l1	Atg16l1	protein_coding
chr6	99433001	99434001		9929	0	ENSRNOG00000006472	+	1	0	1	1	1	2.93e-14	9.8e-12	-3.07417	1000	Hspa2	Hspa2	protein_coding
chr1	206900001	206901001		1909	0	ENSRNOG00000018683	+	1	0	1	1	1	5.4e-05	0.000490628	-3.06789	1000	Dock1	Dock1	protein_coding
chr4	4690001	4691001		6201	0	ENSRNOG00000059626	-	0	0	1	1	1	1.37e-05	0.000166496	-3.06288	1000	AABR07059142.1	Dpp6	pseudogene
chr2	227658001	227659001		4111	19	ENSRNOG00000015353	+	1	0	1	1	1	1.78e-08	6.83e-07	-3.06287	1000	Prss12	Prss12	protein_coding
chr17	83221001	83222001		21945	0	ENSRNOG00000000142	+	1	0	1	1	0	0.000288802	0.0018886	-3.06022	1000	Plxdc2	Plxdc2	protein_coding
chr3	94687001	94688001		5147	-13	ENSRNOG00000012262	-	0	0	1	0	0	0.00109317	0.00544988	-3.0564	1000	Depdc7	Depdc7	protein_coding
chr5	157820001	157821001		8858	0	ENSRNOG00000017979	-	1	0	1	1	1	5.85e-05	0.000523215	-3.05556	1000	Mrto4	Mrto4	protein_coding
chr12	14244001	14245001		17318	0	ENSRNOG00000001104	-	1	0	1	1	1	5.51e-09	2.53e-07	-3.05397	1000	Foxk1	Foxk1	protein_coding
chr10	13893001	13894001		14649	0	ENSRNOG00000057905	+	0	1	1	1	0	0.00106547	0.00533974	-3.05347	1000		Traf7	snoRNA
chr5	29681001	29682001		7623	6	ENSRNOG00000009358	-	1	0	1	1	1	3.63e-09	1.81e-07	-3.04903	1000	Osgin2	Nbn	protein_coding
chr20	32509001	32510001		24138	0	ENSRNOG00000030109	+	1	0	1	1	1	0.000760326	0.00409677	-3.04577	1000	Kpna5	Kpna5	protein_coding
chr9	40972001	40973001		13832	0	ENSRNOG00000013415	+	0	0	1	1	1	0.000132743	0.00102164	-3.04528	1000	Ptpn18	Ptpn18	protein_coding
chr3	103725001	103726001		5194	-239	ENSRNOG00000005058	+	0	0	1	0	0	4.38e-09	2.12e-07	-3.03993	1000	Lpcat4	Lpcat4	protein_coding
chr18	71394001	71395001		22551	-831	ENSRNOG00000018359	+	0	0	1	0	0	1.31e-06	2.51e-05	-3.03925	1000	Smad7	Smad7	protein_coding
chr1	198298001	198299001		1784	0	ENSRNOG00000019960	-	1	0	1	1	1	1.65e-06	3e-05	-3.03052	1000	Ino80e	Hirip3	protein_coding
chr12	39641001	39642001		17751	0	ENSRNOG00000001283	-	1	0	1	1	1	0.00122601	0.0059503	-3.01887	1000	Anapc7	Anapc7	protein_coding
[truncated: 1,418 more rows]

## Sheet: DMR-F1NvsF1P
	start			target.row	dist.to.feature	feature.name	feature.strand	UTR5	UTR3	prom	exon	intron	pvalue	qvalue	meth.diff	width	external_gene_name	Gene Name	gene_biotype
[truncated: 2,703 more rows]

[truncated: 4 more sheets: DMR-F1NvsF1T, GeneOverlap_F0_F1, DMR.Positions_F0, DMR.Positions_F1]
